# Supplementary material for: Differential Producibility Analysis (DPA) of Transcriptomic Data with Metabolic Networks: Deconstructing the Metabolic Response of M. tuberculosis
Source: PLoS Comput Biol. 2011 Jun 30;7(6):e1002060. doi: 10.1371/journal.pcbi.1002060 (PMC3127818; doi:10.1371/journal.pcbi.1002060)
Supplement: Table S1 — Metabolites associated with up- and down-regulated genes in E. coli. Table S1a, metabolites identified as associated with down-regulated genes on exposure of wild-type E. coli to anaerobic conditions (corresponding to regulatory patterns II, IV, V of [25]), Table S1b, metabolites associated with up-regulated genes in the wild-type in response to anaerobic growth (regulatory patterns I, III, VII), Table S1c, metabolites associated with increased gene expression in the FNR- strain grown under anaerobic conditions (regulatory patterns I, V, VI), and Table S1d, metabolites associated with decreased gene expression in the FNR-strain grown under anaerobic conditions (regulatory patterns II, VII, VIII). (XLS) [file pcbi.1002060.s002.xls]

## Sheet: Table S1a
Table S1a. DPA analysis of transcriptional reponse of E. coli to anaerobic growth: genes that down-regulated under anaerobic conditions
	gene.index	RP/Rsum	FC:(class1/class2)	pfp	P.value	met	FullName	KeggID	COMMENT
glc-D[c]	860	3	2.013	0.7423	0.0013	glc-D	D-Glucose	C00031	sugar metabolism
fru[c]	771	3	2.013	0.7423	0.0013	fru	D-Fructose	C00095	sugar metabolism
glc-D[e]	861	3	2.013	0.7423	0.0013	glc-D	D-Glucose	C00031	sugar metabolism
glc-D[p]	862	3	2.013	0.7423	0.0013	glc-D	D-Glucose	C00031	sugar metabolism
fe2[c]	727	10	1.9659	0.8584	0.0051	fe2	Fe2+	C00023	iron
fe2[e]	728	10	1.9659	0.8584	0.0051	fe2	Fe2+	C00023	iron
fe2[p]	729	10	1.9659	0.8584	0.0051	fe2	Fe2+	C00023	iron
fe3[c]	730	10	1.9659	0.8584	0.0051	fe3	Fe3+	0	iron
glcn[c]	863	10	1.9659	0.8584	0.0051	glcn	D-Gluconate	C00257	Pentose phosphate pathway
12ppd-R[c]	16	22	1.9545	0.9251	0.0122	12ppd-R	(R)-Propane-1,2-diol	C02912	metrhylglyoxyl pathway
12ppd-R[e]	17	22	1.9545	0.9251	0.0122	12ppd-R	(R)-Propane-1,2-diol	C02912	metrhylglyoxyl pathway
12ppd-R[p]	18	22	1.9545	0.9251	0.0122	12ppd-R	(R)-Propane-1,2-diol	C02912	metrhylglyoxyl pathway
dha[e]	628	22	1.9545	0.9251	0.0122	dha	Dihydroxyacetone	C00184	Glycerolipid metabolism
bglycogen[c]	463	22	1.9545	0.9251	0.0122	bglycogen	branching glycogen	0	carbohydrate metabolism
glycogen[c]	911	22	1.9545	0.9251	0.0122	glycogen	glycogen	C00182	carbohydrate metabolism
gal[c]	815	22	1.9545	0.9251	0.0122	gal	D-Galactose	C00124	sugar metabolism
dha[c]	627	22	1.9545	0.9251	0.0122	dha	Dihydroxyacetone	C00184	Glycerolipid metabolism
dha[p]	629	22	1.9545	0.9251	0.0122	dha	Dihydroxyacetone	C00184	Glycerolipid metabolism
dhap[c]	630	36.5	1.9431	1.0026	0.0219	dhap	Dihydroxyacetone phosphate	C00111	glycolysis
gal1p[c]	810	36.5	1.9431	1.0026	0.0219	gal1p	alpha-D-Galactose 1-phosphate	C00446	sugar metabolism
g6p[c]	806	36.5	1.9431	1.0026	0.0219	g6p	D-Glucose 6-phosphate	C00092	glycolysis
g1p[c]	787	36.5	1.9431	1.0026	0.0219	g1p	D-Glucose 1-phosphate	C00103	gluconeogenesis
13dpg[c]	22	36.5	1.9431	1.0026	0.0219	13dpg	3-Phospho-D-glyceroyl phosphate	C00236	glycolysis
f6p[c]	716	36.5	1.9431	1.0026	0.0219	f6p	D-Fructose 6-phosphate	C00085	glycolysis
g3p[c]	790	36.5	1.9431	1.0026	0.0219	g3p	Glyceraldehyde 3-phosphate	C00661	glycolysis
fdp[c]	726	36.5	1.9431	1.0026	0.0219	fdp	D-Fructose 1,6-bisphosphate	C00354	glycolysis
cbp[c]	487	48.5	1.9393	1.0598	0.0308	cbp	Carbamoyl phosphate	C00169	Purine metabolism
allul6p[c]	394	48.5	1.9393	1.0598	0.0308	allul6p	Allulose 6-phosphate	0	sugar metabolism
2ddg6p[c]	119	48.5	1.9393	1.0598	0.0308	2ddg6p	2-Dehydro-3-deoxy-D-gluconate 6-phosphate	C04442	Pentose phosphate pathway
6pgc[c]	275	48.5	1.9393	1.0598	0.0308	6pgc	6-Phospho-D-gluconate	C00345	Pentose phosphate pathway
6pgl[c]	276	48.5	1.9393	1.0598	0.0308	6pgl	6-phospho-D-glucono-1,5-lactone	C01236	Pentose phosphate pathway
all6p[c]	386	48.5	1.9393	1.0598	0.0308	all6p	D-Allose 6-phosphate	C02962	sugar metabolism
gam6p[c]	834	58	1.9355	1.0906	0.0379	gam6p	D-Glucosamine 6-phosphate	C00352	Alanine, aspartate and glutamate metabolism
gam1p[c]	833	58	1.9355	1.0906	0.0379	gam1p	D-Glucosamine 1-phosphate	C06156	Amino sugar and nucleotide sugar metabolism
gmhep7p[c]	915	58	1.9355	1.0906	0.0379	gmhep7p	D-Glycero-D-manno-heptose 7-phosphate	C07836	Lipopolysaccharide biosynthesis
fum[e]	785	58	1.9355	1.0906	0.0379	fum	Fumarate	C00122	TCA cycle
fum[p]	786	58	1.9355	1.0906	0.0379	fum	Fumarate	C00122	TCA cycle
db4p[c]	597	58	1.9355	1.0906	0.0379	db4p	3,4-dihydroxy-2-butanone 4-phosphate	0	riboflavin synthase
fum[c]	784	58	1.9355	1.0906	0.0379	fum	Fumarate	C00122	TCA cycle
gmhep17bp[c]	913	67	1.935	1.0995	0.0442	gmhep17bp	D-Glycero-D-manno-heptose 1,7-bisphosphate	C11472	Lipopolysaccharide biosynthesis
gmhep1p[c]	914	67	1.935	1.0995	0.0442	gmhep1p	D-Glycero-D-manno-heptose 1-phosphate	C07838	Lipopolysaccharide biosynthesis
dhptd[c]	640	67	1.935	1.0995	0.0442	dhptd	4,5-dihydroxy-2,3-pentanedione	C11838	Cysteine and methionine metabolism
5dglcn[p]	264	79	1.9344	1.1357	0.0538	5dglcn	5-Dehydro-D-gluconate	C01062	sugar metabolism
5dglcn[e]	263	79	1.9344	1.1357	0.0538	5dglcn	5-Dehydro-D-gluconate	C01062	sugar metabolism
5dglcn[c]	262	79	1.9344	1.1357	0.0538	5dglcn	5-Dehydro-D-gluconate	C01062	sugar metabolism
ara5p[c]	425	79	1.9344	1.1357	0.0538	ara5p	D-Arabinose 5-phosphate	C01112	Lipopolysaccharide biosynthesis
e4p[c]	694	79	1.9344	1.1357	0.0538	e4p	D-Erythrose 4-phosphate	C00279	Pentose phosphate pathway
2mcacn[c]	140	93	1.8881	1.1769	0.0656	2mcacn	cis-2-Methylaconitate	C04225	Propanoate metabolism
3dhq[c]	176	93	1.8881	1.1769	0.0656	3dhq	3-Dehydroquinate	C00944	Phenylalanine, tyrosine and tryptophan biosynthesis
4per[c]	253	93	1.8881	1.1769	0.0656	4per	4-Phospho-D-erythronate	C03393	Vitamin B6 metabolism
glcn[e]	864	93	1.8881	1.1769	0.0656	glcn	D-Gluconate	C00257	Pentose phosphate pathway
2mcit[c]	141	93	1.8881	1.1769	0.0656	2mcit	2-Methylcitrate	C02225	Propanoate metabolism
3dhsk[c]	177	93	1.8881	1.1769	0.0656	3dhsk	3-Dehydroshikimate	C02637	Phenylalanine, tyrosine and tryptophan biosynthesis
glcn[p]	865	93	1.8881	1.1769	0.0656	glcn	D-Gluconate	C00257	Pentose phosphate pathway
aact[c]	292	103	1.8847	1.1936	0.0737	aact	Aminoacetone	C01888	Glycine, serine and threonine metabolism
co2[p]	531	103	1.8847	1.1936	0.0737	co2	CO2	C00011	carbon dioxide
co2[e]	530	103	1.8847	1.1936	0.0737	co2	CO2	C00011	carbon dioxide
co2[c]	529	103	1.8847	1.1936	0.0737	co2	CO2	C00011	carbon dioxide
2aobut[c]	114	103	1.8847	1.1936	0.0737	2aobut	L-2-Amino-3-oxobutanoate	C03508	Glycine, serine and threonine metabolism
N1aspmd[c]	287	103	1.8847	1.1936	0.0737	N1aspmd	N1-Acetylspermidine	C00612	polyamine cofactor
asp-L[p]	455	116.5	1.8428	1.2188	0.0851	asp-L	L-Aspartate	C00049	amino acid
2dda7p[c]	116	116.5	1.8428	1.2188	0.0851	2dda7p	2-Dehydro-3-deoxy-D-arabino-heptonate 7-phosphate	C04691	Phenylalanine, tyrosine and tryptophan biosynthesis
asn-L[e]	446	116.5	1.8428	1.2188	0.0851	asn-L	L-Asparagine	C00152	amino acid
asp-L[e]	454	116.5	1.8428	1.2188	0.0851	asp-L	L-Aspartate	C00049	amino acid
aspsa[c]	456	116.5	1.8428	1.2188	0.0851	aspsa	L-Aspartate 4-semialdehyde	C00441	amino acid metabolism
glyc[c]	905	116.5	1.8428	1.2188	0.0851	glyc	Glycerol	C00116	Glycerolipid metabolism
acetol[c]	305	116.5	1.8428	1.2188	0.0851	acetol	Acetol	C05235	Glycine, serine and threonine metabolism
asn-L[p]	447	116.5	1.8428	1.2188	0.0851	asn-L	L-Asparagine	C00152	amino acid
asn-L[c]	445	116.5	1.8428	1.2188	0.0851	asn-L	L-Asparagine	C00152	amino acid
2dr1p[c]	130	116.5	1.8428	1.2188	0.0851	2dr1p	2-Deoxy-D-ribose 1-phosphate	C00672	nucleotide synthesis
2dr5p[c]	131	116.5	1.8428	1.2188	0.0851	2dr5p	2-Deoxy-D-ribose 5-phosphate	C00673	nucleotide synthesis
glyc3p[c]	899	116.5	1.8428	1.2188	0.0851	glyc3p	Glycerol 3-phosphate	C00093	Glycerolipid metabolism
4pasp[c]	252	130.5	1.8395	1.2518	0.0979	4pasp	4-Phospho-L-aspartate	C03082	amino acid metabolism
cys-L[c]	579	130.5	1.8395	1.2518	0.0979	cys-L	L-Cysteine	C00097	amino acid
gar[c]	839	130.5	1.8395	1.2518	0.0979	gar	N1-(5-Phospho-D-ribosyl)glycinamide	C03838	Purine metabolism
glyc[e]	906	130.5	1.8395	1.2518	0.0979	glyc	Glycerol	C00116	Glycerolipid metabolism
eca3und[p]	696	130.5	1.8395	1.2518	0.0979	eca3und	(enterobacterial common antigen)x3 undecaprenyl-diphosphate	0	peptidoglycan synthesis
2obut[c]	144	130.5	1.8395	1.2518	0.0979	2obut	2-Oxobutanoate	C00109	amino acid metabolism, Propanoate metabolism
glyc[p]	907	130.5	1.8395	1.2518	0.0979	glyc	Glycerol	C00116	Glycerolipid metabolism
cgly[c]	503	135	1.8369	1.2613	0.1021	cgly	Cys-Gly	C01419
cys-L[p]	581	145	1.8361	1.2802	0.1113	cys-L	L-Cysteine	C00097
athr-L[c]	458	145	1.8361	1.2802	0.1113	athr-L	L-Allo-threonine	C05519
glyclt[p]	910	145	1.8361	1.2802	0.1113	glyclt	Glycolate	C00160
glyc-R[c]	902	145	1.8361	1.2802	0.1113	glyc-R	(R)-Glycerate	C00258
glyc-R[e]	903	145	1.8361	1.2802	0.1113	glyc-R	(R)-Glycerate	C00258
glyc-R[p]	904	145	1.8361	1.2802	0.1113	glyc-R	(R)-Glycerate	C00258
glyc3p[e]	900	145	1.8361	1.2802	0.1113	glyc3p	Glycerol 3-phosphate	C00093
cbasp[c]	480	145	1.8361	1.2802	0.1113	cbasp	N-Carbamoyl-L-aspartate	C00438
4ampm[c]	241	145	1.8361	1.2802	0.1113	4ampm	4-Amino-2-methyl-5-phosphomethylpyrimidine	C04556
5caiz[c]	261	145	1.8361	1.2802	0.1113	5caiz	5-phosphoribosyl-5-carboxyaminoimidazole	0
cgly[e]	504	145	1.8361	1.2802	0.1113	cgly	Cys-Gly	C01419
cys-L[e]	580	145	1.8361	1.2802	0.1113	cys-L	L-Cysteine	C00097
cgly[p]	505	145	1.8361	1.2802	0.1113	cgly	Cys-Gly	C01419
dhor-S[c]	636	145	1.8361	1.2802	0.1113	dhor-S	(S)-Dihydroorotate	C00337
glyc3p[p]	901	145	1.8361	1.2802	0.1113	glyc3p	Glycerol 3-phosphate	C00093
glyclt[c]	908	145	1.8361	1.2802	0.1113	glyclt	Glycolate	C00160
glyclt[e]	909	145	1.8361	1.2802	0.1113	glyclt	Glycolate	C00160
for[e]	766	166	1.83	1.3106	0.1304	for	Formate	C00058
2mahmp[c]	139	166	1.83	1.3106	0.1304	2mahmp	2-Methyl-4-amino-5-hydroxymethylpyrimidine diphosphate	C04752
cyst-L[c]	582	166	1.83	1.3106	0.1304	cyst-L	L-Cystathionine	C02291
fgam[c]	759	166	1.83	1.3106	0.1304	fgam	N2-Formyl-N1-(5-phospho-D-ribosyl)glycinamide	C04376
air[c]	368	166	1.83	1.3106	0.1304	air	5-amino-1-(5-phospho-D-ribosyl)imidazole	C03373
5aizc[c]	257	166	1.83	1.3106	0.1304	5aizc	5-amino-1-(5-phospho-D-ribosyl)imidazole-4-carboxylate	C04751
gsn[c]	923	166	1.83	1.3106	0.1304	gsn	Guanosine	C00387
ggbutal[c]	856	166	1.83	1.3106	0.1304	ggbutal	gamma-glutamyl-gamma-butyraldehyde	0
fpram[c]	768	166	1.83	1.3106	0.1304	fpram	2-(Formamido)-N1-(5-phospho-D-ribosyl)acetamidine	C04640
for[c]	765	166	1.83	1.3106	0.1304	for	Formate	C00058
for[p]	767	166	1.83	1.3106	0.1304	for	Formate	C00058
dimp[c]	642	204.5	1.8239	1.3634	0.1672	dimp	dIMP	C06196
acg5sa[c]	307	204.5	1.8239	1.3634	0.1672	acg5sa	N-Acetyl-L-glutamate 5-semialdehyde	C01250
frdp[c]	770	204.5	1.8239	1.3634	0.1672	frdp	Farnesyl diphosphate	C00448
acorn[c]	337	204.5	1.8239	1.3634	0.1672	acorn	N2-Acetyl-L-ornithine	C00437
fprica[c]	769	204.5	1.8239	1.3634	0.1672	fprica	5-Formamido-1-(5-phospho-D-ribosyl)imidazole-4-carboxamide	C04734
ggptrc[c]	858	204.5	1.8239	1.3634	0.1672	ggptrc	gamma-glutamyl-putrescine	0
cit[c]	511	204.5	1.8239	1.3634	0.1672	cit	Citrate	C00158
gmp[c]	916	204.5	1.8239	1.3634	0.1672	gmp	GMP	C00144
frulysp[c]	777	204.5	1.8239	1.3634	0.1672	frulysp	fructoselysine Phosphate	0
4abut[p]	236	204.5	1.8239	1.3634	0.1672	4abut	4-Aminobutanoate	C00334
akg[c]	369	204.5	1.8239	1.3634	0.1672	akg	2-Oxoglutarate	C00026
glu-L[e]	883	204.5	1.8239	1.3634	0.1672	glu-L	L-Glutamate	C00025
glu-L[p]	884	204.5	1.8239	1.3634	0.1672	glu-L	L-Glutamate	C00025
g3pg[c]	797	204.5	1.8239	1.3634	0.1672	g3pg	Glycerophosphoglycerol	C03274
1pyr5c[c]	53	204.5	1.8239	1.3634	0.1672	1pyr5c	1-Pyrroline-5-carboxylate	C03912
eca4und[p]	699	204.5	1.8239	1.3634	0.1672	eca4und	(enterobacterial common antigen)x4 undecaprenyl-diphosphate	0
g3pg[e]	798	204.5	1.8239	1.3634	0.1672	g3pg	Glycerophosphoglycerol	C03274
g3pg[p]	799	204.5	1.8239	1.3634	0.1672	g3pg	Glycerophosphoglycerol	C03274
acon-C[c]	334	204.5	1.8239	1.3634	0.1672	acon-C	cis-Aconitate	C00417
acon-T[c]	335	204.5	1.8239	1.3634	0.1672	acon-T	trans-Aconitate	C02341
glx[c]	887	204.5	1.8239	1.3634	0.1672	glx	Glyoxylate	C00048
4abut[c]	234	204.5	1.8239	1.3634	0.1672	4abut	4-Aminobutanoate	C00334
4abut[e]	235	204.5	1.8239	1.3634	0.1672	4abut	4-Aminobutanoate	C00334
dmpp[c]	652	204.5	1.8239	1.3634	0.1672	dmpp	Dimethylallyl diphosphate	C00235
grdp[c]	920	204.5	1.8239	1.3634	0.1672	grdp	Geranyl diphosphate	C00341
acglu[c]	320	204.5	1.8239	1.3634	0.1672	acglu	N-Acetyl-L-glutamate	C00624
glu-D[c]	881	204.5	1.8239	1.3634	0.1672	glu-D	D-Glutamate	C00217
glu-L[c]	882	204.5	1.8239	1.3634	0.1672	glu-L	L-Glutamate	C00025
glu5sa[c]	880	204.5	1.8239	1.3634	0.1672	glu5sa	L-Glutamate 5-semialdehyde	C01165
2mecdp[c]	143	204.5	1.8239	1.3634	0.1672	2mecdp	2-C-methyl-D-erythritol 2,4-cyclodiphosphate	C11453
dump[c]	685	204.5	1.8239	1.3634	0.1672	dump	dUMP	C00365
dudp[c]	684	204.5	1.8239	1.3634	0.1672	dudp	dUDP	C01346
din[c]	645	249	1.8103	1.416	0.2114	din	Deoxyinosine	C05512
acser[c]	338	249	1.8103	1.416	0.2114	acser	O-Acetyl-L-serine	C00979
chor[c]	509	249	1.8103	1.416	0.2114	chor	chorismate	C00251
4abutn[c]	237	249	1.8103	1.416	0.2114	4abutn	4-Aminobutanal	C00555
akg[e]	370	249	1.8103	1.416	0.2114	akg	2-Oxoglutarate	C00026
akg[p]	371	249	1.8103	1.416	0.2114	akg	2-Oxoglutarate	C00026
dadp[c]	591	249	1.8103	1.416	0.2114	dadp	dADP	C00206
damp[c]	592	249	1.8103	1.416	0.2114	damp	dAMP	C00360
duri[c]	688	249	1.8103	1.416	0.2114	duri	Deoxyuridine	C00526
gln-L[c]	874	249	1.8103	1.416	0.2114	gln-L	L-Glutamine	C00064
anhgm[c]	407	249	1.8103	1.416	0.2114	anhgm	N-Acetyl-D-glucosamine(anhydrous)N-Acetylmuramic acid	0
ac[c]	294	249	1.8103	1.416	0.2114	ac	Acetate	C00033
ac[e]	295	249	1.8103	1.416	0.2114	ac	Acetate	C00033
ac[p]	296	249	1.8103	1.416	0.2114	ac	Acetate	C00033
gdp[c]	845	249	1.8103	1.416	0.2114	gdp	GDP	C00035
2h3oppan[c]	132	249	1.8103	1.416	0.2114	2h3oppan	2-Hydroxy-3-oxopropanoate	C01146
25aics[c]	77	249	1.8103	1.416	0.2114	25aics	(S)-2-[5-Amino-1-(5-phospho-D-ribosyl)imidazole-4-carboxamido]succinate	C04823
acg5p[c]	306	249	1.8103	1.416	0.2114	acg5p	N-Acetyl-L-glutamyl 5-phosphate	C04133
acglc-D[c]	319	249	1.8103	1.416	0.2114	acglc-D	6-Acetyl-D-glucose	C02655
dutp[c]	691	249	1.8103	1.416	0.2114	dutp	dUTP	C00460
glu5p[c]	879	249	1.8103	1.416	0.2114	glu5p	L-Glutamate 5-phosphate	C03287
gdpmann[c]	850	294	1.7968	1.4585	0.2571	gdpmann	GDP-D-mannose	C00096
acser[e]	339	294	1.7968	1.4585	0.2571	acser	O-Acetyl-L-serine	C00979
acald[e]	301	294	1.7968	1.4585	0.2571	acald	Acetaldehyde	C00084
acald[p]	302	294	1.7968	1.4585	0.2571	acald	Acetaldehyde	C00084
anhm[c]	412	294	1.7968	1.4585	0.2571	anhm	1,6-anhydrous-N-Acetylmuramate	0
3psme[c]	230	294	1.7968	1.4585	0.2571	3psme	5-O-(1-Carboxyvinyl)-3-phosphoshikimate	C01269
gtspmd[c]	935	294	1.7968	1.4585	0.2571	gtspmd	Glutathionylspermidine	C05730
gdpddman[c]	848	294	1.7968	1.4585	0.2571	gdpddman	GDP-4-dehydro-6-deoxy-D-mannose	C01222
aicar[c]	367	294	1.7968	1.4585	0.2571	aicar	5-Amino-1-(5-Phospho-D-ribosyl)imidazole-4-carboxamide	C04677
cytd[c]	584	294	1.7968	1.4585	0.2571	cytd	Cytidine	C00475
5aop[c]	258	294	1.7968	1.4585	0.2571	5aop	5-Amino-4-oxopentanoate	C00430
cpppg3[c]	549	294	1.7968	1.4585	0.2571	cpppg3	Coproporphyrinogen III	C03263
etha[c]	706	294	1.7968	1.4585	0.2571	etha	Ethanolamine	C00189
gg4abut[c]	854	294	1.7968	1.4585	0.2571	gg4abut	gamma-glutamyl-gamma aminobutyric acid	0
adn[e]	347	294	1.7968	1.4585	0.2571	adn	Adenosine	C00212
cytd[e]	585	294	1.7968	1.4585	0.2571	cytd	Cytidine	C00475
cytd[p]	586	294	1.7968	1.4585	0.2571	cytd	Cytidine	C00475
dgsn[c]	623	294	1.7968	1.4585	0.2571	dgsn	Deoxyguanosine	C00330
actp[c]	342	294	1.7968	1.4585	0.2571	actp	Acetyl phosphate	C00227
g3pe[c]	794	294	1.7968	1.4585	0.2571	g3pe	sn-Glycero-3-phosphoethanolamine	C01233
g3pe[e]	795	294	1.7968	1.4585	0.2571	g3pe	sn-Glycero-3-phosphoethanolamine	C01233
acser[p]	340	294	1.7968	1.4585	0.2571	acser	O-Acetyl-L-serine	C00979
dmlz[c]	651	294	1.7968	1.4585	0.2571	dmlz	6,7-Dimethyl-8-(1-D-ribityl)lumazine	C04332
g3pe[p]	796	294	1.7968	1.4585	0.2571	g3pe	sn-Glycero-3-phosphoethanolamine	C01233
acald[c]	300	294	1.7968	1.4585	0.2571	acald	Acetaldehyde	C00084
gdpofuc[c]	851	294	1.7968	1.4585	0.2571	gdpofuc	GDP-4-oxo-L-fucose	0
glu1sa[c]	878	294	1.7968	1.4585	0.2571	glu1sa	L-Glutamate 1-semialdehyde	C03741
4adcho[c]	239	294	1.7968	1.4585	0.2571	4adcho	4-amino-4-deoxychorismate	C11355
ctp[c]	563	334	1.7758	1.4827	0.2969	ctp	CTP	C00063
dcdp[c]	605	334	1.7758	1.4827	0.2969	dcdp	dCDP	C00705
ckdo[c]	515	334	1.7758	1.4827	0.2969	ckdo	CMP-3-deoxy-D-manno-octulosonate	0
cdp[c]	493	334	1.7758	1.4827	0.2969	cdp	CDP	C00112
adn[p]	348	334	1.7758	1.4827	0.2969	adn	Adenosine	C00212
anhgm[p]	409	334	1.7758	1.4827	0.2969	anhgm	N-Acetyl-D-glucosamine(anhydrous)N-Acetylmuramic acid	0
cmp[c]	526	334	1.7758	1.4827	0.2969	cmp	CMP	C00055
etha[p]	708	334	1.7758	1.4827	0.2969	etha	Ethanolamine	C00189
anhgm[e]	408	334	1.7758	1.4827	0.2969	anhgm	N-Acetyl-D-glucosamine(anhydrous)N-Acetylmuramic acid	0
dgdp[c]	619	334	1.7758	1.4827	0.2969	dgdp	dGDP	C00361
eig3p[c]	700	334	1.7758	1.4827	0.2969	eig3p	D-erythro-1-(Imidazol-4-yl)glycerol 3-phosphate	C04666
dgmp[c]	620	334	1.7758	1.4827	0.2969	dgmp	dGMP	C00362
eca2und[p]	695	334	1.7758	1.4827	0.2969	eca2und	(enterobacterial common antigen)x2 undecaprenyl-diphosphate	0
LalaDglu[c]	285	334	1.7758	1.4827	0.2969	LalaDglu	L-alanine-D-glutamate	0
LalaLglu[c]	286	334	1.7758	1.4827	0.2969	LalaLglu	L-alanine-L-glutamate	0
dcmp[c]	606	334	1.7758	1.4827	0.2969	dcmp	dCMP	C00239
gtp[c]	932	334	1.7758	1.4827	0.2969	gtp	GTP	C00044
adn[c]	346	334	1.7758	1.4827	0.2969	adn	Adenosine	C00212
etha[e]	707	334	1.7758	1.4827	0.2969	etha	Ethanolamine	C00189
csn[c]	557	334	1.7758	1.4827	0.2969	csn	Cytosine	C00380
gdptp[c]	852	334	1.7758	1.4827	0.2969	gdptp	Guanosine 3'-diphosphate 5'-triphosphate	C04494
dctp[c]	609	334	1.7758	1.4827	0.2969	dctp	dCTP	C00458
dcyt[c]	610	334	1.7758	1.4827	0.2969	dcyt	Deoxycytidine	C00881
2dh3dgal6p[c]	123	356	1.7562	1.4944	0.3189	2dh3dgal6p	2-Dehydro-3-deoxy-D-galactonate 6-phosphate	C01286
gly[c]	888	356	1.7562	1.4944	0.3189	gly	Glycine	C00037
alac-S[c]	384	356	1.7562	1.4944	0.3189	alac-S	(S)-2-Acetolactate	C06010
didp[c]	641	374	1.755	1.5104	0.3387	didp	dIDP	C01344
atp[c]	459	374	1.755	1.5104	0.3387	atp	ATP	C00002
dcamp[c]	604	374	1.755	1.5104	0.3387	dcamp	N6-(1,2-Dicarboxyethyl)-AMP	C03794
acanth[c]	303	374	1.755	1.5104	0.3387	acanth	N-Acetylanthranilate	C06332
adp[c]	354	374	1.755	1.5104	0.3387	adp	ADP	C00008
acmum6p[c]	326	374	1.755	1.5104	0.3387	acmum6p	N-acetylmuramate 6-phosphate	0
datp[c]	596	374	1.755	1.5104	0.3387	datp	dATP	C00131
fmnh2[c]	764	374	1.755	1.5104	0.3387	fmnh2	Reduced FMN	0
gdpfuc[c]	849	374	1.755	1.5104	0.3387	gdpfuc	GDP-L-fucose	C00325
adpglc[c]	355	374	1.755	1.5104	0.3387	adpglc	ADPglucose	C00498
camp[c]	479	374	1.755	1.5104	0.3387	camp	cAMP	C00575
4c2me[c]	242	374	1.755	1.5104	0.3387	4c2me	4-(cytidine 5'-diphospho)-2-C-methyl-D-erythritol	C11435
aps[c]	424	374	1.755	1.5104	0.3387	aps	Adenosine 5'-phosphosulfate	C00224
4r5au[c]	256	374	1.755	1.5104	0.3387	4r5au	4-(1-D-Ribitylamino)-5-aminouracil	C04732
amp[c]	400	374	1.755	1.5104	0.3387	amp	AMP	C00020
dgtp[c]	626	374	1.755	1.5104	0.3387	dgtp	dGTP	C00286
dad-2[c]	587	374	1.755	1.5104	0.3387	dad-2	Deoxyadenosine	C00559
ditp[c]	648	374	1.755	1.5104	0.3387	ditp	dITP	C01345
fmn[c]	763	374	1.755	1.5104	0.3387	fmn	FMN	C00061
acgam[c]	316	374	1.755	1.5104	0.3387	acgam	N-Acetyl-D-glucosamine	C00140
dttp[c]	683	374	1.755	1.5104	0.3387	dttp	dTTP	C00459
2dmmq8[c]	128	387	1.7429	1.5118	0.3508	2dmmq8	2-Demethylmenaquinone 8	C05818
acmanap[c]	325	396	1.7357	1.5153	0.3597	acmanap	N-Acetyl-D-mannosamine 6-phosphate	C04257
adphep-DD[c]	356	396	1.7357	1.5153	0.3597	adphep-DD	ADP-D-glycero-D-manno-heptose	C06397
adphep-LD[c]	357	396	1.7357	1.5153	0.3597	adphep-LD	ADP-L-glycero-D-manno-heptose	C06398
5aprbu[c]	259	396	1.7357	1.5153	0.3597	5aprbu	5-Amino-6-(5'-phosphoribitylamino)uracil	C04454
5apru[c]	260	396	1.7357	1.5153	0.3597	5apru	5-Amino-6-(5'-phosphoribosylamino)uracil	C01268
25drapp[c]	79	396	1.7357	1.5153	0.3597	25drapp	2,5-Diamino-6-(ribosylamino)-4-(3H)-pyrimidinone 5'-phosphate	0
fad[c]	719	396	1.7357	1.5153	0.3597	fad	Flavin adenine dinucleotide oxidized	C00016
fadh2[c]	720	396	1.7357	1.5153	0.3597	fadh2	Flavin adenine dinucleotide reduced	C01352
acgam6p[c]	315	396	1.7357	1.5153	0.3597	acgam6p	N-Acetyl-D-glucosamine 6-phosphate	C00357
2p4c2me[c]	155	396	1.7357	1.5153	0.3597	2p4c2me	2-phospho-4-(cytidine 5'-diphospho)-2-C-methyl-D-erythritol	0
3ophb[c]	226	405.5	1.7308	1.5223	0.3701	3ophb	3-Octaprenyl-4-hydroxybenzoate	C05809
2ohph[c]	149	405.5	1.7308	1.5223	0.3701	2ohph	2-Octaprenyl-6-hydroxyphenol	C05811
2oph[c]	154	405.5	1.7308	1.5223	0.3701	2oph	2-Octaprenylphenol	C05810
2dmmql8[c]	129	405.5	1.7308	1.5223	0.3701	2dmmql8	2-Demethylmenaquinol 8	0
dhnpt[c]	635	409	1.7274	1.5187	0.3724	dhnpt	Dihydroneopterin	C04874
dhmptp[c]	633	409	1.7274	1.5187	0.3724	dhmptp	dihydromonapterin-triphosphate	0
ahdt[c]	366	409	1.7274	1.5187	0.3724	ahdt	2-Amino-4-hydroxy-6-(erythro-1,2,3-trihydroxypropyl)dihydropteridine triphosphate	C04895
4mpetz[c]	251	414	1.7237	1.5226	0.3779	4mpetz	4-Methyl-5-(2-phosphoethyl)-thiazole	C04327
2ombzl[c]	150	414	1.7237	1.5226	0.3779	2ombzl	2-Octaprenyl-6-methoxy-1,4-benzoquinol	0
2omhmbl[c]	151	414	1.7237	1.5226	0.3779	2omhmbl	2-Octaprenyl-3-methyl-5-hydroxy-6-methoxy-1,4-benzoquinol	0
2ommbl[c]	152	414	1.7237	1.5226	0.3779	2ommbl	2-Octaprenyl-3-methyl-6-methoxy- 1,4-benzoquinol	0
2omph[c]	153	414	1.7237	1.5226	0.3779	2omph	2-Octaprenyl-6-methoxyphenol	C05812
dhpmp[c]	637	418.5	1.722	1.5294	0.3837	dhpmp	Dihydroneopterin monophosphate	C05925
6hmhpt[c]	273	418.5	1.722	1.5294	0.3837	6hmhpt	6-hydroxymethyl dihydropterin	0
alaala[e]	382	436	1.7166	1.5362	0.4016	alaala	D-Alanyl-D-alanine	C00993
alaala[p]	383	436	1.7166	1.5362	0.4016	alaala	D-Alanyl-D-alanine	C00993
gthox[c]	926	436	1.7166	1.5362	0.4016	gthox	Oxidized glutathione	C00127
2cpr5p[c]	115	436	1.7166	1.5362	0.4016	2cpr5p	1-(2-Carboxyphenylamino)-1-deoxy-D-ribulose 5-phosphate	C01302
3ig3p[c]	206	436	1.7166	1.5362	0.4016	3ig3p	C'-(3-Indolyl)-glycerol 3-phosphate	C03506
3mob[c]	207	436	1.7166	1.5362	0.4016	3mob	3-Methyl-2-oxobutanoate	C00141
ala-L[c]	378	436	1.7166	1.5362	0.4016	ala-L	L-Alanine	C00041
ala-D[e]	376	436	1.7166	1.5362	0.4016	ala-D	D-Alanine	C00133
ala-D[p]	377	436	1.7166	1.5362	0.4016	ala-D	D-Alanine	C00133
3c3hmp[c]	170	436	1.7166	1.5362	0.4016	3c3hmp	3-Carboxy-3-hydroxy-4-methylpentanoate	C02504
2dhp[c]	127	436	1.7166	1.5362	0.4016	2dhp	2-Dehydropantoate	C00966
4hbz[c]	245	436	1.7166	1.5362	0.4016	4hbz	4-Hydroxybenzoate	C00156
gthrd[c]	929	436	1.7166	1.5362	0.4016	gthrd	Reduced glutathione	C00051
gthrd[e]	930	436	1.7166	1.5362	0.4016	gthrd	Reduced glutathione	C00051
6hmhptpp[c]	274	436	1.7166	1.5362	0.4016	6hmhptpp	6-hydroxymethyl-dihydropterin pyrophosphate	0
gthrd[p]	931	436	1.7166	1.5362	0.4016	gthrd	Reduced glutathione	C00051
23ddhb[c]	69	436	1.7166	1.5362	0.4016	23ddhb	2,3-Dihydro-2,3-dihydroxybenzoate	C04171
23dhb[c]	70	436	1.7166	1.5362	0.4016	23dhb	2,3-Dihydroxybenzoate	C00196
23dhmb[c]	74	436	1.7166	1.5362	0.4016	23dhmb	(R)-2,3-Dihydroxy-3-methylbutanoate	C04272
dxyl5p[c]	692	436	1.7166	1.5362	0.4016	dxyl5p	1-deoxy-D-xylulose 5-phosphate	C11437
acgam1p[c]	312	436	1.7166	1.5362	0.4016	acgam1p	N-Acetyl-D-glucosamine 1-phosphate	C04256
dtdp[c]	677	453.5	1.7123	1.5399	0.4187	dtdp	dTDP	C00363
dtmp[c]	680	453.5	1.7123	1.5399	0.4187	dtmp	dTMP	C00364
12dgr160[c]	8	462	1.7116	1.541	0.4268	12dgr160	1,2-Diacyl-sn-glycerol (dihexadecanoyl, n-C16:0)	C00641
12dgr180[c]	12	462	1.7116	1.541	0.4268	12dgr180	1,2-Diacyl-sn-glycerol (dioctadecanoyl, n-C18:0)	C00641
12dgr181[c]	14	462	1.7116	1.541	0.4268	12dgr181	1,2-Diacyl-sn-glycerol (dioctadec-11-enoyl, n-C18:1)	C00641
ddca[c]	615	462	1.7116	1.541	0.4268	ddca	Dodecanoate (n-C12:0)	C02679
dca[c]	600	462	1.7116	1.541	0.4268	dca	Decanoate (n-C10:0)	C01571
dtdprmn[c]	679	472.5	1.7079	1.5421	0.4368	dtdprmn	dTDP-L-rhamnose	C03319
dtdpglu[c]	678	472.5	1.7079	1.5421	0.4368	dtdpglu	dTDPglucose	C00842
dtdp4addg[c]	674	472.5	1.7079	1.5421	0.4368	dtdp4addg	dTDP-4-amino-4,6-dideoxy-D-galactose	C04268
dtdp4d6dg[c]	675	472.5	1.7079	1.5421	0.4368	dtdp4d6dg	dTDP-4-dehydro-6-deoxy-D-glucose	C00687
dtdp4d6dm[c]	676	472.5	1.7079	1.5421	0.4368	dtdp4d6dm	dTDP-4-dehydro-6-deoxy-L-mannose	C00688
ddca[p]	617	484.5	1.7067	1.5461	0.4491	ddca	Dodecanoate (n-C12:0)	C02679
12dgr160[p]	9	484.5	1.7067	1.5461	0.4491	12dgr160	1,2-Diacyl-sn-glycerol (dihexadecanoyl, n-C16:0)	C00641
12dgr161[p]	11	484.5	1.7067	1.5461	0.4491	12dgr161	1,2-Diacyl-sn-glycerol (dihexadec-9-enoyl, n-C16:1)	C00641
12dgr180[p]	13	484.5	1.7067	1.5461	0.4491	12dgr180	1,2-Diacyl-sn-glycerol (dioctadecanoyl, n-C18:0)	C00641
12dgr181[p]	15	484.5	1.7067	1.5461	0.4491	12dgr181	1,2-Diacyl-sn-glycerol (dioctadec-11-enoyl, n-C18:1)	C00641
arg-L[c]	437	499.5	1.6976	1.5473	0.4634	arg-L	L-Arginine	C00062
arg-L[e]	438	499.5	1.6976	1.5473	0.4634	arg-L	L-Arginine	C00062
arg-L[p]	439	499.5	1.6976	1.5473	0.4634	arg-L	L-Arginine	C00062
citr-L[c]	514	499.5	1.6976	1.5473	0.4634	citr-L	L-Citrulline	C00327
3c2hmp[c]	169	499.5	1.6976	1.5473	0.4634	3c2hmp	3-Carboxy-2-hydroxy-4-methylpentanoate	C04411
glucys[c]	885	499.5	1.6976	1.5473	0.4634	glucys	gamma-L-Glutamyl-L-cysteine	C00669
2ippm[c]	137	499.5	1.6976	1.5473	0.4634	2ippm	2-Isopropylmaleate	C02631
5drib[c]	266	499.5	1.6976	1.5473	0.4634	5drib	5'-deoxyribose	0
12dgr120[c]	2	509.5	1.6927	1.5502	0.4735	12dgr120	1,2-Diacyl-sn-glycerol (didodecanoyl, n-C12:0)	C00641
12dgr140[c]	4	509.5	1.6927	1.5502	0.4735	12dgr140	1,2-Diacyl-sn-glycerol (ditetradecanoyl, n-C14:0)	C00641
12dgr141[c]	6	509.5	1.6927	1.5502	0.4735	12dgr141	1,2-Diacyl-sn-glycerol (ditetradec-7-enoyl, n-C14:1)	C00641
12dgr161[c]	10	509.5	1.6927	1.5502	0.4735	12dgr161	1,2-Diacyl-sn-glycerol (dihexadec-9-enoyl, n-C16:1)	C00641
4abz[c]	238	520	1.6869	1.5516	0.4837	4abz	4-Aminobenzoate	C00568
adprib[c]	358	520	1.6869	1.5516	0.4837	adprib	ADPribose	C00301
enter[c]	703	520	1.6869	1.5516	0.4837	enter	Enterochelin	0
enter[e]	704	520	1.6869	1.5516	0.4837	enter	Enterochelin	0
enter[p]	705	520	1.6869	1.5516	0.4837	enter	Enterochelin	0
feenter[c]	750	520	1.6869	1.5516	0.4837	feenter	Fe-enterobactin	C06230
feenter[e]	751	520	1.6869	1.5516	0.4837	feenter	Fe-enterobactin	C06230
feenter[p]	752	520	1.6869	1.5516	0.4837	feenter	Fe-enterobactin	C06230
23dhbzs[c]	72	520	1.6869	1.5516	0.4837	23dhbzs	2,3-dihydroxybenzoylserine	0
eca4colipa[e]	697	528.5	1.682	1.5561	0.493	eca4colipa	(enterobacterial common antigen)x4 core oligosaccharide lipid A	0
eca4colipa[p]	698	528.5	1.682	1.5561	0.493	eca4colipa	(enterobacterial common antigen)x4 core oligosaccharide lipid A	0
argsuc[c]	440	548.5	1.6788	1.5547	0.5112	argsuc	N(omega)-(L-Arginino)succinate	C03406
alaala[c]	381	548.5	1.6788	1.5547	0.5112	alaala	D-Alanyl-D-alanine	C00993
agm[e]	363	548.5	1.6788	1.5547	0.5112	agm	Agmatine	C00179
1hdecg3p[c]	47	548.5	1.6788	1.5547	0.5112	1hdecg3p	1-hexadecanoyl-sn-glycerol 3-phosphate	C00681
4mop[c]	250	548.5	1.6788	1.5547	0.5112	4mop	4-Methyl-2-oxopentanoate	C00233
apg180[c]	421	548.5	1.6788	1.5547	0.5112	apg180	acyl phosphatidylglycerol (n-C18:0)	0
agm[c]	362	548.5	1.6788	1.5547	0.5112	agm	Agmatine	C00179
3c4mop[c]	171	548.5	1.6788	1.5547	0.5112	3c4mop	3-Carboxy-4-methyl-2-oxopentanoate	C04236
enlipa[p]	702	548.5	1.6788	1.5547	0.5112	enlipa	phosphoethanolamine KDO(2)-lipid (A)	0
12dgr120[p]	3	548.5	1.6788	1.5547	0.5112	12dgr120	1,2-Diacyl-sn-glycerol (didodecanoyl, n-C12:0)	C00641
12dgr140[p]	5	548.5	1.6788	1.5547	0.5112	12dgr140	1,2-Diacyl-sn-glycerol (ditetradecanoyl, n-C14:0)	C00641
12dgr141[p]	7	548.5	1.6788	1.5547	0.5112	12dgr141	1,2-Diacyl-sn-glycerol (ditetradec-7-enoyl, n-C14:1)	C00641
1ddecg3p[c]	43	548.5	1.6788	1.5547	0.5112	1ddecg3p	1-dodecanoyl-sn-glycerol 3-phosphate	C00681
1hdec9eg3p[c]	45	548.5	1.6788	1.5547	0.5112	1hdec9eg3p	1-hexadec-9-enoyl-sn-glycerol 3-phosphate	0
1tdecg3p[c]	56	548.5	1.6788	1.5547	0.5112	1tdecg3p	1-tetradecanoyl-sn-glycerol 3-phosphate	C00681
apg181[c]	422	548.5	1.6788	1.5547	0.5112	apg181	acyl phosphatidylglycerol (n-C18:1)	0
enlipa[e]	701	548.5	1.6788	1.5547	0.5112	enlipa	phosphoethanolamine KDO(2)-lipid (A)	0
1odec11eg3p[c]	49	548.5	1.6788	1.5547	0.5112	1odec11eg3p	1-octadec-11-enoyl-sn-glycerol 3-phosphate	0
1odecg3p[c]	51	548.5	1.6788	1.5547	0.5112	1odecg3p	1-octadecanoyl-sn-glycerol 3-phosphate	C00681
23dhdp[c]	73	548.5	1.6788	1.5547	0.5112	23dhdp	2,3-Dihydrodipicolinate	C03340
agm[p]	364	548.5	1.6788	1.5547	0.5112	agm	Agmatine	C00179
1tdec7eg3p[c]	54	548.5	1.6788	1.5547	0.5112	1tdec7eg3p	1-tetradec-7-enoyl-sn-glycerol 3-phosphate	C00681
ala-D[c]	375	548.5	1.6788	1.5547	0.5112	ala-D	D-Alanine	C00133
clpn160[p]	522	588.5	1.6682	1.5539	0.5482	clpn160	cardiolipin (tetrahexadecanoyl, n-C16:0)	C05980
clpn140[p]	520	588.5	1.6682	1.5539	0.5482	clpn140	cardiolipin (tetratetradecanoyl, n-C14:0)	C05980
clpn141[p]	521	588.5	1.6682	1.5539	0.5482	clpn141	cardiolipin (tetratetradec-7-enoyl, n-C14:1)	C05980
clpn181[p]	525	588.5	1.6682	1.5539	0.5482	clpn181	cardiolipin (tetraoctadec-11-enoyl, n-C18:1)	C05980
apg161[c]	420	588.5	1.6682	1.5539	0.5482	apg161	acyl phosphatidylglycerol (n-C16:1)	0
clpn161[p]	523	588.5	1.6682	1.5539	0.5482	clpn161	cardiolipin (tetrahexadec-9-enoyl, n-C16:1)	C05980
clpn180[p]	524	588.5	1.6682	1.5539	0.5482	clpn180	cardiolipin (tetraoctadecanoyl, n-C18:0)	C05980
2tdecg3p[p]	162	588.5	1.6682	1.5539	0.5482	2tdecg3p	2-tetradecanoyl-sn-glycerol 3-phosphate	C03974
1odecg3p[p]	52	588.5	1.6682	1.5539	0.5482	1odecg3p	1-octadecanoyl-sn-glycerol 3-phosphate	C00681
1tdecg3p[p]	57	588.5	1.6682	1.5539	0.5482	1tdecg3p	1-tetradecanoyl-sn-glycerol 3-phosphate	C00681
2hdecg3p[p]	136	588.5	1.6682	1.5539	0.5482	2hdecg3p	2-hexadecanoyl-sn-glycerol 3-phosphate	C03974
1tdec7eg3p[p]	55	588.5	1.6682	1.5539	0.5482	1tdec7eg3p	1-tetradec-7-enoyl-sn-glycerol 3-phosphate	C00681
apg160[c]	419	588.5	1.6682	1.5539	0.5482	apg160	acyl phosphatidylglycerol (n-C16:0)	0
1hdecg3p[p]	48	588.5	1.6682	1.5539	0.5482	1hdecg3p	1-hexadecanoyl-sn-glycerol 3-phosphate	C00681
1odec11eg3p[p]	50	588.5	1.6682	1.5539	0.5482	1odec11eg3p	1-octadec-11-enoyl-sn-glycerol 3-phosphate	0
1ddecg3p[p]	44	588.5	1.6682	1.5539	0.5482	1ddecg3p	1-dodecanoyl-sn-glycerol 3-phosphate	C00681
1hdec9eg3p[p]	46	588.5	1.6682	1.5539	0.5482	1hdec9eg3p	1-hexadec-9-enoyl-sn-glycerol 3-phosphate	0
2ddecg3p[c]	117	588.5	1.6682	1.5539	0.5482	2ddecg3p	2-dodecanoyl-sn-glycerol 3-phosphate	C03974
2ddecg3p[p]	118	588.5	1.6682	1.5539	0.5482	2ddecg3p	2-dodecanoyl-sn-glycerol 3-phosphate	C03974
2hdec9eg3p[c]	133	588.5	1.6682	1.5539	0.5482	2hdec9eg3p	2-hexadec-9-enoyl-sn-glycerol 3-phosphate	C03974
26dap-LL[c]	80	588.5	1.6682	1.5539	0.5482	26dap-LL	LL-2,6-Diaminoheptanedioate	C00666
26dap-M[c]	81	588.5	1.6682	1.5539	0.5482	26dap-M	meso-2,6-Diaminoheptanedioate	C00680
15dap[c]	26	588.5	1.6682	1.5539	0.5482	15dap	1,5-Diaminopentane	C01672
15dap[e]	27	588.5	1.6682	1.5539	0.5482	15dap	1,5-Diaminopentane	C01672
15dap[p]	28	588.5	1.6682	1.5539	0.5482	15dap	1,5-Diaminopentane	C01672
2hdec9eg3p[p]	134	588.5	1.6682	1.5539	0.5482	2hdec9eg3p	2-hexadec-9-enoyl-sn-glycerol 3-phosphate	C03974
2tdec7eg3p[p]	160	588.5	1.6682	1.5539	0.5482	2tdec7eg3p	2-tetradec-7-enoyl-sn-glycerol 3-phosphate	C03974
2tdecg3p[c]	161	588.5	1.6682	1.5539	0.5482	2tdecg3p	2-tetradecanoyl-sn-glycerol 3-phosphate	C03974
2me4p[c]	142	588.5	1.6682	1.5539	0.5482	2me4p	2-C-methyl-D-erythritol 4-phosphate	C11434
2odec11eg3p[p]	146	588.5	1.6682	1.5539	0.5482	2odec11eg3p	2-octadec-11-enoyl-sn-glycerol 3-phosphate	C03974
2hdecg3p[c]	135	588.5	1.6682	1.5539	0.5482	2hdecg3p	2-hexadecanoyl-sn-glycerol 3-phosphate	C03974
2odec11eg3p[c]	145	588.5	1.6682	1.5539	0.5482	2odec11eg3p	2-octadec-11-enoyl-sn-glycerol 3-phosphate	C03974
2odecg3p[c]	147	588.5	1.6682	1.5539	0.5482	2odecg3p	2-octadecanoyl-sn-glycerol 3-phosphate	C03974
2odecg3p[p]	148	588.5	1.6682	1.5539	0.5482	2odecg3p	2-octadecanoyl-sn-glycerol 3-phosphate	C03974
2tdec7eg3p[c]	159	588.5	1.6682	1.5539	0.5482	2tdec7eg3p	2-tetradec-7-enoyl-sn-glycerol 3-phosphate	C03974
dscl[c]	671	588.5	1.6682	1.5539	0.5482	dscl	dihydrosirohydrochlorin	C02463
2ahbut[c]	112	634	1.6576	1.5515	0.5897	2ahbut	(S)-2-Aceto-2-hydroxybutanoate	C06006
LalaDgluMdap[c]	282	634	1.6576	1.5515	0.5897	LalaDgluMdap	L-alanine-D-glutamate-meso-2,6-diaminoheptanedioate	0
aconm[c]	336	634	1.6576	1.5515	0.5897	aconm	E-3-carboxy-2-pentenedioate 6-methyl ester	0
LalaDgluMdap[e]	283	634	1.6576	1.5515	0.5897	LalaDgluMdap	L-alanine-D-glutamate-meso-2,6-diaminoheptanedioate	0
LalaDgluMdap[p]	284	634	1.6576	1.5515	0.5897	LalaDgluMdap	L-alanine-D-glutamate-meso-2,6-diaminoheptanedioate	0
dhpt[c]	639	634	1.6576	1.5515	0.5897	dhpt	Dihydropteroate	C00921
clpn120[p]	519	677	1.6509	1.5426	0.6261	clpn120	cardiolipin (tetradodecanoyl, n-C12:0)	C05980
dhf[c]	632	677	1.6509	1.5426	0.6261	dhf	7,8-Dihydrofolate	C00415
2agpg120[c]	98	677	1.6509	1.5426	0.6261	2agpg120	2-Acyl-sn-glycero-3-phosphoglycerol (n-C12:0)	0
cpg180[c]	542	677	1.6509	1.5426	0.6261	cpg180	cyclopropane phosphatidylglycerol (dioctadec-11,12-cyclo-anoyl, n-C18:0 cyclo)	0
2agpg141[p]	103	677	1.6509	1.5426	0.6261	2agpg141	2-Acyl-sn-glycero-3-phosphoglycerol (n-C14:1)	0
2agpg160[c]	104	677	1.6509	1.5426	0.6261	2agpg160	2-Acyl-sn-glycero-3-phosphoglycerol (n-C16:0)	0
apg140[c]	417	677	1.6509	1.5426	0.6261	apg140	acyl phosphatidylglycerol (n-C14:0)	0
2agpg181[p]	111	677	1.6509	1.5426	0.6261	2agpg181	2-Acyl-sn-glycero-3-phosphoglycerol (n-C18:1)	0
2agpg160[p]	105	677	1.6509	1.5426	0.6261	2agpg160	2-Acyl-sn-glycero-3-phosphoglycerol (n-C16:0)	0
anth[c]	413	677	1.6509	1.5426	0.6261	anth	Anthranilate	C00108
gua[e]	937	677	1.6509	1.5426	0.6261	gua	Guanine	C00242
3mop[c]	208	677	1.6509	1.5426	0.6261	3mop	(S)-3-Methyl-2-oxopentanoate	C00671
apg120[c]	416	677	1.6509	1.5426	0.6261	apg120	acyl phosphatidylglycerol (n-C12:0)	0
2agpg120[p]	99	677	1.6509	1.5426	0.6261	2agpg120	2-Acyl-sn-glycero-3-phosphoglycerol (n-C12:0)	0
2agpg140[p]	101	677	1.6509	1.5426	0.6261	2agpg140	2-Acyl-sn-glycero-3-phosphoglycerol (n-C14:0)	0
2agpg141[c]	102	677	1.6509	1.5426	0.6261	2agpg141	2-Acyl-sn-glycero-3-phosphoglycerol (n-C14:1)	0
2agpg140[c]	100	677	1.6509	1.5426	0.6261	2agpg140	2-Acyl-sn-glycero-3-phosphoglycerol (n-C14:0)	0
2agpg181[c]	110	677	1.6509	1.5426	0.6261	2agpg181	2-Acyl-sn-glycero-3-phosphoglycerol (n-C18:1)	0
apg141[c]	418	677	1.6509	1.5426	0.6261	apg141	acyl phosphatidylglycerol (n-C14:1)	0
1agpg140[p]	37	677	1.6509	1.5426	0.6261	1agpg140	1-Acyl-sn-glycero-3-phosphoglycerol (n-C14:0)	0
1agpg160[p]	39	677	1.6509	1.5426	0.6261	1agpg160	1-Acyl-sn-glycero-3-phosphoglycerol (n-C16:0)	0
1agpg180[p]	41	677	1.6509	1.5426	0.6261	1agpg180	1-Acyl-sn-glycero-3-phosphoglycerol (n-C18:0)	0
1agpg141[p]	38	677	1.6509	1.5426	0.6261	1agpg141	1-Acyl-sn-glycero-3-phosphoglycerol (n-C14:1)	0
1agpg161[p]	40	677	1.6509	1.5426	0.6261	1agpg161	1-Acyl-sn-glycero-3-phosphoglycerol (n-C16:1)	0
1agpg181[p]	42	677	1.6509	1.5426	0.6261	1agpg181	1-Acyl-sn-glycero-3-phosphoglycerol (n-C18:1)	0
2agpg161[c]	106	677	1.6509	1.5426	0.6261	2agpg161	2-Acyl-sn-glycero-3-phosphoglycerol (n-C16:1)	0
2agpg161[p]	107	677	1.6509	1.5426	0.6261	2agpg161	2-Acyl-sn-glycero-3-phosphoglycerol (n-C16:1)	0
2agpg180[c]	108	677	1.6509	1.5426	0.6261	2agpg180	2-Acyl-sn-glycero-3-phosphoglycerol (n-C18:0)	0
2agpg180[p]	109	677	1.6509	1.5426	0.6261	2agpg180	2-Acyl-sn-glycero-3-phosphoglycerol (n-C18:0)	0
1agpg120[p]	36	677	1.6509	1.5426	0.6261	1agpg120	1-Acyl-sn-glycero-3-phosphoglycerol (n-C12:0)	0
glyald[c]	891	677	1.6509	1.5426	0.6261	glyald	D-Glyceraldehyde	C00577
23dhmp[c]	75	677	1.6509	1.5426	0.6261	23dhmp	(R)-2,3-Dihydroxy-3-methylpentanoate	C06007
gicolipa[c]	859	706.5	1.6501	1.5365	0.6508	gicolipa	glucosyl-inner core oligosaccharide lipid A	0
alltt[c]	393	706.5	1.6501	1.5365	0.6508	alltt	Allantoate	C00499
colipa[e]	537	706.5	1.6501	1.5365	0.6508	colipa	core oligosaccharide lipid A	0
colipa[p]	538	706.5	1.6501	1.5365	0.6508	colipa	core oligosaccharide lipid A	0
dad-5[c]	590	706.5	1.6501	1.5365	0.6508	dad-5	5'-Deoxyadenosine	C05198
gagicolipa[c]	809	706.5	1.6501	1.5365	0.6508	gagicolipa	galactosyl-glucosyl-inner core oligosaccharide lipid A	0
gggagicolipa[c]	857	706.5	1.6501	1.5365	0.6508	gggagicolipa	glucosyl-glucosyl-galactosyl-glucosyl-inner core oligosaccharide lipid A	0
ggagicolipa[c]	855	706.5	1.6501	1.5365	0.6508	ggagicolipa	glucosyl-galactosyl-glucosyl-inner core oligosaccharide lipid A	0
colipa[c]	536	706.5	1.6501	1.5365	0.6508	colipa	core oligosaccharide lipid A	0
gua[p]	938	738	1.6442	1.5285	0.6763	gua	Guanine	C00242
gua[c]	936	738	1.6442	1.5285	0.6763	gua	Guanine	C00242
anhgm3p[c]	403	738	1.6442	1.5285	0.6763	anhgm3p	N-Acetyl-D-glucosamine(anhydrous)N-Acetylmuramyl-tripeptide	0
anhgm3p[p]	404	738	1.6442	1.5285	0.6763	anhgm3p	N-Acetyl-D-glucosamine(anhydrous)N-Acetylmuramyl-tripeptide	0
glyald[e]	892	738	1.6442	1.5285	0.6763	glyald	D-Glyceraldehyde	C00577
glyald[p]	893	738	1.6442	1.5285	0.6763	glyald	D-Glyceraldehyde	C00577
10fthf[c]	1	738	1.6442	1.5285	0.6763	10fthf	10-Formyltetrahydrofolate	C00234
dnad[c]	659	738	1.6442	1.5285	0.6763	dnad	Deamino-NAD+	C00857
5mthf[c]	270	738	1.6442	1.5285	0.6763	5mthf	5-Methyltetrahydrofolate	C00440
dtdp4aaddg[c]	673	738	1.6442	1.5285	0.6763	dtdp4aaddg	dTDP-4-acetamido-4,6-dideoxy-D-galactose	0
b2coa[c]	460	783	1.6434	1.5136	0.7105	b2coa	Crotonoyl-CoA	C00877
3hhcoa[c]	193	783	1.6434	1.5136	0.7105	3hhcoa	(S)-3-Hydroxyhexanoyl-CoA	C05268
cpe180[c]	540	783	1.6434	1.5136	0.7105	cpe180	cyclopropane phosphatidylethanolamine (dioctadec-11,12-cyclo-anoyl, n-C18:0 cyclo)	0
cpg160[c]	541	783	1.6434	1.5136	0.7105	cpg160	cyclopropane phosphatidylglycerol (dihexadec-9,10-cyclo-anoyl, n-C16:0 cyclo)	0
2agpe161[p]	93	783	1.6434	1.5136	0.7105	2agpe161	2-Acyl-sn-glycero-3-phosphoethanolamine (n-C16:1)	C05973
2agpe180[p]	95	783	1.6434	1.5136	0.7105	2agpe180	2-Acyl-sn-glycero-3-phosphoethanolamine (n-C18:0)	C05973
anhm3p[c]	410	783	1.6434	1.5136	0.7105	anhm3p	1,6-anhydrous-N-Acetylmuramyl-tripeptide	0
btcoa[c]	465	783	1.6434	1.5136	0.7105	btcoa	Butanoyl-CoA	C00136
4ppan[c]	254	783	1.6434	1.5136	0.7105	4ppan	D-4'-Phosphopantothenate	C03492
3hbcoa[c]	181	783	1.6434	1.5136	0.7105	3hbcoa	(S)-3-Hydroxybutanoyl-CoA	C01144
LalaDgluMdapDala[c]	279	783	1.6434	1.5136	0.7105	LalaDgluMdapDala	L-alanine-D-glutamate-meso-2,6-diaminoheptanedioate-D-alanine	0
3ohcoa[c]	217	783	1.6434	1.5136	0.7105	3ohcoa	3-Oxohexanoyl-CoA	C05269
2agpe180[c]	94	783	1.6434	1.5136	0.7105	2agpe180	2-Acyl-sn-glycero-3-phosphoethanolamine (n-C18:0)	C05973
2agpe181[c]	96	783	1.6434	1.5136	0.7105	2agpe181	2-Acyl-sn-glycero-3-phosphoethanolamine (n-C18:1)	C05973
2agpe181[p]	97	783	1.6434	1.5136	0.7105	2agpe181	2-Acyl-sn-glycero-3-phosphoethanolamine (n-C18:1)	C05973
2agpe160[p]	91	783	1.6434	1.5136	0.7105	2agpe160	2-Acyl-sn-glycero-3-phosphoethanolamine (n-C16:0)	C05973
1agpe140[p]	30	783	1.6434	1.5136	0.7105	1agpe140	1-Acyl-sn-glycero-3-phosphoethanolamine (n-C14:0)	C04438
1agpe141[p]	31	783	1.6434	1.5136	0.7105	1agpe141	1-Acyl-sn-glycero-3-phosphoethanolamine (n-C14:1)	C04438
1agpe160[p]	32	783	1.6434	1.5136	0.7105	1agpe160	1-Acyl-sn-glycero-3-phosphoethanolamine (n-C16:0)	C04438
1agpe161[p]	33	783	1.6434	1.5136	0.7105	1agpe161	1-Acyl-sn-glycero-3-phosphoethanolamine (n-C16:1)	C04438
1agpe180[p]	34	783	1.6434	1.5136	0.7105	1agpe180	1-Acyl-sn-glycero-3-phosphoethanolamine (n-C18:0)	C04438
1agpe181[p]	35	783	1.6434	1.5136	0.7105	1agpe181	1-Acyl-sn-glycero-3-phosphoethanolamine (n-C18:1)	C04438
2agpe120[c]	84	783	1.6434	1.5136	0.7105	2agpe120	2-Acyl-sn-glycero-3-phosphoethanolamine (n-C12:0)	C05973
2agpe120[p]	85	783	1.6434	1.5136	0.7105	2agpe120	2-Acyl-sn-glycero-3-phosphoethanolamine (n-C12:0)	C05973
2agpe140[c]	86	783	1.6434	1.5136	0.7105	2agpe140	2-Acyl-sn-glycero-3-phosphoethanolamine (n-C14:0)	C05973
2agpe140[p]	87	783	1.6434	1.5136	0.7105	2agpe140	2-Acyl-sn-glycero-3-phosphoethanolamine (n-C14:0)	C05973
2agpe141[c]	88	783	1.6434	1.5136	0.7105	2agpe141	2-Acyl-sn-glycero-3-phosphoethanolamine (n-C14:1)	C05973
2agpe141[p]	89	783	1.6434	1.5136	0.7105	2agpe141	2-Acyl-sn-glycero-3-phosphoethanolamine (n-C14:1)	C05973
2agpe160[c]	90	783	1.6434	1.5136	0.7105	2agpe160	2-Acyl-sn-glycero-3-phosphoethanolamine (n-C16:0)	C05973
1agpe120[p]	29	783	1.6434	1.5136	0.7105	1agpe120	1-Acyl-sn-glycero-3-phosphoethanolamine (n-C12:0)	C04438
LalaDgluMdapDala[e]	280	783	1.6434	1.5136	0.7105	LalaDgluMdapDala	L-alanine-D-glutamate-meso-2,6-diaminoheptanedioate-D-alanine	0
2agpe161[c]	92	783	1.6434	1.5136	0.7105	2agpe161	2-Acyl-sn-glycero-3-phosphoethanolamine (n-C16:1)	C05973
LalaDgluMdapDala[p]	281	783	1.6434	1.5136	0.7105	LalaDgluMdapDala	L-alanine-D-glutamate-meso-2,6-diaminoheptanedioate-D-alanine	0
alltn[e]	391	822	1.6427	1.4972	0.7378	alltn	Allantoin	C01551
2amsa[c]	113	822	1.6427	1.4972	0.7378	2amsa	2-Aminomalonate semialdehyde	C11822
2tpr3dpcoa[c]	163	822	1.6427	1.4972	0.7378	2tpr3dpcoa	2'-(5''-triphosphoribosyl)-3'-dephospho-CoA	0
3pg[c]	228	822	1.6427	1.4972	0.7378	3pg	3-Phospho-D-glycerate	C00197
dpcoa[c]	662	822	1.6427	1.4972	0.7378	dpcoa	Dephospho-CoA	C00882
3php[c]	229	822	1.6427	1.4972	0.7378	3php	3-Phosphohydroxypyruvate	C03232
alltn[p]	392	822	1.6427	1.4972	0.7378	alltn	Allantoin	C01551
alltn[c]	390	822	1.6427	1.4972	0.7378	alltn	Allantoin	C01551
ade[c]	343	822	1.6427	1.4972	0.7378	ade	Adenine	C00147
coa[c]	532	822	1.6427	1.4972	0.7378	coa	Coenzyme A	C00010
ade[p]	345	822	1.6427	1.4972	0.7378	ade	Adenine	C00147
ade[e]	344	822	1.6427	1.4972	0.7378	ade	Adenine	C00147
2pg[c]	156	822	1.6427	1.4972	0.7378	2pg	D-Glycerate 2-phosphate	C00631
4ppcys[c]	255	842	1.6325	1.4877	0.751	4ppcys	N-((R)-4-Phosphopantothenoyl)-L-cysteine	C04352
asp-L[c]	453	854.5	1.6151	1.4819	0.7592	asp-L	L-Aspartate	C00049
cdpdhdecg[c]	496	854.5	1.6151	1.4819	0.7592	cdpdhdecg	CDP-1,2-dihexadecanoylglycerol	C00269
cdpdodec11eg[c]	497	854.5	1.6151	1.4819	0.7592	cdpdodec11eg	CDP-1,2-dioctadec-11-enoylglycerol	C00269
cdpdodecg[c]	498	854.5	1.6151	1.4819	0.7592	cdpdodecg	CDP-1,2-dioctadecanoylglycerol	C00269
cdpdtdec7eg[c]	499	854.5	1.6151	1.4819	0.7592	cdpdtdec7eg	CDP-1,2-ditetradec-7-enoylglycerol	C00269
cdpdtdecg[c]	500	854.5	1.6151	1.4819	0.7592	cdpdtdecg	CDP-1,2-ditetradecanoylglycerol	C00269
cdpdhdec9eg[c]	495	854.5	1.6151	1.4819	0.7592	cdpdhdec9eg	CDP-1,2-dihexadec-9-enoylglycerol	C00269
cdpdddecg[c]	494	854.5	1.6151	1.4819	0.7592	cdpdddecg	CDP-1,2-didodecanoylglycerol	C00269
cpe160[c]	539	854.5	1.6151	1.4819	0.7592	cpe160	cyclopropane phosphatidylethanolamine (dihexadec-9,10-cyclo-anoyl, n-C16:0 cyclo)	0
anhgm4p[c]	405	854.5	1.6151	1.4819	0.7592	anhgm4p	N-Acetyl-D-glucosamine(anhydrous)N-Acetylmuramyl-tetrapeptide	0
ahcys[c]	365	854.5	1.6151	1.4819	0.7592	ahcys	S-Adenosyl-L-homocysteine	C00021
anhgm4p[p]	406	854.5	1.6151	1.4819	0.7592	anhgm4p	N-Acetyl-D-glucosamine(anhydrous)N-Acetylmuramyl-tetrapeptide	0
ametam[c]	398	854.5	1.6151	1.4819	0.7592	ametam	S-Adenosylmethioninamine	C01137
dc2coa[c]	598	867	1.6051	1.4753	0.7668	dc2coa	trans-Dec-2-enoyl-CoA	C05275
3odcoa[c]	213	867	1.6051	1.4753	0.7668	3odcoa	3-Oxodecanoyl-CoA	C05265
accoa[c]	304	867	1.6051	1.4753	0.7668	accoa	Acetyl-CoA	C00024
3oocoa[c]	221	867	1.6051	1.4753	0.7668	3oocoa	3-Oxooctanoyl-CoA	C05267
3hocoa[c]	197	867	1.6051	1.4753	0.7668	3hocoa	(S)-3-Hydroxyoctanoyl-CoA	C05266
3hdcoa[c]	189	867	1.6051	1.4753	0.7668	3hdcoa	(S)-3-Hydroxydecanoyl-CoA	C05264
amet[c]	397	878	1.5879	1.47	0.7738	amet	S-Adenosyl-L-methionine	C00019
anhm4p[c]	411	878	1.5879	1.47	0.7738	anhm4p	1,6-anhydrous-N-Acetylmuramyl-tetrapeptide	0
acolipa[e]	332	878	1.5879	1.47	0.7738	acolipa	4-Amino-4-deoxy-L-arabinose modified core oligosaccharide lipid A	0
acolipa[p]	333	878	1.5879	1.47	0.7738	acolipa	4-Amino-4-deoxy-L-arabinose modified core oligosaccharide lipid A	0
4hthr[c]	248	878	1.5879	1.47	0.7738	4hthr	4-Hydroxy-L-threonine	C06056
ala-B[c]	372	878	1.5879	1.47	0.7738	ala-B	beta-Alanine	C00099
34hpp[c]	166	890.5	1.5711	1.4633	0.7812	34hpp	3-(4-Hydroxyphenyl)pyruvate	C01179
aacoa[c]	291	890.5	1.5711	1.4633	0.7812	aacoa	Acetoacetyl-CoA	C00332
2shchc[c]	158	890.5	1.5711	1.4633	0.7812	2shchc	2-Succinyl-6-hydroxy-2,4-cyclohexadiene-1-carboxylate	C05817
dhna[c]	634	890.5	1.5711	1.4633	0.7812	dhna	1,4-Dihydroxy-2-naphthoate	C03657
3oddcoa[c]	214	897.5	1.5544	1.4597	0.7854	3oddcoa	3-Oxododecanoyl-CoA	C05263
3hddcoa[c]	190	897.5	1.5544	1.4597	0.7854	3hddcoa	(S)-3-Hydroxydodecanoyl-CoA	C05262
dcacoa[c]	603	897.5	1.5544	1.4597	0.7854	dcacoa	Decanoyl-CoA (n-C10:0CoA)	C05274
dd2coa[c]	613	897.5	1.5544	1.4597	0.7854	dd2coa	trans-Dodec-2-enoyl-CoA	C03221
23dhba[c]	71	904	1.5467	1.4561	0.7891	23dhba	(2,3-Dihydroxybenzoyl)adenylate	C04030
3htdcoa[c]	205	914.5	1.5391	1.4503	0.7951	3htdcoa	(S)-3-Hydroxytetradecanoyl-CoA	C05260
3hodcoa[c]	200	914.5	1.5391	1.4503	0.7951	3hodcoa	(S)-3-Hydroxyoctadecanoyl-CoA	0
3ohdcoa[c]	218	914.5	1.5391	1.4503	0.7951	3ohdcoa	3-Oxohexadecanoyl-CoA	C05259
ddcacoa[c]	618	914.5	1.5391	1.4503	0.7951	ddcacoa	Dodecanoyl-CoA (n-C12:0CoA)	C01832
3otdcoa[c]	227	914.5	1.5391	1.4503	0.7951	3otdcoa	3-Oxotetradecanoyl-CoA	C05261
3hhdcoa[c]	194	914.5	1.5391	1.4503	0.7951	3hhdcoa	(S)-3-Hydroxyhexadecanoyl-CoA	C05258
3oodcoa[c]	224	914.5	1.5391	1.4503	0.7951	3oodcoa	3-Oxooctadecanoyl-CoA	0
etoh[c]	712	927	1.4763	1.4431	0.802	etoh	Ethanol	C00469
etoh[e]	713	927	1.4763	1.4431	0.802	etoh	Ethanol	C00469
etoh[p]	714	927	1.4763	1.4431	0.802	etoh	Ethanol	C00469
fe3[e]	731	929.5	1.4019	1.4416	0.8033	fe3	Fe3+	0
fe3[p]	732	929.5	1.4019	1.4416	0.8033	fe3	Fe3+	0
adocbl[c]	351	938	1.2999	1.4367	0.8079	adocbl	Adenosylcobalamin	C00194
cbl1[c]	484	939.5	1.2742	1.4358	0.8087	cbl1	Cob(I)alamin	C00853
cbl1[p]	486	939.5	1.2742	1.4358	0.8087	cbl1	Cob(I)alamin	C00853
cd2[c]	488	NA	NA	1.2106	0.8093	cd2	Cadmium	C01413
cd2[e]	489	NA	NA	1.2096	0.8093	cd2	Cadmium	C01413
cpgn-un[c]	546	NA	NA	1.1851	0.8093	cpgn-un	coprogen unloaded (no Fe(III))	0
cd2[p]	490	NA	NA	1.2085	0.8093	cd2	Cadmium	C01413
gam6p[e]	835	NA	NA	1.0368	0.8093	gam6p	D-Glucosamine 6-phosphate	C00352
gln-L[p]	876	NA	NA	1.0203	0.8093	gln-L	L-Glutamine	C00064
ala-L[p]	380	NA	NA	1.2723	0.8093	ala-L	L-Alanine	C00041
but[e]	471	NA	NA	1.2238	0.8093	but	Butyrate (n-C4:0)	C00246
dcyt[e]	611	NA	NA	1.144	0.8093	dcyt	Deoxycytidine	C00881
frulys[e]	775	NA	NA	1.0713	0.8093	frulys	fructoselysine	0
fruur[c]	778	NA	NA	1.0696	0.8093	fruur	D-Fructuronate	C00905
12ppd-S[c]	19	NA	NA	1.4345	0.8093	12ppd-S	(S)-Propane-1,2-diol	C02917
arbtn-fe3[c]	433	NA	NA	1.2487	0.8093	arbtn-fe3	Aerobactin	C05554
arbtn[p]	436	NA	NA	1.2453	0.8093	arbtn	aerobactin minus Fe3	0
bbtcoa[c]	461	NA	NA	1.2328	0.8093	bbtcoa	gamma-butyrobetainyl-CoA	0
but2eACP[c]	468	NA	NA	1.2272	0.8093	but2eACP	But-2-enoyl-[acyl-carrier protein]	C04246
but[c]	470	NA	NA	1.2249	0.8093	but	Butyrate (n-C4:0)	C00246
dhcinnm[c]	631	NA	NA	1.1363	0.8093	dhcinnm	2,3-dihydroxicinnamic acid	0
galctn-D[c]	821	NA	NA	1.0464	0.8093	galctn-D	D-Galactonate	C00880
glcr[p]	868	NA	NA	1.0257	0.8093	glcr	D-Glucarate	C00818
3hdecACP[c]	192	NA	NA	1.3649	0.8093	3hdecACP	(R)-3-Hydroxydecanoyl-[acyl-carrier protein]	C04619
5mta[c]	269	NA	NA	1.3221	0.8093	5mta	5-Methylthioadenosine	C00170
acgam1p[e]	313	NA	NA	1.3017	0.8093	acgam1p	N-Acetyl-D-glucosamine 1-phosphate	C04256
cpgn[e]	544	NA	NA	1.1872	0.8093	cpgn	coprogen	0
cpgn[p]	545	NA	NA	1.1862	0.8093	cpgn	coprogen	0
glcr[e]	867	NA	NA	1.0265	0.8093	glcr	D-Glucarate	C00818
asptrna[c]	457	NA	NA	1.2339	0.8093	asptrna	L-Aspartyl-tRNA(Asp)	C02984
but[p]	472	NA	NA	1.2227	0.8093	but	Butyrate (n-C4:0)	C00246
butso3[c]	473	NA	NA	1.2216	0.8093	butso3	butanesulfonate	0
galct-D[p]	820	NA	NA	1.0472	0.8093	galct-D	D-Galactarate	C00879
gal[e]	816	NA	NA	1.0505	0.8093	gal	D-Galactose	C00124
gbbtn[c]	841	NA	NA	1.0328	0.8093	gbbtn	gamma-butyrobetaine	0
gbbtn[e]	842	NA	NA	1.032	0.8093	gbbtn	gamma-butyrobetaine	0
gbbtn[p]	843	NA	NA	1.0312	0.8093	gbbtn	gamma-butyrobetaine	0
3hcinnm[p]	185	NA	NA	1.3718	0.8093	3hcinnm	3-hydroxycinnamic acid	0
3hcmrs7eACP[c]	186	NA	NA	1.3704	0.8093	3hcmrs7eACP	(R)-3-hydroxy-cis-myristol-7-eoyl-[acyl-carrier protein]	0
3hcpalm9eACP[c]	187	NA	NA	1.369	0.8093	3hcpalm9eACP	(R)-3-hydroxy-cis-palm-9-eoyl-[acyl-carrier protein]	0
ap5a[c]	415	NA	NA	1.2592	0.8093	ap5a	P1,P5-Bis(5'-adenosyl) pentaphosphate	C04058
g1p[e]	788	NA	NA	1.0646	0.8093	g1p	D-Glucose 1-phosphate	C00103
gal-bD[e]	813	NA	NA	1.0521	0.8093	gal-bD	beta D-Galactose	C01582
galct-D[c]	818	NA	NA	1.0488	0.8093	galct-D	D-Galactarate	C00879
galct-D[e]	819	NA	NA	1.048	0.8093	galct-D	D-Galactarate	C00879
h2[e]	940	NA	NA	1.0029	0.8093	h2	H2	C00282
cddec5eACP[c]	491	NA	NA	1.2074	0.8093	cddec5eACP	cis-dodec-5-enoyl-[acyl-carrier protein] (n-C12:1)	0
cdec3eACP[c]	492	NA	NA	1.2063	0.8093	cdec3eACP	cis-dec-3-enoyl-[acyl-carrier protein] (n-C10:1)	0
cystrna[c]	583	NA	NA	1.1547	0.8093	cystrna	L-Cysteinyl-tRNA(Cys)	C03125
gal1p[e]	811	NA	NA	1.0538	0.8093	gal1p	alpha-D-Galactose 1-phosphate	C00446
gal1p[p]	812	NA	NA	1.0529	0.8093	gal1p	alpha-D-Galactose 1-phosphate	C00446
3hpppn[c]	202	NA	NA	1.3567	0.8093	3hpppn	3-(3-hydroxy-phenyl)propionate	0
3hpppn[p]	204	NA	NA	1.3539	0.8093	3hpppn	3-(3-hydroxy-phenyl)propionate	0
dopa[p]	661	NA	NA	1.1221	0.8093	dopa	Dopamine	C03758
acac[c]	297	NA	NA	1.3106	0.8093	acac	Acetoacetate	C00164
acac[e]	298	NA	NA	1.3093	0.8093	acac	Acetoacetate	C00164
acac[p]	299	NA	NA	1.308	0.8093	acac	Acetoacetate	C00164
chol[e]	507	NA	NA	1.202	0.8093	chol	Choline	C00114
cit[p]	513	NA	NA	1.1978	0.8093	cit	Citrate	C00158
cu2[c]	564	NA	NA	1.1697	0.8093	cu2	Cu2+	0
cu2[e]	565	NA	NA	1.1687	0.8093	cu2	Cu2+	0
cu2[p]	566	NA	NA	1.1677	0.8093	cu2	Cu2+	0
fruur[e]	779	NA	NA	1.0688	0.8093	fruur	D-Fructuronate	C00905
3dhgulnp[c]	175	NA	NA	1.3816	0.8093	3dhgulnp	3-keto-L-gulonate-6-phosphate	0
butso3[e]	474	NA	NA	1.2205	0.8093	butso3	butanesulfonate	0
fmettrna[c]	762	NA	NA	1.0747	0.8093	fmettrna	N-Formylmethionyl-tRNA	C03294
acmana[c]	322	NA	NA	1.2955	0.8093	acmana	N-Acetyl-D-mannosamine	C00645
3hcinnm[e]	184	NA	NA	1.3732	0.8093	3hcinnm	3-hydroxycinnamic acid	0
acgal[e]	310	NA	NA	1.3042	0.8093	acgal	N-Acetyl-D-galactosamine	C01132
acmana[e]	323	NA	NA	1.2942	0.8093	acmana	N-Acetyl-D-mannosamine	C00645
acmana[p]	324	NA	NA	1.293	0.8093	acmana	N-Acetyl-D-mannosamine	C00645
adocbl[e]	352	NA	NA	1.2819	0.8093	adocbl	Adenosylcobalamin	C00194
adocbl[p]	353	NA	NA	1.2807	0.8093	adocbl	Adenosylcobalamin	C00194
all-D[e]	388	NA	NA	1.2687	0.8093	all-D	D-Allose	C01487
chol[p]	508	NA	NA	1.2009	0.8093	chol	Choline	C00114
cinnm[c]	510	NA	NA	1.1999	0.8093	cinnm	trans-Cinnamate	C00423
cit[e]	512	NA	NA	1.1988	0.8093	cit	Citrate	C00158
cl[c]	516	NA	NA	1.1967	0.8093	cl	Chloride	C00115
cl[e]	517	NA	NA	1.1956	0.8093	cl	Chloride	C00115
cl[p]	518	NA	NA	1.1946	0.8093	cl	Chloride	C00115
cpgn[c]	543	NA	NA	1.1883	0.8093	cpgn	coprogen	0
galur[e]	831	NA	NA	1.0384	0.8093	galur	D-Galacturonate	C00333
3haACP[c]	180	NA	NA	1.3774	0.8093	3haACP	(3R)-3-Hydroxyacyl-[acyl-carrier protein]	C01271
aso3[c]	449	NA	NA	1.2384	0.8093	aso3	arsenite	C06697
aso3[e]	450	NA	NA	1.2373	0.8093	aso3	arsenite	C06697
aso3[p]	451	NA	NA	1.2361	0.8093	aso3	arsenite	C06697
aso4[c]	452	NA	NA	1.235	0.8093	aso4	arsenate	C01478
cbi[p]	483	NA	NA	1.2128	0.8093	cbi	Cobinamide	C05774
dsbdox[c]	667	NA	NA	1.1174	0.8093	dsbdox	fused thiol:disulfide interchange protein (oxidized)	0
dsbdrd[c]	668	NA	NA	1.1165	0.8093	dsbdrd	fused thiol:disulfide interchange protein (reduced)	0
duri[e]	689	NA	NA	1.1092	0.8093	duri	Deoxyuridine	C00526
gam6p[p]	836	NA	NA	1.036	0.8093	gam6p	D-Glucosamine 6-phosphate	C00352
gdp[p]	847	NA	NA	1.0289	0.8093	gdp	GDP	C00035
gmp[e]	917	NA	NA	1.0119	0.8093	gmp	GMP	C00144
gmp[p]	918	NA	NA	1.0111	0.8093	gmp	GMP	C00144
gsn[e]	924	NA	NA	1.0081	0.8093	gsn	Guanosine	C00387
gsn[p]	925	NA	NA	1.0074	0.8093	gsn	Guanosine	C00387
34dhpac[e]	164	NA	NA	1.3916	0.8093	34dhpac	3,4-Dihydroxyphenylacetaldehyde	C04043
34dhpac[p]	165	NA	NA	1.3902	0.8093	34dhpac	3,4-Dihydroxyphenylacetaldehyde	C04043
3oddecACP[c]	215	NA	NA	1.3472	0.8093	3oddecACP	3-Oxododecanoyl-[acyl-carrier protein]	C05756
3omrsACP[c]	220	NA	NA	1.3432	0.8093	3omrsACP	3-Oxotetradecanoyl-[acyl-carrier protein]	C05759
3opalmACP[c]	225	NA	NA	1.3392	0.8093	3opalmACP	3-Oxohexadecanoyl-[acyl-carrier protein]	C05762
btn[c]	466	NA	NA	1.2294	0.8093	btn	Biotin	C00120
btnso[c]	467	NA	NA	1.2283	0.8093	btnso	d-biotin d-sulfoxide	0
cbl1[e]	485	NA	NA	1.2117	0.8093	cbl1	Cob(I)alamin	C00853
cenchddd[c]	502	NA	NA	1.2042	0.8093	cenchddd	cis-3-(3-carboxyethenyl)-3,5-cyclohexadiene-1,2-diol	0
cobalt2[p]	535	NA	NA	1.1893	0.8093	cobalt2	Co2+	C00175
crn[e]	554	NA	NA	1.1779	0.8093	crn	L-Carnitine	C00318
dad-2[p]	589	NA	NA	1.1527	0.8093	dad-2	Deoxyadenosine	C00559
damp[p]	594	NA	NA	1.1508	0.8093	damp	dAMP	C00360
feoxam-un[p]	758	NA	NA	1.0773	0.8093	feoxam-un	ferroxamine minus Fe(3)	0
fldox[c]	760	NA	NA	1.0764	0.8093	fldox	flavodoxin (oxidized)	C02869
frulys[c]	774	NA	NA	1.0722	0.8093	frulys	fructoselysine	0
frulys[p]	776	NA	NA	1.0705	0.8093	frulys	fructoselysine	0
galur[p]	832	NA	NA	1.0376	0.8093	galur	D-Galacturonate	C00333
glyb[e]	895	NA	NA	1.0157	0.8093	glyb	Glycine betaine	C00719
glyc2p[e]	897	NA	NA	1.0142	0.8093	glyc2p	Glycerol 2-phosphate	C02979
23camp[p]	59	NA	NA	1.4239	0.8093	23camp	2',3'-Cyclic AMP	C02353
3ohexACP[c]	219	NA	NA	1.3445	0.8093	3ohexACP	3-Oxohexanoyl-[acyl-carrier protein]	C05746
8aonn[c]	277	NA	NA	1.3182	0.8093	8aonn	8-Amino-7-oxononanoate	C01092
ag[e]	360	NA	NA	1.2783	0.8093	ag	silver	C06710
agdpcbi[c]	361	NA	NA	1.2771	0.8093	agdpcbi	Adenosine-GDP-cobinamide	C06510
butso3[p]	475	NA	NA	1.2194	0.8093	butso3	butanesulfonate	0
cu[e]	568	NA	NA	1.1657	0.8093	cu	Cu+	0
cys-D[p]	578	NA	NA	1.1557	0.8093	cys-D	D-Cysteine	C00793
damp[e]	593	NA	NA	1.1518	0.8093	damp	dAMP	C00360
dann[c]	595	NA	NA	1.1498	0.8093	dann	7,8-Diaminononanoate	C01037
dsbgox[p]	669	NA	NA	1.1156	0.8093	dsbgox	periplasmic disulfide isomerase/thiol-disulphide oxidase (oxidized)	0
dtmp[p]	682	NA	NA	1.1119	0.8093	dtmp	dTMP	C00364
galur[c]	830	NA	NA	1.0392	0.8093	galur	D-Galacturonate	C00333
glcur1p[e]	869	NA	NA	1.025	0.8093	glcur1p	D-Glucuronate 1-phosphate	C05385
glcur1p[p]	870	NA	NA	1.0242	0.8093	glcur1p	D-Glucuronate 1-phosphate	C05385
glcur[c]	871	NA	NA	1.0234	0.8093	glcur	D-Glucuronate	C00191
gthox[e]	927	NA	NA	1.0066	0.8093	gthox	Oxidized glutathione	C00127
h2[c]	939	NA	NA	1.0036	0.8093	h2	H2	C00282
cyan[c]	570	NA	NA	1.1637	0.8093	cyan	Hydrogen cyanide	C01326
cyan[e]	571	NA	NA	1.1627	0.8093	cyan	Hydrogen cyanide	C01326
cyan[p]	572	NA	NA	1.1617	0.8093	cyan	Hydrogen cyanide	C01326
3amp[p]	168	NA	NA	1.3873	0.8093	3amp	3'-AMP	C01367
3ocddec5eACP[c]	209	NA	NA	1.3526	0.8093	3ocddec5eACP	3-oxo-cis-dodec-5-enoyl-[acyl-carrier protein]	0
3ocmrs7eACP[c]	210	NA	NA	1.3512	0.8093	3ocmrs7eACP	3-oxo-cis-myristol-7-eoyl-[acyl-carrier protein]	0
3sala[c]	231	NA	NA	1.3378	0.8093	3sala	3-Sulfino-L-alanine	C00606
3ump[e]	232	NA	NA	1.3365	0.8093	3ump	3'-UMP	C01368
altrn[c]	396	NA	NA	1.2651	0.8093	altrn	D-Altronate	C00817
arab-L[e]	427	NA	NA	1.2557	0.8093	arab-L	L-Arabinose	C00259
betald[c]	462	NA	NA	1.2316	0.8093	betald	Betaine aldehyde	C00576
btal[c]	464	NA	NA	1.2305	0.8093	btal	Butanal	C01412
ca2[c]	476	NA	NA	1.2183	0.8093	ca2	Calcium	C00076
ca2[p]	478	NA	NA	1.2161	0.8093	ca2	Calcium	C00076
cbi[c]	481	NA	NA	1.215	0.8093	cbi	Cobinamide	C05774
ctbt[c]	560	NA	NA	1.1728	0.8093	ctbt	crotonobetaine	C04114
ctbtcoa[c]	562	NA	NA	1.1707	0.8093	ctbtcoa	crotonobetainyl-CoA	0
dcmp[p]	608	NA	NA	1.1449	0.8093	dcmp	dCMP	C00239
feoxam[p]	755	NA	NA	1.0799	0.8093	feoxam	ferroxamine	0
feoxam-un[c]	756	NA	NA	1.079	0.8093	feoxam-un	ferroxamine minus Fe(3)	0
feoxam-un[e]	757	NA	NA	1.0782	0.8093	feoxam-un	ferroxamine minus Fe(3)	0
fru[p]	773	NA	NA	1.073	0.8093	fru	D-Fructose	C00095
g3ps[p]	805	NA	NA	1.0562	0.8093	g3ps	Glycerophosphoserine	0
g6p[e]	807	NA	NA	1.0554	0.8093	g6p	D-Glucose 6-phosphate	C00092
gal-bD[p]	814	NA	NA	1.0513	0.8093	gal-bD	beta D-Galactose	C01582
gal[p]	817	NA	NA	1.0497	0.8093	gal	D-Galactose	C00124
glytrna[c]	912	NA	NA	1.0127	0.8093	glytrna	Glycyl-tRNA(Gly)	C02412
3hpalmACP[c]	201	NA	NA	1.358	0.8093	3hpalmACP	R-3-hydroxypalmitoyl-[acyl-carrier protein]	C04633
ACP[c]	278	NA	NA	1.3169	0.8093	ACP	acyl carrier protein	C00229
acgam1p[p]	314	NA	NA	1.3004	0.8093	acgam1p	N-Acetyl-D-glucosamine 1-phosphate	C04256
acmum[p]	328	NA	NA	1.2905	0.8093	acmum	N-Acetylmuramate	C02713
adocbi[c]	349	NA	NA	1.2844	0.8093	adocbi	Adenosyl cobinamide	C06508
adocbip[c]	350	NA	NA	1.2831	0.8093	adocbip	Adenosyl cobinamide phosphate	C06509
arab-L[p]	428	NA	NA	1.2545	0.8093	arab-L	L-Arabinose	C00259
aragund[c]	429	NA	NA	1.2534	0.8093	aragund	O-acetyl-rhamanosyl-N-acetylglucosamyl-undecaprenyl diphosphate	0
csn[p]	559	NA	NA	1.1738	0.8093	csn	Cytosine	C00380
dad-2[e]	588	NA	NA	1.1537	0.8093	dad-2	Deoxyadenosine	C00559
gtp[p]	934	NA	NA	1.0044	0.8093	gtp	GTP	C00044
dump[e]	686	NA	NA	1.111	0.8093	dump	dUMP	C00365
gdp[e]	846	NA	NA	1.0296	0.8093	gdp	GDP	C00035
glyb[c]	894	NA	NA	1.0165	0.8093	glyb	Glycine betaine	C00719
3gmp[p]	179	NA	NA	1.3788	0.8093	3gmp	3'-GMP	C06193
3ocpalm9eACP[c]	211	NA	NA	1.3499	0.8093	3ocpalm9eACP	3-oxo-cis-palm-9-eoyl-[acyl-carrier protein]	0
3ooctACP[c]	222	NA	NA	1.3418	0.8093	3ooctACP	3-Oxooctanoyl-[acyl-carrier protein]	C05750
4ahmmp[c]	240	NA	NA	1.3339	0.8093	4ahmmp	4-Amino-5-hydroxymethyl-2-methylpyrimidine	C01279
5prdmbz[c]	272	NA	NA	1.3195	0.8093	5prdmbz	N1-(5-Phospho-alpha-D-ribosyl)-5,6-dimethylbenzimidazole	C04778
acgal1p[p]	309	NA	NA	1.3055	0.8093	acgal1p	N-Acetyl-D-galactosamine 1-phosphate	0
ala-L[e]	379	NA	NA	1.2735	0.8093	ala-L	L-Alanine	C00041
alpp[p]	395	NA	NA	1.2663	0.8093	alpp	applipoprotein	C01834
asntrna[c]	448	NA	NA	1.2395	0.8093	asntrna	L-Asparaginyl-tRNA(Asn)	C03402
ca2[e]	477	NA	NA	1.2172	0.8093	ca2	Calcium	C00076
ethso3[c]	709	NA	NA	1.1064	0.8093	ethso3	ethanesulfonate	0
galt[e]	828	NA	NA	1.0408	0.8093	galt	Galactitol	C01697
dtmp[e]	681	NA	NA	1.1128	0.8093	dtmp	dTMP	C00364
23ccmp[e]	60	NA	NA	1.4224	0.8093	23ccmp	2',3'-Cyclic CMP	C02354
3hcddec5eACP[c]	182	NA	NA	1.376	0.8093	3hcddec5eACP	(R)-3-hydroxy-cis-dodec-5-enoyl-[acyl-carrier protein]	0
3hcinnm[c]	183	NA	NA	1.3746	0.8093	3hcinnm	3-hydroxycinnamic acid	0
4h2opntn[c]	243	NA	NA	1.3325	0.8093	4h2opntn	4-Hydroxy-2-oxopentanoate	C03589
arbtn-fe3[e]	434	NA	NA	1.2476	0.8093	arbtn-fe3	Aerobactin	C05554
arbtn-fe3[p]	435	NA	NA	1.2464	0.8093	arbtn-fe3	Aerobactin	C05554
ethso3[e]	710	NA	NA	1.1055	0.8093	ethso3	ethanesulfonate	0
fuc-L[c]	781	NA	NA	1.0671	0.8093	fuc-L	L-Fucose	C01019
fuc-L[e]	782	NA	NA	1.0662	0.8093	fuc-L	L-Fucose	C01019
fuc-L[p]	783	NA	NA	1.0654	0.8093	fuc-L	L-Fucose	C01019
2ddglcn[e]	121	NA	NA	1.4017	0.8093	2ddglcn	2-Dehydro-3-deoxy-D-gluconate	C00204
2dhguln[c]	126	NA	NA	1.3959	0.8093	2dhguln	2-Dehydro-L-gulonate	0
4mhetz[c]	249	NA	NA	1.3273	0.8093	4mhetz	4-Methyl-5-(2-hydroxyethyl)-thiazole	C04294
alatrna[c]	385	NA	NA	1.2711	0.8093	alatrna	L-Alanyl-tRNA(Ala)	C00886
all-D[c]	387	NA	NA	1.2699	0.8093	all-D	D-Allose	C01487
2ddglcn[p]	122	NA	NA	1.4003	0.8093	2ddglcn	2-Dehydro-3-deoxy-D-gluconate	C00204
2dh3dgal[c]	124	NA	NA	1.3988	0.8093	2dh3dgal	2-Dehydro-3-deoxy-D-galactonate	C01216
2dhglcn[c]	125	NA	NA	1.3974	0.8093	2dhglcn	2-Dehydro-D-gluconate	C00629
3dhguln[c]	174	NA	NA	1.3831	0.8093	3dhguln	3-Dehydro-L-gulonate	C00618
dimp[e]	643	NA	NA	1.1343	0.8093	dimp	dIMP	C06196
dimp[p]	644	NA	NA	1.1334	0.8093	dimp	dIMP	C06196
all-D[p]	389	NA	NA	1.2675	0.8093	all-D	D-Allose	C01487
3hddecACP[c]	191	NA	NA	1.3663	0.8093	3hddecACP	(R)-3-Hydroxydodecanoyl-[acyl-carrier protein]	C05757
3odecACP[c]	216	NA	NA	1.3458	0.8093	3odecACP	3-Oxodecanoyl-[acyl-carrier protein]	C05753
ap4a[c]	414	NA	NA	1.2604	0.8093	ap4a	P1,P4-Bis(5'-adenosyl) tetraphosphate	C01260
cmp[e]	527	NA	NA	1.1935	0.8093	cmp	CMP	C00055
cmp[p]	528	NA	NA	1.1925	0.8093	cmp	CMP	C00055
dump[p]	687	NA	NA	1.1101	0.8093	dump	dUMP	C00365
g6p[p]	808	NA	NA	1.0546	0.8093	g6p	D-Glucose 6-phosphate	C00092
ala-B[e]	373	NA	NA	1.2759	0.8093	ala-B	beta-Alanine	C00099
cpgn-un[p]	548	NA	NA	1.1831	0.8093	cpgn-un	coprogen unloaded (no Fe(III))	0
crnDcoa[c]	550	NA	NA	1.182	0.8093	crnDcoa	D-carnitinyl-CoA	0
ddca[e]	616	NA	NA	1.1411	0.8093	ddca	Dodecanoate (n-C12:0)	C02679
glcur[e]	872	NA	NA	1.0226	0.8093	glcur	D-Glucuronate	C00191
amp[p]	402	NA	NA	1.2616	0.8093	amp	AMP	C00020
ala-B[p]	374	NA	NA	1.2747	0.8093	ala-B	beta-Alanine	C00099
crn-D[c]	551	NA	NA	1.181	0.8093	crn-D	D-Carnitine	C00487
glcur[p]	873	NA	NA	1.0219	0.8093	glcur	D-Glucuronate	C00191
gln-L[e]	875	NA	NA	1.0211	0.8093	gln-L	L-Glutamine	C00064
3hcvac11eACP[c]	188	NA	NA	1.3676	0.8093	3hcvac11eACP	(R)-3-hydroxy-cis-vacc-11-enoyl-[acyl-carrier protein]	0
acACP[c]	293	NA	NA	1.3118	0.8093	acACP	Acetyl-ACP	0
acmum[e]	327	NA	NA	1.2917	0.8093	acmum	N-Acetylmuramate	C02713
cechddd[c]	501	NA	NA	1.2052	0.8093	cechddd	cis-3-(3-carboxyethyl)-3,5-cyclohexadiene-1,2-diol	0
galt[p]	829	NA	NA	1.04	0.8093	galt	Galactitol	C01697
dcaACP[c]	599	NA	NA	1.1488	0.8093	dcaACP	Decanoyl-ACP (n-C10:0ACP)	C05755
dgmp[e]	621	NA	NA	1.1401	0.8093	dgmp	dGMP	C00362
3amp[e]	167	NA	NA	1.3888	0.8093	3amp	3'-AMP	C01367
4hba[c]	244	NA	NA	1.3312	0.8093	4hba	4-Hydroxy-benzyl alcohol	0
arab-L[c]	426	NA	NA	1.2569	0.8093	arab-L	L-Arabinose	C00259
ascb-L[e]	443	NA	NA	1.2418	0.8093	ascb-L	L-Ascorbate	C00072
ascb-L[p]	444	NA	NA	1.2407	0.8093	ascb-L	L-Ascorbate	C00072
fruur[p]	780	NA	NA	1.0679	0.8093	fruur	D-Fructuronate	C00905
gly[e]	889	NA	NA	1.018	0.8093	gly	Glycine	C00037
glyb[p]	896	NA	NA	1.0149	0.8093	glyb	Glycine betaine	C00719
glyc2p[p]	898	NA	NA	1.0134	0.8093	glyc2p	Glycerol 2-phosphate	C02979
2kmb[c]	138	NA	NA	1.3945	0.8093	2kmb	2-keto-4-methylthiobutyrate	0
3cmp[p]	173	NA	NA	1.3845	0.8093	3cmp	3'-cmp	C05822
4hoxpacd[e]	246	NA	NA	1.3299	0.8093	4hoxpacd	4-Hydroxyphenylacetaldehyde	C03765
4hoxpacd[p]	247	NA	NA	1.3286	0.8093	4hoxpacd	4-Hydroxyphenylacetaldehyde	C03765
Sfglutth[c]	289	NA	NA	1.3144	0.8093	Sfglutth	S-Formylglutathione	C01031
aacald[c]	290	NA	NA	1.3131	0.8093	aacald	Aminoacetaldehyde	C06735
apoACP[c]	423	NA	NA	1.258	0.8093	apoACP	apoprotein [acyl carrier protein]	0
dxyl[c]	693	NA	NA	1.1074	0.8093	dxyl	1-deoxy-D-xylulose	C06257
grxox[c]	921	NA	NA	1.0096	0.8093	grxox	glutaredoxin (oxidized)	0
gthox[p]	928	NA	NA	1.0059	0.8093	gthox	Oxidized glutathione	C00127
12ppd-S[e]	20	NA	NA	1.433	0.8093	12ppd-S	(S)-Propane-1,2-diol	C02917
12ppd-S[p]	21	NA	NA	1.4315	0.8093	12ppd-S	(S)-Propane-1,2-diol	C02917
23ccmp[p]	61	NA	NA	1.4209	0.8093	23ccmp	2',3'-Cyclic CMP	C02354
23cgmp[e]	62	NA	NA	1.4194	0.8093	23cgmp	2',3'-Cyclic GMP	C06194
2ddglcn[c]	120	NA	NA	1.4032	0.8093	2ddglcn	2-Dehydro-3-deoxy-D-gluconate	C00204
Nmtrp[c]	288	NA	NA	1.3157	0.8093	Nmtrp	N-Methyltryptophan	C02983
acnam[e]	330	NA	NA	1.288	0.8093	acnam	N-Acetylneuraminate	C00270
acnam[p]	331	NA	NA	1.2868	0.8093	acnam	N-Acetylneuraminate	C00270
dcyt[p]	612	NA	NA	1.143	0.8093	dcyt	Deoxycytidine	C00881
ddcaACP[c]	614	NA	NA	1.142	0.8093	ddcaACP	Dodecanoyl-ACP (n-C12:0ACP)	C05223
dgsn[p]	625	NA	NA	1.1372	0.8093	dgsn	Deoxyguanosine	C00330
grxrd[c]	922	NA	NA	1.0089	0.8093	grxrd	glutaredoxin (reduced)	0
3hoctACP[c]	198	NA	NA	1.3608	0.8093	3hoctACP	(R)-3-Hydroxyoctanoyl-[acyl-carrier protein]	C04620
3hoctaACP[c]	199	NA	NA	1.3594	0.8093	3hoctaACP	(R)-3-Hydroxyoctadecanoyl-[acyl-carrier protein]	0
ctbt[p]	561	NA	NA	1.1718	0.8093	ctbt	crotonobetaine	C04114
dca[e]	601	NA	NA	1.1478	0.8093	dca	Decanoate (n-C10:0)	C01571
dca[p]	602	NA	NA	1.1469	0.8093	dca	Decanoate (n-C10:0)	C01571
fe3dcit[e]	733	NA	NA	1.0966	0.8093	fe3dcit	Fe(III)dicitrate	C06229
fe3dcit[p]	734	NA	NA	1.0957	0.8093	fe3dcit	Fe(III)dicitrate	C06229
fe3dhbzs[c]	735	NA	NA	1.0948	0.8093	fe3dhbzs	ferric 2,3-dihydroxybenzoylserine	0
fe3dhbzs[e]	736	NA	NA	1.0939	0.8093	fe3dhbzs	ferric 2,3-dihydroxybenzoylserine	0
fe3dhbzs[p]	737	NA	NA	1.093	0.8093	fe3dhbzs	ferric 2,3-dihydroxybenzoylserine	0
fe3hox[c]	738	NA	NA	1.0921	0.8093	fe3hox	Fe(III)hydroxamate	C06227
fe3hox[e]	739	NA	NA	1.0912	0.8093	fe3hox	Fe(III)hydroxamate	C06227
fe3hox[p]	740	NA	NA	1.0904	0.8093	fe3hox	Fe(III)hydroxamate	C06227
fe3hox-un[c]	741	NA	NA	1.0895	0.8093	fe3hox-un	Fe(III)hydoxamate, unloaded	0
fe3hox-un[e]	742	NA	NA	1.0886	0.8093	fe3hox-un	Fe(III)hydoxamate, unloaded	0
fe3hox-un[p]	743	NA	NA	1.0877	0.8093	fe3hox-un	Fe(III)hydoxamate, unloaded	0
fecrm[c]	744	NA	NA	1.0868	0.8093	fecrm	Ferrichrome	C06228
fecrm[e]	745	NA	NA	1.086	0.8093	fecrm	Ferrichrome	C06228
fecrm[p]	746	NA	NA	1.0851	0.8093	fecrm	Ferrichrome	C06228
fecrm-un[c]	747	NA	NA	1.0842	0.8093	fecrm-un	Ferrichrome minus Fe(III)	0
fecrm-un[e]	748	NA	NA	1.0834	0.8093	fecrm-un	Ferrichrome minus Fe(III)	0
fecrm-un[p]	749	NA	NA	1.0825	0.8093	fecrm-un	Ferrichrome minus Fe(III)	0
feoxam[c]	753	NA	NA	1.0816	0.8093	feoxam	ferroxamine	0
feoxam[e]	754	NA	NA	1.0808	0.8093	feoxam	ferroxamine	0
galctn-D[p]	823	NA	NA	1.0448	0.8093	galctn-D	D-Galactonate	C00880
gp4g[c]	919	NA	NA	1.0104	0.8093	gp4g	P1,P4-Bis(5'-guanosyl) tetraphosphate	C01261
23camp[e]	58	NA	NA	1.4254	0.8093	23camp	2',3'-Cyclic AMP	C02353
25dkglcn[c]	78	NA	NA	1.4076	0.8093	25dkglcn	2,5-diketo-D-gluconate	C02780
26dap-M[e]	82	NA	NA	1.4061	0.8093	26dap-M	meso-2,6-Diaminoheptanedioate	C00680
26dap-M[p]	83	NA	NA	1.4046	0.8093	26dap-M	meso-2,6-Diaminoheptanedioate	C00680
acnam[c]	329	NA	NA	1.2893	0.8093	acnam	N-Acetylneuraminate	C00270
cobalt2[c]	533	NA	NA	1.1914	0.8093	cobalt2	Co2+	C00175
din[e]	646	NA	NA	1.1324	0.8093	din	Deoxyinosine	C05512
din[p]	647	NA	NA	1.1315	0.8093	din	Deoxyinosine	C05512
g3pi[e]	801	NA	NA	1.0596	0.8093	g3pi	sn-Glycero-3-phospho-1-inositol	C01225
g3ps[c]	803	NA	NA	1.0579	0.8093	g3ps	Glycerophosphoserine	0
g3ps[e]	804	NA	NA	1.0571	0.8093	g3ps	Glycerophosphoserine	0
glutrna[c]	886	NA	NA	1.0188	0.8093	glutrna	L-Glutamyl-tRNA(Glu)	C02987
5mdru1p[c]	268	NA	NA	1.3234	0.8093	5mdru1p	5-Methylthio-5-deoxy-D-ribulose 1-phosphate	C04582
actACP[c]	341	NA	NA	1.2856	0.8093	actACP	Acetoacetyl-ACP	C05744
ag[c]	359	NA	NA	1.2795	0.8093	ag	silver	C06710
butACP[c]	469	NA	NA	1.226	0.8093	butACP	Butyryl-ACP (n-C4:0ACP)	C05745
cbi[e]	482	NA	NA	1.2139	0.8093	cbi	Cobinamide	C05774
crn[p]	555	NA	NA	1.1769	0.8093	crn	L-Carnitine	C00318
cu[c]	567	NA	NA	1.1667	0.8093	cu	Cu+	0
dcmp[e]	607	NA	NA	1.1459	0.8093	dcmp	dCMP	C00239
fldrd[c]	761	NA	NA	1.0756	0.8093	fldrd	flavodoxin (reduced)	C02745
galctn-L[e]	825	NA	NA	1.0432	0.8093	galctn-L	L-Galactonate	0
amp[e]	401	NA	NA	1.2627	0.8093	amp	AMP	C00020
chol[c]	506	NA	NA	1.2031	0.8093	chol	Choline	C00114
cobalt2[e]	534	NA	NA	1.1904	0.8093	cobalt2	Co2+	C00175
cpgn-un[e]	547	NA	NA	1.1841	0.8093	cpgn-un	coprogen unloaded (no Fe(III))	0
cynt[c]	573	NA	NA	1.1607	0.8093	cynt	Cyanate	C01417
cynt[e]	574	NA	NA	1.1597	0.8093	cynt	Cyanate	C01417
cynt[p]	575	NA	NA	1.1587	0.8093	cynt	Cyanate	C01417
dgmp[p]	622	NA	NA	1.1391	0.8093	dgmp	dGMP	C00362
dhpppn[c]	638	NA	NA	1.1353	0.8093	dhpppn	3-(2,3-Dihydroxyphenyl)propanoate	C04044
ethso3[p]	711	NA	NA	1.1046	0.8093	ethso3	ethanesulfonate	0
f1p[c]	715	NA	NA	1.1037	0.8093	f1p	D-Fructose 1-phosphate	C02976
f6p[e]	717	NA	NA	1.1028	0.8093	f6p	D-Fructose 6-phosphate	C00085
f6p[p]	718	NA	NA	1.1019	0.8093	f6p	D-Fructose 6-phosphate	C00085
fald[c]	721	NA	NA	1.101	0.8093	fald	Formaldehyde	C00067
fald[e]	722	NA	NA	1.1001	0.8093	fald	Formaldehyde	C00067
fald[p]	723	NA	NA	1.0992	0.8093	fald	Formaldehyde	C00067
fc1p[c]	724	NA	NA	1.0983	0.8093	fc1p	L-Fuculose 1-phosphate	C01099
fcl-L[c]	725	NA	NA	1.0975	0.8093	fcl-L	L-fuculose	C01721
g1p[p]	789	NA	NA	1.0637	0.8093	g1p	D-Glucose 1-phosphate	C00103
g3pc[c]	791	NA	NA	1.0629	0.8093	g3pc	sn-Glycero-3-phosphocholine	C00670
g3pc[e]	792	NA	NA	1.0621	0.8093	g3pc	sn-Glycero-3-phosphocholine	C00670
g3pc[p]	793	NA	NA	1.0612	0.8093	g3pc	sn-Glycero-3-phosphocholine	C00670
g3pi[c]	800	NA	NA	1.0604	0.8093	g3pi	sn-Glycero-3-phospho-1-inositol	C01225
g3pi[p]	802	NA	NA	1.0587	0.8093	g3pi	sn-Glycero-3-phospho-1-inositol	C01225
gtp[e]	933	NA	NA	1.0051	0.8093	gtp	GTP	C00044
14glucan[c]	23	NA	NA	1.4299	0.8093	14glucan	1,4-alpha-D-glucan	0
14glucan[e]	24	NA	NA	1.4284	0.8093	14glucan	1,4-alpha-D-glucan	0
14glucan[p]	25	NA	NA	1.4269	0.8093	14glucan	1,4-alpha-D-glucan	0
23cgmp[p]	63	NA	NA	1.4179	0.8093	23cgmp	2',3'-Cyclic GMP	C06194
23cump[e]	64	NA	NA	1.4164	0.8093	23cump	2',3'-Cyclic UMP	C02355
23cump[p]	65	NA	NA	1.415	0.8093	23cump	2',3'-Cyclic UMP	C02355
23dappa[c]	66	NA	NA	1.4135	0.8093	23dappa	2,3-diaminopropionate	C06393
23dappa[e]	67	NA	NA	1.412	0.8093	23dappa	2,3-diaminopropionate	C06393
23dappa[p]	68	NA	NA	1.4105	0.8093	23dappa	2,3-diaminopropionate	C06393
23doguln[c]	76	NA	NA	1.409	0.8093	23doguln	2,3-Dioxo-L-gulonate	C05409
3hhexACP[c]	195	NA	NA	1.3635	0.8093	3hhexACP	(R)-3-Hydroxyhexanoyl-[acyl-carrier protein]	C05747
3hmrsACP[c]	196	NA	NA	1.3621	0.8093	3hmrsACP	(R)-3-Hydroxytetradecanoyl-[acyl-carrier protein]	C04688
acgal1p[e]	308	NA	NA	1.3067	0.8093	acgal1p	N-Acetyl-D-galactosamine 1-phosphate	0
cu[p]	569	NA	NA	1.1647	0.8093	cu	Cu+	0
dms[e]	654	NA	NA	1.1277	0.8093	dms	Dimethyl sulfide	C00580
dmso[p]	658	NA	NA	1.124	0.8093	dmso	Dimethyl sulfoxide	C11143
dsbaox[p]	663	NA	NA	1.1212	0.8093	dsbaox	periplasmic protein disulfide isomerase I (oxidized)	0
dsbard[p]	664	NA	NA	1.1202	0.8093	dsbard	periplasmic protein disulfide isomerase I (reduced)	0
dsbcox[p]	665	NA	NA	1.1193	0.8093	dsbcox	protein disulfide isomerase II (oxidized)	0
dsbcrd[p]	666	NA	NA	1.1184	0.8093	dsbcrd	protein disulfide isomerase II (reduced)	0
gam[e]	837	NA	NA	1.0352	0.8093	gam	D-Glucosamine	C00329
gly[p]	890	NA	NA	1.0172	0.8093	gly	Glycine	C00037
3ump[p]	233	NA	NA	1.3352	0.8093	3ump	3'-UMP	C01368
5dh4dglc[c]	265	NA	NA	1.326	0.8093	5dh4dglc	5-Dehydro-4-deoxy-D-glucarate	C00679
5mdr1p[c]	267	NA	NA	1.3247	0.8093	5mdr1p	5-Methylthio-5-deoxy-D-ribose 1-phosphate	C04188
amob[c]	399	NA	NA	1.2639	0.8093	amob	S-Adenosyl-4-methylthio-2-oxobutanoate	C04425
dgsn[e]	624	NA	NA	1.1382	0.8093	dgsn	Deoxyguanosine	C00330
dkmpp[c]	649	NA	NA	1.1305	0.8093	dkmpp	2,3-diketo-5-methylthio-1-phosphopentane	0
dmbzid[c]	650	NA	NA	1.1296	0.8093	dmbzid	5,6-Dimethylbenzimidazole	C03114
dms[c]	653	NA	NA	1.1287	0.8093	dms	Dimethyl sulfide	C00580
dms[p]	655	NA	NA	1.1268	0.8093	dms	Dimethyl sulfide	C00580
dmso[c]	656	NA	NA	1.1258	0.8093	dmso	Dimethyl sulfoxide	C11143
dmso[e]	657	NA	NA	1.1249	0.8093	dmso	Dimethyl sulfoxide	C11143
dopa[e]	660	NA	NA	1.123	0.8093	dopa	Dopamine	C03758
galctn-L[c]	824	NA	NA	1.044	0.8093	galctn-L	L-Galactonate	0
galctn-L[p]	826	NA	NA	1.0424	0.8093	galctn-L	L-Galactonate	0
galt1p[c]	827	NA	NA	1.0416	0.8093	galt1p	Galactitol 1-phosphate	C06311
3gmp[e]	178	NA	NA	1.3802	0.8093	3gmp	3'-GMP	C06193
gcald[c]	844	NA	NA	1.0304	0.8093	gcald	Glycolaldehyde	C00266
fru[e]	772	NA	NA	1.0739	0.8093	fru	D-Fructose	C00095
5mtr[c]	271	NA	NA	1.3208	0.8093	5mtr	5-Methylthio-D-ribose	C03089
acgam[e]	317	NA	NA	1.2992	0.8093	acgam	N-Acetyl-D-glucosamine	C00140
acgam[p]	318	NA	NA	1.2979	0.8093	acgam	N-Acetyl-D-glucosamine	C00140
acmalt[c]	321	NA	NA	1.2967	0.8093	acmalt	Acetyl-maltose	C02130
glcr[c]	866	NA	NA	1.0273	0.8093	glcr	D-Glucarate	C00818
3ocvac11eACP[c]	212	NA	NA	1.3485	0.8093	3ocvac11eACP	3-oxo-cis-vacc-11-enoyl-[acyl-carrier protein]	0
cys-D[c]	576	NA	NA	1.1577	0.8093	cys-D	D-Cysteine	C00793
3cmp[e]	172	NA	NA	1.3859	0.8093	3cmp	3'-cmp	C05822
3ooctdACP[c]	223	NA	NA	1.3405	0.8093	3ooctdACP	3-Oxooctadecanoyl-[acyl-carrier protein]	0
cys-D[e]	577	NA	NA	1.1567	0.8093	cys-D	D-Cysteine	C00793
galctn-D[e]	822	NA	NA	1.0456	0.8093	galctn-D	D-Galactonate	C00880
duri[p]	690	NA	NA	1.1083	0.8093	duri	Deoxyuridine	C00526
3hpppn[e]	203	NA	NA	1.3553	0.8093	3hpppn	3-(3-hydroxy-phenyl)propionate	0
garagund[c]	840	NA	NA	1.0336	0.8093	garagund	glucosyl-O-acetyl-rhamanosyl-N-acetylglucosamyl-undecaprenyl diphosphate	0
crncoa[c]	556	NA	NA	1.1758	0.8093	crncoa	L-Carnitinyl-CoA	0
csn[e]	558	NA	NA	1.1748	0.8093	csn	Cytosine	C00380
2pglyc[c]	157	NA	NA	1.3931	0.8093	2pglyc	2-Phosphoglycolate	C00988
crn-D[p]	552	NA	NA	1.18	0.8093	crn-D	D-Carnitine	C00487
crn[c]	553	NA	NA	1.1789	0.8093	crn	L-Carnitine	C00318
gam[p]	838	NA	NA	1.0344	0.8093	gam	D-Glucosamine	C00329
gfgaragund[c]	853	NA	NA	1.0281	0.8093	gfgaragund	galactofuranosyl-glucosyl-O-acetyl-rhamanosyl-N-acetylglucosamyl-undecaprenyl diphosphate	0
glntrna[c]	877	NA	NA	1.0195	0.8093	glntrna	L-Glutaminyl-tRNA(Gln)	C02282
arbt6p[c]	430	NA	NA	1.2522	0.8093	arbt6p	Arbutin 6-phosphate	C06187
arbtn[c]	431	NA	NA	1.251	0.8093	arbtn	aerobactin minus Fe3	0
arbtn[e]	432	NA	NA	1.2499	0.8093	arbtn	aerobactin minus Fe3	0
argtrna[c]	441	NA	NA	1.2441	0.8093	argtrna	L-Arginyl-tRNA(Arg)	C02163
ascb6p[c]	442	NA	NA	1.243	0.8093	ascb6p	L-ascorbate-6-phosphate	0
dsbgrd[p]	670	NA	NA	1.1147	0.8093	dsbgrd	periplasmic disulfide isomerase/thiol-disulphide oxidase (reduced)	0
dtbt[c]	672	NA	NA	1.1138	0.8093	dtbt	Dethiobiotin	C01909
acgal[p]	311	NA	NA	1.303	0.8093	acgal	N-Acetyl-D-galactosamine	C01132
NA	NA	NA	NA	NA	NA	NA	#N/A	#N/A
NA	NA	NA	NA	NA	NA	NA	#N/A	#N/A
NA	NA	NA	NA	NA	NA	NA	#N/A	#N/A
NA	NA	NA	NA	NA	NA	NA	#N/A	#N/A
NA	NA	NA	NA	NA	NA	NA	#N/A	#N/A
NA	NA	NA	NA	NA	NA	NA	#N/A	#N/A
NA	NA	NA	NA	NA	NA	NA	#N/A	#N/A
NA	NA	NA	NA	NA	NA	NA	#N/A	#N/A
NA	NA	NA	NA	NA	NA	NA	#N/A	#N/A
NA	NA	NA	NA	NA	NA	NA	#N/A	#N/A
NA	NA	NA	NA	NA	NA	NA	#N/A	#N/A
NA	NA	NA	NA	NA	NA	NA	#N/A	#N/A
NA	NA	NA	NA	NA	NA	NA	#N/A	#N/A
NA	NA	NA	NA	NA	NA	NA	#N/A	#N/A
NA	NA	NA	NA	NA	NA	NA	#N/A	#N/A
NA	NA	NA	NA	NA	NA	NA	#N/A	#N/A
NA	NA	NA	NA	NA	NA	NA	#N/A	#N/A
NA	NA	NA	NA	NA	NA	NA	#N/A	#N/A
NA	NA	NA	NA	NA	NA	NA	#N/A	#N/A
NA	NA	NA	NA	NA	NA	NA	#N/A	#N/A
NA	NA	NA	NA	NA	NA	NA	#N/A	#N/A
NA	NA	NA	NA	NA	NA	NA	#N/A	#N/A
NA	NA	NA	NA	NA	NA	NA	#N/A	#N/A
NA	NA	NA	NA	NA	NA	NA	#N/A	#N/A
NA	NA	NA	NA	NA	NA	NA	#N/A	#N/A
NA	NA	NA	NA	NA	NA	NA	#N/A	#N/A
NA	NA	NA	NA	NA	NA	NA	#N/A	#N/A
NA	NA	NA	NA	NA	NA	NA	#N/A	#N/A
NA	NA	NA	NA	NA	NA	NA	#N/A	#N/A
NA	NA	NA	NA	NA	NA	NA	#N/A	#N/A
NA	NA	NA	NA	NA	NA	NA	#N/A	#N/A
NA	NA	NA	NA	NA	NA	NA	#N/A	#N/A
NA	NA	NA	NA	NA	NA	NA	#N/A	#N/A
NA	NA	NA	NA	NA	NA	NA	#N/A	#N/A
NA	NA	NA	NA	NA	NA	NA	#N/A	#N/A
NA	NA	NA	NA	NA	NA	NA	#N/A	#N/A
NA	NA	NA	NA	NA	NA	NA	#N/A	#N/A
NA	NA	NA	NA	NA	NA	NA	#N/A	#N/A
NA	NA	NA	NA	NA	NA	NA	#N/A	#N/A
NA	NA	NA	NA	NA	NA	NA	#N/A	#N/A
NA	NA	NA	NA	NA	NA	NA	#N/A	#N/A
NA	NA	NA	NA	NA	NA	NA	#N/A	#N/A
NA	NA	NA	NA	NA	NA	NA	#N/A	#N/A
NA	NA	NA	NA	NA	NA	NA	#N/A	#N/A
NA	NA	NA	NA	NA	NA	NA	#N/A	#N/A
NA	NA	NA	NA	NA	NA	NA	#N/A	#N/A
NA	NA	NA	NA	NA	NA	NA	#N/A	#N/A
NA	NA	NA	NA	NA	NA	NA	#N/A	#N/A
NA	NA	NA	NA	NA	NA	NA	#N/A	#N/A
NA	NA	NA	NA	NA	NA	NA	#N/A	#N/A
NA	NA	NA	NA	NA	NA	NA	#N/A	#N/A
NA	NA	NA	NA	NA	NA	NA	#N/A	#N/A
NA	NA	NA	NA	NA	NA	NA	#N/A	#N/A
NA	NA	NA	NA	NA	NA	NA	#N/A	#N/A
NA	NA	NA	NA	NA	NA	NA	#N/A	#N/A
NA	NA	NA	NA	NA	NA	NA	#N/A	#N/A
NA	NA	NA	NA	NA	NA	NA	#N/A	#N/A
NA	NA	NA	NA	NA	NA	NA	#N/A	#N/A
NA	NA	NA	NA	NA	NA	NA	#N/A	#N/A
NA	NA	NA	NA	NA	NA	NA	#N/A	#N/A
NA	NA	NA	NA	NA	NA	NA	#N/A	#N/A
NA	NA	NA	NA	NA	NA	NA	#N/A	#N/A
NA	NA	NA	NA	NA	NA	NA	#N/A	#N/A
NA	NA	NA	NA	NA	NA	NA	#N/A	#N/A
NA	NA	NA	NA	NA	NA	NA	#N/A	#N/A
NA	NA	NA	NA	NA	NA	NA	#N/A	#N/A
NA	NA	NA	NA	NA	NA	NA	#N/A	#N/A
NA	NA	NA	NA	NA	NA	NA	#N/A	#N/A
NA	NA	NA	NA	NA	NA	NA	#N/A	#N/A
NA	NA	NA	NA	NA	NA	NA	#N/A	#N/A
NA	NA	NA	NA	NA	NA	NA	#N/A	#N/A
NA	NA	NA	NA	NA	NA	NA	#N/A	#N/A
NA	NA	NA	NA	NA	NA	NA	#N/A	#N/A
NA	NA	NA	NA	NA	NA	NA	#N/A	#N/A
NA	NA	NA	NA	NA	NA	NA	#N/A	#N/A
NA	NA	NA	NA	NA	NA	NA	#N/A	#N/A
NA	NA	NA	NA	NA	NA	NA	#N/A	#N/A
NA	NA	NA	NA	NA	NA	NA	#N/A	#N/A
NA	NA	NA	NA	NA	NA	NA	#N/A	#N/A
NA	NA	NA	NA	NA	NA	NA	#N/A	#N/A
NA	NA	NA	NA	NA	NA	NA	#N/A	#N/A
NA	NA	NA	NA	NA	NA	NA	#N/A	#N/A
NA	NA	NA	NA	NA	NA	NA	#N/A	#N/A
NA	NA	NA	NA	NA	NA	NA	#N/A	#N/A
NA	NA	NA	NA	NA	NA	NA	#N/A	#N/A
NA	NA	NA	NA	NA	NA	NA	#N/A	#N/A
NA	NA	NA	NA	NA	NA	NA	#N/A	#N/A
NA	NA	NA	NA	NA	NA	NA	#N/A	#N/A
NA	NA	NA	NA	NA	NA	NA	#N/A	#N/A
NA	NA	NA	NA	NA	NA	NA	#N/A	#N/A
NA	NA	NA	NA	NA	NA	NA	#N/A	#N/A
NA	NA	NA	NA	NA	NA	NA	#N/A	#N/A
NA	NA	NA	NA	NA	NA	NA	#N/A	#N/A
NA	NA	NA	NA	NA	NA	NA	#N/A	#N/A
NA	NA	NA	NA	NA	NA	NA	#N/A	#N/A
NA	NA	NA	NA	NA	NA	NA	#N/A	#N/A
NA	NA	NA	NA	NA	NA	NA	#N/A	#N/A
NA	NA	NA	NA	NA	NA	NA	#N/A	#N/A
NA	NA	NA	NA	NA	NA	NA	#N/A	#N/A
NA	NA	NA	NA	NA	NA	NA	#N/A	#N/A
NA	NA	NA	NA	NA	NA	NA	#N/A	#N/A
NA	NA	NA	NA	NA	NA	NA	#N/A	#N/A
NA	NA	NA	NA	NA	NA	NA	#N/A	#N/A
NA	NA	NA	NA	NA	NA	NA	#N/A	#N/A
NA	NA	NA	NA	NA	NA	NA	#N/A	#N/A
NA	NA	NA	NA	NA	NA	NA	#N/A	#N/A
NA	NA	NA	NA	NA	NA	NA	#N/A	#N/A
NA	NA	NA	NA	NA	NA	NA	#N/A	#N/A
NA	NA	NA	NA	NA	NA	NA	#N/A	#N/A
NA	NA	NA	NA	NA	NA	NA	#N/A	#N/A
NA	NA	NA	NA	NA	NA	NA	#N/A	#N/A
NA	NA	NA	NA	NA	NA	NA	#N/A	#N/A
NA	NA	NA	NA	NA	NA	NA	#N/A	#N/A
NA	NA	NA	NA	NA	NA	NA	#N/A	#N/A
NA	NA	NA	NA	NA	NA	NA	#N/A	#N/A
NA	NA	NA	NA	NA	NA	NA	#N/A	#N/A
NA	NA	NA	NA	NA	NA	NA	#N/A	#N/A
NA	NA	NA	NA	NA	NA	NA	#N/A	#N/A
NA	NA	NA	NA	NA	NA	NA	#N/A	#N/A
NA	NA	NA	NA	NA	NA	NA	#N/A	#N/A
NA	NA	NA	NA	NA	NA	NA	#N/A	#N/A
NA	NA	NA	NA	NA	NA	NA	#N/A	#N/A
NA	NA	NA	NA	NA	NA	NA	#N/A	#N/A
NA	NA	NA	NA	NA	NA	NA	#N/A	#N/A
NA	NA	NA	NA	NA	NA	NA	#N/A	#N/A
NA	NA	NA	NA	NA	NA	NA	#N/A	#N/A
NA	NA	NA	NA	NA	NA	NA	#N/A	#N/A
NA	NA	NA	NA	NA	NA	NA	#N/A	#N/A
NA	NA	NA	NA	NA	NA	NA	#N/A	#N/A
NA	NA	NA	NA	NA	NA	NA	#N/A	#N/A
NA	NA	NA	NA	NA	NA	NA	#N/A	#N/A
NA	NA	NA	NA	NA	NA	NA	#N/A	#N/A
NA	NA	NA	NA	NA	NA	NA	#N/A	#N/A
NA	NA	NA	NA	NA	NA	NA	#N/A	#N/A
NA	NA	NA	NA	NA	NA	NA	#N/A	#N/A
NA	NA	NA	NA	NA	NA	NA	#N/A	#N/A
NA	NA	NA	NA	NA	NA	NA	#N/A	#N/A
NA	NA	NA	NA	NA	NA	NA	#N/A	#N/A
NA	NA	NA	NA	NA	NA	NA	#N/A	#N/A
NA	NA	NA	NA	NA	NA	NA	#N/A	#N/A
NA	NA	NA	NA	NA	NA	NA	#N/A	#N/A
NA	NA	NA	NA	NA	NA	NA	#N/A	#N/A
NA	NA	NA	NA	NA	NA	NA	#N/A	#N/A
NA	NA	NA	NA	NA	NA	NA	#N/A	#N/A
NA	NA	NA	NA	NA	NA	NA	#N/A	#N/A
NA	NA	NA	NA	NA	NA	NA	#N/A	#N/A
NA	NA	NA	NA	NA	NA	NA	#N/A	#N/A
NA	NA	NA	NA	NA	NA	NA	#N/A	#N/A
NA	NA	NA	NA	NA	NA	NA	#N/A	#N/A
NA	NA	NA	NA	NA	NA	NA	#N/A	#N/A
NA	NA	NA	NA	NA	NA	NA	#N/A	#N/A
NA	NA	NA	NA	NA	NA	NA	#N/A	#N/A
NA	NA	NA	NA	NA	NA	NA	#N/A	#N/A
NA	NA	NA	NA	NA	NA	NA	#N/A	#N/A
NA	NA	NA	NA	NA	NA	NA	#N/A	#N/A
NA	NA	NA	NA	NA	NA	NA	#N/A	#N/A
NA	NA	NA	NA	NA	NA	NA	#N/A	#N/A
NA	NA	NA	NA	NA	NA	NA	#N/A	#N/A
NA	NA	NA	NA	NA	NA	NA	#N/A	#N/A
NA	NA	NA	NA	NA	NA	NA	#N/A	#N/A
NA	NA	NA	NA	NA	NA	NA	#N/A	#N/A
NA	NA	NA	NA	NA	NA	NA	#N/A	#N/A
NA	NA	NA	NA	NA	NA	NA	#N/A	#N/A
NA	NA	NA	NA	NA	NA	NA	#N/A	#N/A
NA	NA	NA	NA	NA	NA	NA	#N/A	#N/A
NA	NA	NA	NA	NA	NA	NA	#N/A	#N/A
NA	NA	NA	NA	NA	NA	NA	#N/A	#N/A
NA	NA	NA	NA	NA	NA	NA	#N/A	#N/A
NA	NA	NA	NA	NA	NA	NA	#N/A	#N/A
NA	NA	NA	NA	NA	NA	NA	#N/A	#N/A
NA	NA	NA	NA	NA	NA	NA	#N/A	#N/A
NA	NA	NA	NA	NA	NA	NA	#N/A	#N/A
NA	NA	NA	NA	NA	NA	NA	#N/A	#N/A
NA	NA	NA	NA	NA	NA	NA	#N/A	#N/A
NA	NA	NA	NA	NA	NA	NA	#N/A	#N/A
NA	NA	NA	NA	NA	NA	NA	#N/A	#N/A
NA	NA	NA	NA	NA	NA	NA	#N/A	#N/A
NA	NA	NA	NA	NA	NA	NA	#N/A	#N/A
NA	NA	NA	NA	NA	NA	NA	#N/A	#N/A
NA	NA	NA	NA	NA	NA	NA	#N/A	#N/A
NA	NA	NA	NA	NA	NA	NA	#N/A	#N/A
NA	NA	NA	NA	NA	NA	NA	#N/A	#N/A
NA	NA	NA	NA	NA	NA	NA	#N/A	#N/A
NA	NA	NA	NA	NA	NA	NA	#N/A	#N/A
NA	NA	NA	NA	NA	NA	NA	#N/A	#N/A
NA	NA	NA	NA	NA	NA	NA	#N/A	#N/A
NA	NA	NA	NA	NA	NA	NA	#N/A	#N/A
NA	NA	NA	NA	NA	NA	NA	#N/A	#N/A
NA	NA	NA	NA	NA	NA	NA	#N/A	#N/A
NA	NA	NA	NA	NA	NA	NA	#N/A	#N/A
NA	NA	NA	NA	NA	NA	NA	#N/A	#N/A
NA	NA	NA	NA	NA	NA	NA	#N/A	#N/A
NA	NA	NA	NA	NA	NA	NA	#N/A	#N/A
NA	NA	NA	NA	NA	NA	NA	#N/A	#N/A
NA	NA	NA	NA	NA	NA	NA	#N/A	#N/A
NA	NA	NA	NA	NA	NA	NA	#N/A	#N/A
NA	NA	NA	NA	NA	NA	NA	#N/A	#N/A
NA	NA	NA	NA	NA	NA	NA	#N/A	#N/A
NA	NA	NA	NA	NA	NA	NA	#N/A	#N/A
NA	NA	NA	NA	NA	NA	NA	#N/A	#N/A
NA	NA	NA	NA	NA	NA	NA	#N/A	#N/A
NA	NA	NA	NA	NA	NA	NA	#N/A	#N/A
NA	NA	NA	NA	NA	NA	NA	#N/A	#N/A
NA	NA	NA	NA	NA	NA	NA	#N/A	#N/A
NA	NA	NA	NA	NA	NA	NA	#N/A	#N/A
NA	NA	NA	NA	NA	NA	NA	#N/A	#N/A
NA	NA	NA	NA	NA	NA	NA	#N/A	#N/A
NA	NA	NA	NA	NA	NA	NA	#N/A	#N/A
NA	NA	NA	NA	NA	NA	NA	#N/A	#N/A
NA	NA	NA	NA	NA	NA	NA	#N/A	#N/A
NA	NA	NA	NA	NA	NA	NA	#N/A	#N/A
NA	NA	NA	NA	NA	NA	NA	#N/A	#N/A
NA	NA	NA	NA	NA	NA	NA	#N/A	#N/A
NA	NA	NA	NA	NA	NA	NA	#N/A	#N/A
NA	NA	NA	NA	NA	NA	NA	#N/A	#N/A
NA	NA	NA	NA	NA	NA	NA	#N/A	#N/A
NA	NA	NA	NA	NA	NA	NA	#N/A	#N/A
NA	NA	NA	NA	NA	NA	NA	#N/A	#N/A
NA	NA	NA	NA	NA	NA	NA	#N/A	#N/A
NA	NA	NA	NA	NA	NA	NA	#N/A	#N/A
NA	NA	NA	NA	NA	NA	NA	#N/A	#N/A
NA	NA	NA	NA	NA	NA	NA	#N/A	#N/A
NA	NA	NA	NA	NA	NA	NA	#N/A	#N/A
NA	NA	NA	NA	NA	NA	NA	#N/A	#N/A
NA	NA	NA	NA	NA	NA	NA	#N/A	#N/A
NA	NA	NA	NA	NA	NA	NA	#N/A	#N/A
NA	NA	NA	NA	NA	NA	NA	#N/A	#N/A
NA	NA	NA	NA	NA	NA	NA	#N/A	#N/A
NA	NA	NA	NA	NA	NA	NA	#N/A	#N/A
NA	NA	NA	NA	NA	NA	NA	#N/A	#N/A
NA	NA	NA	NA	NA	NA	NA	#N/A	#N/A
NA	NA	NA	NA	NA	NA	NA	#N/A	#N/A
NA	NA	NA	NA	NA	NA	NA	#N/A	#N/A
NA	NA	NA	NA	NA	NA	NA	#N/A	#N/A
NA	NA	NA	NA	NA	NA	NA	#N/A	#N/A
NA	NA	NA	NA	NA	NA	NA	#N/A	#N/A
NA	NA	NA	NA	NA	NA	NA	#N/A	#N/A
NA	NA	NA	NA	NA	NA	NA	#N/A	#N/A
NA	NA	NA	NA	NA	NA	NA	#N/A	#N/A
NA	NA	NA	NA	NA	NA	NA	#N/A	#N/A
NA	NA	NA	NA	NA	NA	NA	#N/A	#N/A
NA	NA	NA	NA	NA	NA	NA	#N/A	#N/A
NA	NA	NA	NA	NA	NA	NA	#N/A	#N/A
NA	NA	NA	NA	NA	NA	NA	#N/A	#N/A
NA	NA	NA	NA	NA	NA	NA	#N/A	#N/A
NA	NA	NA	NA	NA	NA	NA	#N/A	#N/A
NA	NA	NA	NA	NA	NA	NA	#N/A	#N/A
NA	NA	NA	NA	NA	NA	NA	#N/A	#N/A
NA	NA	NA	NA	NA	NA	NA	#N/A	#N/A
NA	NA	NA	NA	NA	NA	NA	#N/A	#N/A
NA	NA	NA	NA	NA	NA	NA	#N/A	#N/A
NA	NA	NA	NA	NA	NA	NA	#N/A	#N/A
NA	NA	NA	NA	NA	NA	NA	#N/A	#N/A
NA	NA	NA	NA	NA	NA	NA	#N/A	#N/A
NA	NA	NA	NA	NA	NA	NA	#N/A	#N/A
NA	NA	NA	NA	NA	NA	NA	#N/A	#N/A
NA	NA	NA	NA	NA	NA	NA	#N/A	#N/A
NA	NA	NA	NA	NA	NA	NA	#N/A	#N/A
NA	NA	NA	NA	NA	NA	NA	#N/A	#N/A
NA	NA	NA	NA	NA	NA	NA	#N/A	#N/A
NA	NA	NA	NA	NA	NA	NA	#N/A	#N/A
NA	NA	NA	NA	NA	NA	NA	#N/A	#N/A
NA	NA	NA	NA	NA	NA	NA	#N/A	#N/A
NA	NA	NA	NA	NA	NA	NA	#N/A	#N/A
NA	NA	NA	NA	NA	NA	NA	#N/A	#N/A
NA	NA	NA	NA	NA	NA	NA	#N/A	#N/A
NA	NA	NA	NA	NA	NA	NA	#N/A	#N/A
NA	NA	NA	NA	NA	NA	NA	#N/A	#N/A
NA	NA	NA	NA	NA	NA	NA	#N/A	#N/A
NA	NA	NA	NA	NA	NA	NA	#N/A	#N/A
NA	NA	NA	NA	NA	NA	NA	#N/A	#N/A
NA	NA	NA	NA	NA	NA	NA	#N/A	#N/A
NA	NA	NA	NA	NA	NA	NA	#N/A	#N/A
NA	NA	NA	NA	NA	NA	NA	#N/A	#N/A
NA	NA	NA	NA	NA	NA	NA	#N/A	#N/A
NA	NA	NA	NA	NA	NA	NA	#N/A	#N/A
NA	NA	NA	NA	NA	NA	NA	#N/A	#N/A
NA	NA	NA	NA	NA	NA	NA	#N/A	#N/A
NA	NA	NA	NA	NA	NA	NA	#N/A	#N/A
NA	NA	NA	NA	NA	NA	NA	#N/A	#N/A
NA	NA	NA	NA	NA	NA	NA	#N/A	#N/A
NA	NA	NA	NA	NA	NA	NA	#N/A	#N/A
NA	NA	NA	NA	NA	NA	NA	#N/A	#N/A
NA	NA	NA	NA	NA	NA	NA	#N/A	#N/A
NA	NA	NA	NA	NA	NA	NA	#N/A	#N/A
NA	NA	NA	NA	NA	NA	NA	#N/A	#N/A
NA	NA	NA	NA	NA	NA	NA	#N/A	#N/A
NA	NA	NA	NA	NA	NA	NA	#N/A	#N/A
NA	NA	NA	NA	NA	NA	NA	#N/A	#N/A
NA	NA	NA	NA	NA	NA	NA	#N/A	#N/A
NA	NA	NA	NA	NA	NA	NA	#N/A	#N/A
NA	NA	NA	NA	NA	NA	NA	#N/A	#N/A
NA	NA	NA	NA	NA	NA	NA	#N/A	#N/A
NA	NA	NA	NA	NA	NA	NA	#N/A	#N/A
NA	NA	NA	NA	NA	NA	NA	#N/A	#N/A
NA	NA	NA	NA	NA	NA	NA	#N/A	#N/A
NA	NA	NA	NA	NA	NA	NA	#N/A	#N/A
NA	NA	NA	NA	NA	NA	NA	#N/A	#N/A
NA	NA	NA	NA	NA	NA	NA	#N/A	#N/A
NA	NA	NA	NA	NA	NA	NA	#N/A	#N/A
NA	NA	NA	NA	NA	NA	NA	#N/A	#N/A
NA	NA	NA	NA	NA	NA	NA	#N/A	#N/A
NA	NA	NA	NA	NA	NA	NA	#N/A	#N/A
NA	NA	NA	NA	NA	NA	NA	#N/A	#N/A
NA	NA	NA	NA	NA	NA	NA	#N/A	#N/A
NA	NA	NA	NA	NA	NA	NA	#N/A	#N/A
NA	NA	NA	NA	NA	NA	NA	#N/A	#N/A
NA	NA	NA	NA	NA	NA	NA	#N/A	#N/A
NA	NA	NA	NA	NA	NA	NA	#N/A	#N/A
NA	NA	NA	NA	NA	NA	NA	#N/A	#N/A
NA	NA	NA	NA	NA	NA	NA	#N/A	#N/A
NA	NA	NA	NA	NA	NA	NA	#N/A	#N/A
NA	NA	NA	NA	NA	NA	NA	#N/A	#N/A
NA	NA	NA	NA	NA	NA	NA	#N/A	#N/A
NA	NA	NA	NA	NA	NA	NA	#N/A	#N/A
NA	NA	NA	NA	NA	NA	NA	#N/A	#N/A
NA	NA	NA	NA	NA	NA	NA	#N/A	#N/A
NA	NA	NA	NA	NA	NA	NA	#N/A	#N/A
NA	NA	NA	NA	NA	NA	NA	#N/A	#N/A
NA	NA	NA	NA	NA	NA	NA	#N/A	#N/A
NA	NA	NA	NA	NA	NA	NA	#N/A	#N/A
NA	NA	NA	NA	NA	NA	NA	#N/A	#N/A
NA	NA	NA	NA	NA	NA	NA	#N/A	#N/A
NA	NA	NA	NA	NA	NA	NA	#N/A	#N/A
NA	NA	NA	NA	NA	NA	NA	#N/A	#N/A
NA	NA	NA	NA	NA	NA	NA	#N/A	#N/A
NA	NA	NA	NA	NA	NA	NA	#N/A	#N/A
NA	NA	NA	NA	NA	NA	NA	#N/A	#N/A
NA	NA	NA	NA	NA	NA	NA	#N/A	#N/A
NA	NA	NA	NA	NA	NA	NA	#N/A	#N/A
NA	NA	NA	NA	NA	NA	NA	#N/A	#N/A
NA	NA	NA	NA	NA	NA	NA	#N/A	#N/A
NA	NA	NA	NA	NA	NA	NA	#N/A	#N/A
NA	NA	NA	NA	NA	NA	NA	#N/A	#N/A
NA	NA	NA	NA	NA	NA	NA	#N/A	#N/A
NA	NA	NA	NA	NA	NA	NA	#N/A	#N/A
NA	NA	NA	NA	NA	NA	NA	#N/A	#N/A
NA	NA	NA	NA	NA	NA	NA	#N/A	#N/A
NA	NA	NA	NA	NA	NA	NA	#N/A	#N/A
NA	NA	NA	NA	NA	NA	NA	#N/A	#N/A
NA	NA	NA	NA	NA	NA	NA	#N/A	#N/A
NA	NA	NA	NA	NA	NA	NA	#N/A	#N/A
NA	NA	NA	NA	NA	NA	NA	#N/A	#N/A
NA	NA	NA	NA	NA	NA	NA	#N/A	#N/A
NA	NA	NA	NA	NA	NA	NA	#N/A	#N/A
NA	NA	NA	NA	NA	NA	NA	#N/A	#N/A
NA	NA	NA	NA	NA	NA	NA	#N/A	#N/A
NA	NA	NA	NA	NA	NA	NA	#N/A	#N/A
NA	NA	NA	NA	NA	NA	NA	#N/A	#N/A
NA	NA	NA	NA	NA	NA	NA	#N/A	#N/A
NA	NA	NA	NA	NA	NA	NA	#N/A	#N/A
NA	NA	NA	NA	NA	NA	NA	#N/A	#N/A
NA	NA	NA	NA	NA	NA	NA	#N/A	#N/A
NA	NA	NA	NA	NA	NA	NA	#N/A	#N/A
NA	NA	NA	NA	NA	NA	NA	#N/A	#N/A
NA	NA	NA	NA	NA	NA	NA	#N/A	#N/A
NA	NA	NA	NA	NA	NA	NA	#N/A	#N/A
NA	NA	NA	NA	NA	NA	NA	#N/A	#N/A
NA	NA	NA	NA	NA	NA	NA	#N/A	#N/A
NA	NA	NA	NA	NA	NA	NA	#N/A	#N/A
NA	NA	NA	NA	NA	NA	NA	#N/A	#N/A
NA	NA	NA	NA	NA	NA	NA	#N/A	#N/A
NA	NA	NA	NA	NA	NA	NA	#N/A	#N/A
NA	NA	NA	NA	NA	NA	NA	#N/A	#N/A
NA	NA	NA	NA	NA	NA	NA	#N/A	#N/A
NA	NA	NA	NA	NA	NA	NA	#N/A	#N/A
NA	NA	NA	NA	NA	NA	NA	#N/A	#N/A
NA	NA	NA	NA	NA	NA	NA	#N/A	#N/A
NA	NA	NA	NA	NA	NA	NA	#N/A	#N/A
NA	NA	NA	NA	NA	NA	NA	#N/A	#N/A
NA	NA	NA	NA	NA	NA	NA	#N/A	#N/A
NA	NA	NA	NA	NA	NA	NA	#N/A	#N/A
NA	NA	NA	NA	NA	NA	NA	#N/A	#N/A
NA	NA	NA	NA	NA	NA	NA	#N/A	#N/A
NA	NA	NA	NA	NA	NA	NA	#N/A	#N/A
NA	NA	NA	NA	NA	NA	NA	#N/A	#N/A
NA	NA	NA	NA	NA	NA	NA	#N/A	#N/A
NA	NA	NA	NA	NA	NA	NA	#N/A	#N/A
NA	NA	NA	NA	NA	NA	NA	#N/A	#N/A
NA	NA	NA	NA	NA	NA	NA	#N/A	#N/A
NA	NA	NA	NA	NA	NA	NA	#N/A	#N/A
NA	NA	NA	NA	NA	NA	NA	#N/A	#N/A
NA	NA	NA	NA	NA	NA	NA	#N/A	#N/A
NA	NA	NA	NA	NA	NA	NA	#N/A	#N/A
NA	NA	NA	NA	NA	NA	NA	#N/A	#N/A
NA	NA	NA	NA	NA	NA	NA	#N/A	#N/A
NA	NA	NA	NA	NA	NA	NA	#N/A	#N/A
NA	NA	NA	NA	NA	NA	NA	#N/A	#N/A
NA	NA	NA	NA	NA	NA	NA	#N/A	#N/A
NA	NA	NA	NA	NA	NA	NA	#N/A	#N/A
NA	NA	NA	NA	NA	NA	NA	#N/A	#N/A
NA	NA	NA	NA	NA	NA	NA	#N/A	#N/A
NA	NA	NA	NA	NA	NA	NA	#N/A	#N/A
NA	NA	NA	NA	NA	NA	NA	#N/A	#N/A
NA	NA	NA	NA	NA	NA	NA	#N/A	#N/A
NA	NA	NA	NA	NA	NA	NA	#N/A	#N/A
NA	NA	NA	NA	NA	NA	NA	#N/A	#N/A
NA	NA	NA	NA	NA	NA	NA	#N/A	#N/A
NA	NA	NA	NA	NA	NA	NA	#N/A	#N/A
NA	NA	NA	NA	NA	NA	NA	#N/A	#N/A
NA	NA	NA	NA	NA	NA	NA	#N/A	#N/A
NA	NA	NA	NA	NA	NA	NA	#N/A	#N/A
NA	NA	NA	NA	NA	NA	NA	#N/A	#N/A
NA	NA	NA	NA	NA	NA	NA	#N/A	#N/A
NA	NA	NA	NA	NA	NA	NA	#N/A	#N/A
NA	NA	NA	NA	NA	NA	NA	#N/A	#N/A
NA	NA	NA	NA	NA	NA	NA	#N/A	#N/A
NA	NA	NA	NA	NA	NA	NA	#N/A	#N/A
NA	NA	NA	NA	NA	NA	NA	#N/A	#N/A
NA	NA	NA	NA	NA	NA	NA	#N/A	#N/A
NA	NA	NA	NA	NA	NA	NA	#N/A	#N/A
NA	NA	NA	NA	NA	NA	NA	#N/A	#N/A
NA	NA	NA	NA	NA	NA	NA	#N/A	#N/A
NA	NA	NA	NA	NA	NA	NA	#N/A	#N/A
NA	NA	NA	NA	NA	NA	NA	#N/A	#N/A
NA	NA	NA	NA	NA	NA	NA	#N/A	#N/A
NA	NA	NA	NA	NA	NA	NA	#N/A	#N/A
NA	NA	NA	NA	NA	NA	NA	#N/A	#N/A
NA	NA	NA	NA	NA	NA	NA	#N/A	#N/A
NA	NA	NA	NA	NA	NA	NA	#N/A	#N/A
NA	NA	NA	NA	NA	NA	NA	#N/A	#N/A
NA	NA	NA	NA	NA	NA	NA	#N/A	#N/A
NA	NA	NA	NA	NA	NA	NA	#N/A	#N/A
NA	NA	NA	NA	NA	NA	NA	#N/A	#N/A
NA	NA	NA	NA	NA	NA	NA	#N/A	#N/A
NA	NA	NA	NA	NA	NA	NA	#N/A	#N/A
NA	NA	NA	NA	NA	NA	NA	#N/A	#N/A
NA	NA	NA	NA	NA	NA	NA	#N/A	#N/A
NA	NA	NA	NA	NA	NA	NA	#N/A	#N/A
NA	NA	NA	NA	NA	NA	NA	#N/A	#N/A
NA	NA	NA	NA	NA	NA	NA	#N/A	#N/A
NA	NA	NA	NA	NA	NA	NA	#N/A	#N/A
NA	NA	NA	NA	NA	NA	NA	#N/A	#N/A
NA	NA	NA	NA	NA	NA	NA	#N/A	#N/A
NA	NA	NA	NA	NA	NA	NA	#N/A	#N/A
NA	NA	NA	NA	NA	NA	NA	#N/A	#N/A
NA	NA	NA	NA	NA	NA	NA	#N/A	#N/A
NA	NA	NA	NA	NA	NA	NA	#N/A	#N/A
NA	NA	NA	NA	NA	NA	NA	#N/A	#N/A
NA	NA	NA	NA	NA	NA	NA	#N/A	#N/A
NA	NA	NA	NA	NA	NA	NA	#N/A	#N/A
NA	NA	NA	NA	NA	NA	NA	#N/A	#N/A
NA	NA	NA	NA	NA	NA	NA	#N/A	#N/A
NA	NA	NA	NA	NA	NA	NA	#N/A	#N/A
NA	NA	NA	NA	NA	NA	NA	#N/A	#N/A
NA	NA	NA	NA	NA	NA	NA	#N/A	#N/A
NA	NA	NA	NA	NA	NA	NA	#N/A	#N/A
NA	NA	NA	NA	NA	NA	NA	#N/A	#N/A
NA	NA	NA	NA	NA	NA	NA	#N/A	#N/A
NA	NA	NA	NA	NA	NA	NA	#N/A	#N/A
NA	NA	NA	NA	NA	NA	NA	#N/A	#N/A
NA	NA	NA	NA	NA	NA	NA	#N/A	#N/A
NA	NA	NA	NA	NA	NA	NA	#N/A	#N/A
NA	NA	NA	NA	NA	NA	NA	#N/A	#N/A
NA	NA	NA	NA	NA	NA	NA	#N/A	#N/A
NA	NA	NA	NA	NA	NA	NA	#N/A	#N/A
NA	NA	NA	NA	NA	NA	NA	#N/A	#N/A
NA	NA	NA	NA	NA	NA	NA	#N/A	#N/A
NA	NA	NA	NA	NA	NA	NA	#N/A	#N/A
NA	NA	NA	NA	NA	NA	NA	#N/A	#N/A
NA	NA	NA	NA	NA	NA	NA	#N/A	#N/A
NA	NA	NA	NA	NA	NA	NA	#N/A	#N/A
NA	NA	NA	NA	NA	NA	NA	#N/A	#N/A
NA	NA	NA	NA	NA	NA	NA	#N/A	#N/A
NA	NA	NA	NA	NA	NA	NA	#N/A	#N/A
NA	NA	NA	NA	NA	NA	NA	#N/A	#N/A
NA	NA	NA	NA	NA	NA	NA	#N/A	#N/A
NA	NA	NA	NA	NA	NA	NA	#N/A	#N/A
NA	NA	NA	NA	NA	NA	NA	#N/A	#N/A
NA	NA	NA	NA	NA	NA	NA	#N/A	#N/A
NA	NA	NA	NA	NA	NA	NA	#N/A	#N/A
NA	NA	NA	NA	NA	NA	NA	#N/A	#N/A
NA	NA	NA	NA	NA	NA	NA	#N/A	#N/A
NA	NA	NA	NA	NA	NA	NA	#N/A	#N/A
NA	NA	NA	NA	NA	NA	NA	#N/A	#N/A
NA	NA	NA	NA	NA	NA	NA	#N/A	#N/A
NA	NA	NA	NA	NA	NA	NA	#N/A	#N/A
NA	NA	NA	NA	NA	NA	NA	#N/A	#N/A
NA	NA	NA	NA	NA	NA	NA	#N/A	#N/A
NA	NA	NA	NA	NA	NA	NA	#N/A	#N/A
NA	NA	NA	NA	NA	NA	NA	#N/A	#N/A
NA	NA	NA	NA	NA	NA	NA	#N/A	#N/A
NA	NA	NA	NA	NA	NA	NA	#N/A	#N/A
NA	NA	NA	NA	NA	NA	NA	#N/A	#N/A
NA	NA	NA	NA	NA	NA	NA	#N/A	#N/A
NA	NA	NA	NA	NA	NA	NA	#N/A	#N/A
NA	NA	NA	NA	NA	NA	NA	#N/A	#N/A
NA	NA	NA	NA	NA	NA	NA	#N/A	#N/A
NA	NA	NA	NA	NA	NA	NA	#N/A	#N/A
NA	NA	NA	NA	NA	NA	NA	#N/A	#N/A
NA	NA	NA	NA	NA	NA	NA	#N/A	#N/A
NA	NA	NA	NA	NA	NA	NA	#N/A	#N/A
NA	NA	NA	NA	NA	NA	NA	#N/A	#N/A
NA	NA	NA	NA	NA	NA	NA	#N/A	#N/A
NA	NA	NA	NA	NA	NA	NA	#N/A	#N/A
NA	NA	NA	NA	NA	NA	NA	#N/A	#N/A
NA	NA	NA	NA	NA	NA	NA	#N/A	#N/A
NA	NA	NA	NA	NA	NA	NA	#N/A	#N/A
NA	NA	NA	NA	NA	NA	NA	#N/A	#N/A
NA	NA	NA	NA	NA	NA	NA	#N/A	#N/A
NA	NA	NA	NA	NA	NA	NA	#N/A	#N/A
NA	NA	NA	NA	NA	NA	NA	#N/A	#N/A
NA	NA	NA	NA	NA	NA	NA	#N/A	#N/A
NA	NA	NA	NA	NA	NA	NA	#N/A	#N/A
NA	NA	NA	NA	NA	NA	NA	#N/A	#N/A
NA	NA	NA	NA	NA	NA	NA	#N/A	#N/A
NA	NA	NA	NA	NA	NA	NA	#N/A	#N/A
NA	NA	NA	NA	NA	NA	NA	#N/A	#N/A
NA	NA	NA	NA	NA	NA	NA	#N/A	#N/A
NA	NA	NA	NA	NA	NA	NA	#N/A	#N/A
NA	NA	NA	NA	NA	NA	NA	#N/A	#N/A
NA	NA	NA	NA	NA	NA	NA	#N/A	#N/A
NA	NA	NA	NA	NA	NA	NA	#N/A	#N/A
NA	NA	NA	NA	NA	NA	NA	#N/A	#N/A
NA	NA	NA	NA	NA	NA	NA	#N/A	#N/A
NA	NA	NA	NA	NA	NA	NA	#N/A	#N/A
NA	NA	NA	NA	NA	NA	NA	#N/A	#N/A
NA	NA	NA	NA	NA	NA	NA	#N/A	#N/A
NA	NA	NA	NA	NA	NA	NA	#N/A	#N/A
NA	NA	NA	NA	NA	NA	NA	#N/A	#N/A
NA	NA	NA	NA	NA	NA	NA	#N/A	#N/A
NA	NA	NA	NA	NA	NA	NA	#N/A	#N/A
NA	NA	NA	NA	NA	NA	NA	#N/A	#N/A
NA	NA	NA	NA	NA	NA	NA	#N/A	#N/A
NA	NA	NA	NA	NA	NA	NA	#N/A	#N/A
NA	NA	NA	NA	NA	NA	NA	#N/A	#N/A
NA	NA	NA	NA	NA	NA	NA	#N/A	#N/A
NA	NA	NA	NA	NA	NA	NA	#N/A	#N/A
NA	NA	NA	NA	NA	NA	NA	#N/A	#N/A
NA	NA	NA	NA	NA	NA	NA	#N/A	#N/A
NA	NA	NA	NA	NA	NA	NA	#N/A	#N/A
NA	NA	NA	NA	NA	NA	NA	#N/A	#N/A
NA	NA	NA	NA	NA	NA	NA	#N/A	#N/A
NA	NA	NA	NA	NA	NA	NA	#N/A	#N/A
NA	NA	NA	NA	NA	NA	NA	#N/A	#N/A
NA	NA	NA	NA	NA	NA	NA	#N/A	#N/A
NA	NA	NA	NA	NA	NA	NA	#N/A	#N/A
NA	NA	NA	NA	NA	NA	NA	#N/A	#N/A
NA	NA	NA	NA	NA	NA	NA	#N/A	#N/A
NA	NA	NA	NA	NA	NA	NA	#N/A	#N/A
NA	NA	NA	NA	NA	NA	NA	#N/A	#N/A
NA	NA	NA	NA	NA	NA	NA	#N/A	#N/A
NA	NA	NA	NA	NA	NA	NA	#N/A	#N/A
NA	NA	NA	NA	NA	NA	NA	#N/A	#N/A
NA	NA	NA	NA	NA	NA	NA	#N/A	#N/A
NA	NA	NA	NA	NA	NA	NA	#N/A	#N/A
NA	NA	NA	NA	NA	NA	NA	#N/A	#N/A
NA	NA	NA	NA	NA	NA	NA	#N/A	#N/A
NA	NA	NA	NA	NA	NA	NA	#N/A	#N/A
NA	NA	NA	NA	NA	NA	NA	#N/A	#N/A
NA	NA	NA	NA	NA	NA	NA	#N/A	#N/A
NA	NA	NA	NA	NA	NA	NA	#N/A	#N/A
NA	NA	NA	NA	NA	NA	NA	#N/A	#N/A
NA	NA	NA	NA	NA	NA	NA	#N/A	#N/A
NA	NA	NA	NA	NA	NA	NA	#N/A	#N/A
NA	NA	NA	NA	NA	NA	NA	#N/A	#N/A
NA	NA	NA	NA	NA	NA	NA	#N/A	#N/A
NA	NA	NA	NA	NA	NA	NA	#N/A	#N/A
NA	NA	NA	NA	NA	NA	NA	#N/A	#N/A
NA	NA	NA	NA	NA	NA	NA	#N/A	#N/A
NA	NA	NA	NA	NA	NA	NA	#N/A	#N/A
NA	NA	NA	NA	NA	NA	NA	#N/A	#N/A
NA	NA	NA	NA	NA	NA	NA	#N/A	#N/A
NA	NA	NA	NA	NA	NA	NA	#N/A	#N/A
NA	NA	NA	NA	NA	NA	NA	#N/A	#N/A
NA	NA	NA	NA	NA	NA	NA	#N/A	#N/A
NA	NA	NA	NA	NA	NA	NA	#N/A	#N/A
NA	NA	NA	NA	NA	NA	NA	#N/A	#N/A
NA	NA	NA	NA	NA	NA	NA	#N/A	#N/A
NA	NA	NA	NA	NA	NA	NA	#N/A	#N/A
NA	NA	NA	NA	NA	NA	NA	#N/A	#N/A
NA	NA	NA	NA	NA	NA	NA	#N/A	#N/A
NA	NA	NA	NA	NA	NA	NA	#N/A	#N/A
NA	NA	NA	NA	NA	NA	NA	#N/A	#N/A
NA	NA	NA	NA	NA	NA	NA	#N/A	#N/A
NA	NA	NA	NA	NA	NA	NA	#N/A	#N/A
NA	NA	NA	NA	NA	NA	NA	#N/A	#N/A
NA	NA	NA	NA	NA	NA	NA	#N/A	#N/A
NA	NA	NA	NA	NA	NA	NA	#N/A	#N/A
NA	NA	NA	NA	NA	NA	NA	#N/A	#N/A
NA	NA	NA	NA	NA	NA	NA	#N/A	#N/A
NA	NA	NA	NA	NA	NA	NA	#N/A	#N/A
NA	NA	NA	NA	NA	NA	NA	#N/A	#N/A
NA	NA	NA	NA	NA	NA	NA	#N/A	#N/A
NA	NA	NA	NA	NA	NA	NA	#N/A	#N/A
NA	NA	NA	NA	NA	NA	NA	#N/A	#N/A
NA	NA	NA	NA	NA	NA	NA	#N/A	#N/A
NA	NA	NA	NA	NA	NA	NA	#N/A	#N/A
NA	NA	NA	NA	NA	NA	NA	#N/A	#N/A
NA	NA	NA	NA	NA	NA	NA	#N/A	#N/A
NA	NA	NA	NA	NA	NA	NA	#N/A	#N/A
NA	NA	NA	NA	NA	NA	NA	#N/A	#N/A
NA	NA	NA	NA	NA	NA	NA	#N/A	#N/A
NA	NA	NA	NA	NA	NA	NA	#N/A	#N/A
NA	NA	NA	NA	NA	NA	NA	#N/A	#N/A
NA	NA	NA	NA	NA	NA	NA	#N/A	#N/A
NA	NA	NA	NA	NA	NA	NA	#N/A	#N/A
NA	NA	NA	NA	NA	NA	NA	#N/A	#N/A
NA	NA	NA	NA	NA	NA	NA	#N/A	#N/A
NA	NA	NA	NA	NA	NA	NA	#N/A	#N/A
NA	NA	NA	NA	NA	NA	NA	#N/A	#N/A
NA	NA	NA	NA	NA	NA	NA	#N/A	#N/A
NA	NA	NA	NA	NA	NA	NA	#N/A	#N/A
NA	NA	NA	NA	NA	NA	NA	#N/A	#N/A
NA	NA	NA	NA	NA	NA	NA	#N/A	#N/A
NA	NA	NA	NA	NA	NA	NA	#N/A	#N/A
NA	NA	NA	NA	NA	NA	NA	#N/A	#N/A
NA	NA	NA	NA	NA	NA	NA	#N/A	#N/A
NA	NA	NA	NA	NA	NA	NA	#N/A	#N/A
NA	NA	NA	NA	NA	NA	NA	#N/A	#N/A
NA	NA	NA	NA	NA	NA	NA	#N/A	#N/A
NA	NA	NA	NA	NA	NA	NA	#N/A	#N/A
NA	NA	NA	NA	NA	NA	NA	#N/A	#N/A
NA	NA	NA	NA	NA	NA	NA	#N/A	#N/A
NA	NA	NA	NA	NA	NA	NA	#N/A	#N/A
NA	NA	NA	NA	NA	NA	NA	#N/A	#N/A
NA	NA	NA	NA	NA	NA	NA	#N/A	#N/A
NA	NA	NA	NA	NA	NA	NA	#N/A	#N/A
NA	NA	NA	NA	NA	NA	NA	#N/A	#N/A
NA	NA	NA	NA	NA	NA	NA	#N/A	#N/A
NA	NA	NA	NA	NA	NA	NA	#N/A	#N/A
NA	NA	NA	NA	NA	NA	NA	#N/A	#N/A
NA	NA	NA	NA	NA	NA	NA	#N/A	#N/A
NA	NA	NA	NA	NA	NA	NA	#N/A	#N/A
NA	NA	NA	NA	NA	NA	NA	#N/A	#N/A
NA	NA	NA	NA	NA	NA	NA	#N/A	#N/A
NA	NA	NA	NA	NA	NA	NA	#N/A	#N/A
NA	NA	NA	NA	NA	NA	NA	#N/A	#N/A
NA	NA	NA	NA	NA	NA	NA	#N/A	#N/A
NA	NA	NA	NA	NA	NA	NA	#N/A	#N/A
NA	NA	NA	NA	NA	NA	NA	#N/A	#N/A
NA	NA	NA	NA	NA	NA	NA	#N/A	#N/A
NA	NA	NA	NA	NA	NA	NA	#N/A	#N/A
NA	NA	NA	NA	NA	NA	NA	#N/A	#N/A
NA	NA	NA	NA	NA	NA	NA	#N/A	#N/A
NA	NA	NA	NA	NA	NA	NA	#N/A	#N/A
NA	NA	NA	NA	NA	NA	NA	#N/A	#N/A
NA	NA	NA	NA	NA	NA	NA	#N/A	#N/A
NA	NA	NA	NA	NA	NA	NA	#N/A	#N/A
NA	NA	NA	NA	NA	NA	NA	#N/A	#N/A
NA	NA	NA	NA	NA	NA	NA	#N/A	#N/A
NA	NA	NA	NA	NA	NA	NA	#N/A	#N/A
NA	NA	NA	NA	NA	NA	NA	#N/A	#N/A
NA	NA	NA	NA	NA	NA	NA	#N/A	#N/A
NA	NA	NA	NA	NA	NA	NA	#N/A	#N/A
NA	NA	NA	NA	NA	NA	NA	#N/A	#N/A
NA	NA	NA	NA	NA	NA	NA	#N/A	#N/A
NA	NA	NA	NA	NA	NA	NA	#N/A	#N/A
NA	NA	NA	NA	NA	NA	NA	#N/A	#N/A
NA	NA	NA	NA	NA	NA	NA	#N/A	#N/A
NA	NA	NA	NA	NA	NA	NA	#N/A	#N/A
NA	NA	NA	NA	NA	NA	NA	#N/A	#N/A
NA	NA	NA	NA	NA	NA	NA	#N/A	#N/A
NA	NA	NA	NA	NA	NA	NA	#N/A	#N/A
NA	NA	NA	NA	NA	NA	NA	#N/A	#N/A
NA	NA	NA	NA	NA	NA	NA	#N/A	#N/A
NA	NA	NA	NA	NA	NA	NA	#N/A	#N/A
NA	NA	NA	NA	NA	NA	NA	#N/A	#N/A
NA	NA	NA	NA	NA	NA	NA	#N/A	#N/A
NA	NA	NA	NA	NA	NA	NA	#N/A	#N/A
NA	NA	NA	NA	NA	NA	NA	#N/A	#N/A
NA	NA	NA	NA	NA	NA	NA	#N/A	#N/A
NA	NA	NA	NA	NA	NA	NA	#N/A	#N/A
NA	NA	NA	NA	NA	NA	NA	#N/A	#N/A
NA	NA	NA	NA	NA	NA	NA	#N/A	#N/A
NA	NA	NA	NA	NA	NA	NA	#N/A	#N/A
NA	NA	NA	NA	NA	NA	NA	#N/A	#N/A
NA	NA	NA	NA	NA	NA	NA	#N/A	#N/A
NA	NA	NA	NA	NA	NA	NA	#N/A	#N/A
NA	NA	NA	NA	NA	NA	NA	#N/A	#N/A
NA	NA	NA	NA	NA	NA	NA	#N/A	#N/A
NA	NA	NA	NA	NA	NA	NA	#N/A	#N/A
NA	NA	NA	NA	NA	NA	NA	#N/A	#N/A
NA	NA	NA	NA	NA	NA	NA	#N/A	#N/A
NA	NA	NA	NA	NA	NA	NA	#N/A	#N/A
NA	NA	NA	NA	NA	NA	NA	#N/A	#N/A
NA	NA	NA	NA	NA	NA	NA	#N/A	#N/A
NA	NA	NA	NA	NA	NA	NA	#N/A	#N/A
NA	NA	NA	NA	NA	NA	NA	#N/A	#N/A
NA	NA	NA	NA	NA	NA	NA	#N/A	#N/A
NA	NA	NA	NA	NA	NA	NA	#N/A	#N/A
NA	NA	NA	NA	NA	NA	NA	#N/A	#N/A
NA	NA	NA	NA	NA	NA	NA	#N/A	#N/A
NA	NA	NA	NA	NA	NA	NA	#N/A	#N/A
NA	NA	NA	NA	NA	NA	NA	#N/A	#N/A
NA	NA	NA	NA	NA	NA	NA	#N/A	#N/A
NA	NA	NA	NA	NA	NA	NA	#N/A	#N/A
NA	NA	NA	NA	NA	NA	NA	#N/A	#N/A
NA	NA	NA	NA	NA	NA	NA	#N/A	#N/A
NA	NA	NA	NA	NA	NA	NA	#N/A	#N/A
NA	NA	NA	NA	NA	NA	NA	#N/A	#N/A
NA	NA	NA	NA	NA	NA	NA	#N/A	#N/A
NA	NA	NA	NA	NA	NA	NA	#N/A	#N/A
NA	NA	NA	NA	NA	NA	NA	#N/A	#N/A
NA	NA	NA	NA	NA	NA	NA	#N/A	#N/A
NA	NA	NA	NA	NA	NA	NA	#N/A	#N/A
NA	NA	NA	NA	NA	NA	NA	#N/A	#N/A
NA	NA	NA	NA	NA	NA	NA	#N/A	#N/A
NA	NA	NA	NA	NA	NA	NA	#N/A	#N/A
NA	NA	NA	NA	NA	NA	NA	#N/A	#N/A
NA	NA	NA	NA	NA	NA	NA	#N/A	#N/A
NA	NA	NA	NA	NA	NA	NA	#N/A	#N/A
NA	NA	NA	NA	NA	NA	NA	#N/A	#N/A
NA	NA	NA	NA	NA	NA	NA	#N/A	#N/A
NA	NA	NA	NA	NA	NA	NA	#N/A	#N/A
NA	NA	NA	NA	NA	NA	NA	#N/A	#N/A
NA	NA	NA	NA	NA	NA	NA	#N/A	#N/A
NA	NA	NA	NA	NA	NA	NA	#N/A	#N/A
NA	NA	NA	NA	NA	NA	NA	#N/A	#N/A
NA	NA	NA	NA	NA	NA	NA	#N/A	#N/A
NA	NA	NA	NA	NA	NA	NA	#N/A	#N/A
NA	NA	NA	NA	NA	NA	NA	#N/A	#N/A
NA	NA	NA	NA	NA	NA	NA	#N/A	#N/A
NA	NA	NA	NA	NA	NA	NA	#N/A	#N/A
NA	NA	NA	NA	NA	NA	NA	#N/A	#N/A
NA	NA	NA	NA	NA	NA	NA	#N/A	#N/A
NA	NA	NA	NA	NA	NA	NA	#N/A	#N/A
NA	NA	NA	NA	NA	NA	NA	#N/A	#N/A
NA	NA	NA	NA	NA	NA	NA	#N/A	#N/A
NA	NA	NA	NA	NA	NA	NA	#N/A	#N/A
NA	NA	NA	NA	NA	NA	NA	#N/A	#N/A
NA	NA	NA	NA	NA	NA	NA	#N/A	#N/A
NA	NA	NA	NA	NA	NA	NA	#N/A	#N/A
NA	NA	NA	NA	NA	NA	NA	#N/A	#N/A
NA	NA	NA	NA	NA	NA	NA	#N/A	#N/A
NA	NA	NA	NA	NA	NA	NA	#N/A	#N/A
NA	NA	NA	NA	NA	NA	NA	#N/A	#N/A
NA	NA	NA	NA	NA	NA	NA	#N/A	#N/A

## Sheet: Table S1b
Table S1b. DPA analysis of transcriptional reponse of E. coli to anaerobic growth: genes that up-regulated under anaerobic conditions
	gene.index	RP/Rsum	FC:(class1/class2)	pfp	P.value	met	FullName	KeggID	COMMENT
ca2[c]	476	1	0.6353	0.4065	0.0002	ca2	Calcium	C00076	mineral
cl[c]	516	2	0.6358	0.6045	0.0007	cl	Chloride	C00115	mineral
anhgm4p[c]	405	5.5	0.7361	0.7497	0.0025	anhgm4p	N-Acetyl-D-glucosamine(anhydrous)N-Acetylmuramyl-tetrapeptide	0	peptidoglycan synthesis
anhm4p[c]	411	5.5	0.7361	0.7497	0.0025	anhm4p	1,6-anhydrous-N-Acetylmuramyl-tetrapeptide	0	peptidoglycan synthesis
anhgm4p[p]	406	5.5	0.7361	0.7497	0.0025	anhgm4p	N-Acetyl-D-glucosamine(anhydrous)N-Acetylmuramyl-tetrapeptide	0	peptidoglycan synthesis
co2[c]	529	11	0.7425	0.8039	0.0053	co2	CO2	C00011	carbon dioxide
co2[e]	530	11	0.7425	0.8039	0.0053	co2	CO2	C00011	carbon dioxide
glucys[c]	885	11	0.7425	0.8039	0.0053	glucys	gamma-L-Glutamyl-L-cysteine	C00669	Glutathione metabolism
co2[p]	531	11	0.7425	0.8039	0.0053	co2	CO2	C00011	carbon dioxide
cys-L[c]	579	11	0.7425	0.8039	0.0053	cys-L	L-Cysteine	C00097	amino acid
cys-L[e]	580	11	0.7425	0.8039	0.0053	cys-L	L-Cysteine	C00097	amino acid
cys-L[p]	581	11	0.7425	0.8039	0.0053	cys-L	L-Cysteine	C00097	amino acid
LalaDgluMdapDala[e]	280	19	0.747	0.8514	0.0097	LalaDgluMdapDala	L-alanine-D-glutamate-meso-2,6-diaminoheptanedioate-D-alanine	0	peptidoglycan synthesis
LalaDgluMdapDala[p]	281	19	0.747	0.8514	0.0097	LalaDgluMdapDala	L-alanine-D-glutamate-meso-2,6-diaminoheptanedioate-D-alanine	0	peptidoglycan synthesis
LalaDgluMdapDala[c]	279	19	0.747	0.8514	0.0097	LalaDgluMdapDala	L-alanine-D-glutamate-meso-2,6-diaminoheptanedioate-D-alanine	0	peptidoglycan synthesis
anhgm3p[c]	403	19	0.747	0.8514	0.0097	anhgm3p	N-Acetyl-D-glucosamine(anhydrous)N-Acetylmuramyl-tripeptide	0	peptidoglycan synthesis
anhgm3p[p]	404	19	0.747	0.8514	0.0097	anhgm3p	N-Acetyl-D-glucosamine(anhydrous)N-Acetylmuramyl-tripeptide	0	peptidoglycan synthesis
anhm3p[c]	410	19	0.747	0.8514	0.0097	anhm3p	1,6-anhydrous-N-Acetylmuramyl-tripeptide	0	peptidoglycan synthesis
gthox[c]	926	25	0.7511	0.8892	0.0133	gthox	Oxidized glutathione	C00127	Glutathione metabolism
gthrd[c]	929	25	0.7511	0.8892	0.0133	gthrd	Reduced glutathione	C00051	Glutathione metabolism
5dglcn[c]	262	28	0.7539	0.8981	0.0151	5dglcn	5-Dehydro-D-gluconate	C01062	pentose phosphate cycle
5dglcn[e]	263	28	0.7539	0.8981	0.0151	5dglcn	5-Dehydro-D-gluconate	C01062	pentose phosphate cycle
5dglcn[p]	264	28	0.7539	0.8981	0.0151	5dglcn	5-Dehydro-D-gluconate	C01062	pentose phosphate cycle
anhgm[e]	408	30.5	0.7565	0.9138	0.0167	anhgm	N-Acetyl-D-glucosamine(anhydrous)N-Acetylmuramic acid	0	peptidoglycan synthesis
anhgm[p]	409	30.5	0.7565	0.9138	0.0167	anhgm	N-Acetyl-D-glucosamine(anhydrous)N-Acetylmuramic acid	0	peptidoglycan synthesis
gtspmd[c]	935	32	0.7598	0.9258	0.0178	gtspmd	Glutathionylspermidine	C05730	Glutathione metabolism
gthrd[p]	931	33.5	0.7605	0.926	0.0186	gthrd	Reduced glutathione	C00051	Glutathione metabolism
gthrd[e]	930	33.5	0.7605	0.926	0.0186	gthrd	Reduced glutathione	C00051	Glutathione metabolism
cgly[e]	504	35.5	0.7611	0.9392	0.02	cgly	Cys-Gly	C01419	Glutathione metabolism
cgly[p]	505	35.5	0.7611	0.9392	0.02	cgly	Cys-Gly	C01419	Glutathione metabolism
h2s[p]	951	38	0.7637	0.941	0.0214	h2s	Hydrogen sulfide	C00283	anaerobic respiration
h2s[e]	950	38	0.7637	0.941	0.0214	h2s	Hydrogen sulfide	C00283	anaerobic respiration
h2s[c]	949	38	0.7637	0.941	0.0214	h2s	Hydrogen sulfide	C00283	anaerobic respiration
cbl1[p]	486	40	0.7654	0.9399	0.0225	cbl1	Cob(I)alamin	C00853	cofactor
anhm[c]	412	41.5	0.766	0.9603	0.0239	anhm	1,6-anhydrous-N-Acetylmuramate	0	peptidoglycan synthesis
anhgm[c]	407	41.5	0.766	0.9603	0.0239	anhgm	N-Acetyl-D-glucosamine(anhydrous)N-Acetylmuramic acid	0	peptidoglycan synthesis
LalaDglu[c]	285	48.5	0.766	0.9845	0.0286	LalaDglu	L-alanine-D-glutamate	0	peptidoglycan synthesis
LalaDgluMdap[e]	283	48.5	0.766	0.9845	0.0286	LalaDgluMdap	L-alanine-D-glutamate-meso-2,6-diaminoheptanedioate	0	peptidoglycan synthesis
LalaDgluMdap[p]	284	48.5	0.766	0.9845	0.0286	LalaDgluMdap	L-alanine-D-glutamate-meso-2,6-diaminoheptanedioate	0	peptidoglycan synthesis
LalaDgluMdap[c]	282	48.5	0.766	0.9845	0.0286	LalaDgluMdap	L-alanine-D-glutamate-meso-2,6-diaminoheptanedioate	0	peptidoglycan synthesis
cgly[c]	503	55	0.7732	0.9894	0.0326	cgly	Cys-Gly	C01419	peptidoglycan synthesis
acmum6p[c]	326	58.5	0.7757	1.0323	0.0362	acmum6p	N-acetylmuramate 6-phosphate	0	Amino sugar and nucleotide sugar metabolism
acgam[c]	316	58.5	0.7757	1.0323	0.0362	acgam	N-Acetyl-D-glucosamine	C00140	peptidoglycan synthesis
alaala[e]	382	58.5	0.7757	1.0323	0.0362	alaala	D-Alanyl-D-alanine	C00993	Amino sugar and nucleotide sugar metabolism
alaala[p]	383	58.5	0.7757	1.0323	0.0362	alaala	D-Alanyl-D-alanine	C00993	Amino sugar and nucleotide sugar metabolism
ala-D[e]	376	58.5	0.7757	1.0323	0.0362	ala-D	D-Alanine	C00133	amino acid
ala-D[p]	377	58.5	0.7757	1.0323	0.0362	ala-D	D-Alanine	C00133	amino acid
1agpg120[p]	36	70.5	0.7761	1.0441	0.0441	1agpg120	1-Acyl-sn-glycero-3-phosphoglycerol (n-C12:0)	0	Glycerolipid metabolism
1agpg140[p]	37	70.5	0.7761	1.0441	0.0441	1agpg140	1-Acyl-sn-glycero-3-phosphoglycerol (n-C14:0)	0	Glycerolipid metabolism
1agpg141[p]	38	70.5	0.7761	1.0441	0.0441	1agpg141	1-Acyl-sn-glycero-3-phosphoglycerol (n-C14:1)	0	Glycerolipid metabolism
1agpg160[p]	39	70.5	0.7761	1.0441	0.0441	1agpg160	1-Acyl-sn-glycero-3-phosphoglycerol (n-C16:0)	0	Glycerolipid metabolism
1agpg180[p]	41	70.5	0.7761	1.0441	0.0441	1agpg180	1-Acyl-sn-glycero-3-phosphoglycerol (n-C18:0)	0	Glycerolipid metabolism
1agpg161[p]	40	70.5	0.7761	1.0441	0.0441	1agpg161	1-Acyl-sn-glycero-3-phosphoglycerol (n-C16:1)	0	Glycerolipid metabolism
1agpg181[p]	42	70.5	0.7761	1.0441	0.0441	1agpg181	1-Acyl-sn-glycero-3-phosphoglycerol (n-C18:1)	0	Glycerolipid metabolism
2agpg120[p]	99	70.5	0.7761	1.0441	0.0441	2agpg120	2-Acyl-sn-glycero-3-phosphoglycerol (n-C12:0)	0	Glycerolipid metabolism
2agpg180[p]	109	70.5	0.7761	1.0441	0.0441	2agpg180	2-Acyl-sn-glycero-3-phosphoglycerol (n-C18:0)	0	Glycerolipid metabolism
2agpg181[p]	111	70.5	0.7761	1.0441	0.0441	2agpg181	2-Acyl-sn-glycero-3-phosphoglycerol (n-C18:1)	0	Glycerolipid metabolism
2agpg141[p]	103	70.5	0.7761	1.0441	0.0441	2agpg141	2-Acyl-sn-glycero-3-phosphoglycerol (n-C14:1)	0	Glycerolipid metabolism
2agpg160[p]	105	70.5	0.7761	1.0441	0.0441	2agpg160	2-Acyl-sn-glycero-3-phosphoglycerol (n-C16:0)	0	Glycerolipid metabolism
2agpg161[p]	107	70.5	0.7761	1.0441	0.0441	2agpg161	2-Acyl-sn-glycero-3-phosphoglycerol (n-C16:1)	0	Glycerolipid metabolism
cpg160[c]	541	70.5	0.7761	1.0441	0.0441	cpg160	cyclopropane phosphatidylglycerol (dihexadec-9,10-cyclo-anoyl, n-C16:0 cyclo)	0	Glycerolipid metabolism
cpg180[c]	542	70.5	0.7761	1.0441	0.0441	cpg180	cyclopropane phosphatidylglycerol (dioctadec-11,12-cyclo-anoyl, n-C18:0 cyclo)	0	Glycerolipid metabolism
apg180[c]	421	70.5	0.7761	1.0441	0.0441	apg180	acyl phosphatidylglycerol (n-C18:0)	0	Glycerolipid metabolism
apg181[c]	422	70.5	0.7761	1.0441	0.0441	apg181	acyl phosphatidylglycerol (n-C18:1)	0	Glycerolipid metabolism
2agpg140[p]	101	70.5	0.7761	1.0441	0.0441	2agpg140	2-Acyl-sn-glycero-3-phosphoglycerol (n-C14:0)	0	Glycerolipid metabolism
acgam6p[c]	315	109	0.7855	1.1412	0.0746	acgam6p	N-Acetyl-D-glucosamine 6-phosphate	C00357	peptidoglycan synthesis
LalaLglu[c]	286	109	0.7855	1.1412	0.0746	LalaLglu	L-alanine-L-glutamate	0	peptidoglycan synthesis
3hodcoa[c]	200	109	0.7855	1.1412	0.0746	3hodcoa	(S)-3-Hydroxyoctadecanoyl-CoA	0	Fatty acid metabolism
3otdcoa[c]	227	109	0.7855	1.1412	0.0746	3otdcoa	3-Oxotetradecanoyl-CoA	C05261	Fatty acid metabolism
12dgr120[c]	2	109	0.7855	1.1412	0.0746	12dgr120	1,2-Diacyl-sn-glycerol (didodecanoyl, n-C12:0)	C00641	Glycerolipid metabolism
12dgr140[c]	4	109	0.7855	1.1412	0.0746	12dgr140	1,2-Diacyl-sn-glycerol (ditetradecanoyl, n-C14:0)	C00641	Glycerolipid metabolism
12dgr141[c]	6	109	0.7855	1.1412	0.0746	12dgr141	1,2-Diacyl-sn-glycerol (ditetradec-7-enoyl, n-C14:1)	C00641	Glycerolipid metabolism
12dgr160[c]	8	109	0.7855	1.1412	0.0746	12dgr160	1,2-Diacyl-sn-glycerol (dihexadecanoyl, n-C16:0)	C00641	Glycerolipid metabolism
12dgr161[c]	10	109	0.7855	1.1412	0.0746	12dgr161	1,2-Diacyl-sn-glycerol (dihexadec-9-enoyl, n-C16:1)	C00641	Glycerolipid metabolism
12dgr180[c]	12	109	0.7855	1.1412	0.0746	12dgr180	1,2-Diacyl-sn-glycerol (dioctadecanoyl, n-C18:0)	C00641	Glycerolipid metabolism
12dgr181[c]	14	109	0.7855	1.1412	0.0746	12dgr181	1,2-Diacyl-sn-glycerol (dioctadec-11-enoyl, n-C18:1)	C00641	Glycerolipid metabolism
1odecg3p[p]	52	109	0.7855	1.1412	0.0746	1odecg3p	1-octadecanoyl-sn-glycerol 3-phosphate	C00681	Glycerolipid metabolism
2agpg140[c]	100	109	0.7855	1.1412	0.0746	2agpg140	2-Acyl-sn-glycero-3-phosphoglycerol (n-C14:0)	0	Glycerolipid metabolism
2agpg181[c]	110	109	0.7855	1.1412	0.0746	2agpg181	2-Acyl-sn-glycero-3-phosphoglycerol (n-C18:1)	0	Glycerolipid metabolism
2hdec9eg3p[p]	134	109	0.7855	1.1412	0.0746	2hdec9eg3p	2-hexadec-9-enoyl-sn-glycerol 3-phosphate	C03974	Glycerolipid metabolism
2hdecg3p[p]	136	109	0.7855	1.1412	0.0746	2hdecg3p	2-hexadecanoyl-sn-glycerol 3-phosphate	C03974	Glycerolipid metabolism
2odecg3p[p]	148	109	0.7855	1.1412	0.0746	2odecg3p	2-octadecanoyl-sn-glycerol 3-phosphate	C03974	Glycerolipid metabolism
1ddecg3p[p]	44	109	0.7855	1.1412	0.0746	1ddecg3p	1-dodecanoyl-sn-glycerol 3-phosphate	C00681	Glycerolipid metabolism
1hdec9eg3p[p]	46	109	0.7855	1.1412	0.0746	1hdec9eg3p	1-hexadec-9-enoyl-sn-glycerol 3-phosphate	0	Glycerolipid metabolism
1hdecg3p[p]	48	109	0.7855	1.1412	0.0746	1hdecg3p	1-hexadecanoyl-sn-glycerol 3-phosphate	C00681	Glycerolipid metabolism
acmanap[c]	325	109	0.7855	1.1412	0.0746	acmanap	N-Acetyl-D-mannosamine 6-phosphate	C04257	Glycerolipid metabolism
2odec11eg3p[p]	146	109	0.7855	1.1412	0.0746	2odec11eg3p	2-octadec-11-enoyl-sn-glycerol 3-phosphate	C03974	Glycerolipid metabolism
2tdec7eg3p[p]	160	109	0.7855	1.1412	0.0746	2tdec7eg3p	2-tetradec-7-enoyl-sn-glycerol 3-phosphate	C03974	Glycerolipid metabolism
apg140[c]	417	109	0.7855	1.1412	0.0746	apg140	acyl phosphatidylglycerol (n-C14:0)	0	Glycerolipid metabolism
apg141[c]	418	109	0.7855	1.1412	0.0746	apg141	acyl phosphatidylglycerol (n-C14:1)	0	Glycerolipid metabolism
1odec11eg3p[p]	50	109	0.7855	1.1412	0.0746	1odec11eg3p	1-octadec-11-enoyl-sn-glycerol 3-phosphate	0	Glycerolipid metabolism
hdcoa[c]	965	109	0.7855	1.1412	0.0746	hdcoa	Hexadecenoyl-CoA (n-C16:1CoA)	0	Glycerolipid metabolism
2agpg160[c]	104	109	0.7855	1.1412	0.0746	2agpg160	2-Acyl-sn-glycero-3-phosphoglycerol (n-C16:0)	0	Glycerolipid metabolism
2tdecg3p[p]	162	109	0.7855	1.1412	0.0746	2tdecg3p	2-tetradecanoyl-sn-glycerol 3-phosphate	C03974	Glycerolipid metabolism
hdd2coa[c]	966	109	0.7855	1.1412	0.0746	hdd2coa	trans-Hexadec-2-enoyl-CoA	C05272	Glycerolipid metabolism
1tdec7eg3p[p]	55	109	0.7855	1.1412	0.0746	1tdec7eg3p	1-tetradec-7-enoyl-sn-glycerol 3-phosphate	C00681	Glycerolipid metabolism
1tdecg3p[p]	57	109	0.7855	1.1412	0.0746	1tdecg3p	1-tetradecanoyl-sn-glycerol 3-phosphate	C00681	Glycerolipid metabolism
2ddecg3p[p]	118	109	0.7855	1.1412	0.0746	2ddecg3p	2-dodecanoyl-sn-glycerol 3-phosphate	C03974	Glycerolipid metabolism
3hhdcoa[c]	194	109	0.7855	1.1412	0.0746	3hhdcoa	(S)-3-Hydroxyhexadecanoyl-CoA	C05258	Glycerolipid metabolism
apg120[c]	416	109	0.7855	1.1412	0.0746	apg120	acyl phosphatidylglycerol (n-C12:0)	0	Glycerolipid metabolism
2agpg120[c]	98	109	0.7855	1.1412	0.0746	2agpg120	2-Acyl-sn-glycero-3-phosphoglycerol (n-C12:0)	0	Glycerolipid metabolism
2agpg161[c]	106	109	0.7855	1.1412	0.0746	2agpg161	2-Acyl-sn-glycero-3-phosphoglycerol (n-C16:1)	0	Glycerolipid metabolism
3ohdcoa[c]	218	109	0.7855	1.1412	0.0746	3ohdcoa	3-Oxohexadecanoyl-CoA	C05259	Glycerolipid metabolism
3oodcoa[c]	224	109	0.7855	1.1412	0.0746	3oodcoa	3-Oxooctadecanoyl-CoA	0	Glycerolipid metabolism
2agpg141[c]	102	109	0.7855	1.1412	0.0746	2agpg141	2-Acyl-sn-glycero-3-phosphoglycerol (n-C14:1)	0	Glycerolipid metabolism
2agpg180[c]	108	109	0.7855	1.1412	0.0746	2agpg180	2-Acyl-sn-glycero-3-phosphoglycerol (n-C18:0)	0	Glycerolipid metabolism
apg160[c]	419	109	0.7855	1.1412	0.0746	apg160	acyl phosphatidylglycerol (n-C16:0)	0	Glycerolipid metabolism
apg161[c]	420	109	0.7855	1.1412	0.0746	apg161	acyl phosphatidylglycerol (n-C16:1)	0	Glycerolipid metabolism
1agpe161[p]	33	172.5	0.7957	1.236	0.1278	1agpe161	1-Acyl-sn-glycero-3-phosphoethanolamine (n-C16:1)	C04438
1agpe180[p]	34	172.5	0.7957	1.236	0.1278	1agpe180	1-Acyl-sn-glycero-3-phosphoethanolamine (n-C18:0)	C04438
1agpe181[p]	35	172.5	0.7957	1.236	0.1278	1agpe181	1-Acyl-sn-glycero-3-phosphoethanolamine (n-C18:1)	C04438
2agpe120[p]	85	172.5	0.7957	1.236	0.1278	2agpe120	2-Acyl-sn-glycero-3-phosphoethanolamine (n-C12:0)	C05973
2agpe140[p]	87	172.5	0.7957	1.236	0.1278	2agpe140	2-Acyl-sn-glycero-3-phosphoethanolamine (n-C14:0)	C05973
2agpe141[p]	89	172.5	0.7957	1.236	0.1278	2agpe141	2-Acyl-sn-glycero-3-phosphoethanolamine (n-C14:1)	C05973
2agpe160[p]	91	172.5	0.7957	1.236	0.1278	2agpe160	2-Acyl-sn-glycero-3-phosphoethanolamine (n-C16:0)	C05973
2agpe161[p]	93	172.5	0.7957	1.236	0.1278	2agpe161	2-Acyl-sn-glycero-3-phosphoethanolamine (n-C16:1)	C05973
1ddecg3p[c]	43	172.5	0.7957	1.236	0.1278	1ddecg3p	1-dodecanoyl-sn-glycerol 3-phosphate	C00681
1hdec9eg3p[c]	45	172.5	0.7957	1.236	0.1278	1hdec9eg3p	1-hexadec-9-enoyl-sn-glycerol 3-phosphate	0
1hdecg3p[c]	47	172.5	0.7957	1.236	0.1278	1hdecg3p	1-hexadecanoyl-sn-glycerol 3-phosphate	C00681
1odec11eg3p[c]	49	172.5	0.7957	1.236	0.1278	1odec11eg3p	1-octadec-11-enoyl-sn-glycerol 3-phosphate	0
1tdec7eg3p[c]	54	172.5	0.7957	1.236	0.1278	1tdec7eg3p	1-tetradec-7-enoyl-sn-glycerol 3-phosphate	C00681
2tdec7eg3p[c]	159	172.5	0.7957	1.236	0.1278	2tdec7eg3p	2-tetradec-7-enoyl-sn-glycerol 3-phosphate	C03974
2tdecg3p[c]	161	172.5	0.7957	1.236	0.1278	2tdecg3p	2-tetradecanoyl-sn-glycerol 3-phosphate	C03974
1agpe120[p]	29	172.5	0.7957	1.236	0.1278	1agpe120	1-Acyl-sn-glycero-3-phosphoethanolamine (n-C12:0)	C04438
1agpe140[p]	30	172.5	0.7957	1.236	0.1278	1agpe140	1-Acyl-sn-glycero-3-phosphoethanolamine (n-C14:0)	C04438
1agpe141[p]	31	172.5	0.7957	1.236	0.1278	1agpe141	1-Acyl-sn-glycero-3-phosphoethanolamine (n-C14:1)	C04438
1agpe160[p]	32	172.5	0.7957	1.236	0.1278	1agpe160	1-Acyl-sn-glycero-3-phosphoethanolamine (n-C16:0)	C04438
1odecg3p[c]	51	172.5	0.7957	1.236	0.1278	1odecg3p	1-octadecanoyl-sn-glycerol 3-phosphate	C00681
2hdec9eg3p[c]	133	172.5	0.7957	1.236	0.1278	2hdec9eg3p	2-hexadec-9-enoyl-sn-glycerol 3-phosphate	C03974
2hdecg3p[c]	135	172.5	0.7957	1.236	0.1278	2hdecg3p	2-hexadecanoyl-sn-glycerol 3-phosphate	C03974
2odecg3p[c]	147	172.5	0.7957	1.236	0.1278	2odecg3p	2-octadecanoyl-sn-glycerol 3-phosphate	C03974
2odec11eg3p[c]	145	172.5	0.7957	1.236	0.1278	2odec11eg3p	2-octadec-11-enoyl-sn-glycerol 3-phosphate	C03974
3ohcoa[c]	217	172.5	0.7957	1.236	0.1278	3ohcoa	3-Oxohexanoyl-CoA	C05269
alaala[c]	381	172.5	0.7957	1.236	0.1278	alaala	D-Alanyl-D-alanine	C00993
g3pg[p]	799	172.5	0.7957	1.236	0.1278	g3pg	Glycerophosphoglycerol	C03274
g3pg[e]	798	172.5	0.7957	1.236	0.1278	g3pg	Glycerophosphoglycerol	C03274
3hbcoa[c]	181	172.5	0.7957	1.236	0.1278	3hbcoa	(S)-3-Hydroxybutanoyl-CoA	C01144
1tdecg3p[c]	56	172.5	0.7957	1.236	0.1278	1tdecg3p	1-tetradecanoyl-sn-glycerol 3-phosphate	C00681
3oddcoa[c]	214	172.5	0.7957	1.236	0.1278	3oddcoa	3-Oxododecanoyl-CoA	C05263
cpe160[c]	539	172.5	0.7957	1.236	0.1278	cpe160	cyclopropane phosphatidylethanolamine (dihexadec-9,10-cyclo-anoyl, n-C16:0 cyclo)	0
2agpe181[p]	97	172.5	0.7957	1.236	0.1278	2agpe181	2-Acyl-sn-glycero-3-phosphoethanolamine (n-C18:1)	C05973
2agpe180[p]	95	172.5	0.7957	1.236	0.1278	2agpe180	2-Acyl-sn-glycero-3-phosphoethanolamine (n-C18:0)	C05973
2ddecg3p[c]	117	172.5	0.7957	1.236	0.1278	2ddecg3p	2-dodecanoyl-sn-glycerol 3-phosphate	C03974
ala-D[c]	375	172.5	0.7957	1.236	0.1278	ala-D	D-Alanine	C00133
b2coa[c]	460	172.5	0.7957	1.236	0.1278	b2coa	Crotonoyl-CoA	C00877
cdpdhdecg[c]	496	172.5	0.7957	1.236	0.1278	cdpdhdecg	CDP-1,2-dihexadecanoylglycerol	C00269
cdpdodec11eg[c]	497	172.5	0.7957	1.236	0.1278	cdpdodec11eg	CDP-1,2-dioctadec-11-enoylglycerol	C00269
cdpdodecg[c]	498	172.5	0.7957	1.236	0.1278	cdpdodecg	CDP-1,2-dioctadecanoylglycerol	C00269
cdpdtdec7eg[c]	499	172.5	0.7957	1.236	0.1278	cdpdtdec7eg	CDP-1,2-ditetradec-7-enoylglycerol	C00269
cdpdtdecg[c]	500	172.5	0.7957	1.236	0.1278	cdpdtdecg	CDP-1,2-ditetradecanoylglycerol	C00269
hx2coa[c]	992	172.5	0.7957	1.236	0.1278	hx2coa	trans-Hex-2-enoyl-CoA	C05271
hxa[c]	993	172.5	0.7957	1.236	0.1278	hxa	Hexanoate (n-C6:0)	C01585
hxa[e]	994	172.5	0.7957	1.236	0.1278	hxa	Hexanoate (n-C6:0)	C01585
hxa[p]	995	172.5	0.7957	1.236	0.1278	hxa	Hexanoate (n-C6:0)	C01585
3hhcoa[c]	193	172.5	0.7957	1.236	0.1278	3hhcoa	(S)-3-Hydroxyhexanoyl-CoA	C05268
ala-L[c]	378	172.5	0.7957	1.236	0.1278	ala-L	L-Alanine	C00041
cdpdddecg[c]	494	172.5	0.7957	1.236	0.1278	cdpdddecg	CDP-1,2-didodecanoylglycerol	C00269
cpe180[c]	540	172.5	0.7957	1.236	0.1278	cpe180	cyclopropane phosphatidylethanolamine (dioctadec-11,12-cyclo-anoyl, n-C18:0 cyclo)	0
4mpetz[c]	251	172.5	0.7957	1.236	0.1278	4mpetz	4-Methyl-5-(2-phosphoethyl)-thiazole	C04327
cdpdhdec9eg[c]	495	172.5	0.7957	1.236	0.1278	cdpdhdec9eg	CDP-1,2-dihexadec-9-enoylglycerol	C00269
clpn160[p]	522	293	0.8061	1.3891	0.244	clpn160	cardiolipin (tetrahexadecanoyl, n-C16:0)	C05980
eca4colipa[e]	697	293	0.8061	1.3891	0.244	eca4colipa	(enterobacterial common antigen)x4 core oligosaccharide lipid A	0
3hdcoa[c]	189	293	0.8061	1.3891	0.244	3hdcoa	(S)-3-Hydroxydecanoyl-CoA	C05264
3hddcoa[c]	190	293	0.8061	1.3891	0.244	3hddcoa	(S)-3-Hydroxydodecanoyl-CoA	C05262
cu2[c]	564	293	0.8061	1.3891	0.244	cu2	Cu2+	0
3hpppn[p]	204	293	0.8061	1.3891	0.244	3hpppn	3-(3-hydroxy-phenyl)propionate	0
eca4colipa[p]	698	293	0.8061	1.3891	0.244	eca4colipa	(enterobacterial common antigen)x4 core oligosaccharide lipid A	0
2agpe120[c]	84	293	0.8061	1.3891	0.244	2agpe120	2-Acyl-sn-glycero-3-phosphoethanolamine (n-C12:0)	C05973
2agpe140[c]	86	293	0.8061	1.3891	0.244	2agpe140	2-Acyl-sn-glycero-3-phosphoethanolamine (n-C14:0)	C05973
2agpe141[c]	88	293	0.8061	1.3891	0.244	2agpe141	2-Acyl-sn-glycero-3-phosphoethanolamine (n-C14:1)	C05973
2agpe160[c]	90	293	0.8061	1.3891	0.244	2agpe160	2-Acyl-sn-glycero-3-phosphoethanolamine (n-C16:0)	C05973
2agpe161[c]	92	293	0.8061	1.3891	0.244	2agpe161	2-Acyl-sn-glycero-3-phosphoethanolamine (n-C16:1)	C05973
3htdcoa[c]	205	293	0.8061	1.3891	0.244	3htdcoa	(S)-3-Hydroxytetradecanoyl-CoA	C05260
3oocoa[c]	221	293	0.8061	1.3891	0.244	3oocoa	3-Oxooctanoyl-CoA	C05267
12dgr120[p]	3	293	0.8061	1.3891	0.244	12dgr120	1,2-Diacyl-sn-glycerol (didodecanoyl, n-C12:0)	C00641
12dgr140[p]	5	293	0.8061	1.3891	0.244	12dgr140	1,2-Diacyl-sn-glycerol (ditetradecanoyl, n-C14:0)	C00641
12dgr141[p]	7	293	0.8061	1.3891	0.244	12dgr141	1,2-Diacyl-sn-glycerol (ditetradec-7-enoyl, n-C14:1)	C00641
12dgr160[p]	9	293	0.8061	1.3891	0.244	12dgr160	1,2-Diacyl-sn-glycerol (dihexadecanoyl, n-C16:0)	C00641
12dgr161[p]	11	293	0.8061	1.3891	0.244	12dgr161	1,2-Diacyl-sn-glycerol (dihexadec-9-enoyl, n-C16:1)	C00641
12dgr180[p]	13	293	0.8061	1.3891	0.244	12dgr180	1,2-Diacyl-sn-glycerol (dioctadecanoyl, n-C18:0)	C00641
12dgr181[p]	15	293	0.8061	1.3891	0.244	12dgr181	1,2-Diacyl-sn-glycerol (dioctadec-11-enoyl, n-C18:1)	C00641
cbl1[c]	484	293	0.8061	1.3891	0.244	cbl1	Cob(I)alamin	C00853
clpn181[p]	525	293	0.8061	1.3891	0.244	clpn181	cardiolipin (tetraoctadec-11-enoyl, n-C18:1)	C05980
cobalt2[p]	535	293	0.8061	1.3891	0.244	cobalt2	Co2+	C00175
dhor-S[c]	636	293	0.8061	1.3891	0.244	dhor-S	(S)-Dihydroorotate	C00337
duri[e]	689	293	0.8061	1.3891	0.244	duri	Deoxyuridine	C00526
g3pe[e]	795	293	0.8061	1.3891	0.244	g3pe	sn-Glycero-3-phosphoethanolamine	C01233
g3pg[c]	797	293	0.8061	1.3891	0.244	g3pg	Glycerophosphoglycerol	C03274
glyc3p[p]	901	293	0.8061	1.3891	0.244	glyc3p	Glycerol 3-phosphate	C00093
glyc[c]	905	293	0.8061	1.3891	0.244	glyc	Glycerol	C00116
glyc[e]	906	293	0.8061	1.3891	0.244	glyc	Glycerol	C00116
glyc[p]	907	293	0.8061	1.3891	0.244	glyc	Glycerol	C00116
hdcea[c]	962	293	0.8061	1.3891	0.244	hdcea	Hexadecenoate (n-C16:1)	0
14glucan[c]	23	293	0.8061	1.3891	0.244	14glucan	1,4-alpha-D-glucan	0
14glucan[e]	24	293	0.8061	1.3891	0.244	14glucan	1,4-alpha-D-glucan	0
14glucan[p]	25	293	0.8061	1.3891	0.244	14glucan	1,4-alpha-D-glucan	0
2agpe180[c]	94	293	0.8061	1.3891	0.244	2agpe180	2-Acyl-sn-glycero-3-phosphoethanolamine (n-C18:0)	C05973
dcacoa[c]	603	293	0.8061	1.3891	0.244	dcacoa	Decanoyl-CoA (n-C10:0CoA)	C05274
g3pe[p]	796	293	0.8061	1.3891	0.244	g3pe	sn-Glycero-3-phosphoethanolamine	C01233
acetol[c]	305	293	0.8061	1.3891	0.244	acetol	Acetol	C05235
dca[c]	600	293	0.8061	1.3891	0.244	dca	Decanoate (n-C10:0)	C01571
hkntd[c]	981	293	0.8061	1.3891	0.244	hkntd	2-hydroxy-6-ketononatrienedioate	0
duri[p]	690	293	0.8061	1.3891	0.244	duri	Deoxyuridine	C00526
dd2coa[c]	613	293	0.8061	1.3891	0.244	dd2coa	trans-Dodec-2-enoyl-CoA	C03221
ddca[c]	615	293	0.8061	1.3891	0.244	ddca	Dodecanoate (n-C12:0)	C02679
glyald[e]	892	293	0.8061	1.3891	0.244	glyald	D-Glyceraldehyde	C00577
gsn[p]	925	293	0.8061	1.3891	0.244	gsn	Guanosine	C00387
cu2[p]	566	293	0.8061	1.3891	0.244	cu2	Cu2+	0
ascb-L[p]	444	293	0.8061	1.3891	0.244	ascb-L	L-Ascorbate	C00072
3odcoa[c]	213	293	0.8061	1.3891	0.244	3odcoa	3-Oxodecanoyl-CoA	C05265
clpn140[p]	520	293	0.8061	1.3891	0.244	clpn140	cardiolipin (tetratetradecanoyl, n-C14:0)	C05980
clpn141[p]	521	293	0.8061	1.3891	0.244	clpn141	cardiolipin (tetratetradec-7-enoyl, n-C14:1)	C05980
dc2coa[c]	598	293	0.8061	1.3891	0.244	dc2coa	trans-Dec-2-enoyl-CoA	C05275
fe3[p]	732	293	0.8061	1.3891	0.244	fe3	Fe3+	0
34hpp[c]	166	293	0.8061	1.3891	0.244	34hpp	3-(4-Hydroxyphenyl)pyruvate	C01179
btcoa[c]	465	293	0.8061	1.3891	0.244	btcoa	Butanoyl-CoA	C00136
cl[p]	518	293	0.8061	1.3891	0.244	cl	Chloride	C00115
clpn120[p]	519	293	0.8061	1.3891	0.244	clpn120	cardiolipin (tetradodecanoyl, n-C12:0)	C05980
fe3[e]	731	293	0.8061	1.3891	0.244	fe3	Fe3+	0
etoh[c]	712	293	0.8061	1.3891	0.244	etoh	Ethanol	C00469
dad-2[e]	588	293	0.8061	1.3891	0.244	dad-2	Deoxyadenosine	C00559
dad-2[p]	589	293	0.8061	1.3891	0.244	dad-2	Deoxyadenosine	C00559
4ppcys[c]	255	293	0.8061	1.3891	0.244	4ppcys	N-((R)-4-Phosphopantothenoyl)-L-cysteine	C04352
acmalt[c]	321	293	0.8061	1.3891	0.244	acmalt	Acetyl-maltose	C02130
clpn161[p]	523	293	0.8061	1.3891	0.244	clpn161	cardiolipin (tetrahexadec-9-enoyl, n-C16:1)	C05980
etoh[e]	713	293	0.8061	1.3891	0.244	etoh	Ethanol	C00469
etoh[p]	714	293	0.8061	1.3891	0.244	etoh	Ethanol	C00469
fru[p]	773	293	0.8061	1.3891	0.244	fru	D-Fructose	C00095
ddcacoa[c]	618	293	0.8061	1.3891	0.244	ddcacoa	Dodecanoyl-CoA (n-C12:0CoA)	C01832
din[p]	647	293	0.8061	1.3891	0.244	din	Deoxyinosine	C05512
2agpe181[c]	96	293	0.8061	1.3891	0.244	2agpe181	2-Acyl-sn-glycero-3-phosphoethanolamine (n-C18:1)	C05973
dgsn[p]	625	293	0.8061	1.3891	0.244	dgsn	Deoxyguanosine	C00330
glyald[c]	891	293	0.8061	1.3891	0.244	glyald	D-Glyceraldehyde	C00577
glyc3p[e]	900	293	0.8061	1.3891	0.244	glyc3p	Glycerol 3-phosphate	C00093
h2o2[c]	943	293	0.8061	1.3891	0.244	h2o2	Hydrogen peroxide	C00027
hcys-L[c]	958	293	0.8061	1.3891	0.244	hcys-L	L-Homocysteine	C00155
hdca[c]	959	293	0.8061	1.3891	0.244	hdca	Hexadecanoate (n-C16:0)	C00249
clpn180[p]	524	293	0.8061	1.3891	0.244	clpn180	cardiolipin (tetraoctadecanoyl, n-C18:0)	C05980
ca2[p]	478	293	0.8061	1.3891	0.244	ca2	Calcium	C00076
glyald[p]	893	293	0.8061	1.3891	0.244	glyald	D-Glyceraldehyde	C00577
3hocoa[c]	197	293	0.8061	1.3891	0.244	3hocoa	(S)-3-Hydroxyoctanoyl-CoA	C05266
15dap[c]	26	382	0.8067	1.4565	0.3336	15dap	1,5-Diaminopentane	C01672
15dap[e]	27	382	0.8067	1.4565	0.3336	15dap	1,5-Diaminopentane	C01672
15dap[p]	28	382	0.8067	1.4565	0.3336	15dap	1,5-Diaminopentane	C01672
cyst-L[c]	582	382	0.8067	1.4565	0.3336	cyst-L	L-Cystathionine	C02291
26dap-M[c]	81	389	0.8072	1.4592	0.3403	26dap-M	meso-2,6-Diaminoheptanedioate	C00680
23dhdp[c]	73	389	0.8072	1.4592	0.3403	23dhdp	2,3-Dihydrodipicolinate	C03340
4abut[e]	235	389	0.8072	1.4592	0.3403	4abut	4-Aminobutanoate	C00334
4abut[p]	236	389	0.8072	1.4592	0.3403	4abut	4-Aminobutanoate	C00334
aacoa[c]	291	392	0.8096	1.4586	0.3428	aacoa	Acetoacetyl-CoA	C00332
acanth[c]	303	393	0.8105	1.4728	0.347	acanth	N-Acetylanthranilate	C06332
2tpr3dpcoa[c]	163	395	0.8171	1.4723	0.3487	2tpr3dpcoa	2'-(5''-triphosphoribosyl)-3'-dephospho-CoA	0
for[e]	766	399	0.819	1.4705	0.3517	for	Formate	C00058
for[c]	765	399	0.819	1.4705	0.3517	for	Formate	C00058
for[p]	767	399	0.819	1.4705	0.3517	for	Formate	C00058
3mop[c]	208	399	0.819	1.4705	0.3517	3mop	(S)-3-Methyl-2-oxopentanoate	C00671
dpcoa[c]	662	406.5	0.8211	1.4727	0.3589	dpcoa	Dephospho-CoA	C00882
accoa[c]	304	406.5	0.8211	1.4727	0.3589	accoa	Acetyl-CoA	C00024
coa[c]	532	406.5	0.8211	1.4727	0.3589	coa	Coenzyme A	C00010
hemeO[c]	968	411	0.8223	1.4781	0.3642	hemeO	Heme O	0
5drib[c]	266	412	0.8229	1.4811	0.3658	5drib	5'-deoxyribose	0
adocbl[c]	351	414.5	0.8243	1.4848	0.369	adocbl	Adenosylcobalamin	C00194
amet[c]	397	414.5	0.8243	1.4848	0.369	amet	S-Adenosyl-L-methionine	C00019
ametam[c]	398	414.5	0.8243	1.4848	0.369	ametam	S-Adenosylmethioninamine	C01137
3c2hmp[c]	169	423	0.8307	1.4797	0.3752	3c2hmp	3-Carboxy-2-hydroxy-4-methylpentanoate	C04411
2ippm[c]	137	423	0.8307	1.4797	0.3752	2ippm	2-Isopropylmaleate	C02631
3c4mop[c]	171	423	0.8307	1.4797	0.3752	3c4mop	3-Carboxy-4-methyl-2-oxopentanoate	C04236
4mop[c]	250	423	0.8307	1.4797	0.3752	4mop	4-Methyl-2-oxopentanoate	C00233
2ahbut[c]	112	427.5	0.8308	1.4864	0.3809	2ahbut	(S)-2-Aceto-2-hydroxybutanoate	C06006
23dhmp[c]	75	427.5	0.8308	1.4864	0.3809	23dhmp	(R)-2,3-Dihydroxy-3-methylpentanoate	C06007
g3pe[c]	794	429	0.8344	1.4865	0.3823	g3pe	sn-Glycero-3-phosphoethanolamine	C01233
2ombzl[c]	150	432	0.8375	1.487	0.3851	2ombzl	2-Octaprenyl-6-methoxy-1,4-benzoquinol	0
2omph[c]	153	432	0.8375	1.487	0.3851	2omph	2-Octaprenyl-6-methoxyphenol	C05812
26dap-LL[c]	80	435	0.8378	1.4875	0.3879	26dap-LL	LL-2,6-Diaminoheptanedioate	C00666
4hbz[c]	245	437.5	0.8384	1.4882	0.3903	4hbz	4-Hydroxybenzoate	C00156
anth[c]	413	437.5	0.8384	1.4882	0.3903	anth	Anthranilate	C00108
ahcys[c]	365	446	0.8407	1.489	0.3981	ahcys	S-Adenosyl-L-homocysteine	C00021
dscl[c]	671	447.5	0.8423	1.4881	0.3992	dscl	dihydrosirohydrochlorin	C02463
1pyr5c[c]	53	450	0.8429	1.4917	0.4024	1pyr5c	1-Pyrroline-5-carboxylate	C03912
glu5sa[c]	880	450	0.8429	1.4917	0.4024	glu5sa	L-Glutamate 5-semialdehyde	C01165
4abut[c]	234	450	0.8429	1.4917	0.4024	4abut	4-Aminobutanoate	C00334
hdcea[p]	964	472	0.848	1.5053	0.426	hdcea	Hexadecenoate (n-C16:1)	0
acolipa[e]	332	472	0.848	1.5053	0.426	acolipa	4-Amino-4-deoxy-L-arabinose modified core oligosaccharide lipid A	0
hhlipa[c]	973	472	0.848	1.5053	0.426	hhlipa	heptosyl-heptosyl-kdo2-lipidA	0
acolipa[p]	333	472	0.848	1.5053	0.426	acolipa	4-Amino-4-deoxy-L-arabinose modified core oligosaccharide lipid A	0
hphhlipa[c]	989	472	0.848	1.5053	0.426	hphhlipa	heptosyl-phospho-heptosyl-heptosyl-kdo2-lipidA	0
ddca[p]	617	472	0.848	1.5053	0.426	ddca	Dodecanoate (n-C12:0)	C02679
hlipa[c]	982	472	0.848	1.5053	0.426	hlipa	heptosyl-kdo2-lipidA	0
hdca[p]	961	472	0.848	1.5053	0.426	hdca	Hexadecanoate (n-C16:0)	C00249
asn-L[p]	447	501	0.8481	1.5173	0.4557	asn-L	L-Asparagine	C00152
glyc3p[c]	899	501	0.8481	1.5173	0.4557	glyc3p	Glycerol 3-phosphate	C00093
bglycogen[c]	463	501	0.8481	1.5173	0.4557	bglycogen	branching glycogen	0
asn-L[e]	446	501	0.8481	1.5173	0.4557	asn-L	L-Asparagine	C00152
4hthr[c]	248	501	0.8481	1.5173	0.4557	4hthr	4-Hydroxy-L-threonine	C06056
glcn[e]	864	501	0.8481	1.5173	0.4557	glcn	D-Gluconate	C00257
ala-B[c]	372	501	0.8481	1.5173	0.4557	ala-B	beta-Alanine	C00099
cbasp[c]	480	501	0.8481	1.5173	0.4557	cbasp	N-Carbamoyl-L-aspartate	C00438
glcn[p]	865	501	0.8481	1.5173	0.4557	glcn	D-Gluconate	C00257
asp-L[e]	454	501	0.8481	1.5173	0.4557	asp-L	L-Aspartate	C00049
asp-L[p]	455	501	0.8481	1.5173	0.4557	asp-L	L-Aspartate	C00049
asp-L[c]	453	501	0.8481	1.5173	0.4557	asp-L	L-Aspartate	C00049
3mob[c]	207	516.5	0.8548	1.5322	0.4744	3mob	3-Methyl-2-oxobutanoate	C00141
3c3hmp[c]	170	516.5	0.8548	1.5322	0.4744	3c3hmp	3-Carboxy-3-hydroxy-4-methylpentanoate	C02504
4ppan[c]	254	518.5	0.8561	1.5304	0.4757	4ppan	D-4'-Phosphopantothenate	C03492
2dhp[c]	127	521	0.8573	1.5287	0.4775	2dhp	2-Dehydropantoate	C00966
frulysp[c]	777	523	0.8593	1.5277	0.479	frulysp	fructoselysine Phosphate	0
cpppg3[c]	549	524.5	0.8593	1.5268	0.4801	cpppg3	Coproporphyrinogen III	C03263
2obut[c]	144	526	0.8609	1.5373	0.4848	2obut	2-Oxobutanoate	C00109
etha[c]	706	527	0.8637	1.5367	0.4855	etha	Ethanolamine	C00189
2dmmq8[c]	128	528.5	0.8645	1.5355	0.4865	2dmmq8	2-Demethylmenaquinone 8	C05818
2dmmql8[c]	129	528.5	0.8645	1.5355	0.4865	2dmmql8	2-Demethylmenaquinol 8	0
23dhmb[c]	74	530.5	0.8674	1.5381	0.4892	23dhmb	(R)-2,3-Dihydroxy-3-methylbutanoate	C04272
alac-S[c]	384	530.5	0.8674	1.5381	0.4892	alac-S	(S)-2-Acetolactate	C06010
dhna[c]	634	532	0.8683	1.5385	0.4907	dhna	1,4-Dihydroxy-2-naphthoate	C03657
h2o[c]	946	535.5	0.8687	1.5372	0.4935	h2o	H2O	C00001
h2o[e]	947	535.5	0.8687	1.5372	0.4935	h2o	H2O	C00001
h2o[p]	948	535.5	0.8687	1.5372	0.4935	h2o	H2O	C00001
aps[c]	424	535.5	0.8687	1.5372	0.4935	aps	Adenosine 5'-phosphosulfate	C00224
citr-L[c]	514	539.5	0.8694	1.544	0.4994	citr-L	L-Citrulline	C00327
3ophb[c]	226	547.5	0.8701	1.543	0.5065	3ophb	3-Octaprenyl-4-hydroxybenzoate	C05809
eca2und[p]	695	547.5	0.8701	1.543	0.5065	eca2und	(enterobacterial common antigen)x2 undecaprenyl-diphosphate	0
2ohph[c]	149	547.5	0.8701	1.543	0.5065	2ohph	2-Octaprenyl-6-hydroxyphenol	C05811
2omhmbl[c]	151	547.5	0.8701	1.543	0.5065	2omhmbl	2-Octaprenyl-3-methyl-5-hydroxy-6-methoxy-1,4-benzoquinol	0
2ommbl[c]	152	547.5	0.8701	1.543	0.5065	2ommbl	2-Octaprenyl-3-methyl-6-methoxy- 1,4-benzoquinol	0
2oph[c]	154	547.5	0.8701	1.543	0.5065	2oph	2-Octaprenylphenol	C05810
23ddhb[c]	69	564	0.8721	1.5359	0.5193	23ddhb	2,3-Dihydro-2,3-dihydroxybenzoate	C04171
23dhb[c]	70	564	0.8721	1.5359	0.5193	23dhb	2,3-Dihydroxybenzoate	C00196
23dhbzs[c]	72	564	0.8721	1.5359	0.5193	23dhbzs	2,3-dihydroxybenzoylserine	0
feenter[c]	750	564	0.8721	1.5359	0.5193	feenter	Fe-enterobactin	C06230
4adcho[c]	239	564	0.8721	1.5359	0.5193	4adcho	4-amino-4-deoxychorismate	C11355
4abz[c]	238	564	0.8721	1.5359	0.5193	4abz	4-Aminobenzoate	C00568
chor[c]	509	564	0.8721	1.5359	0.5193	chor	chorismate	C00251
alltn[e]	391	579.5	0.8745	1.5311	0.5319	alltn	Allantoin	C01551
gua[p]	938	579.5	0.8745	1.5311	0.5319	gua	Guanine	C00242
h[e]	953	579.5	0.8745	1.5311	0.5319	h	H+	C00080
alltn[c]	390	579.5	0.8745	1.5311	0.5319	alltn	Allantoin	C01551
gua[e]	937	579.5	0.8745	1.5311	0.5319	gua	Guanine	C00242
csn[c]	557	579.5	0.8745	1.5311	0.5319	csn	Cytosine	C00380
alltn[p]	392	579.5	0.8745	1.5311	0.5319	alltn	Allantoin	C01551
gua[c]	936	579.5	0.8745	1.5311	0.5319	gua	Guanine	C00242
h[p]	954	579.5	0.8745	1.5311	0.5319	h	H+	C00080
acorn[c]	337	589	0.8748	1.5273	0.5393	acorn	N2-Acetyl-L-ornithine	C00437
2shchc[c]	158	591	0.8761	1.5309	0.5424	2shchc	2-Succinyl-6-hydroxy-2,4-cyclohexadiene-1-carboxylate	C05817
enter[c]	703	594	0.877	1.5292	0.5446	enter	Enterochelin	0
enter[e]	704	594	0.877	1.5292	0.5446	enter	Enterochelin	0
enter[p]	705	594	0.877	1.5292	0.5446	enter	Enterochelin	0
feenter[e]	751	594	0.877	1.5292	0.5446	feenter	Fe-enterobactin	C06230
ade[e]	344	597.5	0.8773	1.5283	0.5475	ade	Adenine	C00147
ade[p]	345	597.5	0.8773	1.5283	0.5475	ade	Adenine	C00147
ac[c]	294	611	0.8802	1.5272	0.5594	ac	Acetate	C00033
ac[e]	295	611	0.8802	1.5272	0.5594	ac	Acetate	C00033
23dhba[c]	71	611	0.8802	1.5272	0.5594	23dhba	(2,3-Dihydroxybenzoyl)adenylate	C04030
acald[p]	302	611	0.8802	1.5272	0.5594	acald	Acetaldehyde	C00084
ade[c]	343	611	0.8802	1.5272	0.5594	ade	Adenine	C00147
hxan[c]	996	611	0.8802	1.5272	0.5594	hxan	Hypoxanthine	C00262
hxan[e]	997	611	0.8802	1.5272	0.5594	hxan	Hypoxanthine	C00262
hxan[p]	998	611	0.8802	1.5272	0.5594	hxan	Hypoxanthine	C00262
glu-L[p]	884	611	0.8802	1.5272	0.5594	glu-L	L-Glutamate	C00025
glu-L[e]	883	611	0.8802	1.5272	0.5594	glu-L	L-Glutamate	C00025
glyclt[e]	909	611	0.8802	1.5272	0.5594	glyclt	Glycolate	C00160
glyclt[p]	910	611	0.8802	1.5272	0.5594	glyclt	Glycolate	C00160
acg5sa[c]	307	611	0.8802	1.5272	0.5594	acg5sa	N-Acetyl-L-glutamate 5-semialdehyde	C01250
ac[p]	296	611	0.8802	1.5272	0.5594	ac	Acetate	C00033
gg4abut[c]	854	611	0.8802	1.5272	0.5594	gg4abut	gamma-glutamyl-gamma aminobutyric acid	0
acald[e]	301	611	0.8802	1.5272	0.5594	acald	Acetaldehyde	C00084
4abutn[c]	237	611	0.8802	1.5272	0.5594	4abutn	4-Aminobutanal	C00555
ggptrc[c]	858	611	0.8802	1.5272	0.5594	ggptrc	gamma-glutamyl-putrescine	0
acald[c]	300	611	0.8802	1.5272	0.5594	acald	Acetaldehyde	C00084
ggbutal[c]	856	625.5	0.8806	1.5283	0.5731	ggbutal	gamma-glutamyl-gamma-butyraldehyde	0
h[c]	952	628.5	0.8808	1.5272	0.5755	h	H+	C00080
argsuc[c]	440	628.5	0.8808	1.5272	0.5755	argsuc	N(omega)-(L-Arginino)succinate	C03406
dmpp[c]	652	633.5	0.881	1.5249	0.5791	dmpp	Dimethylallyl diphosphate	C00235
frdp[c]	770	633.5	0.881	1.5249	0.5791	frdp	Farnesyl diphosphate	C00448
2mecdp[c]	143	633.5	0.881	1.5249	0.5791	2mecdp	2-C-methyl-D-erythritol 2,4-cyclodiphosphate	C11453
h2mb4p[c]	942	633.5	0.881	1.5249	0.5791	h2mb4p	1-hydroxy-2-methyl-2-(E)-butenyl 4-diphosphate	C11811
grdp[c]	920	633.5	0.881	1.5249	0.5791	grdp	Geranyl diphosphate	C00341
feenter[p]	752	642	0.882	1.5259	0.5873	feenter	Fe-enterobactin	C06230
3dhsk[c]	177	642	0.882	1.5259	0.5873	3dhsk	3-Dehydroshikimate	C02637
3dhq[c]	176	642	0.882	1.5259	0.5873	3dhq	3-Dehydroquinate	C00944
3psme[c]	230	642	0.882	1.5259	0.5873	3psme	5-O-(1-Carboxyvinyl)-3-phosphoshikimate	C01269
3ig3p[c]	206	642	0.882	1.5259	0.5873	3ig3p	C'-(3-Indolyl)-glycerol 3-phosphate	C03506
2cpr5p[c]	115	642	0.882	1.5259	0.5873	2cpr5p	1-(2-Carboxyphenylamino)-1-deoxy-D-ribulose 5-phosphate	C01302
fe2[p]	729	650.5	0.8832	1.5265	0.5953	fe2	Fe2+	C00023
fe2[e]	728	650.5	0.8832	1.5265	0.5953	fe2	Fe2+	C00023
6hmhpt[c]	273	650.5	0.8832	1.5265	0.5953	6hmhpt	6-hydroxymethyl dihydropterin	0
alltt[c]	393	650.5	0.8832	1.5265	0.5953	alltt	Allantoate	C00499
hmbil[c]	983	666	0.8861	1.521	0.6073	hmbil	Hydroxymethylbilane	C01024
gln-L[c]	874	666	0.8861	1.521	0.6073	gln-L	L-Glutamine	C00064
acser[c]	338	666	0.8861	1.521	0.6073	acser	O-Acetyl-L-serine	C00979
acser[e]	339	666	0.8861	1.521	0.6073	acser	O-Acetyl-L-serine	C00979
acser[p]	340	666	0.8861	1.521	0.6073	acser	O-Acetyl-L-serine	C00979
actp[c]	342	666	0.8861	1.521	0.6073	actp	Acetyl phosphate	C00227
air[c]	368	666	0.8861	1.521	0.6073	air	5-amino-1-(5-phospho-D-ribosyl)imidazole	C03373
glu-L[c]	882	666	0.8861	1.521	0.6073	glu-L	L-Glutamate	C00025
glu-D[c]	881	666	0.8861	1.521	0.6073	glu-D	D-Glutamate	C00217
glyclt[c]	908	666	0.8861	1.521	0.6073	glyclt	Glycolate	C00160
aconm[c]	336	666	0.8861	1.521	0.6073	aconm	E-3-carboxy-2-pentenedioate 6-methyl ester	0
glu5p[c]	879	666	0.8861	1.521	0.6073	glu5p	L-Glutamate 5-phosphate	C03287
adn[e]	347	685	0.8863	1.5213	0.6247	adn	Adenosine	C00212
adn[p]	348	685	0.8863	1.5213	0.6247	adn	Adenosine	C00212
dnad[c]	659	685	0.8863	1.5213	0.6247	dnad	Deamino-NAD+	C00857
2amsa[c]	113	685	0.8863	1.5213	0.6247	2amsa	2-Aminomalonate semialdehyde	C11822
3php[c]	229	685	0.8863	1.5213	0.6247	3php	3-Phosphohydroxypyruvate	C03232
dgsn[c]	623	685	0.8863	1.5213	0.6247	dgsn	Deoxyguanosine	C00330
adn[c]	346	685	0.8863	1.5213	0.6247	adn	Adenosine	C00212
adpglc[c]	355	685	0.8863	1.5213	0.6247	adpglc	ADPglucose	C00498
camp[c]	479	685	0.8863	1.5213	0.6247	camp	cAMP	C00575
10fthf[c]	1	694.5	0.8872	1.52	0.6329	10fthf	10-Formyltetrahydrofolate	C00234
cobalt2[c]	533	697	0.8896	1.5187	0.6346	cobalt2	Co2+	C00175
hom-L[e]	987	698.5	0.8903	1.5172	0.6354	hom-L	L-Homoserine	C00263
hom-L[p]	988	698.5	0.8903	1.5172	0.6354	hom-L	L-Homoserine	C00263
aicar[c]	367	736.5	0.892	1.5091	0.6663	aicar	5-Amino-1-(5-Phospho-D-ribosyl)imidazole-4-carboxamide	C04677
acglu[c]	320	736.5	0.892	1.5091	0.6663	acglu	N-Acetyl-L-glutamate	C00624
etha[e]	707	736.5	0.892	1.5091	0.6663	etha	Ethanolamine	C00189
adprib[c]	358	736.5	0.892	1.5091	0.6663	adprib	ADPribose	C00301
5caiz[c]	261	736.5	0.892	1.5091	0.6663	5caiz	5-phosphoribosyl-5-carboxyaminoimidazole	0
adphep-LD[c]	357	736.5	0.892	1.5091	0.6663	adphep-LD	ADP-L-glycero-D-manno-heptose	C06398
cbp[c]	487	736.5	0.892	1.5091	0.6663	cbp	Carbamoyl phosphate	C00169
fe2[c]	727	736.5	0.892	1.5091	0.6663	fe2	Fe2+	C00023
acglc-D[c]	319	736.5	0.892	1.5091	0.6663	acglc-D	6-Acetyl-D-glucose	C02655
colipa[c]	536	736.5	0.892	1.5091	0.6663	colipa	core oligosaccharide lipid A	0
glx[c]	887	736.5	0.892	1.5091	0.6663	glx	Glyoxylate	C00048
gtp[c]	932	736.5	0.892	1.5091	0.6663	gtp	GTP	C00044
2p4c2me[c]	155	736.5	0.892	1.5091	0.6663	2p4c2me	2-phospho-4-(cytidine 5'-diphospho)-2-C-methyl-D-erythritol	0
dhpt[c]	639	736.5	0.892	1.5091	0.6663	dhpt	Dihydropteroate	C00921
gagicolipa[c]	809	736.5	0.892	1.5091	0.6663	gagicolipa	galactosyl-glucosyl-inner core oligosaccharide lipid A	0
dad-5[c]	590	736.5	0.892	1.5091	0.6663	dad-5	5'-Deoxyadenosine	C05198
fe3[c]	730	736.5	0.892	1.5091	0.6663	fe3	Fe3+	0
fpram[c]	768	736.5	0.892	1.5091	0.6663	fpram	2-(Formamido)-N1-(5-phospho-D-ribosyl)acetamidine	C04640
acg5p[c]	306	736.5	0.892	1.5091	0.6663	acg5p	N-Acetyl-L-glutamyl 5-phosphate	C04133
acon-T[c]	335	736.5	0.892	1.5091	0.6663	acon-T	trans-Aconitate	C02341
gicolipa[c]	859	736.5	0.892	1.5091	0.6663	gicolipa	glucosyl-inner core oligosaccharide lipid A	0
dhf[c]	632	736.5	0.892	1.5091	0.6663	dhf	7,8-Dihydrofolate	C00415
ggagicolipa[c]	855	736.5	0.892	1.5091	0.6663	ggagicolipa	glucosyl-galactosyl-glucosyl-inner core oligosaccharide lipid A	0
glu1sa[c]	878	736.5	0.892	1.5091	0.6663	glu1sa	L-Glutamate 1-semialdehyde	C03741
2me4p[c]	142	736.5	0.892	1.5091	0.6663	2me4p	2-C-methyl-D-erythritol 4-phosphate	C11434
gsn[c]	923	736.5	0.892	1.5091	0.6663	gsn	Guanosine	C00387
gdptp[c]	852	736.5	0.892	1.5091	0.6663	gdptp	Guanosine 3'-diphosphate 5'-triphosphate	C04494
gggagicolipa[c]	857	736.5	0.892	1.5091	0.6663	gggagicolipa	glucosyl-glucosyl-galactosyl-glucosyl-inner core oligosaccharide lipid A	0
hom-L[c]	986	736.5	0.892	1.5091	0.6663	hom-L	L-Homoserine	C00263
4c2me[c]	242	736.5	0.892	1.5091	0.6663	4c2me	4-(cytidine 5'-diphospho)-2-C-methyl-D-erythritol	C11435
2dr1p[c]	130	736.5	0.892	1.5091	0.6663	2dr1p	2-Deoxy-D-ribose 1-phosphate	C00672
5aizc[c]	257	736.5	0.892	1.5091	0.6663	5aizc	5-amino-1-(5-phospho-D-ribosyl)imidazole-4-carboxylate	C04751
5aop[c]	258	736.5	0.892	1.5091	0.6663	5aop	5-Amino-4-oxopentanoate	C00430
acon-C[c]	334	736.5	0.892	1.5091	0.6663	acon-C	cis-Aconitate	C00417
cit[c]	511	736.5	0.892	1.5091	0.6663	cit	Citrate	C00158
akg[c]	369	736.5	0.892	1.5091	0.6663	akg	2-Oxoglutarate	C00026
akg[e]	370	736.5	0.892	1.5091	0.6663	akg	2-Oxoglutarate	C00026
akg[p]	371	736.5	0.892	1.5091	0.6663	akg	2-Oxoglutarate	C00026
din[c]	645	736.5	0.892	1.5091	0.6663	din	Deoxyinosine	C05512
glcn[c]	863	736.5	0.892	1.5091	0.6663	glcn	D-Gluconate	C00257
hco3[c]	957	736.5	0.892	1.5091	0.6663	hco3	Bicarbonate	C00288
2dr5p[c]	131	736.5	0.892	1.5091	0.6663	2dr5p	2-Deoxy-D-ribose 5-phosphate	C00673
dhnpt[c]	635	736.5	0.892	1.5091	0.6663	dhnpt	Dihydroneopterin	C04874
etha[p]	708	736.5	0.892	1.5091	0.6663	etha	Ethanolamine	C00189
2dda7p[c]	116	736.5	0.892	1.5091	0.6663	2dda7p	2-Dehydro-3-deoxy-D-arabino-heptonate 7-phosphate	C04691
6hmhptpp[c]	274	736.5	0.892	1.5091	0.6663	6hmhptpp	6-hydroxymethyl-dihydropterin pyrophosphate	0
aspsa[c]	456	736.5	0.892	1.5091	0.6663	aspsa	L-Aspartate 4-semialdehyde	C00441
ahdt[c]	366	817.5	0.8922	1.4892	0.7299	ahdt	2-Amino-4-hydroxy-6-(erythro-1,2,3-trihydroxypropyl)dihydropteridine triphosphate	C04895
ctp[c]	563	817.5	0.8922	1.4892	0.7299	ctp	CTP	C00063
e4p[c]	694	817.5	0.8922	1.4892	0.7299	e4p	D-Erythrose 4-phosphate	C00279
eca3und[p]	696	817.5	0.8922	1.4892	0.7299	eca3und	(enterobacterial common antigen)x3 undecaprenyl-diphosphate	0
2dh3dgal6p[c]	123	817.5	0.8922	1.4892	0.7299	2dh3dgal6p	2-Dehydro-3-deoxy-D-galactonate 6-phosphate	C01286
eca4und[p]	699	817.5	0.8922	1.4892	0.7299	eca4und	(enterobacterial common antigen)x4 undecaprenyl-diphosphate	0
hmfurn[c]	984	817.5	0.8922	1.4892	0.7299	hmfurn	4-hydroxy-5-methyl-3(2H)-furanone	0
25aics[c]	77	817.5	0.8922	1.4892	0.7299	25aics	(S)-2-[5-Amino-1-(5-phospho-D-ribosyl)imidazole-4-carboxamido]succinate	C04823
25drapp[c]	79	817.5	0.8922	1.4892	0.7299	25drapp	2,5-Diamino-6-(ribosylamino)-4-(3H)-pyrimidinone 5'-phosphate	0
acgam1p[c]	312	817.5	0.8922	1.4892	0.7299	acgam1p	N-Acetyl-D-glucosamine 1-phosphate	C04256
adphep-DD[c]	356	817.5	0.8922	1.4892	0.7299	adphep-DD	ADP-D-glycero-D-manno-heptose	C06397
cmp[c]	526	817.5	0.8922	1.4892	0.7299	cmp	CMP	C00055
dhpmp[c]	637	817.5	0.8922	1.4892	0.7299	dhpmp	Dihydroneopterin monophosphate	C05925
gdp[c]	845	817.5	0.8922	1.4892	0.7299	gdp	GDP	C00035
glyc-R[p]	904	817.5	0.8922	1.4892	0.7299	glyc-R	(R)-Glycerate	C00258
dctp[c]	609	817.5	0.8922	1.4892	0.7299	dctp	dCTP	C00458
2mahmp[c]	139	817.5	0.8922	1.4892	0.7299	2mahmp	2-Methyl-4-amino-5-hydroxymethylpyrimidine diphosphate	C04752
dhptd[c]	640	817.5	0.8922	1.4892	0.7299	dhptd	4,5-dihydroxy-2,3-pentanedione	C11838
dhmptp[c]	633	817.5	0.8922	1.4892	0.7299	dhmptp	dihydromonapterin-triphosphate	0
4per[c]	253	817.5	0.8922	1.4892	0.7299	4per	4-Phospho-D-erythronate	C03393
cytd[c]	584	817.5	0.8922	1.4892	0.7299	cytd	Cytidine	C00475
gmhep17bp[c]	913	817.5	0.8922	1.4892	0.7299	gmhep17bp	D-Glycero-D-manno-heptose 1,7-bisphosphate	C11472
fgam[c]	759	817.5	0.8922	1.4892	0.7299	fgam	N2-Formyl-N1-(5-phospho-D-ribosyl)glycinamide	C04376
gdpddman[c]	848	817.5	0.8922	1.4892	0.7299	gdpddman	GDP-4-dehydro-6-deoxy-D-mannose	C01222
gdpfuc[c]	849	817.5	0.8922	1.4892	0.7299	gdpfuc	GDP-L-fucose	C00325
gdpmann[c]	850	817.5	0.8922	1.4892	0.7299	gdpmann	GDP-D-mannose	C00096
gmhep1p[c]	914	817.5	0.8922	1.4892	0.7299	gmhep1p	D-Glycero-D-manno-heptose 1-phosphate	C07838
gmhep7p[c]	915	817.5	0.8922	1.4892	0.7299	gmhep7p	D-Glycero-D-manno-heptose 7-phosphate	C07836
gmp[c]	916	817.5	0.8922	1.4892	0.7299	gmp	GMP	C00144
2h3oppan[c]	132	817.5	0.8922	1.4892	0.7299	2h3oppan	2-Hydroxy-3-oxopropanoate	C01146
colipa[p]	538	817.5	0.8922	1.4892	0.7299	colipa	core oligosaccharide lipid A	0
dgdp[c]	619	817.5	0.8922	1.4892	0.7299	dgdp	dGDP	C00361
atp[c]	459	817.5	0.8922	1.4892	0.7299	atp	ATP	C00002
colipa[e]	537	817.5	0.8922	1.4892	0.7299	colipa	core oligosaccharide lipid A	0
cytd[e]	585	817.5	0.8922	1.4892	0.7299	cytd	Cytidine	C00475
glyc-R[c]	902	817.5	0.8922	1.4892	0.7299	glyc-R	(R)-Glycerate	C00258
4ampm[c]	241	817.5	0.8922	1.4892	0.7299	4ampm	4-Amino-2-methyl-5-phosphomethylpyrimidine	C04556
dha[c]	627	817.5	0.8922	1.4892	0.7299	dha	Dihydroxyacetone	C00184
fprica[c]	769	817.5	0.8922	1.4892	0.7299	fprica	5-Formamido-1-(5-phospho-D-ribosyl)imidazole-4-carboxamide	C04734
fru[c]	771	817.5	0.8922	1.4892	0.7299	fru	D-Fructose	C00095
gdpofuc[c]	851	817.5	0.8922	1.4892	0.7299	gdpofuc	GDP-4-oxo-L-fucose	0
cytd[p]	586	817.5	0.8922	1.4892	0.7299	cytd	Cytidine	C00475
dha[p]	629	817.5	0.8922	1.4892	0.7299	dha	Dihydroxyacetone	C00184
glc-D[p]	862	817.5	0.8922	1.4892	0.7299	glc-D	D-Glucose	C00031
hpyr[c]	990	817.5	0.8922	1.4892	0.7299	hpyr	Hydroxypyruvate	C00168
cdp[c]	493	817.5	0.8922	1.4892	0.7299	cdp	CDP	C00112
dgtp[c]	626	817.5	0.8922	1.4892	0.7299	dgtp	dGTP	C00286
dha[e]	628	817.5	0.8922	1.4892	0.7299	dha	Dihydroxyacetone	C00184
dxyl5p[c]	692	817.5	0.8922	1.4892	0.7299	dxyl5p	1-deoxy-D-xylulose 5-phosphate	C11437
glyc-R[e]	903	817.5	0.8922	1.4892	0.7299	glyc-R	(R)-Glycerate	C00258
didp[c]	641	893	0.8924	1.4565	0.7798	didp	dIDP	C01344
N1aspmd[c]	287	893	0.8924	1.4565	0.7798	N1aspmd	N1-Acetylspermidine	C00612
enlipa[e]	701	893	0.8924	1.4565	0.7798	enlipa	phosphoethanolamine KDO(2)-lipid (A)	0
enlipa[p]	702	893	0.8924	1.4565	0.7798	enlipa	phosphoethanolamine KDO(2)-lipid (A)	0
aact[c]	292	893	0.8924	1.4565	0.7798	aact	Aminoacetone	C01888
fum[e]	785	893	0.8924	1.4565	0.7798	fum	Fumarate	C00122
2pg[c]	156	893	0.8924	1.4565	0.7798	2pg	D-Glycerate 2-phosphate	C00631
dcdp[c]	605	893	0.8924	1.4565	0.7798	dcdp	dCDP	C00705
dcmp[c]	606	893	0.8924	1.4565	0.7798	dcmp	dCMP	C00239
ditp[c]	648	893	0.8924	1.4565	0.7798	ditp	dITP	C01345
dump[c]	685	893	0.8924	1.4565	0.7798	dump	dUMP	C00365
fum[p]	786	893	0.8924	1.4565	0.7798	fum	Fumarate	C00122
dcyt[c]	610	893	0.8924	1.4565	0.7798	dcyt	Deoxycytidine	C00881
dudp[c]	684	893	0.8924	1.4565	0.7798	dudp	dUDP	C01346
duri[c]	688	893	0.8924	1.4565	0.7798	duri	Deoxyuridine	C00526
3pg[c]	228	893	0.8924	1.4565	0.7798	3pg	3-Phospho-D-glycerate	C00197
5apru[c]	260	893	0.8924	1.4565	0.7798	5apru	5-Amino-6-(5'-phosphoribosylamino)uracil	C01268
glc-D[e]	861	893	0.8924	1.4565	0.7798	glc-D	D-Glucose	C00031
dutp[c]	691	893	0.8924	1.4565	0.7798	dutp	dUTP	C00460
glc-D[c]	860	893	0.8924	1.4565	0.7798	glc-D	D-Glucose	C00031
5mthf[c]	270	893	0.8924	1.4565	0.7798	5mthf	5-Methyltetrahydrofolate	C00440
asn-L[c]	445	893	0.8924	1.4565	0.7798	asn-L	L-Asparagine	C00152
datp[c]	596	893	0.8924	1.4565	0.7798	datp	dATP	C00131
db4p[c]	597	893	0.8924	1.4565	0.7798	db4p	3,4-dihydroxy-2-butanone 4-phosphate	0
athr-L[c]	458	893	0.8924	1.4565	0.7798	athr-L	L-Allo-threonine	C05519
4r5au[c]	256	893	0.8924	1.4565	0.7798	4r5au	4-(1-D-Ribitylamino)-5-aminouracil	C04732
ckdo[c]	515	893	0.8924	1.4565	0.7798	ckdo	CMP-3-deoxy-D-manno-octulosonate	0
dad-2[c]	587	893	0.8924	1.4565	0.7798	dad-2	Deoxyadenosine	C00559
glycogen[c]	911	893	0.8924	1.4565	0.7798	glycogen	glycogen	C00182
2aobut[c]	114	893	0.8924	1.4565	0.7798	2aobut	L-2-Amino-3-oxobutanoate	C03508
adp[c]	354	893	0.8924	1.4565	0.7798	adp	ADP	C00008
dgmp[c]	620	893	0.8924	1.4565	0.7798	dgmp	dGMP	C00362
gam1p[c]	833	893	0.8924	1.4565	0.7798	gam1p	D-Glucosamine 1-phosphate	C06156
gam6p[c]	834	893	0.8924	1.4565	0.7798	gam6p	D-Glucosamine 6-phosphate	C00352
12ppd-R[c]	16	893	0.8924	1.4565	0.7798	12ppd-R	(R)-Propane-1,2-diol	C02912
12ppd-R[e]	17	893	0.8924	1.4565	0.7798	12ppd-R	(R)-Propane-1,2-diol	C02912
12ppd-R[p]	18	893	0.8924	1.4565	0.7798	12ppd-R	(R)-Propane-1,2-diol	C02912
dtdp4aaddg[c]	673	893	0.8924	1.4565	0.7798	dtdp4aaddg	dTDP-4-acetamido-4,6-dideoxy-D-galactose	0
ara5p[c]	425	893	0.8924	1.4565	0.7798	ara5p	D-Arabinose 5-phosphate	C01112
amp[c]	400	893	0.8924	1.4565	0.7798	amp	AMP	C00020
agm[e]	363	941	0.8934	1.4333	0.8086	agm	Agmatine	C00179
agm[p]	364	941	0.8934	1.4333	0.8086	agm	Agmatine	C00179
arg-L[e]	438	941	0.8934	1.4333	0.8086	arg-L	L-Arginine	C00062
arg-L[p]	439	941	0.8934	1.4333	0.8086	arg-L	L-Arginine	C00062
dtdp4addg[c]	674	941	0.8934	1.4333	0.8086	dtdp4addg	dTDP-4-amino-4,6-dideoxy-D-galactose	C04268
dtdprmn[c]	679	941	0.8934	1.4333	0.8086	dtdprmn	dTDP-L-rhamnose	C03319
dtmp[c]	680	941	0.8934	1.4333	0.8086	dtmp	dTMP	C00364
dtdp4d6dg[c]	675	941	0.8934	1.4333	0.8086	dtdp4d6dg	dTDP-4-dehydro-6-deoxy-D-glucose	C00687
dtdp[c]	677	941	0.8934	1.4333	0.8086	dtdp	dTDP	C00363
dtdpglu[c]	678	941	0.8934	1.4333	0.8086	dtdpglu	dTDPglucose	C00842
dttp[c]	683	941	0.8934	1.4333	0.8086	dttp	dTTP	C00459
dmlz[c]	651	941	0.8934	1.4333	0.8086	dmlz	6,7-Dimethyl-8-(1-D-ribityl)lumazine	C04332
fmnh2[c]	764	941	0.8934	1.4333	0.8086	fmnh2	Reduced FMN	0
dtdp4d6dm[c]	676	941	0.8934	1.4333	0.8086	dtdp4d6dm	dTDP-4-dehydro-6-deoxy-L-mannose	C00688
5aprbu[c]	259	941	0.8934	1.4333	0.8086	5aprbu	5-Amino-6-(5'-phosphoribitylamino)uracil	C04454
dcamp[c]	604	941	0.8934	1.4333	0.8086	dcamp	N6-(1,2-Dicarboxyethyl)-AMP	C03794
fmn[c]	763	941	0.8934	1.4333	0.8086	fmn	FMN	C00061
agm[c]	362	941	0.8934	1.4333	0.8086	agm	Agmatine	C00179
arg-L[c]	437	941	0.8934	1.4333	0.8086	arg-L	L-Arginine	C00062
fadh2[c]	720	941	0.8934	1.4333	0.8086	fadh2	Flavin adenine dinucleotide reduced	C01352
4pasp[c]	252	941	0.8934	1.4333	0.8086	4pasp	4-Phospho-L-aspartate	C03082
fad[c]	719	941	0.8934	1.4333	0.8086	fad	Flavin adenine dinucleotide oxidized	C00016
eig3p[c]	700	960.5	0.8944	1.4227	0.8192	eig3p	D-erythro-1-(Imidazol-4-yl)glycerol 3-phosphate	C04666
damp[c]	592	960.5	0.8944	1.4227	0.8192	damp	dAMP	C00360
his-L[c]	974	960.5	0.8944	1.4227	0.8192	his-L	L-Histidine	C00135
dimp[c]	642	960.5	0.8944	1.4227	0.8192	dimp	dIMP	C06196
dadp[c]	591	960.5	0.8944	1.4227	0.8192	dadp	dADP	C00206
histd[c]	978	960.5	0.8944	1.4227	0.8192	histd	L-Histidinol	C00860
gly[c]	888	965	0.8954	1.4198	0.8214	gly	Glycine	C00037
gar[c]	839	966	0.8954	1.4192	0.8219	gar	N1-(5-Phospho-D-ribosyl)glycinamide	C03838
his-L[e]	975	968	0.8964	1.4182	0.823	his-L	L-Histidine	C00135
his-L[p]	976	968	0.8964	1.4182	0.823	his-L	L-Histidine	C00135
hisp[c]	977	968	0.8964	1.4182	0.823	hisp	L-Histidinol phosphate	C01100
13dpg[c]	22	980	0.8977	1.4113	0.8292	13dpg	3-Phospho-D-glyceroyl phosphate	C00236
fdp[c]	726	980	0.8977	1.4113	0.8292	fdp	D-Fructose 1,6-bisphosphate	C00354
fum[c]	784	980	0.8977	1.4113	0.8292	fum	Fumarate	C00122
g3p[c]	790	980	0.8977	1.4113	0.8292	g3p	Glyceraldehyde 3-phosphate	C00661
2mcit[c]	141	980	0.8977	1.4113	0.8292	2mcit	2-Methylcitrate	C02225
dhap[c]	630	980	0.8977	1.4113	0.8292	dhap	Dihydroxyacetone phosphate	C00111
f6p[c]	716	980	0.8977	1.4113	0.8292	f6p	D-Fructose 6-phosphate	C00085
gal[c]	815	980	0.8977	1.4113	0.8292	gal	D-Galactose	C00124
2mcacn[c]	140	980	0.8977	1.4113	0.8292	2mcacn	cis-2-Methylaconitate	C04225
allul6p[c]	394	980	0.8977	1.4113	0.8292	allul6p	Allulose 6-phosphate	0
all6p[c]	386	980	0.8977	1.4113	0.8292	all6p	D-Allose 6-phosphate	C02962
g1p[c]	787	994	0.9031	1.4031	0.8361	g1p	D-Glucose 1-phosphate	C00103
6pgc[c]	275	994	0.9031	1.4031	0.8361	6pgc	6-Phospho-D-gluconate	C00345
6pgl[c]	276	994	0.9031	1.4031	0.8361	6pgl	6-phospho-D-glucono-1,5-lactone	C01236
gal1p[c]	810	994	0.9031	1.4031	0.8361	gal1p	alpha-D-Galactose 1-phosphate	C00446
2ddg6p[c]	119	994	0.9031	1.4031	0.8361	2ddg6p	2-Dehydro-3-deoxy-D-gluconate 6-phosphate	C04442
g6p[c]	806	994	0.9031	1.4031	0.8361	g6p	D-Glucose 6-phosphate	C00092
f6p[e]	717	NA	NA	1.108	0.8383	f6p	D-Fructose 6-phosphate	C00085
adocbi[c]	349	NA	NA	1.2666	0.8383	adocbi	Adenosyl cobinamide	C06508
3hoctACP[c]	198	NA	NA	1.3356	0.8383	3hoctACP	(R)-3-Hydroxyoctanoyl-[acyl-carrier protein]	C04620
3hoctaACP[c]	199	NA	NA	1.3343	0.8383	3hoctaACP	(R)-3-Hydroxyoctadecanoyl-[acyl-carrier protein]	0
ACP[c]	278	NA	NA	1.2959	0.8383	ACP	acyl carrier protein	C00229
cpgn-un[p]	548	NA	NA	1.178	0.8383	cpgn-un	coprogen unloaded (no Fe(III))	0
3hddecACP[c]	191	NA	NA	1.3407	0.8383	3hddecACP	(R)-3-Hydroxydodecanoyl-[acyl-carrier protein]	C05757
crn[c]	553	NA	NA	1.1741	0.8383	crn	L-Carnitine	C00318
crnDcoa[c]	550	NA	NA	1.177	0.8383	crnDcoa	D-carnitinyl-CoA	0
crn-D[c]	551	NA	NA	1.1761	0.8383	crn-D	D-Carnitine	C00487
acnam[p]	331	NA	NA	1.2689	0.8383	acnam	N-Acetylneuraminate	C00270
ctbtcoa[c]	562	NA	NA	1.1662	0.8383	ctbtcoa	crotonobetainyl-CoA	0
3hpalmACP[c]	201	NA	NA	1.333	0.8383	3hpalmACP	R-3-hydroxypalmitoyl-[acyl-carrier protein]	C04633
3hpppn[c]	202	NA	NA	1.3317	0.8383	3hpppn	3-(3-hydroxy-phenyl)propionate	0
3hpppn[e]	203	NA	NA	1.3305	0.8383	3hpppn	3-(3-hydroxy-phenyl)propionate	0
dxyl[c]	693	NA	NA	1.1124	0.8383	dxyl	1-deoxy-D-xylulose	C06257
acnam[e]	330	NA	NA	1.27	0.8383	acnam	N-Acetylneuraminate	C00270
3ooctACP[c]	222	NA	NA	1.3192	0.8383	3ooctACP	3-Oxooctanoyl-[acyl-carrier protein]	C05750
5mdr1p[c]	267	NA	NA	1.3032	0.8383	5mdr1p	5-Methylthio-5-deoxy-D-ribose 1-phosphate	C04188
26dap-M[p]	83	NA	NA	1.3763	0.8383	26dap-M	meso-2,6-Diaminoheptanedioate	C00680
ag[c]	359	NA	NA	1.262	0.8383	ag	silver	C06710
gam[e]	837	NA	NA	1.0427	0.8383	gam	D-Glucosamine	C00329
gam[p]	838	NA	NA	1.042	0.8383	gam	D-Glucosamine	C00329
26dap-M[e]	82	NA	NA	1.3777	0.8383	26dap-M	meso-2,6-Diaminoheptanedioate	C00680
2ddglcn[e]	121	NA	NA	1.3736	0.8383	2ddglcn	2-Dehydro-3-deoxy-D-gluconate	C00204
Sfglutth[c]	289	NA	NA	1.2935	0.8383	Sfglutth	S-Formylglutathione	C01031
aacald[c]	290	NA	NA	1.2924	0.8383	aacald	Aminoacetaldehyde	C06735
acACP[c]	293	NA	NA	1.2912	0.8383	acACP	Acetyl-ACP	0
cynt[e]	574	NA	NA	1.1576	0.8383	cynt	Cyanate	C01417
cynt[p]	575	NA	NA	1.1566	0.8383	cynt	Cyanate	C01417
fe3dcit[e]	733	NA	NA	1.1019	0.8383	fe3dcit	Fe(III)dicitrate	C06229
fe3dcit[p]	734	NA	NA	1.101	0.8383	fe3dcit	Fe(III)dicitrate	C06229
fe3hox[p]	740	NA	NA	1.0959	0.8383	fe3hox	Fe(III)hydroxamate	C06227
gam6p[p]	836	NA	NA	1.0435	0.8383	gam6p	D-Glucosamine 6-phosphate	C00352
gly[p]	890	NA	NA	1.0252	0.8383	gly	Glycine	C00037
hmgth[c]	985	NA	NA	1.0009	0.8383	hmgth	hydroxymethylglutathione	0
23dappa[e]	67	NA	NA	1.3831	0.8383	23dappa	2,3-diaminopropionate	C06393
2ddglcn[c]	120	NA	NA	1.375	0.8383	2ddglcn	2-Dehydro-3-deoxy-D-gluconate	C00204
2ddglcn[p]	122	NA	NA	1.3723	0.8383	2ddglcn	2-Dehydro-3-deoxy-D-gluconate	C00204
2pglyc[c]	157	NA	NA	1.3656	0.8383	2pglyc	2-Phosphoglycolate	C00988
3gmp[e]	178	NA	NA	1.3537	0.8383	3gmp	3'-GMP	C06193
5dh4dglc[c]	265	NA	NA	1.3044	0.8383	5dh4dglc	5-Dehydro-4-deoxy-D-glucarate	C00679
acmana[e]	323	NA	NA	1.2758	0.8383	acmana	N-Acetyl-D-mannosamine	C00645
acmana[p]	324	NA	NA	1.2747	0.8383	acmana	N-Acetyl-D-mannosamine	C00645
acmum[e]	327	NA	NA	1.2735	0.8383	acmum	N-Acetylmuramate	C02713
acmum[p]	328	NA	NA	1.2724	0.8383	acmum	N-Acetylmuramate	C02713
acnam[c]	329	NA	NA	1.2712	0.8383	acnam	N-Acetylneuraminate	C00270
cd2[c]	488	NA	NA	1.2003	0.8383	cd2	Cadmium	C01413
damp[e]	593	NA	NA	1.1518	0.8383	damp	dAMP	C00360
damp[p]	594	NA	NA	1.1509	0.8383	damp	dAMP	C00360
dann[c]	595	NA	NA	1.1499	0.8383	dann	7,8-Diaminononanoate	C01037
dcaACP[c]	599	NA	NA	1.149	0.8383	dcaACP	Decanoyl-ACP (n-C10:0ACP)	C05755
fe3hox-un[p]	743	NA	NA	1.0933	0.8383	fe3hox-un	Fe(III)hydoxamate, unloaded	0
fecrm[e]	745	NA	NA	1.0916	0.8383	fecrm	Ferrichrome	C06228
fecrm-un[c]	747	NA	NA	1.0899	0.8383	fecrm-un	Ferrichrome minus Fe(III)	0
fecrm-un[p]	749	NA	NA	1.0882	0.8383	fecrm-un	Ferrichrome minus Fe(III)	0
feoxam[c]	753	NA	NA	1.0873	0.8383	feoxam	ferroxamine	0
feoxam[p]	755	NA	NA	1.0857	0.8383	feoxam	ferroxamine	0
fruur[e]	779	NA	NA	1.0756	0.8383	fruur	D-Fructuronate	C00905
fuc-L[c]	781	NA	NA	1.074	0.8383	fuc-L	L-Fucose	C01019
fuc-L[p]	783	NA	NA	1.0723	0.8383	fuc-L	L-Fucose	C01019
g1p[p]	789	NA	NA	1.0707	0.8383	g1p	D-Glucose 1-phosphate	C00103
h2[p]	941	NA	NA	1.0111	0.8383	h2	H2	C00282
hdcea[e]	963	NA	NA	1.0067	0.8383	hdcea	Hexadecenoate (n-C16:1)	0
12ppd-S[e]	20	NA	NA	1.3983	0.8383	12ppd-S	(S)-Propane-1,2-diol	C02917
12ppd-S[p]	21	NA	NA	1.3969	0.8383	12ppd-S	(S)-Propane-1,2-diol	C02917
23dappa[c]	66	NA	NA	1.3845	0.8383	23dappa	2,3-diaminopropionate	C06393
23dappa[p]	68	NA	NA	1.3817	0.8383	23dappa	2,3-diaminopropionate	C06393
23doguln[c]	76	NA	NA	1.3804	0.8383	23doguln	2,3-Dioxo-L-gulonate	C05409
25dkglcn[c]	78	NA	NA	1.379	0.8383	25dkglcn	2,5-diketo-D-gluconate	C02780
2kmb[c]	138	NA	NA	1.3669	0.8383	2kmb	2-keto-4-methylthiobutyrate	0
3hcddec5eACP[c]	182	NA	NA	1.3497	0.8383	3hcddec5eACP	(R)-3-hydroxy-cis-dodec-5-enoyl-[acyl-carrier protein]	0
3opalmACP[c]	225	NA	NA	1.3167	0.8383	3opalmACP	3-Oxohexadecanoyl-[acyl-carrier protein]	C05762
acgam1p[p]	314	NA	NA	1.2805	0.8383	acgam1p	N-Acetyl-D-glucosamine 1-phosphate	C04256
actACP[c]	341	NA	NA	1.2677	0.8383	actACP	Acetoacetyl-ACP	C05744
adocbl[e]	352	NA	NA	1.2643	0.8383	adocbl	Adenosylcobalamin	C00194
ala-B[e]	373	NA	NA	1.2586	0.8383	ala-B	beta-Alanine	C00099
ala-B[p]	374	NA	NA	1.2575	0.8383	ala-B	beta-Alanine	C00099
ala-L[p]	380	NA	NA	1.2552	0.8383	ala-L	L-Alanine	C00041
all-D[e]	388	NA	NA	1.2519	0.8383	all-D	D-Allose	C01487
all-D[p]	389	NA	NA	1.2507	0.8383	all-D	D-Allose	C01487
alpp[p]	395	NA	NA	1.2496	0.8383	alpp	applipoprotein	C01834
arbtn[c]	431	NA	NA	1.2353	0.8383	arbtn	aerobactin minus Fe3	0
arbtn[e]	432	NA	NA	1.2342	0.8383	arbtn	aerobactin minus Fe3	0
aso3[e]	450	NA	NA	1.2234	0.8383	aso3	arsenite	C06697
aso3[p]	451	NA	NA	1.2223	0.8383	aso3	arsenite	C06697
aso4[c]	452	NA	NA	1.2212	0.8383	aso4	arsenate	C01478
bbtcoa[c]	461	NA	NA	1.2191	0.8383	bbtcoa	gamma-butyrobetainyl-CoA	0
betald[c]	462	NA	NA	1.2181	0.8383	betald	Betaine aldehyde	C00576
cbl1[e]	485	NA	NA	1.2013	0.8383	cbl1	Cob(I)alamin	C00853
cmp[e]	527	NA	NA	1.186	0.8383	cmp	CMP	C00055
cobalt2[e]	534	NA	NA	1.184	0.8383	cobalt2	Co2+	C00175
cpgn-un[e]	547	NA	NA	1.179	0.8383	cpgn-un	coprogen unloaded (no Fe(III))	0
csn[e]	558	NA	NA	1.1701	0.8383	csn	Cytosine	C00380
cu[p]	569	NA	NA	1.1624	0.8383	cu	Cu+	0
cyan[c]	570	NA	NA	1.1614	0.8383	cyan	Hydrogen cyanide	C01326
cyan[p]	572	NA	NA	1.1595	0.8383	cyan	Hydrogen cyanide	C01326
cystrna[c]	583	NA	NA	1.1528	0.8383	cystrna	L-Cysteinyl-tRNA(Cys)	C03125
dgmp[p]	622	NA	NA	1.1396	0.8383	dgmp	dGMP	C00362
dkmpp[c]	649	NA	NA	1.1332	0.8383	dkmpp	2,3-diketo-5-methylthio-1-phosphopentane	0
dmso[c]	656	NA	NA	1.1286	0.8383	dmso	Dimethyl sulfoxide	C11143
dmso[e]	657	NA	NA	1.1277	0.8383	dmso	Dimethyl sulfoxide	C11143
dmso[p]	658	NA	NA	1.1268	0.8383	dmso	Dimethyl sulfoxide	C11143
dopa[e]	660	NA	NA	1.1259	0.8383	dopa	Dopamine	C03758
dopa[p]	661	NA	NA	1.125	0.8383	dopa	Dopamine	C03758
dsbaox[p]	663	NA	NA	1.1241	0.8383	dsbaox	periplasmic protein disulfide isomerase I (oxidized)	0
dsbard[p]	664	NA	NA	1.1232	0.8383	dsbard	periplasmic protein disulfide isomerase I (reduced)	0
dsbcox[p]	665	NA	NA	1.1223	0.8383	dsbcox	protein disulfide isomerase II (oxidized)	0
dsbcrd[p]	666	NA	NA	1.1214	0.8383	dsbcrd	protein disulfide isomerase II (reduced)	0
dsbdox[c]	667	NA	NA	1.1205	0.8383	dsbdox	fused thiol:disulfide interchange protein (oxidized)	0
dsbdrd[c]	668	NA	NA	1.1196	0.8383	dsbdrd	fused thiol:disulfide interchange protein (reduced)	0
dsbgox[p]	669	NA	NA	1.1187	0.8383	dsbgox	periplasmic disulfide isomerase/thiol-disulphide oxidase (oxidized)	0
dsbgrd[p]	670	NA	NA	1.1178	0.8383	dsbgrd	periplasmic disulfide isomerase/thiol-disulphide oxidase (reduced)	0
dump[e]	686	NA	NA	1.1142	0.8383	dump	dUMP	C00365
ethso3[c]	709	NA	NA	1.1115	0.8383	ethso3	ethanesulfonate	0
ethso3[e]	710	NA	NA	1.1107	0.8383	ethso3	ethanesulfonate	0
f6p[p]	718	NA	NA	1.1071	0.8383	f6p	D-Fructose 6-phosphate	C00085
fald[c]	721	NA	NA	1.1063	0.8383	fald	Formaldehyde	C00067
fald[e]	722	NA	NA	1.1054	0.8383	fald	Formaldehyde	C00067
fald[p]	723	NA	NA	1.1045	0.8383	fald	Formaldehyde	C00067
fcl-L[c]	725	NA	NA	1.1028	0.8383	fcl-L	L-fuculose	C01721
fecrm[c]	744	NA	NA	1.0924	0.8383	fecrm	Ferrichrome	C06228
fecrm[p]	746	NA	NA	1.0907	0.8383	fecrm	Ferrichrome	C06228
fecrm-un[e]	748	NA	NA	1.089	0.8383	fecrm-un	Ferrichrome minus Fe(III)	0
feoxam[e]	754	NA	NA	1.0865	0.8383	feoxam	ferroxamine	0
feoxam-un[c]	756	NA	NA	1.0848	0.8383	feoxam-un	ferroxamine minus Fe(3)	0
feoxam-un[e]	757	NA	NA	1.084	0.8383	feoxam-un	ferroxamine minus Fe(3)	0
fruur[c]	778	NA	NA	1.0765	0.8383	fruur	D-Fructuronate	C00905
fruur[p]	780	NA	NA	1.0748	0.8383	fruur	D-Fructuronate	C00905
fuc-L[e]	782	NA	NA	1.0732	0.8383	fuc-L	L-Fucose	C01019
g1p[e]	788	NA	NA	1.0715	0.8383	g1p	D-Glucose 1-phosphate	C00103
g3pc[c]	791	NA	NA	1.0699	0.8383	g3pc	sn-Glycero-3-phosphocholine	C00670
g3pc[p]	793	NA	NA	1.0682	0.8383	g3pc	sn-Glycero-3-phosphocholine	C00670
g3pi[e]	801	NA	NA	1.0666	0.8383	g3pi	sn-Glycero-3-phospho-1-inositol	C01225
g3ps[c]	803	NA	NA	1.065	0.8383	g3ps	Glycerophosphoserine	0
gal[p]	817	NA	NA	1.0569	0.8383	gal	D-Galactose	C00124
galct-D[c]	818	NA	NA	1.0561	0.8383	galct-D	D-Galactarate	C00879
garagund[c]	840	NA	NA	1.0412	0.8383	garagund	glucosyl-O-acetyl-rhamanosyl-N-acetylglucosamyl-undecaprenyl diphosphate	0
gbbtn[c]	841	NA	NA	1.0404	0.8383	gbbtn	gamma-butyrobetaine	0
gbbtn[e]	842	NA	NA	1.0396	0.8383	gbbtn	gamma-butyrobetaine	0
gbbtn[p]	843	NA	NA	1.0389	0.8383	gbbtn	gamma-butyrobetaine	0
gcald[c]	844	NA	NA	1.0381	0.8383	gcald	Glycolaldehyde	C00266
gdp[e]	846	NA	NA	1.0373	0.8383	gdp	GDP	C00035
grxrd[c]	922	NA	NA	1.017	0.8383	grxrd	glutaredoxin (reduced)	0
gthox[p]	928	NA	NA	1.0147	0.8383	gthox	Oxidized glutathione	C00127
gtp[e]	933	NA	NA	1.014	0.8383	gtp	GTP	C00044
gtp[p]	934	NA	NA	1.0133	0.8383	gtp	GTP	C00044
h2[c]	939	NA	NA	1.0125	0.8383	h2	H2	C00282
h2[e]	940	NA	NA	1.0118	0.8383	h2	H2	C00282
glcr[c]	866	NA	NA	1.035	0.8383	glcr	D-Glucarate	C00818
23camp[p]	59	NA	NA	1.3941	0.8383	23camp	2',3'-Cyclic AMP	C02353
23cump[p]	65	NA	NA	1.3859	0.8383	23cump	2',3'-Cyclic UMP	C02355
3amp[p]	168	NA	NA	1.3602	0.8383	3amp	3'-AMP	C01367
3oddecACP[c]	215	NA	NA	1.3242	0.8383	3oddecACP	3-Oxododecanoyl-[acyl-carrier protein]	C05756
butACP[c]	469	NA	NA	1.2128	0.8383	butACP	Butyryl-ACP (n-C4:0ACP)	C05745
but[c]	470	NA	NA	1.2117	0.8383	but	Butyrate (n-C4:0)	C00246
but[e]	471	NA	NA	1.2107	0.8383	but	Butyrate (n-C4:0)	C00246
dcmp[p]	608	NA	NA	1.1452	0.8383	dcmp	dCMP	C00239
3odecACP[c]	216	NA	NA	1.3229	0.8383	3odecACP	3-Oxodecanoyl-[acyl-carrier protein]	C05753
adocbip[c]	350	NA	NA	1.2655	0.8383	adocbip	Adenosyl cobinamide phosphate	C06509
dms[p]	655	NA	NA	1.1295	0.8383	dms	Dimethyl sulfide	C00580
galctn-D[p]	823	NA	NA	1.0522	0.8383	galctn-D	D-Galactonate	C00880
glyb[p]	896	NA	NA	1.0229	0.8383	glyb	Glycine betaine	C00719
cys-D[c]	576	NA	NA	1.1556	0.8383	cys-D	D-Cysteine	C00793
3hdecACP[c]	192	NA	NA	1.3394	0.8383	3hdecACP	(R)-3-Hydroxydecanoyl-[acyl-carrier protein]	C04619
4hba[c]	244	NA	NA	1.3093	0.8383	4hba	4-Hydroxy-benzyl alcohol	0
glcur[p]	873	NA	NA	1.0297	0.8383	glcur	D-Glucuronate	C00191
dms[c]	653	NA	NA	1.1313	0.8383	dms	Dimethyl sulfide	C00580
dhpppn[c]	638	NA	NA	1.1368	0.8383	dhpppn	3-(2,3-Dihydroxyphenyl)propanoate	C04044
23ccmp[p]	61	NA	NA	1.3914	0.8383	23ccmp	2',3'-Cyclic CMP	C02354
cbi[p]	483	NA	NA	1.2023	0.8383	cbi	Cobinamide	C05774
2dhglcn[c]	125	NA	NA	1.3696	0.8383	2dhglcn	2-Dehydro-D-gluconate	C00629
hexACP[c]	969	NA	NA	1.0053	0.8383	hexACP	Hexanoyl-ACP (n-C6:0ACP)	C05749
23cump[e]	64	NA	NA	1.3872	0.8383	23cump	2',3'-Cyclic UMP	C02355
3dhgulnp[c]	175	NA	NA	1.355	0.8383	3dhgulnp	3-keto-L-gulonate-6-phosphate	0
Nmtrp[c]	288	NA	NA	1.2947	0.8383	Nmtrp	N-Methyltryptophan	C02983
gal-bD[p]	814	NA	NA	1.0585	0.8383	gal-bD	beta D-Galactose	C01582
galctn-L[e]	825	NA	NA	1.0506	0.8383	galctn-L	L-Galactonate	0
g6p[p]	808	NA	NA	1.0618	0.8383	g6p	D-Glucose 6-phosphate	C00092
galt1p[c]	827	NA	NA	1.049	0.8383	galt1p	Galactitol 1-phosphate	C06311
3amp[e]	167	NA	NA	1.3616	0.8383	3amp	3'-AMP	C01367
cl[e]	517	NA	NA	1.187	0.8383	cl	Chloride	C00115
glutrna[c]	886	NA	NA	1.0267	0.8383	glutrna	L-Glutamyl-tRNA(Glu)	C02987
cyan[e]	571	NA	NA	1.1604	0.8383	cyan	Hydrogen cyanide	C01326
cynt[c]	573	NA	NA	1.1585	0.8383	cynt	Cyanate	C01417
cys-D[e]	577	NA	NA	1.1547	0.8383	cys-D	D-Cysteine	C00793
dhcinnm[c]	631	NA	NA	1.1378	0.8383	dhcinnm	2,3-dihydroxicinnamic acid	0
dmbzid[c]	650	NA	NA	1.1322	0.8383	dmbzid	5,6-Dimethylbenzimidazole	C03114
fmettrna[c]	762	NA	NA	1.0806	0.8383	fmettrna	N-Formylmethionyl-tRNA	C03294
fru[e]	772	NA	NA	1.0798	0.8383	fru	D-Fructose	C00095
frulys[c]	774	NA	NA	1.079	0.8383	frulys	fructoselysine	0
g3pc[e]	792	NA	NA	1.0691	0.8383	g3pc	sn-Glycero-3-phosphocholine	C00670
g3pi[c]	800	NA	NA	1.0674	0.8383	g3pi	sn-Glycero-3-phospho-1-inositol	C01225
g3pi[p]	802	NA	NA	1.0658	0.8383	g3pi	sn-Glycero-3-phospho-1-inositol	C01225
g3ps[e]	804	NA	NA	1.0642	0.8383	g3ps	Glycerophosphoserine	0
gal1p[e]	811	NA	NA	1.0609	0.8383	gal1p	alpha-D-Galactose 1-phosphate	C00446
gthox[e]	927	NA	NA	1.0155	0.8383	gthox	Oxidized glutathione	C00127
acgal1p[e]	308	NA	NA	1.2864	0.8383	acgal1p	N-Acetyl-D-galactosamine 1-phosphate	0
acgam1p[e]	313	NA	NA	1.2817	0.8383	acgam1p	N-Acetyl-D-glucosamine 1-phosphate	C04256
acgam[p]	318	NA	NA	1.2782	0.8383	acgam	N-Acetyl-D-glucosamine	C00140
cit[e]	512	NA	NA	1.1891	0.8383	cit	Citrate	C00158
cit[p]	513	NA	NA	1.188	0.8383	cit	Citrate	C00158
cmp[p]	528	NA	NA	1.185	0.8383	cmp	CMP	C00055
ethso3[p]	711	NA	NA	1.1098	0.8383	ethso3	ethanesulfonate	0
fe3hox[e]	739	NA	NA	1.0967	0.8383	fe3hox	Fe(III)hydroxamate	C06227
hg2[e]	971	NA	NA	1.0038	0.8383	hg2	Hg2+	C00703
hg2[p]	972	NA	NA	1.0031	0.8383	hg2	Hg2+	C00703
histrna[c]	979	NA	NA	1.0024	0.8383	histrna	L-Histidyl-tRNA(His)	C02988
hkndd[c]	980	NA	NA	1.0017	0.8383	hkndd	2-Hydroxy-6-oxonona-2,4-diene-1,9-dioate	C04479
glytrna[c]	912	NA	NA	1.0207	0.8383	glytrna	Glycyl-tRNA(Gly)	C02412
galct-D[e]	819	NA	NA	1.0553	0.8383	galct-D	D-Galactarate	C00879
feoxam-un[p]	758	NA	NA	1.0831	0.8383	feoxam-un	ferroxamine minus Fe(3)	0
ca2[e]	477	NA	NA	1.2055	0.8383	ca2	Calcium	C00076
ag[e]	360	NA	NA	1.2609	0.8383	ag	silver	C06710
galt[e]	828	NA	NA	1.0482	0.8383	galt	Galactitol	C01697
23ccmp[e]	60	NA	NA	1.3928	0.8383	23ccmp	2',3'-Cyclic CMP	C02354
5mdru1p[c]	268	NA	NA	1.302	0.8383	5mdru1p	5-Methylthio-5-deoxy-D-ribulose 1-phosphate	C04582
gly[e]	889	NA	NA	1.0259	0.8383	gly	Glycine	C00037
csn[p]	559	NA	NA	1.1692	0.8383	csn	Cytosine	C00380
ctbt[c]	560	NA	NA	1.1682	0.8383	ctbt	crotonobetaine	C04114
ctbt[p]	561	NA	NA	1.1672	0.8383	ctbt	crotonobetaine	C04114
2dh3dgal[c]	124	NA	NA	1.3709	0.8383	2dh3dgal	2-Dehydro-3-deoxy-D-galactonate	C01216
2dhguln[c]	126	NA	NA	1.3682	0.8383	2dhguln	2-Dehydro-L-gulonate	0
arbtn[p]	436	NA	NA	1.2298	0.8383	arbtn	aerobactin minus Fe3	0
hdeACP[c]	967	NA	NA	1.006	0.8383	hdeACP	cis-hexadec-9-enoyl-[acyl-carrier protein] (n-C16:1)	0
23camp[e]	58	NA	NA	1.3955	0.8383	23camp	2',3'-Cyclic AMP	C02353
3cmp[e]	172	NA	NA	1.3589	0.8383	3cmp	3'-cmp	C05822
dca[e]	601	NA	NA	1.1481	0.8383	dca	Decanoate (n-C10:0)	C01571
ddcaACP[c]	614	NA	NA	1.1424	0.8383	ddcaACP	Dodecanoyl-ACP (n-C12:0ACP)	C05223
g3ps[p]	805	NA	NA	1.0634	0.8383	g3ps	Glycerophosphoserine	0
g6p[e]	807	NA	NA	1.0626	0.8383	g6p	D-Glucose 6-phosphate	C00092
gsn[e]	924	NA	NA	1.0162	0.8383	gsn	Guanosine	C00387
5mtr[c]	271	NA	NA	1.2996	0.8383	5mtr	5-Methylthio-D-ribose	C03089
5prdmbz[c]	272	NA	NA	1.2984	0.8383	5prdmbz	N1-(5-Phospho-alpha-D-ribosyl)-5,6-dimethylbenzimidazole	C04778
agdpcbi[c]	361	NA	NA	1.2598	0.8383	agdpcbi	Adenosine-GDP-cobinamide	C06510
crn[e]	554	NA	NA	1.1731	0.8383	crn	L-Carnitine	C00318
crn[p]	555	NA	NA	1.1721	0.8383	crn	L-Carnitine	C00318
crncoa[c]	556	NA	NA	1.1711	0.8383	crncoa	L-Carnitinyl-CoA	0
cu[c]	567	NA	NA	1.1643	0.8383	cu	Cu+	0
dgmp[e]	621	NA	NA	1.1406	0.8383	dgmp	dGMP	C00362
fldox[c]	760	NA	NA	1.0823	0.8383	fldox	flavodoxin (oxidized)	C02869
3ump[p]	233	NA	NA	1.313	0.8383	3ump	3'-UMP	C01368
btal[c]	464	NA	NA	1.217	0.8383	btal	Butanal	C01412
4ahmmp[c]	240	NA	NA	1.3117	0.8383	4ahmmp	4-Amino-5-hydroxymethyl-2-methylpyrimidine	C01279
3ocddec5eACP[c]	209	NA	NA	1.3292	0.8383	3ocddec5eACP	3-oxo-cis-dodec-5-enoyl-[acyl-carrier protein]	0
3ocmrs7eACP[c]	210	NA	NA	1.3279	0.8383	3ocmrs7eACP	3-oxo-cis-myristol-7-eoyl-[acyl-carrier protein]	0
3ocpalm9eACP[c]	211	NA	NA	1.3267	0.8383	3ocpalm9eACP	3-oxo-cis-palm-9-eoyl-[acyl-carrier protein]	0
3ocvac11eACP[c]	212	NA	NA	1.3254	0.8383	3ocvac11eACP	3-oxo-cis-vacc-11-enoyl-[acyl-carrier protein]	0
3ohexACP[c]	219	NA	NA	1.3217	0.8383	3ohexACP	3-Oxohexanoyl-[acyl-carrier protein]	C05746
cenchddd[c]	502	NA	NA	1.1941	0.8383	cenchddd	cis-3-(3-carboxyethenyl)-3,5-cyclohexadiene-1,2-diol	0
chol[c]	506	NA	NA	1.1931	0.8383	chol	Choline	C00114
fe3dhbzs[c]	735	NA	NA	1.1002	0.8383	fe3dhbzs	ferric 2,3-dihydroxybenzoylserine	0
glntrna[c]	877	NA	NA	1.0274	0.8383	glntrna	L-Glutaminyl-tRNA(Gln)	C02282
hg2[c]	970	NA	NA	1.0045	0.8383	hg2	Hg2+	C00703
fe3dhbzs[e]	736	NA	NA	1.0993	0.8383	fe3dhbzs	ferric 2,3-dihydroxybenzoylserine	0
fe3dhbzs[p]	737	NA	NA	1.0984	0.8383	fe3dhbzs	ferric 2,3-dihydroxybenzoylserine	0
fe3hox[c]	738	NA	NA	1.0976	0.8383	fe3hox	Fe(III)hydroxamate	C06227
cu2[e]	565	NA	NA	1.1653	0.8383	cu2	Cu2+	0
ap5a[c]	415	NA	NA	1.243	0.8383	ap5a	P1,P5-Bis(5'-adenosyl) pentaphosphate	C04058
butso3[e]	474	NA	NA	1.2075	0.8383	butso3	butanesulfonate	0
cpgn[p]	545	NA	NA	1.181	0.8383	cpgn	coprogen	0
galur[e]	831	NA	NA	1.0459	0.8383	galur	D-Galacturonate	C00333
fe3hox-un[c]	741	NA	NA	1.095	0.8383	fe3hox-un	Fe(III)hydoxamate, unloaded	0
fe3hox-un[e]	742	NA	NA	1.0942	0.8383	fe3hox-un	Fe(III)hydoxamate, unloaded	0
3ump[e]	232	NA	NA	1.3142	0.8383	3ump	3'-UMP	C01368
fldrd[c]	761	NA	NA	1.0815	0.8383	fldrd	flavodoxin (reduced)	C02745
gfgaragund[c]	853	NA	NA	1.0358	0.8383	gfgaragund	galactofuranosyl-glucosyl-O-acetyl-rhamanosyl-N-acetylglucosamyl-undecaprenyl diphosphate	0
34dhpac[p]	165	NA	NA	1.3629	0.8383	34dhpac	3,4-Dihydroxyphenylacetaldehyde	C04043
4h2opntn[c]	243	NA	NA	1.3105	0.8383	4h2opntn	4-Hydroxy-2-oxopentanoate	C03589
4hoxpacd[e]	246	NA	NA	1.3081	0.8383	4hoxpacd	4-Hydroxyphenylacetaldehyde	C03765
acgam[e]	317	NA	NA	1.2793	0.8383	acgam	N-Acetyl-D-glucosamine	C00140
f1p[c]	715	NA	NA	1.1089	0.8383	f1p	D-Fructose 1-phosphate	C02976
fc1p[c]	724	NA	NA	1.1037	0.8383	fc1p	L-Fuculose 1-phosphate	C01099
gdp[p]	847	NA	NA	1.0366	0.8383	gdp	GDP	C00035
gln-L[e]	875	NA	NA	1.0289	0.8383	gln-L	L-Glutamine	C00064
gln-L[p]	876	NA	NA	1.0282	0.8383	gln-L	L-Glutamine	C00064
dtmp[p]	682	NA	NA	1.1151	0.8383	dtmp	dTMP	C00364
3dhguln[c]	174	NA	NA	1.3563	0.8383	3dhguln	3-Dehydro-L-gulonate	C00618
3hcinnm[e]	184	NA	NA	1.3471	0.8383	3hcinnm	3-hydroxycinnamic acid	0
3hcinnm[p]	185	NA	NA	1.3458	0.8383	3hcinnm	3-hydroxycinnamic acid	0
3hcvac11eACP[c]	188	NA	NA	1.342	0.8383	3hcvac11eACP	(R)-3-hydroxy-cis-vacc-11-enoyl-[acyl-carrier protein]	0
3hhexACP[c]	195	NA	NA	1.3381	0.8383	3hhexACP	(R)-3-Hydroxyhexanoyl-[acyl-carrier protein]	C05747
3ooctdACP[c]	223	NA	NA	1.3179	0.8383	3ooctdACP	3-Oxooctadecanoyl-[acyl-carrier protein]	0
3sala[c]	231	NA	NA	1.3155	0.8383	3sala	3-Sulfino-L-alanine	C00606
4mhetz[c]	249	NA	NA	1.3056	0.8383	4mhetz	4-Methyl-5-(2-hydroxyethyl)-thiazole	C04294
acgal1p[p]	309	NA	NA	1.2852	0.8383	acgal1p	N-Acetyl-D-galactosamine 1-phosphate	0
adocbl[p]	353	NA	NA	1.2632	0.8383	adocbl	Adenosylcobalamin	C00194
amp[e]	401	NA	NA	1.2463	0.8383	amp	AMP	C00020
asntrna[c]	448	NA	NA	1.2255	0.8383	asntrna	L-Asparaginyl-tRNA(Asn)	C03402
aso3[c]	449	NA	NA	1.2245	0.8383	aso3	arsenite	C06697
asptrna[c]	457	NA	NA	1.2202	0.8383	asptrna	L-Aspartyl-tRNA(Asp)	C02984
but[p]	472	NA	NA	1.2096	0.8383	but	Butyrate (n-C4:0)	C00246
cd2[p]	490	NA	NA	1.1982	0.8383	cd2	Cadmium	C01413
cechddd[c]	501	NA	NA	1.1951	0.8383	cechddd	cis-3-(3-carboxyethyl)-3,5-cyclohexadiene-1,2-diol	0
chol[e]	507	NA	NA	1.1921	0.8383	chol	Choline	C00114
cpgn-un[c]	546	NA	NA	1.18	0.8383	cpgn-un	coprogen unloaded (no Fe(III))	0
crn-D[p]	552	NA	NA	1.1751	0.8383	crn-D	D-Carnitine	C00487
cu[e]	568	NA	NA	1.1633	0.8383	cu	Cu+	0
dca[p]	602	NA	NA	1.1471	0.8383	dca	Decanoate (n-C10:0)	C01571
dimp[e]	643	NA	NA	1.1359	0.8383	dimp	dIMP	C06196
frulys[e]	775	NA	NA	1.0781	0.8383	frulys	fructoselysine	0
gal1p[p]	812	NA	NA	1.0601	0.8383	gal1p	alpha-D-Galactose 1-phosphate	C00446
gal-bD[e]	813	NA	NA	1.0593	0.8383	gal-bD	beta D-Galactose	C01582
galctn-D[e]	822	NA	NA	1.053	0.8383	galctn-D	D-Galactonate	C00880
galctn-L[c]	824	NA	NA	1.0514	0.8383	galctn-L	L-Galactonate	0
glcr[e]	867	NA	NA	1.0343	0.8383	glcr	D-Glucarate	C00818
glcur1p[p]	870	NA	NA	1.032	0.8383	glcur1p	D-Glucuronate 1-phosphate	C05385
glyc2p[e]	897	NA	NA	1.0222	0.8383	glyc2p	Glycerol 2-phosphate	C02979
hqn[c]	991	NA	NA	1.0002	0.8383	hqn	Hydroquinone	C00530
23cgmp[e]	62	NA	NA	1.39	0.8383	23cgmp	2',3'-Cyclic GMP	C06194
23cgmp[p]	63	NA	NA	1.3886	0.8383	23cgmp	2',3'-Cyclic GMP	C06194
3cmp[p]	173	NA	NA	1.3576	0.8383	3cmp	3'-cmp	C05822
3haACP[c]	180	NA	NA	1.351	0.8383	3haACP	(3R)-3-Hydroxyacyl-[acyl-carrier protein]	C01271
3omrsACP[c]	220	NA	NA	1.3204	0.8383	3omrsACP	3-Oxotetradecanoyl-[acyl-carrier protein]	C05759
4hoxpacd[p]	247	NA	NA	1.3068	0.8383	4hoxpacd	4-Hydroxyphenylacetaldehyde	C03765
acgal[p]	311	NA	NA	1.2829	0.8383	acgal	N-Acetyl-D-galactosamine	C01132
acmana[c]	322	NA	NA	1.277	0.8383	acmana	N-Acetyl-D-mannosamine	C00645
altrn[c]	396	NA	NA	1.2485	0.8383	altrn	D-Altronate	C00817
amob[c]	399	NA	NA	1.2474	0.8383	amob	S-Adenosyl-4-methylthio-2-oxobutanoate	C04425
amp[p]	402	NA	NA	1.2452	0.8383	amp	AMP	C00020
arbtn-fe3[e]	434	NA	NA	1.232	0.8383	arbtn-fe3	Aerobactin	C05554
arbtn-fe3[p]	435	NA	NA	1.2309	0.8383	arbtn-fe3	Aerobactin	C05554
btn[c]	466	NA	NA	1.2159	0.8383	btn	Biotin	C00120
butso3[c]	473	NA	NA	1.2086	0.8383	butso3	butanesulfonate	0
butso3[p]	475	NA	NA	1.2065	0.8383	butso3	butanesulfonate	0
cinnm[c]	510	NA	NA	1.1901	0.8383	cinnm	trans-Cinnamate	C00423
cpgn[c]	543	NA	NA	1.183	0.8383	cpgn	coprogen	0
cpgn[e]	544	NA	NA	1.182	0.8383	cpgn	coprogen	0
dcyt[p]	612	NA	NA	1.1434	0.8383	dcyt	Deoxycytidine	C00881
ddca[e]	616	NA	NA	1.1415	0.8383	ddca	Dodecanoate (n-C12:0)	C02679
dgsn[e]	624	NA	NA	1.1387	0.8383	dgsn	Deoxyguanosine	C00330
dimp[p]	644	NA	NA	1.135	0.8383	dimp	dIMP	C06196
din[e]	646	NA	NA	1.1341	0.8383	din	Deoxyinosine	C05512
gal[e]	816	NA	NA	1.0577	0.8383	gal	D-Galactose	C00124
galctn-L[p]	826	NA	NA	1.0498	0.8383	galctn-L	L-Galactonate	0
galur[c]	830	NA	NA	1.0467	0.8383	galur	D-Galacturonate	C00333
galur[p]	832	NA	NA	1.0451	0.8383	galur	D-Galacturonate	C00333
gam6p[e]	835	NA	NA	1.0443	0.8383	gam6p	D-Glucosamine 6-phosphate	C00352
glcur1p[e]	869	NA	NA	1.0327	0.8383	glcur1p	D-Glucuronate 1-phosphate	C05385
glcur[c]	871	NA	NA	1.0312	0.8383	glcur	D-Glucuronate	C00191
glyc2p[p]	898	NA	NA	1.0214	0.8383	glyc2p	Glycerol 2-phosphate	C02979
h2o2[p]	945	NA	NA	1.0096	0.8383	h2o2	Hydrogen peroxide	C00027
34dhpac[e]	164	NA	NA	1.3642	0.8383	34dhpac	3,4-Dihydroxyphenylacetaldehyde	C04043
3hcinnm[c]	183	NA	NA	1.3484	0.8383	3hcinnm	3-hydroxycinnamic acid	0
3hcpalm9eACP[c]	187	NA	NA	1.3433	0.8383	3hcpalm9eACP	(R)-3-hydroxy-cis-palm-9-eoyl-[acyl-carrier protein]	0
8aonn[c]	277	NA	NA	1.2971	0.8383	8aonn	8-Amino-7-oxononanoate	C01092
acac[c]	297	NA	NA	1.29	0.8383	acac	Acetoacetate	C00164
acgal[e]	310	NA	NA	1.284	0.8383	acgal	N-Acetyl-D-galactosamine	C01132
ala-L[e]	379	NA	NA	1.2564	0.8383	ala-L	L-Alanine	C00041
alatrna[c]	385	NA	NA	1.2541	0.8383	alatrna	L-Alanyl-tRNA(Ala)	C00886
all-D[c]	387	NA	NA	1.253	0.8383	all-D	D-Allose	C01487
arab-L[p]	428	NA	NA	1.2386	0.8383	arab-L	L-Arabinose	C00259
aragund[c]	429	NA	NA	1.2375	0.8383	aragund	O-acetyl-rhamanosyl-N-acetylglucosamyl-undecaprenyl diphosphate	0
arbt6p[c]	430	NA	NA	1.2364	0.8383	arbt6p	Arbutin 6-phosphate	C06187
arbtn-fe3[c]	433	NA	NA	1.2331	0.8383	arbtn-fe3	Aerobactin	C05554
ascb6p[c]	442	NA	NA	1.2277	0.8383	ascb6p	L-ascorbate-6-phosphate	0
ascb-L[e]	443	NA	NA	1.2266	0.8383	ascb-L	L-Ascorbate	C00072
chol[p]	508	NA	NA	1.1911	0.8383	chol	Choline	C00114
dcmp[e]	607	NA	NA	1.1462	0.8383	dcmp	dCMP	C00239
dtmp[e]	681	NA	NA	1.116	0.8383	dtmp	dTMP	C00364
dump[p]	687	NA	NA	1.1133	0.8383	dump	dUMP	C00365
frulys[p]	776	NA	NA	1.0773	0.8383	frulys	fructoselysine	0
galt[p]	829	NA	NA	1.0474	0.8383	galt	Galactitol	C01697
glcr[p]	868	NA	NA	1.0335	0.8383	glcr	D-Glucarate	C00818
h2o2[e]	944	NA	NA	1.0104	0.8383	h2o2	Hydrogen peroxide	C00027
3gmp[p]	179	NA	NA	1.3523	0.8383	3gmp	3'-GMP	C06193
3hcmrs7eACP[c]	186	NA	NA	1.3445	0.8383	3hcmrs7eACP	(R)-3-hydroxy-cis-myristol-7-eoyl-[acyl-carrier protein]	0
acac[e]	298	NA	NA	1.2888	0.8383	acac	Acetoacetate	C00164
acac[p]	299	NA	NA	1.2876	0.8383	acac	Acetoacetate	C00164
ap4a[c]	414	NA	NA	1.2441	0.8383	ap4a	P1,P4-Bis(5'-adenosyl) tetraphosphate	C01260
apoACP[c]	423	NA	NA	1.2419	0.8383	apoACP	apoprotein [acyl carrier protein]	0
arab-L[c]	426	NA	NA	1.2407	0.8383	arab-L	L-Arabinose	C00259
arab-L[e]	427	NA	NA	1.2396	0.8383	arab-L	L-Arabinose	C00259
btnso[c]	467	NA	NA	1.2149	0.8383	btnso	d-biotin d-sulfoxide	0
but2eACP[c]	468	NA	NA	1.2138	0.8383	but2eACP	But-2-enoyl-[acyl-carrier protein]	C04246
gmp[e]	917	NA	NA	1.0199	0.8383	gmp	GMP	C00144
gmp[p]	918	NA	NA	1.0192	0.8383	gmp	GMP	C00144
gp4g[c]	919	NA	NA	1.0184	0.8383	gp4g	P1,P4-Bis(5'-guanosyl) tetraphosphate	C01261
halipa[e]	956	NA	NA	1.0082	0.8383	halipa	hepta-acylated KDO(2)-lipid (A)	0
hdca[e]	960	NA	NA	1.0074	0.8383	hdca	Hexadecanoate (n-C16:0)	C00249
argtrna[c]	441	NA	NA	1.2288	0.8383	argtrna	L-Arginyl-tRNA(Arg)	C02163
cys-D[p]	578	NA	NA	1.1537	0.8383	cys-D	D-Cysteine	C00793
dcyt[e]	611	NA	NA	1.1443	0.8383	dcyt	Deoxycytidine	C00881
hacolipa[e]	955	NA	NA	1.0089	0.8383	hacolipa	hepta-acylated core oligosaccharide lipid A (E. coli)	0
12ppd-S[c]	19	NA	NA	1.3997	0.8383	12ppd-S	(S)-Propane-1,2-diol	C02917
5mta[c]	269	NA	NA	1.3008	0.8383	5mta	5-Methylthioadenosine	C00170
cbi[e]	482	NA	NA	1.2034	0.8383	cbi	Cobinamide	C05774
cdec3eACP[c]	492	NA	NA	1.1962	0.8383	cdec3eACP	cis-dec-3-enoyl-[acyl-carrier protein] (n-C10:1)	0
dms[e]	654	NA	NA	1.1304	0.8383	dms	Dimethyl sulfide	C00580
dtbt[c]	672	NA	NA	1.1169	0.8383	dtbt	Dethiobiotin	C01909
galct-D[p]	820	NA	NA	1.0545	0.8383	galct-D	D-Galactarate	C00879
glcur[e]	872	NA	NA	1.0305	0.8383	glcur	D-Glucuronate	C00191
glyb[c]	894	NA	NA	1.0244	0.8383	glyb	Glycine betaine	C00719
glyb[e]	895	NA	NA	1.0237	0.8383	glyb	Glycine betaine	C00719
grxox[c]	921	NA	NA	1.0177	0.8383	grxox	glutaredoxin (oxidized)	0
3hmrsACP[c]	196	NA	NA	1.3368	0.8383	3hmrsACP	(R)-3-Hydroxytetradecanoyl-[acyl-carrier protein]	C04688
cbi[c]	481	NA	NA	1.2044	0.8383	cbi	Cobinamide	C05774
cd2[e]	489	NA	NA	1.1992	0.8383	cd2	Cadmium	C01413
cddec5eACP[c]	491	NA	NA	1.1972	0.8383	cddec5eACP	cis-dodec-5-enoyl-[acyl-carrier protein] (n-C12:1)	0
galctn-D[c]	821	NA	NA	1.0537	0.8383	galctn-D	D-Galactonate	C00880
NA	NA	NA	NA	NA	NA	NA	#N/A	#N/A
NA	NA	NA	NA	NA	NA	NA	#N/A	#N/A
NA	NA	NA	NA	NA	NA	NA	#N/A	#N/A
NA	NA	NA	NA	NA	NA	NA	#N/A	#N/A
NA	NA	NA	NA	NA	NA	NA	#N/A	#N/A
NA	NA	NA	NA	NA	NA	NA	#N/A	#N/A
NA	NA	NA	NA	NA	NA	NA	#N/A	#N/A
NA	NA	NA	NA	NA	NA	NA	#N/A	#N/A
NA	NA	NA	NA	NA	NA	NA	#N/A	#N/A
NA	NA	NA	NA	NA	NA	NA	#N/A	#N/A
NA	NA	NA	NA	NA	NA	NA	#N/A	#N/A
NA	NA	NA	NA	NA	NA	NA	#N/A	#N/A
NA	NA	NA	NA	NA	NA	NA	#N/A	#N/A
NA	NA	NA	NA	NA	NA	NA	#N/A	#N/A
NA	NA	NA	NA	NA	NA	NA	#N/A	#N/A
NA	NA	NA	NA	NA	NA	NA	#N/A	#N/A
NA	NA	NA	NA	NA	NA	NA	#N/A	#N/A
NA	NA	NA	NA	NA	NA	NA	#N/A	#N/A
NA	NA	NA	NA	NA	NA	NA	#N/A	#N/A
NA	NA	NA	NA	NA	NA	NA	#N/A	#N/A
NA	NA	NA	NA	NA	NA	NA	#N/A	#N/A
NA	NA	NA	NA	NA	NA	NA	#N/A	#N/A
NA	NA	NA	NA	NA	NA	NA	#N/A	#N/A
NA	NA	NA	NA	NA	NA	NA	#N/A	#N/A
NA	NA	NA	NA	NA	NA	NA	#N/A	#N/A
NA	NA	NA	NA	NA	NA	NA	#N/A	#N/A
NA	NA	NA	NA	NA	NA	NA	#N/A	#N/A
NA	NA	NA	NA	NA	NA	NA	#N/A	#N/A
NA	NA	NA	NA	NA	NA	NA	#N/A	#N/A
NA	NA	NA	NA	NA	NA	NA	#N/A	#N/A
NA	NA	NA	NA	NA	NA	NA	#N/A	#N/A
NA	NA	NA	NA	NA	NA	NA	#N/A	#N/A
NA	NA	NA	NA	NA	NA	NA	#N/A	#N/A
NA	NA	NA	NA	NA	NA	NA	#N/A	#N/A
NA	NA	NA	NA	NA	NA	NA	#N/A	#N/A
NA	NA	NA	NA	NA	NA	NA	#N/A	#N/A
NA	NA	NA	NA	NA	NA	NA	#N/A	#N/A
NA	NA	NA	NA	NA	NA	NA	#N/A	#N/A
NA	NA	NA	NA	NA	NA	NA	#N/A	#N/A
NA	NA	NA	NA	NA	NA	NA	#N/A	#N/A
NA	NA	NA	NA	NA	NA	NA	#N/A	#N/A
NA	NA	NA	NA	NA	NA	NA	#N/A	#N/A
NA	NA	NA	NA	NA	NA	NA	#N/A	#N/A
NA	NA	NA	NA	NA	NA	NA	#N/A	#N/A
NA	NA	NA	NA	NA	NA	NA	#N/A	#N/A
NA	NA	NA	NA	NA	NA	NA	#N/A	#N/A
NA	NA	NA	NA	NA	NA	NA	#N/A	#N/A
NA	NA	NA	NA	NA	NA	NA	#N/A	#N/A
NA	NA	NA	NA	NA	NA	NA	#N/A	#N/A
NA	NA	NA	NA	NA	NA	NA	#N/A	#N/A
NA	NA	NA	NA	NA	NA	NA	#N/A	#N/A
NA	NA	NA	NA	NA	NA	NA	#N/A	#N/A
NA	NA	NA	NA	NA	NA	NA	#N/A	#N/A
NA	NA	NA	NA	NA	NA	NA	#N/A	#N/A
NA	NA	NA	NA	NA	NA	NA	#N/A	#N/A
NA	NA	NA	NA	NA	NA	NA	#N/A	#N/A
NA	NA	NA	NA	NA	NA	NA	#N/A	#N/A
NA	NA	NA	NA	NA	NA	NA	#N/A	#N/A
NA	NA	NA	NA	NA	NA	NA	#N/A	#N/A
NA	NA	NA	NA	NA	NA	NA	#N/A	#N/A
NA	NA	NA	NA	NA	NA	NA	#N/A	#N/A
NA	NA	NA	NA	NA	NA	NA	#N/A	#N/A
NA	NA	NA	NA	NA	NA	NA	#N/A	#N/A
NA	NA	NA	NA	NA	NA	NA	#N/A	#N/A
NA	NA	NA	NA	NA	NA	NA	#N/A	#N/A
NA	NA	NA	NA	NA	NA	NA	#N/A	#N/A
NA	NA	NA	NA	NA	NA	NA	#N/A	#N/A
NA	NA	NA	NA	NA	NA	NA	#N/A	#N/A
NA	NA	NA	NA	NA	NA	NA	#N/A	#N/A
NA	NA	NA	NA	NA	NA	NA	#N/A	#N/A
NA	NA	NA	NA	NA	NA	NA	#N/A	#N/A
NA	NA	NA	NA	NA	NA	NA	#N/A	#N/A
NA	NA	NA	NA	NA	NA	NA	#N/A	#N/A
NA	NA	NA	NA	NA	NA	NA	#N/A	#N/A
NA	NA	NA	NA	NA	NA	NA	#N/A	#N/A
NA	NA	NA	NA	NA	NA	NA	#N/A	#N/A
NA	NA	NA	NA	NA	NA	NA	#N/A	#N/A
NA	NA	NA	NA	NA	NA	NA	#N/A	#N/A
NA	NA	NA	NA	NA	NA	NA	#N/A	#N/A
NA	NA	NA	NA	NA	NA	NA	#N/A	#N/A
NA	NA	NA	NA	NA	NA	NA	#N/A	#N/A
NA	NA	NA	NA	NA	NA	NA	#N/A	#N/A
NA	NA	NA	NA	NA	NA	NA	#N/A	#N/A
NA	NA	NA	NA	NA	NA	NA	#N/A	#N/A
NA	NA	NA	NA	NA	NA	NA	#N/A	#N/A
NA	NA	NA	NA	NA	NA	NA	#N/A	#N/A
NA	NA	NA	NA	NA	NA	NA	#N/A	#N/A
NA	NA	NA	NA	NA	NA	NA	#N/A	#N/A
NA	NA	NA	NA	NA	NA	NA	#N/A	#N/A
NA	NA	NA	NA	NA	NA	NA	#N/A	#N/A
NA	NA	NA	NA	NA	NA	NA	#N/A	#N/A
NA	NA	NA	NA	NA	NA	NA	#N/A	#N/A
NA	NA	NA	NA	NA	NA	NA	#N/A	#N/A
NA	NA	NA	NA	NA	NA	NA	#N/A	#N/A
NA	NA	NA	NA	NA	NA	NA	#N/A	#N/A
NA	NA	NA	NA	NA	NA	NA	#N/A	#N/A
NA	NA	NA	NA	NA	NA	NA	#N/A	#N/A
NA	NA	NA	NA	NA	NA	NA	#N/A	#N/A
NA	NA	NA	NA	NA	NA	NA	#N/A	#N/A
NA	NA	NA	NA	NA	NA	NA	#N/A	#N/A
NA	NA	NA	NA	NA	NA	NA	#N/A	#N/A
NA	NA	NA	NA	NA	NA	NA	#N/A	#N/A
NA	NA	NA	NA	NA	NA	NA	#N/A	#N/A
NA	NA	NA	NA	NA	NA	NA	#N/A	#N/A
NA	NA	NA	NA	NA	NA	NA	#N/A	#N/A
NA	NA	NA	NA	NA	NA	NA	#N/A	#N/A
NA	NA	NA	NA	NA	NA	NA	#N/A	#N/A
NA	NA	NA	NA	NA	NA	NA	#N/A	#N/A
NA	NA	NA	NA	NA	NA	NA	#N/A	#N/A
NA	NA	NA	NA	NA	NA	NA	#N/A	#N/A
NA	NA	NA	NA	NA	NA	NA	#N/A	#N/A
NA	NA	NA	NA	NA	NA	NA	#N/A	#N/A
NA	NA	NA	NA	NA	NA	NA	#N/A	#N/A
NA	NA	NA	NA	NA	NA	NA	#N/A	#N/A
NA	NA	NA	NA	NA	NA	NA	#N/A	#N/A
NA	NA	NA	NA	NA	NA	NA	#N/A	#N/A
NA	NA	NA	NA	NA	NA	NA	#N/A	#N/A
NA	NA	NA	NA	NA	NA	NA	#N/A	#N/A
NA	NA	NA	NA	NA	NA	NA	#N/A	#N/A
NA	NA	NA	NA	NA	NA	NA	#N/A	#N/A
NA	NA	NA	NA	NA	NA	NA	#N/A	#N/A
NA	NA	NA	NA	NA	NA	NA	#N/A	#N/A
NA	NA	NA	NA	NA	NA	NA	#N/A	#N/A
NA	NA	NA	NA	NA	NA	NA	#N/A	#N/A
NA	NA	NA	NA	NA	NA	NA	#N/A	#N/A
NA	NA	NA	NA	NA	NA	NA	#N/A	#N/A
NA	NA	NA	NA	NA	NA	NA	#N/A	#N/A
NA	NA	NA	NA	NA	NA	NA	#N/A	#N/A
NA	NA	NA	NA	NA	NA	NA	#N/A	#N/A
NA	NA	NA	NA	NA	NA	NA	#N/A	#N/A
NA	NA	NA	NA	NA	NA	NA	#N/A	#N/A
NA	NA	NA	NA	NA	NA	NA	#N/A	#N/A
NA	NA	NA	NA	NA	NA	NA	#N/A	#N/A
NA	NA	NA	NA	NA	NA	NA	#N/A	#N/A
NA	NA	NA	NA	NA	NA	NA	#N/A	#N/A
NA	NA	NA	NA	NA	NA	NA	#N/A	#N/A
NA	NA	NA	NA	NA	NA	NA	#N/A	#N/A
NA	NA	NA	NA	NA	NA	NA	#N/A	#N/A
NA	NA	NA	NA	NA	NA	NA	#N/A	#N/A
NA	NA	NA	NA	NA	NA	NA	#N/A	#N/A
NA	NA	NA	NA	NA	NA	NA	#N/A	#N/A
NA	NA	NA	NA	NA	NA	NA	#N/A	#N/A
NA	NA	NA	NA	NA	NA	NA	#N/A	#N/A
NA	NA	NA	NA	NA	NA	NA	#N/A	#N/A
NA	NA	NA	NA	NA	NA	NA	#N/A	#N/A
NA	NA	NA	NA	NA	NA	NA	#N/A	#N/A
NA	NA	NA	NA	NA	NA	NA	#N/A	#N/A
NA	NA	NA	NA	NA	NA	NA	#N/A	#N/A
NA	NA	NA	NA	NA	NA	NA	#N/A	#N/A
NA	NA	NA	NA	NA	NA	NA	#N/A	#N/A
NA	NA	NA	NA	NA	NA	NA	#N/A	#N/A
NA	NA	NA	NA	NA	NA	NA	#N/A	#N/A
NA	NA	NA	NA	NA	NA	NA	#N/A	#N/A
NA	NA	NA	NA	NA	NA	NA	#N/A	#N/A
NA	NA	NA	NA	NA	NA	NA	#N/A	#N/A
NA	NA	NA	NA	NA	NA	NA	#N/A	#N/A
NA	NA	NA	NA	NA	NA	NA	#N/A	#N/A
NA	NA	NA	NA	NA	NA	NA	#N/A	#N/A
NA	NA	NA	NA	NA	NA	NA	#N/A	#N/A
NA	NA	NA	NA	NA	NA	NA	#N/A	#N/A
NA	NA	NA	NA	NA	NA	NA	#N/A	#N/A
NA	NA	NA	NA	NA	NA	NA	#N/A	#N/A
NA	NA	NA	NA	NA	NA	NA	#N/A	#N/A
NA	NA	NA	NA	NA	NA	NA	#N/A	#N/A
NA	NA	NA	NA	NA	NA	NA	#N/A	#N/A
NA	NA	NA	NA	NA	NA	NA	#N/A	#N/A
NA	NA	NA	NA	NA	NA	NA	#N/A	#N/A
NA	NA	NA	NA	NA	NA	NA	#N/A	#N/A
NA	NA	NA	NA	NA	NA	NA	#N/A	#N/A
NA	NA	NA	NA	NA	NA	NA	#N/A	#N/A
NA	NA	NA	NA	NA	NA	NA	#N/A	#N/A
NA	NA	NA	NA	NA	NA	NA	#N/A	#N/A
NA	NA	NA	NA	NA	NA	NA	#N/A	#N/A
NA	NA	NA	NA	NA	NA	NA	#N/A	#N/A
NA	NA	NA	NA	NA	NA	NA	#N/A	#N/A
NA	NA	NA	NA	NA	NA	NA	#N/A	#N/A
NA	NA	NA	NA	NA	NA	NA	#N/A	#N/A
NA	NA	NA	NA	NA	NA	NA	#N/A	#N/A
NA	NA	NA	NA	NA	NA	NA	#N/A	#N/A
NA	NA	NA	NA	NA	NA	NA	#N/A	#N/A
NA	NA	NA	NA	NA	NA	NA	#N/A	#N/A
NA	NA	NA	NA	NA	NA	NA	#N/A	#N/A
NA	NA	NA	NA	NA	NA	NA	#N/A	#N/A
NA	NA	NA	NA	NA	NA	NA	#N/A	#N/A
NA	NA	NA	NA	NA	NA	NA	#N/A	#N/A
NA	NA	NA	NA	NA	NA	NA	#N/A	#N/A
NA	NA	NA	NA	NA	NA	NA	#N/A	#N/A
NA	NA	NA	NA	NA	NA	NA	#N/A	#N/A
NA	NA	NA	NA	NA	NA	NA	#N/A	#N/A
NA	NA	NA	NA	NA	NA	NA	#N/A	#N/A
NA	NA	NA	NA	NA	NA	NA	#N/A	#N/A
NA	NA	NA	NA	NA	NA	NA	#N/A	#N/A
NA	NA	NA	NA	NA	NA	NA	#N/A	#N/A
NA	NA	NA	NA	NA	NA	NA	#N/A	#N/A
NA	NA	NA	NA	NA	NA	NA	#N/A	#N/A
NA	NA	NA	NA	NA	NA	NA	#N/A	#N/A
NA	NA	NA	NA	NA	NA	NA	#N/A	#N/A
NA	NA	NA	NA	NA	NA	NA	#N/A	#N/A
NA	NA	NA	NA	NA	NA	NA	#N/A	#N/A
NA	NA	NA	NA	NA	NA	NA	#N/A	#N/A
NA	NA	NA	NA	NA	NA	NA	#N/A	#N/A
NA	NA	NA	NA	NA	NA	NA	#N/A	#N/A
NA	NA	NA	NA	NA	NA	NA	#N/A	#N/A
NA	NA	NA	NA	NA	NA	NA	#N/A	#N/A
NA	NA	NA	NA	NA	NA	NA	#N/A	#N/A
NA	NA	NA	NA	NA	NA	NA	#N/A	#N/A
NA	NA	NA	NA	NA	NA	NA	#N/A	#N/A
NA	NA	NA	NA	NA	NA	NA	#N/A	#N/A
NA	NA	NA	NA	NA	NA	NA	#N/A	#N/A
NA	NA	NA	NA	NA	NA	NA	#N/A	#N/A
NA	NA	NA	NA	NA	NA	NA	#N/A	#N/A
NA	NA	NA	NA	NA	NA	NA	#N/A	#N/A
NA	NA	NA	NA	NA	NA	NA	#N/A	#N/A
NA	NA	NA	NA	NA	NA	NA	#N/A	#N/A
NA	NA	NA	NA	NA	NA	NA	#N/A	#N/A
NA	NA	NA	NA	NA	NA	NA	#N/A	#N/A
NA	NA	NA	NA	NA	NA	NA	#N/A	#N/A
NA	NA	NA	NA	NA	NA	NA	#N/A	#N/A
NA	NA	NA	NA	NA	NA	NA	#N/A	#N/A
NA	NA	NA	NA	NA	NA	NA	#N/A	#N/A
NA	NA	NA	NA	NA	NA	NA	#N/A	#N/A
NA	NA	NA	NA	NA	NA	NA	#N/A	#N/A
NA	NA	NA	NA	NA	NA	NA	#N/A	#N/A
NA	NA	NA	NA	NA	NA	NA	#N/A	#N/A
NA	NA	NA	NA	NA	NA	NA	#N/A	#N/A
NA	NA	NA	NA	NA	NA	NA	#N/A	#N/A
NA	NA	NA	NA	NA	NA	NA	#N/A	#N/A
NA	NA	NA	NA	NA	NA	NA	#N/A	#N/A
NA	NA	NA	NA	NA	NA	NA	#N/A	#N/A
NA	NA	NA	NA	NA	NA	NA	#N/A	#N/A
NA	NA	NA	NA	NA	NA	NA	#N/A	#N/A
NA	NA	NA	NA	NA	NA	NA	#N/A	#N/A
NA	NA	NA	NA	NA	NA	NA	#N/A	#N/A
NA	NA	NA	NA	NA	NA	NA	#N/A	#N/A
NA	NA	NA	NA	NA	NA	NA	#N/A	#N/A
NA	NA	NA	NA	NA	NA	NA	#N/A	#N/A
NA	NA	NA	NA	NA	NA	NA	#N/A	#N/A
NA	NA	NA	NA	NA	NA	NA	#N/A	#N/A
NA	NA	NA	NA	NA	NA	NA	#N/A	#N/A
NA	NA	NA	NA	NA	NA	NA	#N/A	#N/A
NA	NA	NA	NA	NA	NA	NA	#N/A	#N/A
NA	NA	NA	NA	NA	NA	NA	#N/A	#N/A
NA	NA	NA	NA	NA	NA	NA	#N/A	#N/A
NA	NA	NA	NA	NA	NA	NA	#N/A	#N/A
NA	NA	NA	NA	NA	NA	NA	#N/A	#N/A
NA	NA	NA	NA	NA	NA	NA	#N/A	#N/A
NA	NA	NA	NA	NA	NA	NA	#N/A	#N/A
NA	NA	NA	NA	NA	NA	NA	#N/A	#N/A
NA	NA	NA	NA	NA	NA	NA	#N/A	#N/A
NA	NA	NA	NA	NA	NA	NA	#N/A	#N/A
NA	NA	NA	NA	NA	NA	NA	#N/A	#N/A
NA	NA	NA	NA	NA	NA	NA	#N/A	#N/A
NA	NA	NA	NA	NA	NA	NA	#N/A	#N/A
NA	NA	NA	NA	NA	NA	NA	#N/A	#N/A
NA	NA	NA	NA	NA	NA	NA	#N/A	#N/A
NA	NA	NA	NA	NA	NA	NA	#N/A	#N/A
NA	NA	NA	NA	NA	NA	NA	#N/A	#N/A
NA	NA	NA	NA	NA	NA	NA	#N/A	#N/A
NA	NA	NA	NA	NA	NA	NA	#N/A	#N/A
NA	NA	NA	NA	NA	NA	NA	#N/A	#N/A
NA	NA	NA	NA	NA	NA	NA	#N/A	#N/A
NA	NA	NA	NA	NA	NA	NA	#N/A	#N/A
NA	NA	NA	NA	NA	NA	NA	#N/A	#N/A
NA	NA	NA	NA	NA	NA	NA	#N/A	#N/A
NA	NA	NA	NA	NA	NA	NA	#N/A	#N/A
NA	NA	NA	NA	NA	NA	NA	#N/A	#N/A
NA	NA	NA	NA	NA	NA	NA	#N/A	#N/A
NA	NA	NA	NA	NA	NA	NA	#N/A	#N/A
NA	NA	NA	NA	NA	NA	NA	#N/A	#N/A
NA	NA	NA	NA	NA	NA	NA	#N/A	#N/A
NA	NA	NA	NA	NA	NA	NA	#N/A	#N/A
NA	NA	NA	NA	NA	NA	NA	#N/A	#N/A
NA	NA	NA	NA	NA	NA	NA	#N/A	#N/A
NA	NA	NA	NA	NA	NA	NA	#N/A	#N/A
NA	NA	NA	NA	NA	NA	NA	#N/A	#N/A
NA	NA	NA	NA	NA	NA	NA	#N/A	#N/A
NA	NA	NA	NA	NA	NA	NA	#N/A	#N/A
NA	NA	NA	NA	NA	NA	NA	#N/A	#N/A
NA	NA	NA	NA	NA	NA	NA	#N/A	#N/A
NA	NA	NA	NA	NA	NA	NA	#N/A	#N/A
NA	NA	NA	NA	NA	NA	NA	#N/A	#N/A
NA	NA	NA	NA	NA	NA	NA	#N/A	#N/A
NA	NA	NA	NA	NA	NA	NA	#N/A	#N/A
NA	NA	NA	NA	NA	NA	NA	#N/A	#N/A
NA	NA	NA	NA	NA	NA	NA	#N/A	#N/A
NA	NA	NA	NA	NA	NA	NA	#N/A	#N/A
NA	NA	NA	NA	NA	NA	NA	#N/A	#N/A
NA	NA	NA	NA	NA	NA	NA	#N/A	#N/A
NA	NA	NA	NA	NA	NA	NA	#N/A	#N/A
NA	NA	NA	NA	NA	NA	NA	#N/A	#N/A
NA	NA	NA	NA	NA	NA	NA	#N/A	#N/A
NA	NA	NA	NA	NA	NA	NA	#N/A	#N/A
NA	NA	NA	NA	NA	NA	NA	#N/A	#N/A
NA	NA	NA	NA	NA	NA	NA	#N/A	#N/A
NA	NA	NA	NA	NA	NA	NA	#N/A	#N/A
NA	NA	NA	NA	NA	NA	NA	#N/A	#N/A
NA	NA	NA	NA	NA	NA	NA	#N/A	#N/A
NA	NA	NA	NA	NA	NA	NA	#N/A	#N/A
NA	NA	NA	NA	NA	NA	NA	#N/A	#N/A
NA	NA	NA	NA	NA	NA	NA	#N/A	#N/A
NA	NA	NA	NA	NA	NA	NA	#N/A	#N/A
NA	NA	NA	NA	NA	NA	NA	#N/A	#N/A
NA	NA	NA	NA	NA	NA	NA	#N/A	#N/A
NA	NA	NA	NA	NA	NA	NA	#N/A	#N/A
NA	NA	NA	NA	NA	NA	NA	#N/A	#N/A
NA	NA	NA	NA	NA	NA	NA	#N/A	#N/A
NA	NA	NA	NA	NA	NA	NA	#N/A	#N/A
NA	NA	NA	NA	NA	NA	NA	#N/A	#N/A
NA	NA	NA	NA	NA	NA	NA	#N/A	#N/A
NA	NA	NA	NA	NA	NA	NA	#N/A	#N/A
NA	NA	NA	NA	NA	NA	NA	#N/A	#N/A
NA	NA	NA	NA	NA	NA	NA	#N/A	#N/A
NA	NA	NA	NA	NA	NA	NA	#N/A	#N/A
NA	NA	NA	NA	NA	NA	NA	#N/A	#N/A
NA	NA	NA	NA	NA	NA	NA	#N/A	#N/A
NA	NA	NA	NA	NA	NA	NA	#N/A	#N/A
NA	NA	NA	NA	NA	NA	NA	#N/A	#N/A
NA	NA	NA	NA	NA	NA	NA	#N/A	#N/A
NA	NA	NA	NA	NA	NA	NA	#N/A	#N/A
NA	NA	NA	NA	NA	NA	NA	#N/A	#N/A
NA	NA	NA	NA	NA	NA	NA	#N/A	#N/A
NA	NA	NA	NA	NA	NA	NA	#N/A	#N/A
NA	NA	NA	NA	NA	NA	NA	#N/A	#N/A
NA	NA	NA	NA	NA	NA	NA	#N/A	#N/A
NA	NA	NA	NA	NA	NA	NA	#N/A	#N/A
NA	NA	NA	NA	NA	NA	NA	#N/A	#N/A
NA	NA	NA	NA	NA	NA	NA	#N/A	#N/A
NA	NA	NA	NA	NA	NA	NA	#N/A	#N/A
NA	NA	NA	NA	NA	NA	NA	#N/A	#N/A
NA	NA	NA	NA	NA	NA	NA	#N/A	#N/A
NA	NA	NA	NA	NA	NA	NA	#N/A	#N/A
NA	NA	NA	NA	NA	NA	NA	#N/A	#N/A
NA	NA	NA	NA	NA	NA	NA	#N/A	#N/A
NA	NA	NA	NA	NA	NA	NA	#N/A	#N/A
NA	NA	NA	NA	NA	NA	NA	#N/A	#N/A
NA	NA	NA	NA	NA	NA	NA	#N/A	#N/A
NA	NA	NA	NA	NA	NA	NA	#N/A	#N/A
NA	NA	NA	NA	NA	NA	NA	#N/A	#N/A
NA	NA	NA	NA	NA	NA	NA	#N/A	#N/A
NA	NA	NA	NA	NA	NA	NA	#N/A	#N/A
NA	NA	NA	NA	NA	NA	NA	#N/A	#N/A
NA	NA	NA	NA	NA	NA	NA	#N/A	#N/A
NA	NA	NA	NA	NA	NA	NA	#N/A	#N/A
NA	NA	NA	NA	NA	NA	NA	#N/A	#N/A
NA	NA	NA	NA	NA	NA	NA	#N/A	#N/A
NA	NA	NA	NA	NA	NA	NA	#N/A	#N/A
NA	NA	NA	NA	NA	NA	NA	#N/A	#N/A
NA	NA	NA	NA	NA	NA	NA	#N/A	#N/A
NA	NA	NA	NA	NA	NA	NA	#N/A	#N/A
NA	NA	NA	NA	NA	NA	NA	#N/A	#N/A
NA	NA	NA	NA	NA	NA	NA	#N/A	#N/A
NA	NA	NA	NA	NA	NA	NA	#N/A	#N/A
NA	NA	NA	NA	NA	NA	NA	#N/A	#N/A
NA	NA	NA	NA	NA	NA	NA	#N/A	#N/A
NA	NA	NA	NA	NA	NA	NA	#N/A	#N/A
NA	NA	NA	NA	NA	NA	NA	#N/A	#N/A
NA	NA	NA	NA	NA	NA	NA	#N/A	#N/A
NA	NA	NA	NA	NA	NA	NA	#N/A	#N/A
NA	NA	NA	NA	NA	NA	NA	#N/A	#N/A
NA	NA	NA	NA	NA	NA	NA	#N/A	#N/A
NA	NA	NA	NA	NA	NA	NA	#N/A	#N/A
NA	NA	NA	NA	NA	NA	NA	#N/A	#N/A
NA	NA	NA	NA	NA	NA	NA	#N/A	#N/A
NA	NA	NA	NA	NA	NA	NA	#N/A	#N/A
NA	NA	NA	NA	NA	NA	NA	#N/A	#N/A
NA	NA	NA	NA	NA	NA	NA	#N/A	#N/A
NA	NA	NA	NA	NA	NA	NA	#N/A	#N/A
NA	NA	NA	NA	NA	NA	NA	#N/A	#N/A
NA	NA	NA	NA	NA	NA	NA	#N/A	#N/A
NA	NA	NA	NA	NA	NA	NA	#N/A	#N/A
NA	NA	NA	NA	NA	NA	NA	#N/A	#N/A
NA	NA	NA	NA	NA	NA	NA	#N/A	#N/A
NA	NA	NA	NA	NA	NA	NA	#N/A	#N/A
NA	NA	NA	NA	NA	NA	NA	#N/A	#N/A
NA	NA	NA	NA	NA	NA	NA	#N/A	#N/A
NA	NA	NA	NA	NA	NA	NA	#N/A	#N/A
NA	NA	NA	NA	NA	NA	NA	#N/A	#N/A
NA	NA	NA	NA	NA	NA	NA	#N/A	#N/A
NA	NA	NA	NA	NA	NA	NA	#N/A	#N/A
NA	NA	NA	NA	NA	NA	NA	#N/A	#N/A
NA	NA	NA	NA	NA	NA	NA	#N/A	#N/A
NA	NA	NA	NA	NA	NA	NA	#N/A	#N/A
NA	NA	NA	NA	NA	NA	NA	#N/A	#N/A
NA	NA	NA	NA	NA	NA	NA	#N/A	#N/A
NA	NA	NA	NA	NA	NA	NA	#N/A	#N/A
NA	NA	NA	NA	NA	NA	NA	#N/A	#N/A
NA	NA	NA	NA	NA	NA	NA	#N/A	#N/A
NA	NA	NA	NA	NA	NA	NA	#N/A	#N/A
NA	NA	NA	NA	NA	NA	NA	#N/A	#N/A
NA	NA	NA	NA	NA	NA	NA	#N/A	#N/A
NA	NA	NA	NA	NA	NA	NA	#N/A	#N/A
NA	NA	NA	NA	NA	NA	NA	#N/A	#N/A
NA	NA	NA	NA	NA	NA	NA	#N/A	#N/A
NA	NA	NA	NA	NA	NA	NA	#N/A	#N/A
NA	NA	NA	NA	NA	NA	NA	#N/A	#N/A
NA	NA	NA	NA	NA	NA	NA	#N/A	#N/A
NA	NA	NA	NA	NA	NA	NA	#N/A	#N/A
NA	NA	NA	NA	NA	NA	NA	#N/A	#N/A
NA	NA	NA	NA	NA	NA	NA	#N/A	#N/A
NA	NA	NA	NA	NA	NA	NA	#N/A	#N/A
NA	NA	NA	NA	NA	NA	NA	#N/A	#N/A
NA	NA	NA	NA	NA	NA	NA	#N/A	#N/A
NA	NA	NA	NA	NA	NA	NA	#N/A	#N/A
NA	NA	NA	NA	NA	NA	NA	#N/A	#N/A
NA	NA	NA	NA	NA	NA	NA	#N/A	#N/A
NA	NA	NA	NA	NA	NA	NA	#N/A	#N/A
NA	NA	NA	NA	NA	NA	NA	#N/A	#N/A
NA	NA	NA	NA	NA	NA	NA	#N/A	#N/A
NA	NA	NA	NA	NA	NA	NA	#N/A	#N/A
NA	NA	NA	NA	NA	NA	NA	#N/A	#N/A
NA	NA	NA	NA	NA	NA	NA	#N/A	#N/A
NA	NA	NA	NA	NA	NA	NA	#N/A	#N/A
NA	NA	NA	NA	NA	NA	NA	#N/A	#N/A
NA	NA	NA	NA	NA	NA	NA	#N/A	#N/A
NA	NA	NA	NA	NA	NA	NA	#N/A	#N/A
NA	NA	NA	NA	NA	NA	NA	#N/A	#N/A
NA	NA	NA	NA	NA	NA	NA	#N/A	#N/A
NA	NA	NA	NA	NA	NA	NA	#N/A	#N/A
NA	NA	NA	NA	NA	NA	NA	#N/A	#N/A
NA	NA	NA	NA	NA	NA	NA	#N/A	#N/A
NA	NA	NA	NA	NA	NA	NA	#N/A	#N/A
NA	NA	NA	NA	NA	NA	NA	#N/A	#N/A
NA	NA	NA	NA	NA	NA	NA	#N/A	#N/A
NA	NA	NA	NA	NA	NA	NA	#N/A	#N/A
NA	NA	NA	NA	NA	NA	NA	#N/A	#N/A
NA	NA	NA	NA	NA	NA	NA	#N/A	#N/A
NA	NA	NA	NA	NA	NA	NA	#N/A	#N/A
NA	NA	NA	NA	NA	NA	NA	#N/A	#N/A
NA	NA	NA	NA	NA	NA	NA	#N/A	#N/A
NA	NA	NA	NA	NA	NA	NA	#N/A	#N/A
NA	NA	NA	NA	NA	NA	NA	#N/A	#N/A
NA	NA	NA	NA	NA	NA	NA	#N/A	#N/A
NA	NA	NA	NA	NA	NA	NA	#N/A	#N/A
NA	NA	NA	NA	NA	NA	NA	#N/A	#N/A
NA	NA	NA	NA	NA	NA	NA	#N/A	#N/A
NA	NA	NA	NA	NA	NA	NA	#N/A	#N/A
NA	NA	NA	NA	NA	NA	NA	#N/A	#N/A
NA	NA	NA	NA	NA	NA	NA	#N/A	#N/A
NA	NA	NA	NA	NA	NA	NA	#N/A	#N/A
NA	NA	NA	NA	NA	NA	NA	#N/A	#N/A
NA	NA	NA	NA	NA	NA	NA	#N/A	#N/A
NA	NA	NA	NA	NA	NA	NA	#N/A	#N/A
NA	NA	NA	NA	NA	NA	NA	#N/A	#N/A
NA	NA	NA	NA	NA	NA	NA	#N/A	#N/A
NA	NA	NA	NA	NA	NA	NA	#N/A	#N/A
NA	NA	NA	NA	NA	NA	NA	#N/A	#N/A
NA	NA	NA	NA	NA	NA	NA	#N/A	#N/A
NA	NA	NA	NA	NA	NA	NA	#N/A	#N/A
NA	NA	NA	NA	NA	NA	NA	#N/A	#N/A
NA	NA	NA	NA	NA	NA	NA	#N/A	#N/A
NA	NA	NA	NA	NA	NA	NA	#N/A	#N/A
NA	NA	NA	NA	NA	NA	NA	#N/A	#N/A
NA	NA	NA	NA	NA	NA	NA	#N/A	#N/A
NA	NA	NA	NA	NA	NA	NA	#N/A	#N/A
NA	NA	NA	NA	NA	NA	NA	#N/A	#N/A
NA	NA	NA	NA	NA	NA	NA	#N/A	#N/A
NA	NA	NA	NA	NA	NA	NA	#N/A	#N/A
NA	NA	NA	NA	NA	NA	NA	#N/A	#N/A
NA	NA	NA	NA	NA	NA	NA	#N/A	#N/A
NA	NA	NA	NA	NA	NA	NA	#N/A	#N/A
NA	NA	NA	NA	NA	NA	NA	#N/A	#N/A
NA	NA	NA	NA	NA	NA	NA	#N/A	#N/A
NA	NA	NA	NA	NA	NA	NA	#N/A	#N/A
NA	NA	NA	NA	NA	NA	NA	#N/A	#N/A
NA	NA	NA	NA	NA	NA	NA	#N/A	#N/A
NA	NA	NA	NA	NA	NA	NA	#N/A	#N/A
NA	NA	NA	NA	NA	NA	NA	#N/A	#N/A
NA	NA	NA	NA	NA	NA	NA	#N/A	#N/A
NA	NA	NA	NA	NA	NA	NA	#N/A	#N/A
NA	NA	NA	NA	NA	NA	NA	#N/A	#N/A
NA	NA	NA	NA	NA	NA	NA	#N/A	#N/A
NA	NA	NA	NA	NA	NA	NA	#N/A	#N/A
NA	NA	NA	NA	NA	NA	NA	#N/A	#N/A
NA	NA	NA	NA	NA	NA	NA	#N/A	#N/A
NA	NA	NA	NA	NA	NA	NA	#N/A	#N/A
NA	NA	NA	NA	NA	NA	NA	#N/A	#N/A
NA	NA	NA	NA	NA	NA	NA	#N/A	#N/A
NA	NA	NA	NA	NA	NA	NA	#N/A	#N/A
NA	NA	NA	NA	NA	NA	NA	#N/A	#N/A
NA	NA	NA	NA	NA	NA	NA	#N/A	#N/A
NA	NA	NA	NA	NA	NA	NA	#N/A	#N/A
NA	NA	NA	NA	NA	NA	NA	#N/A	#N/A
NA	NA	NA	NA	NA	NA	NA	#N/A	#N/A
NA	NA	NA	NA	NA	NA	NA	#N/A	#N/A
NA	NA	NA	NA	NA	NA	NA	#N/A	#N/A
NA	NA	NA	NA	NA	NA	NA	#N/A	#N/A
NA	NA	NA	NA	NA	NA	NA	#N/A	#N/A
NA	NA	NA	NA	NA	NA	NA	#N/A	#N/A
NA	NA	NA	NA	NA	NA	NA	#N/A	#N/A
NA	NA	NA	NA	NA	NA	NA	#N/A	#N/A
NA	NA	NA	NA	NA	NA	NA	#N/A	#N/A
NA	NA	NA	NA	NA	NA	NA	#N/A	#N/A
NA	NA	NA	NA	NA	NA	NA	#N/A	#N/A
NA	NA	NA	NA	NA	NA	NA	#N/A	#N/A
NA	NA	NA	NA	NA	NA	NA	#N/A	#N/A
NA	NA	NA	NA	NA	NA	NA	#N/A	#N/A
NA	NA	NA	NA	NA	NA	NA	#N/A	#N/A
NA	NA	NA	NA	NA	NA	NA	#N/A	#N/A
NA	NA	NA	NA	NA	NA	NA	#N/A	#N/A
NA	NA	NA	NA	NA	NA	NA	#N/A	#N/A
NA	NA	NA	NA	NA	NA	NA	#N/A	#N/A
NA	NA	NA	NA	NA	NA	NA	#N/A	#N/A
NA	NA	NA	NA	NA	NA	NA	#N/A	#N/A
NA	NA	NA	NA	NA	NA	NA	#N/A	#N/A
NA	NA	NA	NA	NA	NA	NA	#N/A	#N/A
NA	NA	NA	NA	NA	NA	NA	#N/A	#N/A
NA	NA	NA	NA	NA	NA	NA	#N/A	#N/A
NA	NA	NA	NA	NA	NA	NA	#N/A	#N/A
NA	NA	NA	NA	NA	NA	NA	#N/A	#N/A
NA	NA	NA	NA	NA	NA	NA	#N/A	#N/A
NA	NA	NA	NA	NA	NA	NA	#N/A	#N/A
NA	NA	NA	NA	NA	NA	NA	#N/A	#N/A
NA	NA	NA	NA	NA	NA	NA	#N/A	#N/A
NA	NA	NA	NA	NA	NA	NA	#N/A	#N/A
NA	NA	NA	NA	NA	NA	NA	#N/A	#N/A
NA	NA	NA	NA	NA	NA	NA	#N/A	#N/A
NA	NA	NA	NA	NA	NA	NA	#N/A	#N/A
NA	NA	NA	NA	NA	NA	NA	#N/A	#N/A
NA	NA	NA	NA	NA	NA	NA	#N/A	#N/A
NA	NA	NA	NA	NA	NA	NA	#N/A	#N/A
NA	NA	NA	NA	NA	NA	NA	#N/A	#N/A
NA	NA	NA	NA	NA	NA	NA	#N/A	#N/A
NA	NA	NA	NA	NA	NA	NA	#N/A	#N/A
NA	NA	NA	NA	NA	NA	NA	#N/A	#N/A
NA	NA	NA	NA	NA	NA	NA	#N/A	#N/A
NA	NA	NA	NA	NA	NA	NA	#N/A	#N/A
NA	NA	NA	NA	NA	NA	NA	#N/A	#N/A
NA	NA	NA	NA	NA	NA	NA	#N/A	#N/A
NA	NA	NA	NA	NA	NA	NA	#N/A	#N/A
NA	NA	NA	NA	NA	NA	NA	#N/A	#N/A
NA	NA	NA	NA	NA	NA	NA	#N/A	#N/A
NA	NA	NA	NA	NA	NA	NA	#N/A	#N/A
NA	NA	NA	NA	NA	NA	NA	#N/A	#N/A
NA	NA	NA	NA	NA	NA	NA	#N/A	#N/A
NA	NA	NA	NA	NA	NA	NA	#N/A	#N/A
NA	NA	NA	NA	NA	NA	NA	#N/A	#N/A
NA	NA	NA	NA	NA	NA	NA	#N/A	#N/A
NA	NA	NA	NA	NA	NA	NA	#N/A	#N/A
NA	NA	NA	NA	NA	NA	NA	#N/A	#N/A
NA	NA	NA	NA	NA	NA	NA	#N/A	#N/A
NA	NA	NA	NA	NA	NA	NA	#N/A	#N/A
NA	NA	NA	NA	NA	NA	NA	#N/A	#N/A
NA	NA	NA	NA	NA	NA	NA	#N/A	#N/A
NA	NA	NA	NA	NA	NA	NA	#N/A	#N/A
NA	NA	NA	NA	NA	NA	NA	#N/A	#N/A
NA	NA	NA	NA	NA	NA	NA	#N/A	#N/A
NA	NA	NA	NA	NA	NA	NA	#N/A	#N/A
NA	NA	NA	NA	NA	NA	NA	#N/A	#N/A
NA	NA	NA	NA	NA	NA	NA	#N/A	#N/A
NA	NA	NA	NA	NA	NA	NA	#N/A	#N/A
NA	NA	NA	NA	NA	NA	NA	#N/A	#N/A
NA	NA	NA	NA	NA	NA	NA	#N/A	#N/A
NA	NA	NA	NA	NA	NA	NA	#N/A	#N/A
NA	NA	NA	NA	NA	NA	NA	#N/A	#N/A
NA	NA	NA	NA	NA	NA	NA	#N/A	#N/A
NA	NA	NA	NA	NA	NA	NA	#N/A	#N/A
NA	NA	NA	NA	NA	NA	NA	#N/A	#N/A
NA	NA	NA	NA	NA	NA	NA	#N/A	#N/A
NA	NA	NA	NA	NA	NA	NA	#N/A	#N/A
NA	NA	NA	NA	NA	NA	NA	#N/A	#N/A
NA	NA	NA	NA	NA	NA	NA	#N/A	#N/A
NA	NA	NA	NA	NA	NA	NA	#N/A	#N/A
NA	NA	NA	NA	NA	NA	NA	#N/A	#N/A
NA	NA	NA	NA	NA	NA	NA	#N/A	#N/A
NA	NA	NA	NA	NA	NA	NA	#N/A	#N/A
NA	NA	NA	NA	NA	NA	NA	#N/A	#N/A
NA	NA	NA	NA	NA	NA	NA	#N/A	#N/A
NA	NA	NA	NA	NA	NA	NA	#N/A	#N/A
NA	NA	NA	NA	NA	NA	NA	#N/A	#N/A
NA	NA	NA	NA	NA	NA	NA	#N/A	#N/A
NA	NA	NA	NA	NA	NA	NA	#N/A	#N/A
NA	NA	NA	NA	NA	NA	NA	#N/A	#N/A
NA	NA	NA	NA	NA	NA	NA	#N/A	#N/A
NA	NA	NA	NA	NA	NA	NA	#N/A	#N/A
NA	NA	NA	NA	NA	NA	NA	#N/A	#N/A
NA	NA	NA	NA	NA	NA	NA	#N/A	#N/A
NA	NA	NA	NA	NA	NA	NA	#N/A	#N/A
NA	NA	NA	NA	NA	NA	NA	#N/A	#N/A
NA	NA	NA	NA	NA	NA	NA	#N/A	#N/A
NA	NA	NA	NA	NA	NA	NA	#N/A	#N/A
NA	NA	NA	NA	NA	NA	NA	#N/A	#N/A
NA	NA	NA	NA	NA	NA	NA	#N/A	#N/A
NA	NA	NA	NA	NA	NA	NA	#N/A	#N/A
NA	NA	NA	NA	NA	NA	NA	#N/A	#N/A
NA	NA	NA	NA	NA	NA	NA	#N/A	#N/A
NA	NA	NA	NA	NA	NA	NA	#N/A	#N/A
NA	NA	NA	NA	NA	NA	NA	#N/A	#N/A
NA	NA	NA	NA	NA	NA	NA	#N/A	#N/A
NA	NA	NA	NA	NA	NA	NA	#N/A	#N/A
NA	NA	NA	NA	NA	NA	NA	#N/A	#N/A
NA	NA	NA	NA	NA	NA	NA	#N/A	#N/A
NA	NA	NA	NA	NA	NA	NA	#N/A	#N/A
NA	NA	NA	NA	NA	NA	NA	#N/A	#N/A
NA	NA	NA	NA	NA	NA	NA	#N/A	#N/A
NA	NA	NA	NA	NA	NA	NA	#N/A	#N/A
NA	NA	NA	NA	NA	NA	NA	#N/A	#N/A
NA	NA	NA	NA	NA	NA	NA	#N/A	#N/A
NA	NA	NA	NA	NA	NA	NA	#N/A	#N/A
NA	NA	NA	NA	NA	NA	NA	#N/A	#N/A
NA	NA	NA	NA	NA	NA	NA	#N/A	#N/A
NA	NA	NA	NA	NA	NA	NA	#N/A	#N/A
NA	NA	NA	NA	NA	NA	NA	#N/A	#N/A
NA	NA	NA	NA	NA	NA	NA	#N/A	#N/A
NA	NA	NA	NA	NA	NA	NA	#N/A	#N/A
NA	NA	NA	NA	NA	NA	NA	#N/A	#N/A
NA	NA	NA	NA	NA	NA	NA	#N/A	#N/A
NA	NA	NA	NA	NA	NA	NA	#N/A	#N/A
NA	NA	NA	NA	NA	NA	NA	#N/A	#N/A
NA	NA	NA	NA	NA	NA	NA	#N/A	#N/A
NA	NA	NA	NA	NA	NA	NA	#N/A	#N/A
NA	NA	NA	NA	NA	NA	NA	#N/A	#N/A
NA	NA	NA	NA	NA	NA	NA	#N/A	#N/A
NA	NA	NA	NA	NA	NA	NA	#N/A	#N/A
NA	NA	NA	NA	NA	NA	NA	#N/A	#N/A
NA	NA	NA	NA	NA	NA	NA	#N/A	#N/A
NA	NA	NA	NA	NA	NA	NA	#N/A	#N/A
NA	NA	NA	NA	NA	NA	NA	#N/A	#N/A
NA	NA	NA	NA	NA	NA	NA	#N/A	#N/A
NA	NA	NA	NA	NA	NA	NA	#N/A	#N/A
NA	NA	NA	NA	NA	NA	NA	#N/A	#N/A
NA	NA	NA	NA	NA	NA	NA	#N/A	#N/A
NA	NA	NA	NA	NA	NA	NA	#N/A	#N/A
NA	NA	NA	NA	NA	NA	NA	#N/A	#N/A
NA	NA	NA	NA	NA	NA	NA	#N/A	#N/A
NA	NA	NA	NA	NA	NA	NA	#N/A	#N/A
NA	NA	NA	NA	NA	NA	NA	#N/A	#N/A
NA	NA	NA	NA	NA	NA	NA	#N/A	#N/A
NA	NA	NA	NA	NA	NA	NA	#N/A	#N/A
NA	NA	NA	NA	NA	NA	NA	#N/A	#N/A
NA	NA	NA	NA	NA	NA	NA	#N/A	#N/A
NA	NA	NA	NA	NA	NA	NA	#N/A	#N/A
NA	NA	NA	NA	NA	NA	NA	#N/A	#N/A
NA	NA	NA	NA	NA	NA	NA	#N/A	#N/A
NA	NA	NA	NA	NA	NA	NA	#N/A	#N/A
NA	NA	NA	NA	NA	NA	NA	#N/A	#N/A
NA	NA	NA	NA	NA	NA	NA	#N/A	#N/A
NA	NA	NA	NA	NA	NA	NA	#N/A	#N/A
NA	NA	NA	NA	NA	NA	NA	#N/A	#N/A
NA	NA	NA	NA	NA	NA	NA	#N/A	#N/A
NA	NA	NA	NA	NA	NA	NA	#N/A	#N/A
NA	NA	NA	NA	NA	NA	NA	#N/A	#N/A
NA	NA	NA	NA	NA	NA	NA	#N/A	#N/A
NA	NA	NA	NA	NA	NA	NA	#N/A	#N/A
NA	NA	NA	NA	NA	NA	NA	#N/A	#N/A
NA	NA	NA	NA	NA	NA	NA	#N/A	#N/A
NA	NA	NA	NA	NA	NA	NA	#N/A	#N/A
NA	NA	NA	NA	NA	NA	NA	#N/A	#N/A
NA	NA	NA	NA	NA	NA	NA	#N/A	#N/A
NA	NA	NA	NA	NA	NA	NA	#N/A	#N/A
NA	NA	NA	NA	NA	NA	NA	#N/A	#N/A
NA	NA	NA	NA	NA	NA	NA	#N/A	#N/A
NA	NA	NA	NA	NA	NA	NA	#N/A	#N/A
NA	NA	NA	NA	NA	NA	NA	#N/A	#N/A
NA	NA	NA	NA	NA	NA	NA	#N/A	#N/A
NA	NA	NA	NA	NA	NA	NA	#N/A	#N/A
NA	NA	NA	NA	NA	NA	NA	#N/A	#N/A
NA	NA	NA	NA	NA	NA	NA	#N/A	#N/A
NA	NA	NA	NA	NA	NA	NA	#N/A	#N/A
NA	NA	NA	NA	NA	NA	NA	#N/A	#N/A
NA	NA	NA	NA	NA	NA	NA	#N/A	#N/A
NA	NA	NA	NA	NA	NA	NA	#N/A	#N/A
NA	NA	NA	NA	NA	NA	NA	#N/A	#N/A
NA	NA	NA	NA	NA	NA	NA	#N/A	#N/A
NA	NA	NA	NA	NA	NA	NA	#N/A	#N/A
NA	NA	NA	NA	NA	NA	NA	#N/A	#N/A
NA	NA	NA	NA	NA	NA	NA	#N/A	#N/A
NA	NA	NA	NA	NA	NA	NA	#N/A	#N/A
NA	NA	NA	NA	NA	NA	NA	#N/A	#N/A
NA	NA	NA	NA	NA	NA	NA	#N/A	#N/A
NA	NA	NA	NA	NA	NA	NA	#N/A	#N/A

## Sheet: Table S1c
Table S1c. DPA analysis of transcriptional reponse of E. coli to FNR inactivation: genes that, under anaerobic conditions are up-regulated in FNR- strain compared to FNR+ strain (and thereby repressed by FNR in the wild-type)
	gene.index	RP/Rsum	FC:(class1/class2)	pfp	P.value	log(ratio)		FullName	KEGGID	COMMENT
co2[c]	529	2	0.2853	0.5765	0.0007	-1.80945	co2	CO2	C00011	carbon dioxide
co2[e]	530	2	0.2853	0.5765	0.0007	-1.80945	co2	CO2	C00011	carbon dioxide
co2[p]	531	2	0.2853	0.5765	0.0007	-1.80945	co2	CO2	C00011	carbon dioxide
eca4und[p]	699	4	0.293	0.673	0.0016	-1.77103	eca4und	(enterobacterial common antigen)x4 undecaprenyl-diphosphate	0	peptidoglycan synthesis
all6p[c]	386	9.5	0.2949	0.7631	0.0043	-1.7617	all6p	D-Allose 6-phosphate	C02962	sugar metabolism
gal[c]	815	9.5	0.2949	0.7631	0.0043	-1.7617	gal	D-Galactose	C00124	sugar metabolism
gal1p[c]	810	9.5	0.2949	0.7631	0.0043	-1.7617	gal1p	alpha-D-Galactose 1-phosphate	C00446	sugar metabolism
allul6p[c]	394	9.5	0.2949	0.7631	0.0043	-1.7617	allul6p	Allulose 6-phosphate	0	sugar metabolism
g6p[c]	806	9.5	0.2949	0.7631	0.0043	-1.7617	g6p	D-Glucose 6-phosphate	C00092	sugar metabolism
g1p[c]	787	9.5	0.2949	0.7631	0.0043	-1.7617	g1p	D-Glucose 1-phosphate	C00103	sugar metabolism
glc-D[e]	861	9.5	0.2949	0.7631	0.0043	-1.7617	glc-D	D-Glucose	C00031	sugar metabolism
bglycogen[c]	463	9.5	0.2949	0.7631	0.0043	-1.7617	bglycogen	branching glycogen	0	carbohydrate metabolism
glycogen[c]	911	9.5	0.2949	0.7631	0.0043	-1.7617	glycogen	glycogen	C00182	carbohydrate metabolism
12ppd-R[c]	16	25.5	0.2969	0.8697	0.0133	-1.75195	12ppd-R	(R)-Propane-1,2-diol	C02912	Pyruvate metabolism
12ppd-R[e]	17	25.5	0.2969	0.8697	0.0133	-1.75195	12ppd-R	(R)-Propane-1,2-diol	C02912	Pyruvate metabolism
12ppd-R[p]	18	25.5	0.2969	0.8697	0.0133	-1.75195	12ppd-R	(R)-Propane-1,2-diol	C02912	Pyruvate metabolism
glc-D[p]	862	25.5	0.2969	0.8697	0.0133	-1.75195	glc-D	D-Glucose	C00031	sugar metabolism
2ddg6p[c]	119	25.5	0.2969	0.8697	0.0133	-1.75195	2ddg6p	2-Dehydro-3-deoxy-D-gluconate 6-phosphate	C04442	Pentose phosphate pathway
f6p[c]	716	25.5	0.2969	0.8697	0.0133	-1.75195	f6p	D-Fructose 6-phosphate	C00085	Pentose and glucuronate interconversions
dhap[c]	630	25.5	0.2969	0.8697	0.0133	-1.75195	dhap	Dihydroxyacetone phosphate	C00111	Glycolysis / Gluconeogenesis
g3p[c]	790	25.5	0.2969	0.8697	0.0133	-1.75195	g3p	Glyceraldehyde 3-phosphate	C00661	Glycolysis / Gluconeogenesis
gam1p[c]	833	25.5	0.2969	0.8697	0.0133	-1.75195	gam1p	D-Glucosamine 1-phosphate	C06156	Amino sugar and nucleotide sugar metabolism
gam6p[c]	834	25.5	0.2969	0.8697	0.0133	-1.75195	gam6p	D-Glucosamine 6-phosphate	C00352	Amino sugar and nucleotide sugar metabolism
glc-D[c]	860	25.5	0.2969	0.8697	0.0133	-1.75195	glc-D	D-Glucose	C00031	sugar metabolism
fru[c]	771	25.5	0.2969	0.8697	0.0133	-1.75195	fru	D-Fructose	C00095	sugar metabolism
6pgl[c]	276	25.5	0.2969	0.8697	0.0133	-1.75195	6pgl	6-phospho-D-glucono-1,5-lactone	C01236	Pentose phosphate pathway
13dpg[c]	22	25.5	0.2969	0.8697	0.0133	-1.75195	13dpg	3-Phospho-D-glyceroyl phosphate	C00236	Glycolysis / Gluconeogenesis
6pgc[c]	275	25.5	0.2969	0.8697	0.0133	-1.75195	6pgc	6-Phospho-D-gluconate	C00345	Pentose phosphate pathway
fdp[c]	726	25.5	0.2969	0.8697	0.0133	-1.75195	fdp	D-Fructose 1,6-bisphosphate	C00354	Glycolysis / Gluconeogenesis
fum[c]	784	37.5	0.3041	0.9389	0.0211	-1.71738	fum	Fumarate	C00122	TCA cycle
dha[e]	628	48.5	0.3061	0.9867	0.0287	-1.70793	dha	Dihydroxyacetone	C00184	Glycolysis / Gluconeogenesis
dha[p]	629	48.5	0.3061	0.9867	0.0287	-1.70793	dha	Dihydroxyacetone	C00184	Glycolysis / Gluconeogenesis
glcn[c]	863	48.5	0.3061	0.9867	0.0287	-1.70793	glcn	D-Gluconate	C00257	Pentose phosphate pathway
cbp[c]	487	48.5	0.3061	0.9867	0.0287	-1.70793	cbp	Carbamoyl phosphate	C00169	Purine/pyrimidine metabolism
dha[c]	627	48.5	0.3061	0.9867	0.0287	-1.70793	dha	Dihydroxyacetone	C00184	Glycolysis / Gluconeogenesis
fe2[e]	728	48.5	0.3061	0.9867	0.0287	-1.70793	fe2	Fe2+	C00023	iron
fe2[p]	729	48.5	0.3061	0.9867	0.0287	-1.70793	fe2	Fe2+	C00023	iron
fe3[c]	730	48.5	0.3061	0.9867	0.0287	-1.70793	fe3	Fe3+	0	iron
eca3und[p]	696	48.5	0.3061	0.9867	0.0287	-1.70793	eca3und	(enterobacterial common antigen)x3 undecaprenyl-diphosphate	0	peptidoglycan synthesis
fe2[c]	727	48.5	0.3061	0.9867	0.0287	-1.70793	fe2	Fe2+	C00023	iron
glcn[e]	864	60.5	0.3154	1.0138	0.0368	-1.66475	glcn	D-Gluconate	C00257	Pentose phosphate pathway
glcn[p]	865	60.5	0.3154	1.0138	0.0368	-1.66475	glcn	D-Gluconate	C00257	Pentose phosphate pathway
h[e]	953	75	0.3156	1.053	0.0473	-1.66383	h	H+	C00080	hydrogen ion
gmhep17bp[c]	913	75	0.3156	1.053	0.0473	-1.66383	gmhep17bp	D-Glycero-D-manno-heptose 1,7-bisphosphate	C11472	Lipopolysaccharide biosynthesis
gmhep1p[c]	914	75	0.3156	1.053	0.0473	-1.66383	gmhep1p	D-Glycero-D-manno-heptose 1-phosphate	C07838	Lipopolysaccharide biosynthesis
h[p]	954	75	0.3156	1.053	0.0473	-1.66383	h	H+	C00080	hydrogen ion
ara5p[c]	425	75	0.3156	1.053	0.0473	-1.66383	ara5p	D-Arabinose 5-phosphate	C01112	Lipopolysaccharide biosynthesis
fum[e]	785	75	0.3156	1.053	0.0473	-1.66383	fum	Fumarate	C00122	TCA cycle
fum[p]	786	75	0.3156	1.053	0.0473	-1.66383	fum	Fumarate	C00122	TCA cycle
hco3[c]	957	75	0.3156	1.053	0.0473	-1.66383	hco3	Bicarbonate	C00288	CO2 uptake
e4p[c]	694	75	0.3156	1.053	0.0473	-1.66383	e4p	D-Erythrose 4-phosphate	C00279	Pentose phosphate pathway
for[c]	765	75	0.3156	1.053	0.0473	-1.66383	for	Formate	C00058	TCA cycle
for[e]	766	75	0.3156	1.053	0.0473	-1.66383	for	Formate	C00058	TCA cycle
for[p]	767	75	0.3156	1.053	0.0473	-1.66383	for	Formate	C00058	TCA cycle
gmhep7p[c]	915	75	0.3156	1.053	0.0473	-1.66383	gmhep7p	D-Glycero-D-manno-heptose 7-phosphate	C07836	Lipopolysaccharide biosynthesis
2dda7p[c]	116	96	0.3251	1.1281	0.0649	-1.62104	2dda7p	2-Dehydro-3-deoxy-D-arabino-heptonate 7-phosphate	C04691	Lipopolysaccharide biosynthesis
hemeO[c]	968	96	0.3251	1.1281	0.0649	-1.62104	hemeO	Heme O	0	heme synthesis
acetol[c]	305	96	0.3251	1.1281	0.0649	-1.62104	acetol	Acetol	C05235	Glycine, serine and threonine metabolism
glyc3p[c]	899	96	0.3251	1.1281	0.0649	-1.62104	glyc3p	Glycerol 3-phosphate	C00093	Glycerolipid metabolism
2mcacn[c]	140	96	0.3251	1.1281	0.0649	-1.62104	2mcacn	cis-2-Methylaconitate	C04225	Propanoate metabolism
2mcit[c]	141	96	0.3251	1.1281	0.0649	-1.62104	2mcit	2-Methylcitrate	C02225	Propanoate metabolism
3dhsk[c]	177	96	0.3251	1.1281	0.0649	-1.62104	3dhsk	3-Dehydroshikimate	C02637	Phenylalanine, tyrosine and tryptophan biosynthesis
4per[c]	253	96	0.3251	1.1281	0.0649	-1.62104	4per	4-Phospho-D-erythronate	C03393	Vitamin B6 metabolism
3dhq[c]	176	96	0.3251	1.1281	0.0649	-1.62104	3dhq	3-Dehydroquinate	C00944	Phenylalanine, tyrosine and tryptophan biosynthesis
glx[c]	887	106	0.3305	1.1375	0.0723	-1.59728	glx	Glyoxylate	C00048	Glyoxylate and dicarboxylate metabolism
db4p[c]	597	107	0.3321	1.1344	0.0728	-1.59031	db4p	3,4-dihydroxy-2-butanone 4-phosphate	0	Riboflavin biosynthesis
2mecdp[c]	143	121	0.3349	1.1675	0.0847	-1.5782	2mecdp	2-C-methyl-D-erythritol 2,4-cyclodiphosphate	C11453	isoprenoid biosynthesis
h2s[p]	951	121	0.3349	1.1675	0.0847	-1.5782	h2s	Hydrogen sulfide	C00283	anaerobic respiration
N1aspmd[c]	287	121	0.3349	1.1675	0.0847	-1.5782	N1aspmd	N1-Acetylspermidine	C00612	oxidoreductase cofactor
h2mb4p[c]	942	121	0.3349	1.1675	0.0847	-1.5782	h2mb4p	1-hydroxy-2-methyl-2-(E)-butenyl 4-diphosphate	C11811	isoprenoid biosynthesis
hpyr[c]	990	121	0.3349	1.1675	0.0847	-1.5782	hpyr	Hydroxypyruvate	C00168	Glycine, serine and threonine metabolism, Glyoxylate and dicarboxylate metabolism
h2s[e]	950	121	0.3349	1.1675	0.0847	-1.5782	h2s	Hydrogen sulfide	C00283	anaerobic respiration
hmfurn[c]	984	121	0.3349	1.1675	0.0847	-1.5782	hmfurn	4-hydroxy-5-methyl-3(2H)-furanone	0	sugar metabolism
2dh3dgal6p[c]	123	121	0.3349	1.1675	0.0847	-1.5782	2dh3dgal6p	2-Dehydro-3-deoxy-D-galactonate 6-phosphate	C01286	Galactose metabolism
dhptd[c]	640	121	0.3349	1.1675	0.0847	-1.5782	dhptd	4,5-dihydroxy-2,3-pentanedione	C11838	Cysteine and methionine metabolism
dmpp[c]	652	121	0.3349	1.1675	0.0847	-1.5782	dmpp	Dimethylallyl diphosphate	C00235	Biosynthesis of secondary metabolites
h2s[c]	949	121	0.3349	1.1675	0.0847	-1.5782	h2s	Hydrogen sulfide	C00283	anaerobic respiration
frdp[c]	770	121	0.3349	1.1675	0.0847	-1.5782	frdp	Farnesyl diphosphate	C00448	Steroid biosynthesis
grdp[c]	920	121	0.3349	1.1675	0.0847	-1.5782	grdp	Geranyl diphosphate	C00341	Steroid biosynthesis
2h3oppan[c]	132	121	0.3349	1.1675	0.0847	-1.5782	2h3oppan	2-Hydroxy-3-oxopropanoate	C01146	Glyoxylate and dicarboxylate metabolism
glyc[c]	905	121	0.3349	1.1675	0.0847	-1.5782	glyc	Glycerol	C00116	Glycerolipid metabolism
dxyl5p[c]	692	148.5	0.3403	1.2197	0.1086	-1.55512	dxyl5p	1-deoxy-D-xylulose 5-phosphate	C11437
glyc-R[p]	904	148.5	0.3403	1.2197	0.1086	-1.55512	glyc-R	(R)-Glycerate	C00258
2dr5p[c]	131	148.5	0.3403	1.2197	0.1086	-1.55512	2dr5p	2-Deoxy-D-ribose 5-phosphate	C00673
alac-S[c]	384	148.5	0.3403	1.2197	0.1086	-1.55512	alac-S	(S)-2-Acetolactate	C06010
2dr1p[c]	130	148.5	0.3403	1.2197	0.1086	-1.55512	2dr1p	2-Deoxy-D-ribose 1-phosphate	C00672
glyc3p[e]	900	148.5	0.3403	1.2197	0.1086	-1.55512	glyc3p	Glycerol 3-phosphate	C00093
glyc3p[p]	901	148.5	0.3403	1.2197	0.1086	-1.55512	glyc3p	Glycerol 3-phosphate	C00093
glyc-R[e]	903	148.5	0.3403	1.2197	0.1086	-1.55512	glyc-R	(R)-Glycerate	C00258
gar[c]	839	148.5	0.3403	1.2197	0.1086	-1.55512	gar	N1-(5-Phospho-D-ribosyl)glycinamide	C03838
g3pg[c]	797	148.5	0.3403	1.2197	0.1086	-1.55512	g3pg	Glycerophosphoglycerol	C03274
g3pg[e]	798	148.5	0.3403	1.2197	0.1086	-1.55512	g3pg	Glycerophosphoglycerol	C03274
g3pg[p]	799	148.5	0.3403	1.2197	0.1086	-1.55512	g3pg	Glycerophosphoglycerol	C03274
fgam[c]	759	148.5	0.3403	1.2197	0.1086	-1.55512	fgam	N2-Formyl-N1-(5-phospho-D-ribosyl)glycinamide	C04376
glyclt[c]	908	148.5	0.3403	1.2197	0.1086	-1.55512	glyclt	Glycolate	C00160
glyclt[e]	909	148.5	0.3403	1.2197	0.1086	-1.55512	glyclt	Glycolate	C00160
23dhmb[c]	74	148.5	0.3403	1.2197	0.1086	-1.55512	23dhmb	(R)-2,3-Dihydroxy-3-methylbutanoate	C04272
eca2und[p]	695	148.5	0.3403	1.2197	0.1086	-1.55512	eca2und	(enterobacterial common antigen)x2 undecaprenyl-diphosphate	0
fpram[c]	768	148.5	0.3403	1.2197	0.1086	-1.55512	fpram	2-(Formamido)-N1-(5-phospho-D-ribosyl)acetamidine	C04640
glyclt[p]	910	148.5	0.3403	1.2197	0.1086	-1.55512	glyclt	Glycolate	C00160
glyc-R[c]	902	148.5	0.3403	1.2197	0.1086	-1.55512	glyc-R	(R)-Glycerate	C00258
3mob[c]	207	148.5	0.3403	1.2197	0.1086	-1.55512	3mob	3-Methyl-2-oxobutanoate	C00141
glyc[e]	906	148.5	0.3403	1.2197	0.1086	-1.55512	glyc	Glycerol	C00116
glyc[p]	907	148.5	0.3403	1.2197	0.1086	-1.55512	glyc	Glycerol	C00116
cbasp[c]	480	172	0.3457	1.2567	0.1296	-1.53241	cbasp	N-Carbamoyl-L-aspartate	C00438
4pasp[c]	252	172	0.3457	1.2567	0.1296	-1.53241	4pasp	4-Phospho-L-aspartate	C03082
3psme[c]	230	172	0.3457	1.2567	0.1296	-1.53241	3psme	5-O-(1-Carboxyvinyl)-3-phosphoshikimate	C01269
air[c]	368	172	0.3457	1.2567	0.1296	-1.53241	air	5-amino-1-(5-phospho-D-ribosyl)imidazole	C03373
asn-L[p]	447	172	0.3457	1.2567	0.1296	-1.53241	asn-L	L-Asparagine	C00152
asp-L[e]	454	172	0.3457	1.2567	0.1296	-1.53241	asp-L	L-Aspartate	C00049
asp-L[p]	455	172	0.3457	1.2567	0.1296	-1.53241	asp-L	L-Aspartate	C00049
3pg[c]	228	172	0.3457	1.2567	0.1296	-1.53241	3pg	3-Phospho-D-glycerate	C00197
asn-L[c]	445	172	0.3457	1.2567	0.1296	-1.53241	asn-L	L-Asparagine	C00152
asn-L[e]	446	172	0.3457	1.2567	0.1296	-1.53241	asn-L	L-Asparagine	C00152
2pg[c]	156	172	0.3457	1.2567	0.1296	-1.53241	2pg	D-Glycerate 2-phosphate	C00631
glyald[c]	891	182	0.3487	1.27	0.1386	-1.51994	glyald	D-Glyceraldehyde	C00577
chor[c]	509	201.5	0.3542	1.3056	0.1577	-1.49736	chor	chorismate	C00251
aspsa[c]	456	201.5	0.3542	1.3056	0.1577	-1.49736	aspsa	L-Aspartate 4-semialdehyde	C00441
duri[c]	688	201.5	0.3542	1.3056	0.1577	-1.49736	duri	Deoxyuridine	C00526
dcdp[c]	605	201.5	0.3542	1.3056	0.1577	-1.49736	dcdp	dCDP	C00705
dcmp[c]	606	201.5	0.3542	1.3056	0.1577	-1.49736	dcmp	dCMP	C00239
anhgm[e]	408	201.5	0.3542	1.3056	0.1577	-1.49736	anhgm	N-Acetyl-D-glucosamine(anhydrous)N-Acetylmuramic acid	0
5aizc[c]	257	201.5	0.3542	1.3056	0.1577	-1.49736	5aizc	5-amino-1-(5-phospho-D-ribosyl)imidazole-4-carboxylate	C04751
5caiz[c]	261	201.5	0.3542	1.3056	0.1577	-1.49736	5caiz	5-phosphoribosyl-5-carboxyaminoimidazole	0
dutp[c]	691	201.5	0.3542	1.3056	0.1577	-1.49736	dutp	dUTP	C00460
4ampm[c]	241	201.5	0.3542	1.3056	0.1577	-1.49736	4ampm	4-Amino-2-methyl-5-phosphomethylpyrimidine	C04556
anhgm[p]	409	201.5	0.3542	1.3056	0.1577	-1.49736	anhgm	N-Acetyl-D-glucosamine(anhydrous)N-Acetylmuramic acid	0
hom-L[c]	986	201.5	0.3542	1.3056	0.1577	-1.49736	hom-L	L-Homoserine	C00263
cys-L[p]	581	201.5	0.3542	1.3056	0.1577	-1.49736	cys-L	L-Cysteine	C00097
dcyt[c]	610	201.5	0.3542	1.3056	0.1577	-1.49736	dcyt	Deoxycytidine	C00881
2obut[c]	144	201.5	0.3542	1.3056	0.1577	-1.49736	2obut	2-Oxobutanoate	C00109
4adcho[c]	239	201.5	0.3542	1.3056	0.1577	-1.49736	4adcho	4-amino-4-deoxychorismate	C11355
dhor-S[c]	636	201.5	0.3542	1.3056	0.1577	-1.49736	dhor-S	(S)-Dihydroorotate	C00337
dudp[c]	684	201.5	0.3542	1.3056	0.1577	-1.49736	dudp	dUDP	C01346
dump[c]	685	201.5	0.3542	1.3056	0.1577	-1.49736	dump	dUMP	C00365
hom-L[e]	987	201.5	0.3542	1.3056	0.1577	-1.49736	hom-L	L-Homoserine	C00263
hom-L[p]	988	201.5	0.3542	1.3056	0.1577	-1.49736	hom-L	L-Homoserine	C00263
cys-L[c]	579	201.5	0.3542	1.3056	0.1577	-1.49736	cys-L	L-Cysteine	C00097
cys-L[e]	580	201.5	0.3542	1.3056	0.1577	-1.49736	cys-L	L-Cysteine	C00097
cdp[c]	493	241.5	0.3629	1.3399	0.194	-1.46236	cdp	CDP	C00112
arg-L[c]	437	241.5	0.3629	1.3399	0.194	-1.46236	arg-L	L-Arginine	C00062
csn[c]	557	241.5	0.3629	1.3399	0.194	-1.46236	csn	Cytosine	C00380
ctp[c]	563	241.5	0.3629	1.3399	0.194	-1.46236	ctp	CTP	C00063
cytd[p]	586	241.5	0.3629	1.3399	0.194	-1.46236	cytd	Cytidine	C00475
acanth[c]	303	241.5	0.3629	1.3399	0.194	-1.46236	acanth	N-Acetylanthranilate	C06332
frulysp[c]	777	241.5	0.3629	1.3399	0.194	-1.46236	frulysp	fructoselysine Phosphate	0
agm[c]	362	241.5	0.3629	1.3399	0.194	-1.46236	agm	Agmatine	C00179
cmp[c]	526	241.5	0.3629	1.3399	0.194	-1.46236	cmp	CMP	C00055
glyald[e]	892	241.5	0.3629	1.3399	0.194	-1.46236	glyald	D-Glyceraldehyde	C00577
arg-L[e]	438	241.5	0.3629	1.3399	0.194	-1.46236	arg-L	L-Arginine	C00062
arg-L[p]	439	241.5	0.3629	1.3399	0.194	-1.46236	arg-L	L-Arginine	C00062
cytd[c]	584	241.5	0.3629	1.3399	0.194	-1.46236	cytd	Cytidine	C00475
g3pe[c]	794	241.5	0.3629	1.3399	0.194	-1.46236	g3pe	sn-Glycero-3-phosphoethanolamine	C01233
g3pe[e]	795	241.5	0.3629	1.3399	0.194	-1.46236	g3pe	sn-Glycero-3-phosphoethanolamine	C01233
g3pe[p]	796	241.5	0.3629	1.3399	0.194	-1.46236	g3pe	sn-Glycero-3-phosphoethanolamine	C01233
2mahmp[c]	139	241.5	0.3629	1.3399	0.194	-1.46236	2mahmp	2-Methyl-4-amino-5-hydroxymethylpyrimidine diphosphate	C04752
ckdo[c]	515	241.5	0.3629	1.3399	0.194	-1.46236	ckdo	CMP-3-deoxy-D-manno-octulosonate	0
cytd[e]	585	241.5	0.3629	1.3399	0.194	-1.46236	cytd	Cytidine	C00475
2p4c2me[c]	155	241.5	0.3629	1.3399	0.194	-1.46236	2p4c2me	2-phospho-4-(cytidine 5'-diphospho)-2-C-methyl-D-erythritol	0
dctp[c]	609	241.5	0.3629	1.3399	0.194	-1.46236	dctp	dCTP	C00458
anhgm[c]	407	241.5	0.3629	1.3399	0.194	-1.46236	anhgm	N-Acetyl-D-glucosamine(anhydrous)N-Acetylmuramic acid	0
acmum6p[c]	326	241.5	0.3629	1.3399	0.194	-1.46236	acmum6p	N-acetylmuramate 6-phosphate	0
agm[e]	363	241.5	0.3629	1.3399	0.194	-1.46236	agm	Agmatine	C00179
agm[p]	364	241.5	0.3629	1.3399	0.194	-1.46236	agm	Agmatine	C00179
anhm[c]	412	241.5	0.3629	1.3399	0.194	-1.46236	anhm	1,6-anhydrous-N-Acetylmuramate	0
glyald[p]	893	241.5	0.3629	1.3399	0.194	-1.46236	glyald	D-Glyceraldehyde	C00577
cit[c]	511	278	0.3635	1.3995	0.2332	-1.45997	cit	Citrate	C00158
ggptrc[c]	858	278	0.3635	1.3995	0.2332	-1.45997	ggptrc	gamma-glutamyl-putrescine	0
glu-L[e]	883	278	0.3635	1.3995	0.2332	-1.45997	glu-L	L-Glutamate	C00025
glu-L[c]	882	278	0.3635	1.3995	0.2332	-1.45997	glu-L	L-Glutamate	C00025
acg5sa[c]	307	278	0.3635	1.3995	0.2332	-1.45997	acg5sa	N-Acetyl-L-glutamate 5-semialdehyde	C01250
acald[c]	300	278	0.3635	1.3995	0.2332	-1.45997	acald	Acetaldehyde	C00084
akg[c]	369	278	0.3635	1.3995	0.2332	-1.45997	akg	2-Oxoglutarate	C00026
acon-C[c]	334	278	0.3635	1.3995	0.2332	-1.45997	acon-C	cis-Aconitate	C00417
acald[e]	301	278	0.3635	1.3995	0.2332	-1.45997	acald	Acetaldehyde	C00084
acon-T[c]	335	278	0.3635	1.3995	0.2332	-1.45997	acon-T	trans-Aconitate	C02341
ggbutal[c]	856	278	0.3635	1.3995	0.2332	-1.45997	ggbutal	gamma-glutamyl-gamma-butyraldehyde	0
glu-L[p]	884	278	0.3635	1.3995	0.2332	-1.45997	glu-L	L-Glutamate	C00025
glu-D[c]	881	278	0.3635	1.3995	0.2332	-1.45997	glu-D	D-Glutamate	C00217
glu5sa[c]	880	278	0.3635	1.3995	0.2332	-1.45997	glu5sa	L-Glutamate 5-semialdehyde	C01165
1pyr5c[c]	53	278	0.3635	1.3995	0.2332	-1.45997	1pyr5c	1-Pyrroline-5-carboxylate	C03912
4abutn[c]	237	278	0.3635	1.3995	0.2332	-1.45997	4abutn	4-Aminobutanal	C00555
4abut[c]	234	278	0.3635	1.3995	0.2332	-1.45997	4abut	4-Aminobutanoate	C00334
4abut[e]	235	278	0.3635	1.3995	0.2332	-1.45997	4abut	4-Aminobutanoate	C00334
4abut[p]	236	278	0.3635	1.3995	0.2332	-1.45997	4abut	4-Aminobutanoate	C00334
glu5p[c]	879	278	0.3635	1.3995	0.2332	-1.45997	glu5p	L-Glutamate 5-phosphate	C03287
acald[p]	302	278	0.3635	1.3995	0.2332	-1.45997	acald	Acetaldehyde	C00084
acorn[c]	337	278	0.3635	1.3995	0.2332	-1.45997	acorn	N2-Acetyl-L-ornithine	C00437
acg5p[c]	306	278	0.3635	1.3995	0.2332	-1.45997	acg5p	N-Acetyl-L-glutamyl 5-phosphate	C04133
gln-L[c]	874	278	0.3635	1.3995	0.2332	-1.45997	gln-L	L-Glutamine	C00064
acglu[c]	320	278	0.3635	1.3995	0.2332	-1.45997	acglu	N-Acetyl-L-glutamate	C00624
5drib[c]	266	295.5	0.3724	1.4004	0.2481	-1.42508	5drib	5'-deoxyribose	0
gtspmd[c]	935	295.5	0.3724	1.4004	0.2481	-1.42508	gtspmd	Glutathionylspermidine	C05730
h[c]	952	300	0.3748	1.4134	0.2542	-1.41581	h	H+	C00080
3php[c]	229	300	0.3748	1.4134	0.2542	-1.41581	3php	3-Phosphohydroxypyruvate	C03232
gly[c]	888	300	0.3748	1.4134	0.2542	-1.41581	gly	Glycine	C00037
argsuc[c]	440	317.5	0.3784	1.4171	0.2697	-1.40202	argsuc	N(omega)-(L-Arginino)succinate	C03406
2me4p[c]	142	317.5	0.3784	1.4171	0.2697	-1.40202	2me4p	2-C-methyl-D-erythritol 4-phosphate	C11434
cgly[e]	504	317.5	0.3784	1.4171	0.2697	-1.40202	cgly	Cys-Gly	C01419
citr-L[c]	514	317.5	0.3784	1.4171	0.2697	-1.40202	citr-L	L-Citrulline	C00327
2dmmq8[c]	128	317.5	0.3784	1.4171	0.2697	-1.40202	2dmmq8	2-Demethylmenaquinone 8	C05818
2dmmql8[c]	129	317.5	0.3784	1.4171	0.2697	-1.40202	2dmmql8	2-Demethylmenaquinol 8	0
ala-L[c]	378	317.5	0.3784	1.4171	0.2697	-1.40202	ala-L	L-Alanine	C00041
alaala[c]	381	317.5	0.3784	1.4171	0.2697	-1.40202	alaala	D-Alanyl-D-alanine	C00993
cgly[p]	505	317.5	0.3784	1.4171	0.2697	-1.40202	cgly	Cys-Gly	C01419
4c2me[c]	242	317.5	0.3784	1.4171	0.2697	-1.40202	4c2me	4-(cytidine 5'-diphospho)-2-C-methyl-D-erythritol	C11435
cyst-L[c]	582	317.5	0.3784	1.4171	0.2697	-1.40202	cyst-L	L-Cystathionine	C02291
etha[c]	706	317.5	0.3784	1.4171	0.2697	-1.40202	etha	Ethanolamine	C00189
ala-D[c]	375	317.5	0.3784	1.4171	0.2697	-1.40202	ala-D	D-Alanine	C00133
hxa[c]	993	340.5	0.3853	1.435	0.2929	-1.37595	hxa	Hexanoate (n-C6:0)	C01585
gdp[c]	845	340.5	0.3853	1.435	0.2929	-1.37595	gdp	GDP	C00035
gdpmann[c]	850	351	0.3899	1.4584	0.3069	-1.35882	gdpmann	GDP-D-mannose	C00096
gdpofuc[c]	851	351	0.3899	1.4584	0.3069	-1.35882	gdpofuc	GDP-4-oxo-L-fucose	0
dimp[c]	642	351	0.3899	1.4584	0.3069	-1.35882	dimp	dIMP	C06196
gdptp[c]	852	351	0.3899	1.4584	0.3069	-1.35882	gdptp	Guanosine 3'-diphosphate 5'-triphosphate	C04494
dgsn[c]	623	351	0.3899	1.4584	0.3069	-1.35882	dgsn	Deoxyguanosine	C00330
dgmp[c]	620	351	0.3899	1.4584	0.3069	-1.35882	dgmp	dGMP	C00362
hxa[e]	994	351	0.3899	1.4584	0.3069	-1.35882	hxa	Hexanoate (n-C6:0)	C01585
hxa[p]	995	351	0.3899	1.4584	0.3069	-1.35882	hxa	Hexanoate (n-C6:0)	C01585
gdpddman[c]	848	351	0.3899	1.4584	0.3069	-1.35882	gdpddman	GDP-4-dehydro-6-deoxy-D-mannose	C01222
fprica[c]	769	351	0.3899	1.4584	0.3069	-1.35882	fprica	5-Formamido-1-(5-phospho-D-ribosyl)imidazole-4-carboxamide	C04734
gsn[c]	923	351	0.3899	1.4584	0.3069	-1.35882	gsn	Guanosine	C00387
gtp[c]	932	351	0.3899	1.4584	0.3069	-1.35882	gtp	GTP	C00044
gmp[c]	916	351	0.3899	1.4584	0.3069	-1.35882	gmp	GMP	C00144
adn[p]	348	395.5	0.3946	1.4705	0.3487	-1.34154	adn	Adenosine	C00212
amp[c]	400	395.5	0.3946	1.4705	0.3487	-1.34154	amp	AMP	C00020
camp[c]	479	395.5	0.3946	1.4705	0.3487	-1.34154	camp	cAMP	C00575
dadp[c]	591	395.5	0.3946	1.4705	0.3487	-1.34154	dadp	dADP	C00206
dgdp[c]	619	395.5	0.3946	1.4705	0.3487	-1.34154	dgdp	dGDP	C00361
etha[p]	708	395.5	0.3946	1.4705	0.3487	-1.34154	etha	Ethanolamine	C00189
2oph[c]	154	395.5	0.3946	1.4705	0.3487	-1.34154	2oph	2-Octaprenylphenol	C05810
4r5au[c]	256	395.5	0.3946	1.4705	0.3487	-1.34154	4r5au	4-(1-D-Ribitylamino)-5-aminouracil	C04732
aicar[c]	367	395.5	0.3946	1.4705	0.3487	-1.34154	aicar	5-Amino-1-(5-Phospho-D-ribosyl)imidazole-4-carboxamide	C04677
dad-2[c]	587	395.5	0.3946	1.4705	0.3487	-1.34154	dad-2	Deoxyadenosine	C00559
adn[c]	346	395.5	0.3946	1.4705	0.3487	-1.34154	adn	Adenosine	C00212
akg[e]	370	395.5	0.3946	1.4705	0.3487	-1.34154	akg	2-Oxoglutarate	C00026
akg[p]	371	395.5	0.3946	1.4705	0.3487	-1.34154	akg	2-Oxoglutarate	C00026
3ophb[c]	226	395.5	0.3946	1.4705	0.3487	-1.34154	3ophb	3-Octaprenyl-4-hydroxybenzoate	C05809
5aprbu[c]	259	395.5	0.3946	1.4705	0.3487	-1.34154	5aprbu	5-Amino-6-(5'-phosphoribitylamino)uracil	C04454
ala-D[e]	376	395.5	0.3946	1.4705	0.3487	-1.34154	ala-D	D-Alanine	C00133
ala-D[p]	377	395.5	0.3946	1.4705	0.3487	-1.34154	ala-D	D-Alanine	C00133
adp[c]	354	395.5	0.3946	1.4705	0.3487	-1.34154	adp	ADP	C00008
adpglc[c]	355	395.5	0.3946	1.4705	0.3487	-1.34154	adpglc	ADPglucose	C00498
cgly[c]	503	395.5	0.3946	1.4705	0.3487	-1.34154	cgly	Cys-Gly	C01419
dgtp[c]	626	395.5	0.3946	1.4705	0.3487	-1.34154	dgtp	dGTP	C00286
ditp[c]	648	395.5	0.3946	1.4705	0.3487	-1.34154	ditp	dITP	C01345
alaala[p]	383	395.5	0.3946	1.4705	0.3487	-1.34154	alaala	D-Alanyl-D-alanine	C00993
2omph[c]	153	395.5	0.3946	1.4705	0.3487	-1.34154	2omph	2-Octaprenyl-6-methoxyphenol	C05812
didp[c]	641	395.5	0.3946	1.4705	0.3487	-1.34154	didp	dIDP	C01344
dmlz[c]	651	395.5	0.3946	1.4705	0.3487	-1.34154	dmlz	6,7-Dimethyl-8-(1-D-ribityl)lumazine	C04332
dtdp4d6dm[c]	676	395.5	0.3946	1.4705	0.3487	-1.34154	dtdp4d6dm	dTDP-4-dehydro-6-deoxy-L-mannose	C00688
eca4colipa[e]	697	395.5	0.3946	1.4705	0.3487	-1.34154	eca4colipa	(enterobacterial common antigen)x4 core oligosaccharide lipid A	0
eca4colipa[p]	698	395.5	0.3946	1.4705	0.3487	-1.34154	eca4colipa	(enterobacterial common antigen)x4 core oligosaccharide lipid A	0
etha[e]	707	395.5	0.3946	1.4705	0.3487	-1.34154	etha	Ethanolamine	C00189
25aics[c]	77	395.5	0.3946	1.4705	0.3487	-1.34154	25aics	(S)-2-[5-Amino-1-(5-phospho-D-ribosyl)imidazole-4-carboxamido]succinate	C04823
acgam1p[c]	312	395.5	0.3946	1.4705	0.3487	-1.34154	acgam1p	N-Acetyl-D-glucosamine 1-phosphate	C04256
acmanap[c]	325	395.5	0.3946	1.4705	0.3487	-1.34154	acmanap	N-Acetyl-D-mannosamine 6-phosphate	C04257
damp[c]	592	395.5	0.3946	1.4705	0.3487	-1.34154	damp	dAMP	C00360
dtdp4d6dg[c]	675	395.5	0.3946	1.4705	0.3487	-1.34154	dtdp4d6dg	dTDP-4-dehydro-6-deoxy-D-glucose	C00687
dtdp[c]	677	395.5	0.3946	1.4705	0.3487	-1.34154	dtdp	dTDP	C00363
dtdpglu[c]	678	395.5	0.3946	1.4705	0.3487	-1.34154	dtdpglu	dTDPglucose	C00842
2omhmbl[c]	151	395.5	0.3946	1.4705	0.3487	-1.34154	2omhmbl	2-Octaprenyl-3-methyl-5-hydroxy-6-methoxy-1,4-benzoquinol	0
acgam6p[c]	315	395.5	0.3946	1.4705	0.3487	-1.34154	acgam6p	N-Acetyl-D-glucosamine 6-phosphate	C00357
acgam[c]	316	395.5	0.3946	1.4705	0.3487	-1.34154	acgam	N-Acetyl-D-glucosamine	C00140
dtdp4addg[c]	674	395.5	0.3946	1.4705	0.3487	-1.34154	dtdp4addg	dTDP-4-amino-4,6-dideoxy-D-galactose	C04268
dtdprmn[c]	679	395.5	0.3946	1.4705	0.3487	-1.34154	dtdprmn	dTDP-L-rhamnose	C03319
dtmp[c]	680	395.5	0.3946	1.4705	0.3487	-1.34154	dtmp	dTMP	C00364
dttp[c]	683	395.5	0.3946	1.4705	0.3487	-1.34154	dttp	dTTP	C00459
2ohph[c]	149	395.5	0.3946	1.4705	0.3487	-1.34154	2ohph	2-Octaprenyl-6-hydroxyphenol	C05811
datp[c]	596	395.5	0.3946	1.4705	0.3487	-1.34154	datp	dATP	C00131
alaala[e]	382	395.5	0.3946	1.4705	0.3487	-1.34154	alaala	D-Alanyl-D-alanine	C00993
2ombzl[c]	150	395.5	0.3946	1.4705	0.3487	-1.34154	2ombzl	2-Octaprenyl-6-methoxy-1,4-benzoquinol	0
2ommbl[c]	152	395.5	0.3946	1.4705	0.3487	-1.34154	2ommbl	2-Octaprenyl-3-methyl-6-methoxy- 1,4-benzoquinol	0
acglc-D[c]	319	395.5	0.3946	1.4705	0.3487	-1.34154	acglc-D	6-Acetyl-D-glucose	C02655
cpg160[c]	541	431.5	0.3949	1.4887	0.3851	-1.34044	cpg160	cyclopropane phosphatidylglycerol (dihexadec-9,10-cyclo-anoyl, n-C16:0 cyclo)	0
cpg180[c]	542	431.5	0.3949	1.4887	0.3851	-1.34044	cpg180	cyclopropane phosphatidylglycerol (dioctadec-11,12-cyclo-anoyl, n-C18:0 cyclo)	0
2agpg140[p]	101	508.5	0.3953	1.518	0.4628	-1.33898	2agpg140	2-Acyl-sn-glycero-3-phosphoglycerol (n-C14:0)	0
2agpg120[c]	98	508.5	0.3953	1.518	0.4628	-1.33898	2agpg120	2-Acyl-sn-glycero-3-phosphoglycerol (n-C12:0)	0
2agpg141[c]	102	508.5	0.3953	1.518	0.4628	-1.33898	2agpg141	2-Acyl-sn-glycero-3-phosphoglycerol (n-C14:1)	0
2agpg180[c]	108	508.5	0.3953	1.518	0.4628	-1.33898	2agpg180	2-Acyl-sn-glycero-3-phosphoglycerol (n-C18:0)	0
2ddecg3p[p]	118	508.5	0.3953	1.518	0.4628	-1.33898	2ddecg3p	2-dodecanoyl-sn-glycerol 3-phosphate	C03974
gggagicolipa[c]	857	508.5	0.3953	1.518	0.4628	-1.33898	gggagicolipa	glucosyl-glucosyl-galactosyl-glucosyl-inner core oligosaccharide lipid A	0
gicolipa[c]	859	508.5	0.3953	1.518	0.4628	-1.33898	gicolipa	glucosyl-inner core oligosaccharide lipid A	0
2agpg161[c]	106	508.5	0.3953	1.518	0.4628	-1.33898	2agpg161	2-Acyl-sn-glycero-3-phosphoglycerol (n-C16:1)	0
2agpg161[p]	107	508.5	0.3953	1.518	0.4628	-1.33898	2agpg161	2-Acyl-sn-glycero-3-phosphoglycerol (n-C16:1)	0
colipa[c]	536	508.5	0.3953	1.518	0.4628	-1.33898	colipa	core oligosaccharide lipid A	0
colipa[e]	537	508.5	0.3953	1.518	0.4628	-1.33898	colipa	core oligosaccharide lipid A	0
colipa[p]	538	508.5	0.3953	1.518	0.4628	-1.33898	colipa	core oligosaccharide lipid A	0
hdca[c]	959	508.5	0.3953	1.518	0.4628	-1.33898	hdca	Hexadecanoate (n-C16:0)	C00249
hhlipa[c]	973	508.5	0.3953	1.518	0.4628	-1.33898	hhlipa	heptosyl-heptosyl-kdo2-lipidA	0
hlipa[c]	982	508.5	0.3953	1.518	0.4628	-1.33898	hlipa	heptosyl-kdo2-lipidA	0
hdca[p]	961	508.5	0.3953	1.518	0.4628	-1.33898	hdca	Hexadecanoate (n-C16:0)	C00249
hdcea[c]	962	508.5	0.3953	1.518	0.4628	-1.33898	hdcea	Hexadecenoate (n-C16:1)	0
1odec11eg3p[p]	50	508.5	0.3953	1.518	0.4628	-1.33898	1odec11eg3p	1-octadec-11-enoyl-sn-glycerol 3-phosphate	0
gagicolipa[c]	809	508.5	0.3953	1.518	0.4628	-1.33898	gagicolipa	galactosyl-glucosyl-inner core oligosaccharide lipid A	0
2agpg160[c]	104	508.5	0.3953	1.518	0.4628	-1.33898	2agpg160	2-Acyl-sn-glycero-3-phosphoglycerol (n-C16:0)	0
2agpg160[p]	105	508.5	0.3953	1.518	0.4628	-1.33898	2agpg160	2-Acyl-sn-glycero-3-phosphoglycerol (n-C16:0)	0
2ddecg3p[c]	117	508.5	0.3953	1.518	0.4628	-1.33898	2ddecg3p	2-dodecanoyl-sn-glycerol 3-phosphate	C03974
ggagicolipa[c]	855	508.5	0.3953	1.518	0.4628	-1.33898	ggagicolipa	glucosyl-galactosyl-glucosyl-inner core oligosaccharide lipid A	0
2tdecg3p[p]	162	508.5	0.3953	1.518	0.4628	-1.33898	2tdecg3p	2-tetradecanoyl-sn-glycerol 3-phosphate	C03974
apg161[c]	420	508.5	0.3953	1.518	0.4628	-1.33898	apg161	acyl phosphatidylglycerol (n-C16:1)	0
apg180[c]	421	508.5	0.3953	1.518	0.4628	-1.33898	apg180	acyl phosphatidylglycerol (n-C18:0)	0
apg181[c]	422	508.5	0.3953	1.518	0.4628	-1.33898	apg181	acyl phosphatidylglycerol (n-C18:1)	0
12dgr120[c]	2	508.5	0.3953	1.518	0.4628	-1.33898	12dgr120	1,2-Diacyl-sn-glycerol (didodecanoyl, n-C12:0)	C00641
12dgr120[p]	3	508.5	0.3953	1.518	0.4628	-1.33898	12dgr120	1,2-Diacyl-sn-glycerol (didodecanoyl, n-C12:0)	C00641
12dgr140[c]	4	508.5	0.3953	1.518	0.4628	-1.33898	12dgr140	1,2-Diacyl-sn-glycerol (ditetradecanoyl, n-C14:0)	C00641
12dgr140[p]	5	508.5	0.3953	1.518	0.4628	-1.33898	12dgr140	1,2-Diacyl-sn-glycerol (ditetradecanoyl, n-C14:0)	C00641
12dgr141[c]	6	508.5	0.3953	1.518	0.4628	-1.33898	12dgr141	1,2-Diacyl-sn-glycerol (ditetradec-7-enoyl, n-C14:1)	C00641
12dgr141[p]	7	508.5	0.3953	1.518	0.4628	-1.33898	12dgr141	1,2-Diacyl-sn-glycerol (ditetradec-7-enoyl, n-C14:1)	C00641
12dgr160[c]	8	508.5	0.3953	1.518	0.4628	-1.33898	12dgr160	1,2-Diacyl-sn-glycerol (dihexadecanoyl, n-C16:0)	C00641
12dgr160[p]	9	508.5	0.3953	1.518	0.4628	-1.33898	12dgr160	1,2-Diacyl-sn-glycerol (dihexadecanoyl, n-C16:0)	C00641
12dgr161[c]	10	508.5	0.3953	1.518	0.4628	-1.33898	12dgr161	1,2-Diacyl-sn-glycerol (dihexadec-9-enoyl, n-C16:1)	C00641
12dgr161[p]	11	508.5	0.3953	1.518	0.4628	-1.33898	12dgr161	1,2-Diacyl-sn-glycerol (dihexadec-9-enoyl, n-C16:1)	C00641
12dgr180[c]	12	508.5	0.3953	1.518	0.4628	-1.33898	12dgr180	1,2-Diacyl-sn-glycerol (dioctadecanoyl, n-C18:0)	C00641
12dgr180[p]	13	508.5	0.3953	1.518	0.4628	-1.33898	12dgr180	1,2-Diacyl-sn-glycerol (dioctadecanoyl, n-C18:0)	C00641
12dgr181[c]	14	508.5	0.3953	1.518	0.4628	-1.33898	12dgr181	1,2-Diacyl-sn-glycerol (dioctadec-11-enoyl, n-C18:1)	C00641
12dgr181[p]	15	508.5	0.3953	1.518	0.4628	-1.33898	12dgr181	1,2-Diacyl-sn-glycerol (dioctadec-11-enoyl, n-C18:1)	C00641
1agpg120[p]	36	508.5	0.3953	1.518	0.4628	-1.33898	1agpg120	1-Acyl-sn-glycero-3-phosphoglycerol (n-C12:0)	0
1agpg140[p]	37	508.5	0.3953	1.518	0.4628	-1.33898	1agpg140	1-Acyl-sn-glycero-3-phosphoglycerol (n-C14:0)	0
1agpg141[p]	38	508.5	0.3953	1.518	0.4628	-1.33898	1agpg141	1-Acyl-sn-glycero-3-phosphoglycerol (n-C14:1)	0
1agpg160[p]	39	508.5	0.3953	1.518	0.4628	-1.33898	1agpg160	1-Acyl-sn-glycero-3-phosphoglycerol (n-C16:0)	0
1agpg161[p]	40	508.5	0.3953	1.518	0.4628	-1.33898	1agpg161	1-Acyl-sn-glycero-3-phosphoglycerol (n-C16:1)	0
1agpg180[p]	41	508.5	0.3953	1.518	0.4628	-1.33898	1agpg180	1-Acyl-sn-glycero-3-phosphoglycerol (n-C18:0)	0
1agpg181[p]	42	508.5	0.3953	1.518	0.4628	-1.33898	1agpg181	1-Acyl-sn-glycero-3-phosphoglycerol (n-C18:1)	0
1ddecg3p[c]	43	508.5	0.3953	1.518	0.4628	-1.33898	1ddecg3p	1-dodecanoyl-sn-glycerol 3-phosphate	C00681
1ddecg3p[p]	44	508.5	0.3953	1.518	0.4628	-1.33898	1ddecg3p	1-dodecanoyl-sn-glycerol 3-phosphate	C00681
1hdec9eg3p[c]	45	508.5	0.3953	1.518	0.4628	-1.33898	1hdec9eg3p	1-hexadec-9-enoyl-sn-glycerol 3-phosphate	0
1hdec9eg3p[p]	46	508.5	0.3953	1.518	0.4628	-1.33898	1hdec9eg3p	1-hexadec-9-enoyl-sn-glycerol 3-phosphate	0
1hdecg3p[c]	47	508.5	0.3953	1.518	0.4628	-1.33898	1hdecg3p	1-hexadecanoyl-sn-glycerol 3-phosphate	C00681
1hdecg3p[p]	48	508.5	0.3953	1.518	0.4628	-1.33898	1hdecg3p	1-hexadecanoyl-sn-glycerol 3-phosphate	C00681
1odec11eg3p[c]	49	508.5	0.3953	1.518	0.4628	-1.33898	1odec11eg3p	1-octadec-11-enoyl-sn-glycerol 3-phosphate	0
1odecg3p[c]	51	508.5	0.3953	1.518	0.4628	-1.33898	1odecg3p	1-octadecanoyl-sn-glycerol 3-phosphate	C00681
1odecg3p[p]	52	508.5	0.3953	1.518	0.4628	-1.33898	1odecg3p	1-octadecanoyl-sn-glycerol 3-phosphate	C00681
1tdec7eg3p[c]	54	508.5	0.3953	1.518	0.4628	-1.33898	1tdec7eg3p	1-tetradec-7-enoyl-sn-glycerol 3-phosphate	C00681
2agpg120[p]	99	508.5	0.3953	1.518	0.4628	-1.33898	2agpg120	2-Acyl-sn-glycero-3-phosphoglycerol (n-C12:0)	0
2agpg140[c]	100	508.5	0.3953	1.518	0.4628	-1.33898	2agpg140	2-Acyl-sn-glycero-3-phosphoglycerol (n-C14:0)	0
2agpg180[p]	109	508.5	0.3953	1.518	0.4628	-1.33898	2agpg180	2-Acyl-sn-glycero-3-phosphoglycerol (n-C18:0)	0
2agpg181[c]	110	508.5	0.3953	1.518	0.4628	-1.33898	2agpg181	2-Acyl-sn-glycero-3-phosphoglycerol (n-C18:1)	0
2agpg181[p]	111	508.5	0.3953	1.518	0.4628	-1.33898	2agpg181	2-Acyl-sn-glycero-3-phosphoglycerol (n-C18:1)	0
2hdec9eg3p[c]	133	508.5	0.3953	1.518	0.4628	-1.33898	2hdec9eg3p	2-hexadec-9-enoyl-sn-glycerol 3-phosphate	C03974
2hdec9eg3p[p]	134	508.5	0.3953	1.518	0.4628	-1.33898	2hdec9eg3p	2-hexadec-9-enoyl-sn-glycerol 3-phosphate	C03974
2hdecg3p[c]	135	508.5	0.3953	1.518	0.4628	-1.33898	2hdecg3p	2-hexadecanoyl-sn-glycerol 3-phosphate	C03974
2hdecg3p[p]	136	508.5	0.3953	1.518	0.4628	-1.33898	2hdecg3p	2-hexadecanoyl-sn-glycerol 3-phosphate	C03974
1tdec7eg3p[p]	55	508.5	0.3953	1.518	0.4628	-1.33898	1tdec7eg3p	1-tetradec-7-enoyl-sn-glycerol 3-phosphate	C00681
1tdecg3p[c]	56	508.5	0.3953	1.518	0.4628	-1.33898	1tdecg3p	1-tetradecanoyl-sn-glycerol 3-phosphate	C00681
ddca[c]	615	508.5	0.3953	1.518	0.4628	-1.33898	ddca	Dodecanoate (n-C12:0)	C02679
ddca[p]	617	508.5	0.3953	1.518	0.4628	-1.33898	ddca	Dodecanoate (n-C12:0)	C02679
2agpg141[p]	103	508.5	0.3953	1.518	0.4628	-1.33898	2agpg141	2-Acyl-sn-glycero-3-phosphoglycerol (n-C14:1)	0
apg120[c]	416	508.5	0.3953	1.518	0.4628	-1.33898	apg120	acyl phosphatidylglycerol (n-C12:0)	0
apg141[c]	418	508.5	0.3953	1.518	0.4628	-1.33898	apg141	acyl phosphatidylglycerol (n-C14:1)	0
2odecg3p[c]	147	508.5	0.3953	1.518	0.4628	-1.33898	2odecg3p	2-octadecanoyl-sn-glycerol 3-phosphate	C03974
apg140[c]	417	508.5	0.3953	1.518	0.4628	-1.33898	apg140	acyl phosphatidylglycerol (n-C14:0)	0
apg160[c]	419	508.5	0.3953	1.518	0.4628	-1.33898	apg160	acyl phosphatidylglycerol (n-C16:0)	0
hdcea[p]	964	508.5	0.3953	1.518	0.4628	-1.33898	hdcea	Hexadecenoate (n-C16:1)	0
hphhlipa[c]	989	508.5	0.3953	1.518	0.4628	-1.33898	hphhlipa	heptosyl-phospho-heptosyl-heptosyl-kdo2-lipidA	0
2odec11eg3p[c]	145	508.5	0.3953	1.518	0.4628	-1.33898	2odec11eg3p	2-octadec-11-enoyl-sn-glycerol 3-phosphate	C03974
2tdec7eg3p[p]	160	508.5	0.3953	1.518	0.4628	-1.33898	2tdec7eg3p	2-tetradec-7-enoyl-sn-glycerol 3-phosphate	C03974
dca[c]	600	508.5	0.3953	1.518	0.4628	-1.33898	dca	Decanoate (n-C10:0)	C01571
1tdecg3p[p]	57	508.5	0.3953	1.518	0.4628	-1.33898	1tdecg3p	1-tetradecanoyl-sn-glycerol 3-phosphate	C00681
2odec11eg3p[p]	146	508.5	0.3953	1.518	0.4628	-1.33898	2odec11eg3p	2-octadec-11-enoyl-sn-glycerol 3-phosphate	C03974
2odecg3p[p]	148	508.5	0.3953	1.518	0.4628	-1.33898	2odecg3p	2-octadecanoyl-sn-glycerol 3-phosphate	C03974
2tdec7eg3p[c]	159	508.5	0.3953	1.518	0.4628	-1.33898	2tdec7eg3p	2-tetradec-7-enoyl-sn-glycerol 3-phosphate	C03974
2tdecg3p[c]	161	508.5	0.3953	1.518	0.4628	-1.33898	2tdecg3p	2-tetradecanoyl-sn-glycerol 3-phosphate	C03974
adn[e]	347	595	0.3972	1.5237	0.5435	-1.33206	adn	Adenosine	C00212
atp[c]	459	595	0.3972	1.5237	0.5435	-1.33206	atp	ATP	C00002
dcamp[c]	604	595	0.3972	1.5237	0.5435	-1.33206	dcamp	N6-(1,2-Dicarboxyethyl)-AMP	C03794
hisp[c]	977	595	0.3972	1.5237	0.5435	-1.33206	hisp	L-Histidinol phosphate	C01100
histd[c]	978	595	0.3972	1.5237	0.5435	-1.33206	histd	L-Histidinol	C00860
ahdt[c]	366	595	0.3972	1.5237	0.5435	-1.33206	ahdt	2-Amino-4-hydroxy-6-(erythro-1,2,3-trihydroxypropyl)dihydropteridine triphosphate	C04895
gdpfuc[c]	849	595	0.3972	1.5237	0.5435	-1.33206	gdpfuc	GDP-L-fucose	C00325
aps[c]	424	595	0.3972	1.5237	0.5435	-1.33206	aps	Adenosine 5'-phosphosulfate	C00224
adphep-DD[c]	356	595	0.3972	1.5237	0.5435	-1.33206	adphep-DD	ADP-D-glycero-D-manno-heptose	C06397
adphep-LD[c]	357	595	0.3972	1.5237	0.5435	-1.33206	adphep-LD	ADP-L-glycero-D-manno-heptose	C06398
25drapp[c]	79	595	0.3972	1.5237	0.5435	-1.33206	25drapp	2,5-Diamino-6-(ribosylamino)-4-(3H)-pyrimidinone 5'-phosphate	0
5apru[c]	260	595	0.3972	1.5237	0.5435	-1.33206	5apru	5-Amino-6-(5'-phosphoribosylamino)uracil	C01268
dhmptp[c]	633	595	0.3972	1.5237	0.5435	-1.33206	dhmptp	dihydromonapterin-triphosphate	0
dhnpt[c]	635	619.5	0.3998	1.5264	0.5669	-1.32265	dhnpt	Dihydroneopterin	C04874
2cpr5p[c]	115	619.5	0.3998	1.5264	0.5669	-1.32265	2cpr5p	1-(2-Carboxyphenylamino)-1-deoxy-D-ribulose 5-phosphate	C01302
3ig3p[c]	206	619.5	0.3998	1.5264	0.5669	-1.32265	3ig3p	C'-(3-Indolyl)-glycerol 3-phosphate	C03506
fad[c]	719	619.5	0.3998	1.5264	0.5669	-1.32265	fad	Flavin adenine dinucleotide oxidized	C00016
fadh2[c]	720	619.5	0.3998	1.5264	0.5669	-1.32265	fadh2	Flavin adenine dinucleotide reduced	C01352
h2o[e]	947	619.5	0.3998	1.5264	0.5669	-1.32265	h2o	H2O	C00001
din[c]	645	619.5	0.3998	1.5264	0.5669	-1.32265	din	Deoxyinosine	C05512
h2o[p]	948	619.5	0.3998	1.5264	0.5669	-1.32265	h2o	H2O	C00001
h2o[c]	946	619.5	0.3998	1.5264	0.5669	-1.32265	h2o	H2O	C00001
eig3p[c]	700	619.5	0.3998	1.5264	0.5669	-1.32265	eig3p	D-erythro-1-(Imidazol-4-yl)glycerol 3-phosphate	C04666
23ddhb[c]	69	619.5	0.3998	1.5264	0.5669	-1.32265	23ddhb	2,3-Dihydro-2,3-dihydroxybenzoate	C04171
23dhb[c]	70	619.5	0.3998	1.5264	0.5669	-1.32265	23dhb	2,3-Dihydroxybenzoate	C00196
LalaLglu[c]	286	619.5	0.3998	1.5264	0.5669	-1.32265	LalaLglu	L-alanine-L-glutamate	0
fmn[c]	763	619.5	0.3998	1.5264	0.5669	-1.32265	fmn	FMN	C00061
fmnh2[c]	764	619.5	0.3998	1.5264	0.5669	-1.32265	fmnh2	Reduced FMN	0
LalaDglu[c]	285	619.5	0.3998	1.5264	0.5669	-1.32265	LalaDglu	L-alanine-D-glutamate	0
4abz[c]	238	619.5	0.3998	1.5264	0.5669	-1.32265	4abz	4-Aminobenzoate	C00568
dhpmp[c]	637	619.5	0.3998	1.5264	0.5669	-1.32265	dhpmp	Dihydroneopterin monophosphate	C05925
dscl[c]	671	648	0.4005	1.5269	0.5932	-1.32013	dscl	dihydrosirohydrochlorin	C02463
2aobut[c]	114	648	0.4005	1.5269	0.5932	-1.32013	2aobut	L-2-Amino-3-oxobutanoate	C03508
4mop[c]	250	648	0.4005	1.5269	0.5932	-1.32013	4mop	4-Methyl-2-oxopentanoate	C00233
hmbil[c]	983	648	0.4005	1.5269	0.5932	-1.32013	hmbil	Hydroxymethylbilane	C01024
3c2hmp[c]	169	648	0.4005	1.5269	0.5932	-1.32013	3c2hmp	3-Carboxy-2-hydroxy-4-methylpentanoate	C04411
3c3hmp[c]	170	648	0.4005	1.5269	0.5932	-1.32013	3c3hmp	3-Carboxy-3-hydroxy-4-methylpentanoate	C02504
gthox[c]	926	648	0.4005	1.5269	0.5932	-1.32013	gthox	Oxidized glutathione	C00127
gg4abut[c]	854	648	0.4005	1.5269	0.5932	-1.32013	gg4abut	gamma-glutamyl-gamma aminobutyric acid	0
2dhp[c]	127	648	0.4005	1.5269	0.5932	-1.32013	2dhp	2-Dehydropantoate	C00966
5aop[c]	258	648	0.4005	1.5269	0.5932	-1.32013	5aop	5-Amino-4-oxopentanoate	C00430
aact[c]	292	648	0.4005	1.5269	0.5932	-1.32013	aact	Aminoacetone	C01888
ac[c]	294	648	0.4005	1.5269	0.5932	-1.32013	ac	Acetate	C00033
ac[e]	295	648	0.4005	1.5269	0.5932	-1.32013	ac	Acetate	C00033
gthrd[c]	929	648	0.4005	1.5269	0.5932	-1.32013	gthrd	Reduced glutathione	C00051
ac[p]	296	648	0.4005	1.5269	0.5932	-1.32013	ac	Acetate	C00033
3c4mop[c]	171	648	0.4005	1.5269	0.5932	-1.32013	3c4mop	3-Carboxy-4-methyl-2-oxopentanoate	C04236
cpppg3[c]	549	648	0.4005	1.5269	0.5932	-1.32013	cpppg3	Coproporphyrinogen III	C03263
actp[c]	342	648	0.4005	1.5269	0.5932	-1.32013	actp	Acetyl phosphate	C00227
glu1sa[c]	878	648	0.4005	1.5269	0.5932	-1.32013	glu1sa	L-Glutamate 1-semialdehyde	C03741
2ippm[c]	137	648	0.4005	1.5269	0.5932	-1.32013	2ippm	2-Isopropylmaleate	C02631
dnad[c]	659	648	0.4005	1.5269	0.5932	-1.32013	dnad	Deamino-NAD+	C00857
clpn161[p]	523	666	0.4008	1.5156	0.6051	-1.31905	clpn161	cardiolipin (tetrahexadec-9-enoyl, n-C16:1)	C05980
clpn181[p]	525	666	0.4008	1.5156	0.6051	-1.31905	clpn181	cardiolipin (tetraoctadec-11-enoyl, n-C18:1)	C05980
clpn120[p]	519	666	0.4008	1.5156	0.6051	-1.31905	clpn120	cardiolipin (tetradodecanoyl, n-C12:0)	C05980
clpn140[p]	520	666	0.4008	1.5156	0.6051	-1.31905	clpn140	cardiolipin (tetratetradecanoyl, n-C14:0)	C05980
clpn141[p]	521	666	0.4008	1.5156	0.6051	-1.31905	clpn141	cardiolipin (tetratetradec-7-enoyl, n-C14:1)	C05980
clpn180[p]	524	666	0.4008	1.5156	0.6051	-1.31905	clpn180	cardiolipin (tetraoctadecanoyl, n-C18:0)	C05980
clpn160[p]	522	666	0.4008	1.5156	0.6051	-1.31905	clpn160	cardiolipin (tetrahexadecanoyl, n-C16:0)	C05980
6hmhptpp[c]	274	670.5	0.4023	1.5108	0.6073	-1.31366	6hmhptpp	6-hydroxymethyl-dihydropterin pyrophosphate	0
6hmhpt[c]	273	670.5	0.4023	1.5108	0.6073	-1.31366	6hmhpt	6-hydroxymethyl dihydropterin	0
4hbz[c]	245	672.5	0.4031	1.5089	0.6083	-1.31079	4hbz	4-Hydroxybenzoate	C00156
anth[c]	413	672.5	0.4031	1.5089	0.6083	-1.31079	anth	Anthranilate	C00108
athr-L[c]	458	700	0.4064	1.5215	0.6385	-1.29903	athr-L	L-Allo-threonine	C05519
gthrd[p]	931	700	0.4064	1.5215	0.6385	-1.29903	gthrd	Reduced glutathione	C00051
acolipa[p]	333	700	0.4064	1.5215	0.6385	-1.29903	acolipa	4-Amino-4-deoxy-L-arabinose modified core oligosaccharide lipid A	0
4mpetz[c]	251	700	0.4064	1.5215	0.6385	-1.29903	4mpetz	4-Methyl-5-(2-phosphoethyl)-thiazole	C04327
aconm[c]	336	700	0.4064	1.5215	0.6385	-1.29903	aconm	E-3-carboxy-2-pentenedioate 6-methyl ester	0
acolipa[e]	332	700	0.4064	1.5215	0.6385	-1.29903	acolipa	4-Amino-4-deoxy-L-arabinose modified core oligosaccharide lipid A	0
glucys[c]	885	700	0.4064	1.5215	0.6385	-1.29903	glucys	gamma-L-Glutamyl-L-cysteine	C00669
adprib[c]	358	700	0.4064	1.5215	0.6385	-1.29903	adprib	ADPribose	C00301
26dap-LL[c]	80	700	0.4064	1.5215	0.6385	-1.29903	26dap-LL	LL-2,6-Diaminoheptanedioate	C00666
26dap-M[c]	81	700	0.4064	1.5215	0.6385	-1.29903	26dap-M	meso-2,6-Diaminoheptanedioate	C00680
2ahbut[c]	112	700	0.4064	1.5215	0.6385	-1.29903	2ahbut	(S)-2-Aceto-2-hydroxybutanoate	C06006
fe3[e]	731	700	0.4064	1.5215	0.6385	-1.29903	fe3	Fe3+	0
gthrd[e]	930	700	0.4064	1.5215	0.6385	-1.29903	gthrd	Reduced glutathione	C00051
3mop[c]	208	700	0.4064	1.5215	0.6385	-1.29903	3mop	(S)-3-Methyl-2-oxopentanoate	C00671
acser[e]	339	700	0.4064	1.5215	0.6385	-1.29903	acser	O-Acetyl-L-serine	C00979
acser[p]	340	700	0.4064	1.5215	0.6385	-1.29903	acser	O-Acetyl-L-serine	C00979
10fthf[c]	1	700	0.4064	1.5215	0.6385	-1.29903	10fthf	10-Formyltetrahydrofolate	C00234
etoh[c]	712	700	0.4064	1.5215	0.6385	-1.29903	etoh	Ethanol	C00469
fe3[p]	732	700	0.4064	1.5215	0.6385	-1.29903	fe3	Fe3+	0
etoh[e]	713	700	0.4064	1.5215	0.6385	-1.29903	etoh	Ethanol	C00469
etoh[p]	714	700	0.4064	1.5215	0.6385	-1.29903	etoh	Ethanol	C00469
15dap[c]	26	700	0.4064	1.5215	0.6385	-1.29903	15dap	1,5-Diaminopentane	C01672
15dap[e]	27	700	0.4064	1.5215	0.6385	-1.29903	15dap	1,5-Diaminopentane	C01672
15dap[p]	28	700	0.4064	1.5215	0.6385	-1.29903	15dap	1,5-Diaminopentane	C01672
23dhdp[c]	73	700	0.4064	1.5215	0.6385	-1.29903	23dhdp	2,3-Dihydrodipicolinate	C03340
23dhmp[c]	75	700	0.4064	1.5215	0.6385	-1.29903	23dhmp	(R)-2,3-Dihydroxy-3-methylpentanoate	C06007
LalaDgluMdapDala[e]	280	700	0.4064	1.5215	0.6385	-1.29903	LalaDgluMdapDala	L-alanine-D-glutamate-meso-2,6-diaminoheptanedioate-D-alanine	0
LalaDgluMdapDala[p]	281	700	0.4064	1.5215	0.6385	-1.29903	LalaDgluMdapDala	L-alanine-D-glutamate-meso-2,6-diaminoheptanedioate-D-alanine	0
LalaDgluMdapDala[c]	279	700	0.4064	1.5215	0.6385	-1.29903	LalaDgluMdapDala	L-alanine-D-glutamate-meso-2,6-diaminoheptanedioate-D-alanine	0
5mthf[c]	270	700	0.4064	1.5215	0.6385	-1.29903	5mthf	5-Methyltetrahydrofolate	C00440
acser[c]	338	700	0.4064	1.5215	0.6385	-1.29903	acser	O-Acetyl-L-serine	C00979
dhf[c]	632	700	0.4064	1.5215	0.6385	-1.29903	dhf	7,8-Dihydrofolate	C00415
cpe180[c]	540	742	0.4153	1.5078	0.6708	-1.26777	cpe180	cyclopropane phosphatidylethanolamine (dioctadec-11,12-cyclo-anoyl, n-C18:0 cyclo)	0
cpe160[c]	539	742	0.4153	1.5078	0.6708	-1.26777	cpe160	cyclopropane phosphatidylethanolamine (dihexadec-9,10-cyclo-anoyl, n-C16:0 cyclo)	0
LalaDgluMdap[e]	283	742	0.4153	1.5078	0.6708	-1.26777	LalaDgluMdap	L-alanine-D-glutamate-meso-2,6-diaminoheptanedioate	0
LalaDgluMdap[p]	284	742	0.4153	1.5078	0.6708	-1.26777	LalaDgluMdap	L-alanine-D-glutamate-meso-2,6-diaminoheptanedioate	0
LalaDgluMdap[c]	282	742	0.4153	1.5078	0.6708	-1.26777	LalaDgluMdap	L-alanine-D-glutamate-meso-2,6-diaminoheptanedioate	0
feenter[c]	750	742	0.4153	1.5078	0.6708	-1.26777	feenter	Fe-enterobactin	C06230
feenter[e]	751	742	0.4153	1.5078	0.6708	-1.26777	feenter	Fe-enterobactin	C06230
feenter[p]	752	742	0.4153	1.5078	0.6708	-1.26777	feenter	Fe-enterobactin	C06230
dhpt[c]	639	742	0.4153	1.5078	0.6708	-1.26777	dhpt	Dihydropteroate	C00921
enlipa[p]	702	742	0.4153	1.5078	0.6708	-1.26777	enlipa	phosphoethanolamine KDO(2)-lipid (A)	0
enter[c]	703	742	0.4153	1.5078	0.6708	-1.26777	enter	Enterochelin	0
enter[e]	704	742	0.4153	1.5078	0.6708	-1.26777	enter	Enterochelin	0
23dhbzs[c]	72	742	0.4153	1.5078	0.6708	-1.26777	23dhbzs	2,3-dihydroxybenzoylserine	0
enlipa[e]	701	742	0.4153	1.5078	0.6708	-1.26777	enlipa	phosphoethanolamine KDO(2)-lipid (A)	0
enter[p]	705	742	0.4153	1.5078	0.6708	-1.26777	enter	Enterochelin	0
2amsa[c]	113	759.5	0.4166	1.5036	0.6846	-1.26327	2amsa	2-Aminomalonate semialdehyde	C11822
cdpdddecg[c]	494	798.5	0.4244	1.4958	0.7161	-1.2365	cdpdddecg	CDP-1,2-didodecanoylglycerol	C00269
b2coa[c]	460	798.5	0.4244	1.4958	0.7161	-1.2365	b2coa	Crotonoyl-CoA	C00877
dtdp4aaddg[c]	673	798.5	0.4244	1.4958	0.7161	-1.2365	dtdp4aaddg	dTDP-4-acetamido-4,6-dideoxy-D-galactose	0
3ohcoa[c]	217	798.5	0.4244	1.4958	0.7161	-1.2365	3ohcoa	3-Oxohexanoyl-CoA	C05269
cdpdhdec9eg[c]	495	798.5	0.4244	1.4958	0.7161	-1.2365	cdpdhdec9eg	CDP-1,2-dihexadec-9-enoylglycerol	C00269
coa[c]	532	798.5	0.4244	1.4958	0.7161	-1.2365	coa	Coenzyme A	C00010
anhgm4p[c]	405	798.5	0.4244	1.4958	0.7161	-1.2365	anhgm4p	N-Acetyl-D-glucosamine(anhydrous)N-Acetylmuramyl-tetrapeptide	0
hcys-L[c]	958	798.5	0.4244	1.4958	0.7161	-1.2365	hcys-L	L-Homocysteine	C00155
cdpdhdecg[c]	496	798.5	0.4244	1.4958	0.7161	-1.2365	cdpdhdecg	CDP-1,2-dihexadecanoylglycerol	C00269
cdpdodec11eg[c]	497	798.5	0.4244	1.4958	0.7161	-1.2365	cdpdodec11eg	CDP-1,2-dioctadec-11-enoylglycerol	C00269
cdpdtdec7eg[c]	499	798.5	0.4244	1.4958	0.7161	-1.2365	cdpdtdec7eg	CDP-1,2-ditetradec-7-enoylglycerol	C00269
cdpdtdecg[c]	500	798.5	0.4244	1.4958	0.7161	-1.2365	cdpdtdecg	CDP-1,2-ditetradecanoylglycerol	C00269
hx2coa[c]	992	798.5	0.4244	1.4958	0.7161	-1.2365	hx2coa	trans-Hex-2-enoyl-CoA	C05271
1agpe161[p]	33	798.5	0.4244	1.4958	0.7161	-1.2365	1agpe161	1-Acyl-sn-glycero-3-phosphoethanolamine (n-C16:1)	C04438
1agpe180[p]	34	798.5	0.4244	1.4958	0.7161	-1.2365	1agpe180	1-Acyl-sn-glycero-3-phosphoethanolamine (n-C18:0)	C04438
1agpe181[p]	35	798.5	0.4244	1.4958	0.7161	-1.2365	1agpe181	1-Acyl-sn-glycero-3-phosphoethanolamine (n-C18:1)	C04438
2agpe120[c]	84	798.5	0.4244	1.4958	0.7161	-1.2365	2agpe120	2-Acyl-sn-glycero-3-phosphoethanolamine (n-C12:0)	C05973
2agpe120[p]	85	798.5	0.4244	1.4958	0.7161	-1.2365	2agpe120	2-Acyl-sn-glycero-3-phosphoethanolamine (n-C12:0)	C05973
2agpe140[c]	86	798.5	0.4244	1.4958	0.7161	-1.2365	2agpe140	2-Acyl-sn-glycero-3-phosphoethanolamine (n-C14:0)	C05973
2agpe140[p]	87	798.5	0.4244	1.4958	0.7161	-1.2365	2agpe140	2-Acyl-sn-glycero-3-phosphoethanolamine (n-C14:0)	C05973
2agpe141[c]	88	798.5	0.4244	1.4958	0.7161	-1.2365	2agpe141	2-Acyl-sn-glycero-3-phosphoethanolamine (n-C14:1)	C05973
2agpe141[p]	89	798.5	0.4244	1.4958	0.7161	-1.2365	2agpe141	2-Acyl-sn-glycero-3-phosphoethanolamine (n-C14:1)	C05973
2agpe160[c]	90	798.5	0.4244	1.4958	0.7161	-1.2365	2agpe160	2-Acyl-sn-glycero-3-phosphoethanolamine (n-C16:0)	C05973
2agpe160[p]	91	798.5	0.4244	1.4958	0.7161	-1.2365	2agpe160	2-Acyl-sn-glycero-3-phosphoethanolamine (n-C16:0)	C05973
2agpe161[c]	92	798.5	0.4244	1.4958	0.7161	-1.2365	2agpe161	2-Acyl-sn-glycero-3-phosphoethanolamine (n-C16:1)	C05973
2agpe161[p]	93	798.5	0.4244	1.4958	0.7161	-1.2365	2agpe161	2-Acyl-sn-glycero-3-phosphoethanolamine (n-C16:1)	C05973
cdpdodecg[c]	498	798.5	0.4244	1.4958	0.7161	-1.2365	cdpdodecg	CDP-1,2-dioctadecanoylglycerol	C00269
2agpe181[p]	97	798.5	0.4244	1.4958	0.7161	-1.2365	2agpe181	2-Acyl-sn-glycero-3-phosphoethanolamine (n-C18:1)	C05973
anhgm4p[p]	406	798.5	0.4244	1.4958	0.7161	-1.2365	anhgm4p	N-Acetyl-D-glucosamine(anhydrous)N-Acetylmuramyl-tetrapeptide	0
anhm4p[c]	411	798.5	0.4244	1.4958	0.7161	-1.2365	anhm4p	1,6-anhydrous-N-Acetylmuramyl-tetrapeptide	0
2agpe181[c]	96	798.5	0.4244	1.4958	0.7161	-1.2365	2agpe181	2-Acyl-sn-glycero-3-phosphoethanolamine (n-C18:1)	C05973
2agpe180[c]	94	798.5	0.4244	1.4958	0.7161	-1.2365	2agpe180	2-Acyl-sn-glycero-3-phosphoethanolamine (n-C18:0)	C05973
3hhcoa[c]	193	798.5	0.4244	1.4958	0.7161	-1.2365	3hhcoa	(S)-3-Hydroxyhexanoyl-CoA	C05268
btcoa[c]	465	798.5	0.4244	1.4958	0.7161	-1.2365	btcoa	Butanoyl-CoA	C00136
2agpe180[p]	95	798.5	0.4244	1.4958	0.7161	-1.2365	2agpe180	2-Acyl-sn-glycero-3-phosphoethanolamine (n-C18:0)	C05973
1agpe120[p]	29	798.5	0.4244	1.4958	0.7161	-1.2365	1agpe120	1-Acyl-sn-glycero-3-phosphoethanolamine (n-C12:0)	C04438
1agpe140[p]	30	798.5	0.4244	1.4958	0.7161	-1.2365	1agpe140	1-Acyl-sn-glycero-3-phosphoethanolamine (n-C14:0)	C04438
1agpe141[p]	31	798.5	0.4244	1.4958	0.7161	-1.2365	1agpe141	1-Acyl-sn-glycero-3-phosphoethanolamine (n-C14:1)	C04438
1agpe160[p]	32	798.5	0.4244	1.4958	0.7161	-1.2365	1agpe160	1-Acyl-sn-glycero-3-phosphoethanolamine (n-C16:0)	C04438
dpcoa[c]	662	798.5	0.4244	1.4958	0.7161	-1.2365	dpcoa	Dephospho-CoA	C00882
3hbcoa[c]	181	798.5	0.4244	1.4958	0.7161	-1.2365	3hbcoa	(S)-3-Hydroxybutanoyl-CoA	C01144
2tpr3dpcoa[c]	163	798.5	0.4244	1.4958	0.7161	-1.2365	2tpr3dpcoa	2'-(5''-triphosphoribosyl)-3'-dephospho-CoA	0
ametam[c]	398	842	0.4257	1.4745	0.7443	-1.23209	ametam	S-Adenosylmethioninamine	C01137
anhm3p[c]	410	842	0.4257	1.4745	0.7443	-1.23209	anhm3p	1,6-anhydrous-N-Acetylmuramyl-tripeptide	0
dad-5[c]	590	842	0.4257	1.4745	0.7443	-1.23209	dad-5	5'-Deoxyadenosine	C05198
anhgm3p[p]	404	842	0.4257	1.4745	0.7443	-1.23209	anhgm3p	N-Acetyl-D-glucosamine(anhydrous)N-Acetylmuramyl-tripeptide	0
gua[c]	936	842	0.4257	1.4745	0.7443	-1.23209	gua	Guanine	C00242
gua[p]	938	842	0.4257	1.4745	0.7443	-1.23209	gua	Guanine	C00242
anhgm3p[c]	403	842	0.4257	1.4745	0.7443	-1.23209	anhgm3p	N-Acetyl-D-glucosamine(anhydrous)N-Acetylmuramyl-tripeptide	0
ca2[p]	478	890.5	0.427	1.4586	0.7787	-1.22769	ca2	Calcium	C00076
acmalt[c]	321	890.5	0.427	1.4586	0.7787	-1.22769	acmalt	Acetyl-maltose	C02130
amet[c]	397	890.5	0.427	1.4586	0.7787	-1.22769	amet	S-Adenosyl-L-methionine	C00019
cu2[p]	566	890.5	0.427	1.4586	0.7787	-1.22769	cu2	Cu2+	0
cu2[c]	564	890.5	0.427	1.4586	0.7787	-1.22769	cu2	Cu2+	0
cobalt2[c]	533	890.5	0.427	1.4586	0.7787	-1.22769	cobalt2	Co2+	C00175
cobalt2[p]	535	890.5	0.427	1.4586	0.7787	-1.22769	cobalt2	Co2+	C00175
ahcys[c]	365	890.5	0.427	1.4586	0.7787	-1.22769	ahcys	S-Adenosyl-L-homocysteine	C00021
dad-2[e]	588	890.5	0.427	1.4586	0.7787	-1.22769	dad-2	Deoxyadenosine	C00559
dad-2[p]	589	890.5	0.427	1.4586	0.7787	-1.22769	dad-2	Deoxyadenosine	C00559
hkntd[c]	981	890.5	0.427	1.4586	0.7787	-1.22769	hkntd	2-hydroxy-6-ketononatrienedioate	0
cl[c]	516	890.5	0.427	1.4586	0.7787	-1.22769	cl	Chloride	C00115
cl[p]	518	890.5	0.427	1.4586	0.7787	-1.22769	cl	Chloride	C00115
gsn[p]	925	890.5	0.427	1.4586	0.7787	-1.22769	gsn	Guanosine	C00387
5dglcn[p]	264	890.5	0.427	1.4586	0.7787	-1.22769	5dglcn	5-Dehydro-D-gluconate	C01062
duri[p]	690	890.5	0.427	1.4586	0.7787	-1.22769	duri	Deoxyuridine	C00526
5dglcn[c]	262	890.5	0.427	1.4586	0.7787	-1.22769	5dglcn	5-Dehydro-D-gluconate	C01062
5dglcn[e]	263	890.5	0.427	1.4586	0.7787	-1.22769	5dglcn	5-Dehydro-D-gluconate	C01062
alltn[p]	392	890.5	0.427	1.4586	0.7787	-1.22769	alltn	Allantoin	C01551
alltn[c]	390	890.5	0.427	1.4586	0.7787	-1.22769	alltn	Allantoin	C01551
dgsn[p]	625	890.5	0.427	1.4586	0.7787	-1.22769	dgsn	Deoxyguanosine	C00330
din[p]	647	890.5	0.427	1.4586	0.7787	-1.22769	din	Deoxyinosine	C05512
3hpppn[p]	204	890.5	0.427	1.4586	0.7787	-1.22769	3hpppn	3-(3-hydroxy-phenyl)propionate	0
ade[c]	343	890.5	0.427	1.4586	0.7787	-1.22769	ade	Adenine	C00147
ade[e]	344	890.5	0.427	1.4586	0.7787	-1.22769	ade	Adenine	C00147
ade[p]	345	890.5	0.427	1.4586	0.7787	-1.22769	ade	Adenine	C00147
14glucan[c]	23	890.5	0.427	1.4586	0.7787	-1.22769	14glucan	1,4-alpha-D-glucan	0
14glucan[e]	24	890.5	0.427	1.4586	0.7787	-1.22769	14glucan	1,4-alpha-D-glucan	0
14glucan[p]	25	890.5	0.427	1.4586	0.7787	-1.22769	14glucan	1,4-alpha-D-glucan	0
ascb-L[p]	444	890.5	0.427	1.4586	0.7787	-1.22769	ascb-L	L-Ascorbate	C00072
fru[p]	773	890.5	0.427	1.4586	0.7787	-1.22769	fru	D-Fructose	C00095
gua[e]	937	890.5	0.427	1.4586	0.7787	-1.22769	gua	Guanine	C00242
ca2[c]	476	890.5	0.427	1.4586	0.7787	-1.22769	ca2	Calcium	C00076
duri[e]	689	890.5	0.427	1.4586	0.7787	-1.22769	duri	Deoxyuridine	C00526
hxcoa[c]	999	890.5	0.427	1.4586	0.7787	-1.22769	hxcoa	Hexanoyl-CoA (n-C6:0CoA)	C05270
alltn[e]	391	890.5	0.427	1.4586	0.7787	-1.22769	alltn	Allantoin	C01551
3hocoa[c]	197	941.5	0.4311	1.4334	0.8091	-1.21391	3hocoa	(S)-3-Hydroxyoctanoyl-CoA	C05266
asp-L[c]	453	941.5	0.4311	1.4334	0.8091	-1.21391	asp-L	L-Aspartate	C00049
hxan[c]	996	941.5	0.4311	1.4334	0.8091	-1.21391	hxan	Hypoxanthine	C00262
accoa[c]	304	941.5	0.4311	1.4334	0.8091	-1.21391	accoa	Acetyl-CoA	C00024
3odcoa[c]	213	941.5	0.4311	1.4334	0.8091	-1.21391	3odcoa	3-Oxodecanoyl-CoA	C05265
alltt[c]	393	941.5	0.4311	1.4334	0.8091	-1.21391	alltt	Allantoate	C00499
3oocoa[c]	221	941.5	0.4311	1.4334	0.8091	-1.21391	3oocoa	3-Oxooctanoyl-CoA	C05267
2shchc[c]	158	941.5	0.4311	1.4334	0.8091	-1.21391	2shchc	2-Succinyl-6-hydroxy-2,4-cyclohexadiene-1-carboxylate	C05817
3hdcoa[c]	189	941.5	0.4311	1.4334	0.8091	-1.21391	3hdcoa	(S)-3-Hydroxydecanoyl-CoA	C05264
hxan[e]	997	941.5	0.4311	1.4334	0.8091	-1.21391	hxan	Hypoxanthine	C00262
hxan[p]	998	941.5	0.4311	1.4334	0.8091	-1.21391	hxan	Hypoxanthine	C00262
dc2coa[c]	598	941.5	0.4311	1.4334	0.8091	-1.21391	dc2coa	trans-Dec-2-enoyl-CoA	C05275
dhna[c]	634	941.5	0.4311	1.4334	0.8091	-1.21391	dhna	1,4-Dihydroxy-2-naphthoate	C03657
ala-B[c]	372	952.5	0.4353	1.4269	0.8148	-1.19992	ala-B	beta-Alanine	C00099
23dhba[c]	71	952.5	0.4353	1.4269	0.8148	-1.19992	23dhba	(2,3-Dihydroxybenzoyl)adenylate	C04030
h2o2[c]	943	956.5	0.4434	1.4244	0.8168	-1.17332	h2o2	Hydrogen peroxide	C00027
4ppcys[c]	255	961	0.4477	1.4217	0.8191	-1.1594	4ppcys	N-((R)-4-Phosphopantothenoyl)-L-cysteine	C04352
aacoa[c]	291	961	0.4477	1.4217	0.8191	-1.1594	aacoa	Acetoacetyl-CoA	C00332
4ppan[c]	254	961	0.4477	1.4217	0.8191	-1.1594	4ppan	D-4'-Phosphopantothenate	C03492
dcacoa[c]	603	965	0.4605	1.4198	0.8214	-1.11873	dcacoa	Decanoyl-CoA (n-C10:0CoA)	C05274
dd2coa[c]	613	965	0.4605	1.4198	0.8214	-1.11873	dd2coa	trans-Dodec-2-enoyl-CoA	C03221
3hddcoa[c]	190	965	0.4605	1.4198	0.8214	-1.11873	3hddcoa	(S)-3-Hydroxydodecanoyl-CoA	C05262
34hpp[c]	166	969	0.466	1.4175	0.8235	-1.1016	34hpp	3-(4-Hydroxyphenyl)pyruvate	C01179
3oddcoa[c]	214	969	0.466	1.4175	0.8235	-1.1016	3oddcoa	3-Oxododecanoyl-CoA	C05263
hdd2coa[c]	966	982.5	0.4715	1.4098	0.8304	-1.08467	hdd2coa	trans-Hexadec-2-enoyl-CoA	C05272
his-L[c]	974	982.5	0.4715	1.4098	0.8304	-1.08467	his-L	L-Histidine	C00135
3otdcoa[c]	227	982.5	0.4715	1.4098	0.8304	-1.08467	3otdcoa	3-Oxotetradecanoyl-CoA	C05261
3ohdcoa[c]	218	982.5	0.4715	1.4098	0.8304	-1.08467	3ohdcoa	3-Oxohexadecanoyl-CoA	C05259
3oodcoa[c]	224	982.5	0.4715	1.4098	0.8304	-1.08467	3oodcoa	3-Oxooctadecanoyl-CoA	0
4hthr[c]	248	982.5	0.4715	1.4098	0.8304	-1.08467	4hthr	4-Hydroxy-L-threonine	C06056
ddcacoa[c]	618	982.5	0.4715	1.4098	0.8304	-1.08467	ddcacoa	Dodecanoyl-CoA (n-C12:0CoA)	C01832
3htdcoa[c]	205	982.5	0.4715	1.4098	0.8304	-1.08467	3htdcoa	(S)-3-Hydroxytetradecanoyl-CoA	C05260
3hhdcoa[c]	194	982.5	0.4715	1.4098	0.8304	-1.08467	3hhdcoa	(S)-3-Hydroxyhexadecanoyl-CoA	C05258
3hodcoa[c]	200	982.5	0.4715	1.4098	0.8304	-1.08467	3hodcoa	(S)-3-Hydroxyoctadecanoyl-CoA	0
hdcoa[c]	965	982.5	0.4715	1.4098	0.8304	-1.08467	hdcoa	Hexadecenoyl-CoA (n-C16:1CoA)	0
his-L[e]	975	982.5	0.4715	1.4098	0.8304	-1.08467	his-L	L-Histidine	C00135
his-L[p]	976	982.5	0.4715	1.4098	0.8304	-1.08467	his-L	L-Histidine	C00135
cbl1[p]	486	997	0.5937	1.4013	0.8376	-0.752194	cbl1	Cob(I)alamin	C00853
adocbl[c]	351	998	0.6991	1.4008	0.8381	-0.516429	adocbl	Adenosylcobalamin	C00194
cbl1[c]	484	999	0.7961	1.4002	0.8386	-0.328978	cbl1	Cob(I)alamin	C00853
adocbi[c]	349	NA	NA	1.2662	0.8388	#VALUE!	adocbi	Adenosyl cobinamide	C06508
5mta[c]	269	NA	NA	1.3004	0.8388	#VALUE!	5mta	5-Methylthioadenosine	C00170
acgam1p[e]	313	NA	NA	1.2813	0.8388	#VALUE!	acgam1p	N-Acetyl-D-glucosamine 1-phosphate	C04256
cbi[c]	481	NA	NA	1.2041	0.8388	#VALUE!	cbi	Cobinamide	C05774
cd2[e]	489	NA	NA	1.199	0.8388	#VALUE!	cd2	Cadmium	C01413
cddec5eACP[c]	491	NA	NA	1.1969	0.8388	#VALUE!	cddec5eACP	cis-dodec-5-enoyl-[acyl-carrier protein] (n-C12:1)	0
cdec3eACP[c]	492	NA	NA	1.1959	0.8388	#VALUE!	cdec3eACP	cis-dec-3-enoyl-[acyl-carrier protein] (n-C10:1)	0
grxox[c]	921	NA	NA	1.0176	0.8388	#VALUE!	grxox	glutaredoxin (oxidized)	0
12ppd-S[c]	19	NA	NA	1.3992	0.8388	#VALUE!	12ppd-S	(S)-Propane-1,2-diol	C02917
3hmrsACP[c]	196	NA	NA	1.3364	0.8388	#VALUE!	3hmrsACP	(R)-3-Hydroxytetradecanoyl-[acyl-carrier protein]	C04688
butso3[p]	475	NA	NA	1.2062	0.8388	#VALUE!	butso3	butanesulfonate	0
cbi[e]	482	NA	NA	1.2031	0.8388	#VALUE!	cbi	Cobinamide	C05774
chol[p]	508	NA	NA	1.1908	0.8388	#VALUE!	chol	Choline	C00114
cinnm[c]	510	NA	NA	1.1898	0.8388	#VALUE!	cinnm	trans-Cinnamate	C00423
dump[p]	687	NA	NA	1.1131	0.8388	#VALUE!	dump	dUMP	C00365
glcur[p]	873	NA	NA	1.0296	0.8388	#VALUE!	glcur	D-Glucuronate	C00191
grxrd[c]	922	NA	NA	1.0169	0.8388	#VALUE!	grxrd	glutaredoxin (reduced)	0
dms[e]	654	NA	NA	1.1302	0.8388	#VALUE!	dms	Dimethyl sulfide	C00580
amob[c]	399	NA	NA	1.247	0.8388	#VALUE!	amob	S-Adenosyl-4-methylthio-2-oxobutanoate	C04425
asptrna[c]	457	NA	NA	1.2199	0.8388	#VALUE!	asptrna	L-Aspartyl-tRNA(Asp)	C02984
dtbt[c]	672	NA	NA	1.1167	0.8388	#VALUE!	dtbt	Dethiobiotin	C01909
gal[p]	817	NA	NA	1.0568	0.8388	#VALUE!	gal	D-Galactose	C00124
galt1p[c]	827	NA	NA	1.0489	0.8388	#VALUE!	galt1p	Galactitol 1-phosphate	C06311
galur[c]	830	NA	NA	1.0465	0.8388	#VALUE!	galur	D-Galacturonate	C00333
cit[e]	512	NA	NA	1.1888	0.8388	#VALUE!	cit	Citrate	C00158
cit[p]	513	NA	NA	1.1878	0.8388	#VALUE!	cit	Citrate	C00158
acac[c]	297	NA	NA	1.2896	0.8388	#VALUE!	acac	Acetoacetate	C00164
arbtn-fe3[p]	435	NA	NA	1.2306	0.8388	#VALUE!	arbtn-fe3	Aerobactin	C05554
butACP[c]	469	NA	NA	1.2125	0.8388	#VALUE!	butACP	Butyryl-ACP (n-C4:0ACP)	C05745
but[c]	470	NA	NA	1.2114	0.8388	#VALUE!	but	Butyrate (n-C4:0)	C00246
but[e]	471	NA	NA	1.2104	0.8388	#VALUE!	but	Butyrate (n-C4:0)	C00246
cpgn[c]	543	NA	NA	1.1827	0.8388	#VALUE!	cpgn	coprogen	0
cu[c]	567	NA	NA	1.164	0.8388	#VALUE!	cu	Cu+	0
cu[e]	568	NA	NA	1.1631	0.8388	#VALUE!	cu	Cu+	0
galur[e]	831	NA	NA	1.0457	0.8388	#VALUE!	galur	D-Galacturonate	C00333
garagund[c]	840	NA	NA	1.0411	0.8388	#VALUE!	garagund	glucosyl-O-acetyl-rhamanosyl-N-acetylglucosamyl-undecaprenyl diphosphate	0
glcr[p]	868	NA	NA	1.0334	0.8388	#VALUE!	glcr	D-Glucarate	C00818
glcur1p[p]	870	NA	NA	1.0318	0.8388	#VALUE!	glcur1p	D-Glucuronate 1-phosphate	C05385
glcur[c]	871	NA	NA	1.0311	0.8388	#VALUE!	glcur	D-Glucuronate	C00191
glcur[e]	872	NA	NA	1.0303	0.8388	#VALUE!	glcur	D-Glucuronate	C00191
3haACP[c]	180	NA	NA	1.3506	0.8388	#VALUE!	3haACP	(3R)-3-Hydroxyacyl-[acyl-carrier protein]	C01271
cmp[p]	528	NA	NA	1.1847	0.8388	#VALUE!	cmp	CMP	C00055
cys-D[c]	576	NA	NA	1.1554	0.8388	#VALUE!	cys-D	D-Cysteine	C00793
dgmp[e]	621	NA	NA	1.1403	0.8388	#VALUE!	dgmp	dGMP	C00362
dtmp[e]	681	NA	NA	1.1158	0.8388	#VALUE!	dtmp	dTMP	C00364
galctn-D[c]	821	NA	NA	1.0536	0.8388	#VALUE!	galctn-D	D-Galactonate	C00880
galctn-D[e]	822	NA	NA	1.0528	0.8388	#VALUE!	galctn-D	D-Galactonate	C00880
glyb[c]	894	NA	NA	1.0243	0.8388	#VALUE!	glyb	Glycine betaine	C00719
glyb[e]	895	NA	NA	1.0235	0.8388	#VALUE!	glyb	Glycine betaine	C00719
glyb[p]	896	NA	NA	1.0228	0.8388	#VALUE!	glyb	Glycine betaine	C00719
fc1p[c]	724	NA	NA	1.1035	0.8388	#VALUE!	fc1p	L-Fuculose 1-phosphate	C01099
ala-L[e]	379	NA	NA	1.256	0.8388	#VALUE!	ala-L	L-Alanine	C00041
ap5a[c]	415	NA	NA	1.2426	0.8388	#VALUE!	ap5a	P1,P5-Bis(5'-adenosyl) pentaphosphate	C04058
butso3[e]	474	NA	NA	1.2072	0.8388	#VALUE!	butso3	butanesulfonate	0
cobalt2[e]	534	NA	NA	1.1837	0.8388	#VALUE!	cobalt2	Co2+	C00175
cpgn[p]	545	NA	NA	1.1807	0.8388	#VALUE!	cpgn	coprogen	0
ctbtcoa[c]	562	NA	NA	1.166	0.8388	#VALUE!	ctbtcoa	crotonobetainyl-CoA	0
hdeACP[c]	967	NA	NA	1.0059	0.8388	#VALUE!	hdeACP	cis-hexadec-9-enoyl-[acyl-carrier protein] (n-C16:1)	0
histrna[c]	979	NA	NA	1.0023	0.8388	#VALUE!	histrna	L-Histidyl-tRNA(His)	C02988
23ccmp[e]	60	NA	NA	1.3922	0.8388	#VALUE!	23ccmp	2',3'-Cyclic CMP	C02354
5mdru1p[c]	268	NA	NA	1.3016	0.8388	#VALUE!	5mdru1p	5-Methylthio-5-deoxy-D-ribulose 1-phosphate	C04582
arbtn-fe3[e]	434	NA	NA	1.2317	0.8388	#VALUE!	arbtn-fe3	Aerobactin	C05554
arbtn[p]	436	NA	NA	1.2295	0.8388	#VALUE!	arbtn	aerobactin minus Fe3	0
btn[c]	466	NA	NA	1.2156	0.8388	#VALUE!	btn	Biotin	C00120
but[p]	472	NA	NA	1.2093	0.8388	#VALUE!	but	Butyrate (n-C4:0)	C00246
cd2[c]	488	NA	NA	1.2	0.8388	#VALUE!	cd2	Cadmium	C01413
fe3dcit[e]	733	NA	NA	1.1017	0.8388	#VALUE!	fe3dcit	Fe(III)dicitrate	C06229
glutrna[c]	886	NA	NA	1.0266	0.8388	#VALUE!	glutrna	L-Glutamyl-tRNA(Glu)	C02987
hexACP[c]	969	NA	NA	1.0052	0.8388	#VALUE!	hexACP	Hexanoyl-ACP (n-C6:0ACP)	C05749
hg2[c]	970	NA	NA	1.0044	0.8388	#VALUE!	hg2	Hg2+	C00703
34dhpac[e]	164	NA	NA	1.3637	0.8388	#VALUE!	34dhpac	3,4-Dihydroxyphenylacetaldehyde	C04043
3gmp[p]	179	NA	NA	1.3519	0.8388	#VALUE!	3gmp	3'-GMP	C06193
acgal1p[e]	308	NA	NA	1.286	0.8388	#VALUE!	acgal1p	N-Acetyl-D-galactosamine 1-phosphate	0
acgam[p]	318	NA	NA	1.2778	0.8388	#VALUE!	acgam	N-Acetyl-D-glucosamine	C00140
fcl-L[c]	725	NA	NA	1.1026	0.8388	#VALUE!	fcl-L	L-fuculose	C01721
h2[c]	939	NA	NA	1.0124	0.8388	#VALUE!	h2	H2	C00282
h2[e]	940	NA	NA	1.0117	0.8388	#VALUE!	h2	H2	C00282
h2[p]	941	NA	NA	1.011	0.8388	#VALUE!	h2	H2	C00282
halipa[e]	956	NA	NA	1.0081	0.8388	#VALUE!	halipa	hepta-acylated KDO(2)-lipid (A)	0
3cmp[e]	172	NA	NA	1.3584	0.8388	#VALUE!	3cmp	3'-cmp	C05822
3cmp[p]	173	NA	NA	1.3571	0.8388	#VALUE!	3cmp	3'-cmp	C05822
3hcinnm[e]	184	NA	NA	1.3467	0.8388	#VALUE!	3hcinnm	3-hydroxycinnamic acid	0
3hcvac11eACP[c]	188	NA	NA	1.3415	0.8388	#VALUE!	3hcvac11eACP	(R)-3-hydroxy-cis-vacc-11-enoyl-[acyl-carrier protein]	0
acgal1p[p]	309	NA	NA	1.2848	0.8388	#VALUE!	acgal1p	N-Acetyl-D-galactosamine 1-phosphate	0
alatrna[c]	385	NA	NA	1.2538	0.8388	#VALUE!	alatrna	L-Alanyl-tRNA(Ala)	C00886
all-D[c]	387	NA	NA	1.2526	0.8388	#VALUE!	all-D	D-Allose	C01487
arab-L[p]	428	NA	NA	1.2382	0.8388	#VALUE!	arab-L	L-Arabinose	C00259
aragund[c]	429	NA	NA	1.2371	0.8388	#VALUE!	aragund	O-acetyl-rhamanosyl-N-acetylglucosamyl-undecaprenyl diphosphate	0
arbt6p[c]	430	NA	NA	1.236	0.8388	#VALUE!	arbt6p	Arbutin 6-phosphate	C06187
arbtn-fe3[c]	433	NA	NA	1.2328	0.8388	#VALUE!	arbtn-fe3	Aerobactin	C05554
dca[e]	601	NA	NA	1.1478	0.8388	#VALUE!	dca	Decanoate (n-C10:0)	C01571
fe3hox[p]	740	NA	NA	1.0957	0.8388	#VALUE!	fe3hox	Fe(III)hydroxamate	C06227
gal-bD[e]	813	NA	NA	1.0592	0.8388	#VALUE!	gal-bD	beta D-Galactose	C01582
glytrna[c]	912	NA	NA	1.0206	0.8388	#VALUE!	glytrna	Glycyl-tRNA(Gly)	C02412
hdca[e]	960	NA	NA	1.0073	0.8388	#VALUE!	hdca	Hexadecanoate (n-C16:0)	C00249
hg2[p]	972	NA	NA	1.003	0.8388	#VALUE!	hg2	Hg2+	C00703
hkndd[c]	980	NA	NA	1.0016	0.8388	#VALUE!	hkndd	2-Hydroxy-6-oxonona-2,4-diene-1,9-dioate	C04479
3oddecACP[c]	215	NA	NA	1.3237	0.8388	#VALUE!	3oddecACP	3-Oxododecanoyl-[acyl-carrier protein]	C05756
acac[e]	298	NA	NA	1.2884	0.8388	#VALUE!	acac	Acetoacetate	C00164
acac[p]	299	NA	NA	1.2872	0.8388	#VALUE!	acac	Acetoacetate	C00164
acmana[c]	322	NA	NA	1.2766	0.8388	#VALUE!	acmana	N-Acetyl-D-mannosamine	C00645
agdpcbi[c]	361	NA	NA	1.2594	0.8388	#VALUE!	agdpcbi	Adenosine-GDP-cobinamide	C06510
ca2[e]	477	NA	NA	1.2052	0.8388	#VALUE!	ca2	Calcium	C00076
cbi[p]	483	NA	NA	1.2021	0.8388	#VALUE!	cbi	Cobinamide	C05774
cbl1[e]	485	NA	NA	1.201	0.8388	#VALUE!	cbl1	Cob(I)alamin	C00853
cmp[e]	527	NA	NA	1.1858	0.8388	#VALUE!	cmp	CMP	C00055
ethso3[p]	711	NA	NA	1.1096	0.8388	#VALUE!	ethso3	ethanesulfonate	0
galctn-L[p]	826	NA	NA	1.0497	0.8388	#VALUE!	galctn-L	L-Galactonate	0
gly[e]	889	NA	NA	1.0258	0.8388	#VALUE!	gly	Glycine	C00037
h2o2[e]	944	NA	NA	1.0102	0.8388	#VALUE!	h2o2	Hydrogen peroxide	C00027
h2o2[p]	945	NA	NA	1.0095	0.8388	#VALUE!	h2o2	Hydrogen peroxide	C00027
3amp[e]	167	NA	NA	1.3611	0.8388	#VALUE!	3amp	3'-AMP	C01367
3amp[p]	168	NA	NA	1.3598	0.8388	#VALUE!	3amp	3'-AMP	C01367
3ocvac11eACP[c]	212	NA	NA	1.325	0.8388	#VALUE!	3ocvac11eACP	3-oxo-cis-vacc-11-enoyl-[acyl-carrier protein]	0
3ohexACP[c]	219	NA	NA	1.3212	0.8388	#VALUE!	3ohexACP	3-Oxohexanoyl-[acyl-carrier protein]	C05746
3sala[c]	231	NA	NA	1.315	0.8388	#VALUE!	3sala	3-Sulfino-L-alanine	C00606
3ump[p]	233	NA	NA	1.3126	0.8388	#VALUE!	3ump	3'-UMP	C01368
chol[c]	506	NA	NA	1.1928	0.8388	#VALUE!	chol	Choline	C00114
cl[e]	517	NA	NA	1.1868	0.8388	#VALUE!	cl	Chloride	C00115
dca[p]	602	NA	NA	1.1469	0.8388	#VALUE!	dca	Decanoate (n-C10:0)	C01571
gal1p[e]	811	NA	NA	1.0608	0.8388	#VALUE!	gal1p	alpha-D-Galactose 1-phosphate	C00446
galt[e]	828	NA	NA	1.0481	0.8388	#VALUE!	galt	Galactitol	C01697
galur[p]	832	NA	NA	1.0449	0.8388	#VALUE!	galur	D-Galacturonate	C00333
3hdecACP[c]	192	NA	NA	1.3389	0.8388	#VALUE!	3hdecACP	(R)-3-Hydroxydecanoyl-[acyl-carrier protein]	C04619
crn[c]	553	NA	NA	1.1738	0.8388	#VALUE!	crn	L-Carnitine	C00318
34dhpac[p]	165	NA	NA	1.3624	0.8388	#VALUE!	34dhpac	3,4-Dihydroxyphenylacetaldehyde	C04043
cu2[e]	565	NA	NA	1.165	0.8388	#VALUE!	cu2	Cu2+	0
3dhguln[c]	174	NA	NA	1.3558	0.8388	#VALUE!	3dhguln	3-Dehydro-L-gulonate	C00618
5dh4dglc[c]	265	NA	NA	1.304	0.8388	#VALUE!	5dh4dglc	5-Dehydro-4-deoxy-D-glucarate	C00679
acnam[p]	331	NA	NA	1.2685	0.8388	#VALUE!	acnam	N-Acetylneuraminate	C00270
fe3dhbzs[p]	737	NA	NA	1.0983	0.8388	#VALUE!	fe3dhbzs	ferric 2,3-dihydroxybenzoylserine	0
fe3hox[c]	738	NA	NA	1.0974	0.8388	#VALUE!	fe3hox	Fe(III)hydroxamate	C06227
fe3hox[e]	739	NA	NA	1.0965	0.8388	#VALUE!	fe3hox	Fe(III)hydroxamate	C06227
fmettrna[c]	762	NA	NA	1.0805	0.8388	#VALUE!	fmettrna	N-Formylmethionyl-tRNA	C03294
gam[e]	837	NA	NA	1.0426	0.8388	#VALUE!	gam	D-Glucosamine	C00329
gam[p]	838	NA	NA	1.0418	0.8388	#VALUE!	gam	D-Glucosamine	C00329
gsn[e]	924	NA	NA	1.0161	0.8388	#VALUE!	gsn	Guanosine	C00387
gln-L[e]	875	NA	NA	1.0288	0.8388	#VALUE!	gln-L	L-Glutamine	C00064
fe3dhbzs[e]	736	NA	NA	1.0991	0.8388	#VALUE!	fe3dhbzs	ferric 2,3-dihydroxybenzoylserine	0
damp[e]	593	NA	NA	1.1516	0.8388	#VALUE!	damp	dAMP	C00360
butso3[c]	473	NA	NA	1.2083	0.8388	#VALUE!	butso3	butanesulfonate	0
cechddd[c]	501	NA	NA	1.1949	0.8388	#VALUE!	cechddd	cis-3-(3-carboxyethyl)-3,5-cyclohexadiene-1,2-diol	0
cpgn[e]	544	NA	NA	1.1817	0.8388	#VALUE!	cpgn	coprogen	0
cpgn-un[c]	546	NA	NA	1.1798	0.8388	#VALUE!	cpgn-un	coprogen unloaded (no Fe(III))	0
crn-D[p]	552	NA	NA	1.1748	0.8388	#VALUE!	crn-D	D-Carnitine	C00487
damp[p]	594	NA	NA	1.1506	0.8388	#VALUE!	damp	dAMP	C00360
dann[c]	595	NA	NA	1.1497	0.8388	#VALUE!	dann	7,8-Diaminononanoate	C01037
dcyt[p]	612	NA	NA	1.1431	0.8388	#VALUE!	dcyt	Deoxycytidine	C00881
galctn-L[e]	825	NA	NA	1.0504	0.8388	#VALUE!	galctn-L	L-Galactonate	0
23cgmp[e]	62	NA	NA	1.3895	0.8388	#VALUE!	23cgmp	2',3'-Cyclic GMP	C06194
2dh3dgal[c]	124	NA	NA	1.3704	0.8388	#VALUE!	2dh3dgal	2-Dehydro-3-deoxy-D-galactonate	C01216
2dhglcn[c]	125	NA	NA	1.3691	0.8388	#VALUE!	2dhglcn	2-Dehydro-D-gluconate	C00629
2dhguln[c]	126	NA	NA	1.3677	0.8388	#VALUE!	2dhguln	2-Dehydro-L-gulonate	0
3hcinnm[c]	183	NA	NA	1.348	0.8388	#VALUE!	3hcinnm	3-hydroxycinnamic acid	0
3hcmrs7eACP[c]	186	NA	NA	1.3441	0.8388	#VALUE!	3hcmrs7eACP	(R)-3-hydroxy-cis-myristol-7-eoyl-[acyl-carrier protein]	0
3omrsACP[c]	220	NA	NA	1.32	0.8388	#VALUE!	3omrsACP	3-Oxotetradecanoyl-[acyl-carrier protein]	C05759
3ooctACP[c]	222	NA	NA	1.3187	0.8388	#VALUE!	3ooctACP	3-Oxooctanoyl-[acyl-carrier protein]	C05750
3ooctdACP[c]	223	NA	NA	1.3175	0.8388	#VALUE!	3ooctdACP	3-Oxooctadecanoyl-[acyl-carrier protein]	0
4h2opntn[c]	243	NA	NA	1.3101	0.8388	#VALUE!	4h2opntn	4-Hydroxy-2-oxopentanoate	C03589
4hoxpacd[e]	246	NA	NA	1.3077	0.8388	#VALUE!	4hoxpacd	4-Hydroxyphenylacetaldehyde	C03765
5mdr1p[c]	267	NA	NA	1.3028	0.8388	#VALUE!	5mdr1p	5-Methylthio-5-deoxy-D-ribose 1-phosphate	C04188
8aonn[c]	277	NA	NA	1.2967	0.8388	#VALUE!	8aonn	8-Amino-7-oxononanoate	C01092
acgam[e]	317	NA	NA	1.279	0.8388	#VALUE!	acgam	N-Acetyl-D-glucosamine	C00140
acnam[e]	330	NA	NA	1.2697	0.8388	#VALUE!	acnam	N-Acetylneuraminate	C00270
altrn[c]	396	NA	NA	1.2482	0.8388	#VALUE!	altrn	D-Altronate	C00817
ap4a[c]	414	NA	NA	1.2437	0.8388	#VALUE!	ap4a	P1,P4-Bis(5'-adenosyl) tetraphosphate	C01260
apoACP[c]	423	NA	NA	1.2415	0.8388	#VALUE!	apoACP	apoprotein [acyl carrier protein]	0
arab-L[c]	426	NA	NA	1.2404	0.8388	#VALUE!	arab-L	L-Arabinose	C00259
arab-L[e]	427	NA	NA	1.2393	0.8388	#VALUE!	arab-L	L-Arabinose	C00259
asntrna[c]	448	NA	NA	1.2252	0.8388	#VALUE!	asntrna	L-Asparaginyl-tRNA(Asn)	C03402
aso3[c]	449	NA	NA	1.2241	0.8388	#VALUE!	aso3	arsenite	C06697
dcmp[e]	607	NA	NA	1.1459	0.8388	#VALUE!	dcmp	dCMP	C00239
dimp[e]	643	NA	NA	1.1357	0.8388	#VALUE!	dimp	dIMP	C06196
dimp[p]	644	NA	NA	1.1348	0.8388	#VALUE!	dimp	dIMP	C06196
fldox[c]	760	NA	NA	1.0821	0.8388	#VALUE!	fldox	flavodoxin (oxidized)	C02869
g6p[e]	807	NA	NA	1.0624	0.8388	#VALUE!	g6p	D-Glucose 6-phosphate	C00092
g6p[p]	808	NA	NA	1.0616	0.8388	#VALUE!	g6p	D-Glucose 6-phosphate	C00092
gfgaragund[c]	853	NA	NA	1.0357	0.8388	#VALUE!	gfgaragund	galactofuranosyl-glucosyl-O-acetyl-rhamanosyl-N-acetylglucosamyl-undecaprenyl diphosphate	0
glyc2p[p]	898	NA	NA	1.0213	0.8388	#VALUE!	glyc2p	Glycerol 2-phosphate	C02979
gmp[p]	918	NA	NA	1.0191	0.8388	#VALUE!	gmp	GMP	C00144
hmgth[c]	985	NA	NA	1.0008	0.8388	#VALUE!	hmgth	hydroxymethylglutathione	0
hqn[c]	991	NA	NA	1.0001	0.8388	#VALUE!	hqn	Hydroquinone	C00530
ag[c]	359	NA	NA	1.2617	0.8388	#VALUE!	ag	silver	C06710
26dap-M[e]	82	NA	NA	1.3772	0.8388	#VALUE!	26dap-M	meso-2,6-Diaminoheptanedioate	C00680
26dap-M[p]	83	NA	NA	1.3758	0.8388	#VALUE!	26dap-M	meso-2,6-Diaminoheptanedioate	C00680
2ddglcn[c]	120	NA	NA	1.3744	0.8388	#VALUE!	2ddglcn	2-Dehydro-3-deoxy-D-gluconate	C00204
2ddglcn[e]	121	NA	NA	1.3731	0.8388	#VALUE!	2ddglcn	2-Dehydro-3-deoxy-D-gluconate	C00204
2ddglcn[p]	122	NA	NA	1.3718	0.8388	#VALUE!	2ddglcn	2-Dehydro-3-deoxy-D-gluconate	C00204
Sfglutth[c]	289	NA	NA	1.2931	0.8388	#VALUE!	Sfglutth	S-Formylglutathione	C01031
aacald[c]	290	NA	NA	1.292	0.8388	#VALUE!	aacald	Aminoacetaldehyde	C06735
acACP[c]	293	NA	NA	1.2908	0.8388	#VALUE!	acACP	Acetyl-ACP	0
adocbl[p]	353	NA	NA	1.2628	0.8388	#VALUE!	adocbl	Adenosylcobalamin	C00194
all-D[p]	389	NA	NA	1.2504	0.8388	#VALUE!	all-D	D-Allose	C01487
cd2[p]	490	NA	NA	1.1979	0.8388	#VALUE!	cd2	Cadmium	C01413
chol[e]	507	NA	NA	1.1918	0.8388	#VALUE!	chol	Choline	C00114
cyan[c]	570	NA	NA	1.1612	0.8388	#VALUE!	cyan	Hydrogen cyanide	C01326
cyan[e]	571	NA	NA	1.1602	0.8388	#VALUE!	cyan	Hydrogen cyanide	C01326
cyan[p]	572	NA	NA	1.1592	0.8388	#VALUE!	cyan	Hydrogen cyanide	C01326
cynt[c]	573	NA	NA	1.1583	0.8388	#VALUE!	cynt	Cyanate	C01417
cys-D[e]	577	NA	NA	1.1544	0.8388	#VALUE!	cys-D	D-Cysteine	C00793
dgsn[e]	624	NA	NA	1.1385	0.8388	#VALUE!	dgsn	Deoxyguanosine	C00330
dhcinnm[c]	631	NA	NA	1.1376	0.8388	#VALUE!	dhcinnm	2,3-dihydroxicinnamic acid	0
din[e]	646	NA	NA	1.1339	0.8388	#VALUE!	din	Deoxyinosine	C05512
dkmpp[c]	649	NA	NA	1.1329	0.8388	#VALUE!	dkmpp	2,3-diketo-5-methylthio-1-phosphopentane	0
dmbzid[c]	650	NA	NA	1.132	0.8388	#VALUE!	dmbzid	5,6-Dimethylbenzimidazole	C03114
fecrm[c]	744	NA	NA	1.0923	0.8388	#VALUE!	fecrm	Ferrichrome	C06228
fecrm[e]	745	NA	NA	1.0914	0.8388	#VALUE!	fecrm	Ferrichrome	C06228
fecrm[p]	746	NA	NA	1.0906	0.8388	#VALUE!	fecrm	Ferrichrome	C06228
fecrm-un[c]	747	NA	NA	1.0897	0.8388	#VALUE!	fecrm-un	Ferrichrome minus Fe(III)	0
fecrm-un[e]	748	NA	NA	1.0889	0.8388	#VALUE!	fecrm-un	Ferrichrome minus Fe(III)	0
fecrm-un[p]	749	NA	NA	1.088	0.8388	#VALUE!	fecrm-un	Ferrichrome minus Fe(III)	0
feoxam[c]	753	NA	NA	1.0872	0.8388	#VALUE!	feoxam	ferroxamine	0
feoxam[e]	754	NA	NA	1.0863	0.8388	#VALUE!	feoxam	ferroxamine	0
feoxam[p]	755	NA	NA	1.0855	0.8388	#VALUE!	feoxam	ferroxamine	0
feoxam-un[c]	756	NA	NA	1.0846	0.8388	#VALUE!	feoxam-un	ferroxamine minus Fe(3)	0
feoxam-un[e]	757	NA	NA	1.0838	0.8388	#VALUE!	feoxam-un	ferroxamine minus Fe(3)	0
fruur[c]	778	NA	NA	1.0763	0.8388	#VALUE!	fruur	D-Fructuronate	C00905
fruur[e]	779	NA	NA	1.0755	0.8388	#VALUE!	fruur	D-Fructuronate	C00905
fruur[p]	780	NA	NA	1.0746	0.8388	#VALUE!	fruur	D-Fructuronate	C00905
fuc-L[c]	781	NA	NA	1.0738	0.8388	#VALUE!	fuc-L	L-Fucose	C01019
fuc-L[e]	782	NA	NA	1.073	0.8388	#VALUE!	fuc-L	L-Fucose	C01019
fuc-L[p]	783	NA	NA	1.0722	0.8388	#VALUE!	fuc-L	L-Fucose	C01019
g1p[e]	788	NA	NA	1.0714	0.8388	#VALUE!	g1p	D-Glucose 1-phosphate	C00103
g1p[p]	789	NA	NA	1.0705	0.8388	#VALUE!	g1p	D-Glucose 1-phosphate	C00103
g3pc[c]	791	NA	NA	1.0697	0.8388	#VALUE!	g3pc	sn-Glycero-3-phosphocholine	C00670
g3pc[e]	792	NA	NA	1.0689	0.8388	#VALUE!	g3pc	sn-Glycero-3-phosphocholine	C00670
g3pc[p]	793	NA	NA	1.0681	0.8388	#VALUE!	g3pc	sn-Glycero-3-phosphocholine	C00670
g3pi[c]	800	NA	NA	1.0673	0.8388	#VALUE!	g3pi	sn-Glycero-3-phospho-1-inositol	C01225
g3pi[e]	801	NA	NA	1.0665	0.8388	#VALUE!	g3pi	sn-Glycero-3-phospho-1-inositol	C01225
g3pi[p]	802	NA	NA	1.0656	0.8388	#VALUE!	g3pi	sn-Glycero-3-phospho-1-inositol	C01225
g3ps[c]	803	NA	NA	1.0648	0.8388	#VALUE!	g3ps	Glycerophosphoserine	0
g3ps[e]	804	NA	NA	1.064	0.8388	#VALUE!	g3ps	Glycerophosphoserine	0
g3ps[p]	805	NA	NA	1.0632	0.8388	#VALUE!	g3ps	Glycerophosphoserine	0
gal1p[p]	812	NA	NA	1.06	0.8388	#VALUE!	gal1p	alpha-D-Galactose 1-phosphate	C00446
gal-bD[p]	814	NA	NA	1.0584	0.8388	#VALUE!	gal-bD	beta D-Galactose	C01582
gthox[e]	927	NA	NA	1.0154	0.8388	#VALUE!	gthox	Oxidized glutathione	C00127
gthox[p]	928	NA	NA	1.0146	0.8388	#VALUE!	gthox	Oxidized glutathione	C00127
23cgmp[p]	63	NA	NA	1.3881	0.8388	#VALUE!	23cgmp	2',3'-Cyclic GMP	C06194
3hcpalm9eACP[c]	187	NA	NA	1.3428	0.8388	#VALUE!	3hcpalm9eACP	(R)-3-hydroxy-cis-palm-9-eoyl-[acyl-carrier protein]	0
4hoxpacd[p]	247	NA	NA	1.3064	0.8388	#VALUE!	4hoxpacd	4-Hydroxyphenylacetaldehyde	C03765
acgal[p]	311	NA	NA	1.2825	0.8388	#VALUE!	acgal	N-Acetyl-D-galactosamine	C01132
amp[p]	402	NA	NA	1.2448	0.8388	#VALUE!	amp	AMP	C00020
ddca[e]	616	NA	NA	1.1413	0.8388	#VALUE!	ddca	Dodecanoate (n-C12:0)	C02679
glcr[c]	866	NA	NA	1.0349	0.8388	#VALUE!	glcr	D-Glucarate	C00818
glcur1p[e]	869	NA	NA	1.0326	0.8388	#VALUE!	glcur1p	D-Glucuronate 1-phosphate	C05385
argtrna[c]	441	NA	NA	1.2284	0.8388	#VALUE!	argtrna	L-Arginyl-tRNA(Arg)	C02163
btnso[c]	467	NA	NA	1.2146	0.8388	#VALUE!	btnso	d-biotin d-sulfoxide	0
but2eACP[c]	468	NA	NA	1.2135	0.8388	#VALUE!	but2eACP	But-2-enoyl-[acyl-carrier protein]	C04246
csn[p]	559	NA	NA	1.1689	0.8388	#VALUE!	csn	Cytosine	C00380
ctbt[c]	560	NA	NA	1.1679	0.8388	#VALUE!	ctbt	crotonobetaine	C04114
ctbt[p]	561	NA	NA	1.167	0.8388	#VALUE!	ctbt	crotonobetaine	C04114
dcyt[e]	611	NA	NA	1.1441	0.8388	#VALUE!	dcyt	Deoxycytidine	C00881
ddcaACP[c]	614	NA	NA	1.1422	0.8388	#VALUE!	ddcaACP	Dodecanoyl-ACP (n-C12:0ACP)	C05223
fldrd[c]	761	NA	NA	1.0813	0.8388	#VALUE!	fldrd	flavodoxin (reduced)	C02745
gam6p[e]	835	NA	NA	1.0442	0.8388	#VALUE!	gam6p	D-Glucosamine 6-phosphate	C00352
gam6p[p]	836	NA	NA	1.0434	0.8388	#VALUE!	gam6p	D-Glucosamine 6-phosphate	C00352
3hcinnm[p]	185	NA	NA	1.3454	0.8388	#VALUE!	3hcinnm	3-hydroxycinnamic acid	0
3ocddec5eACP[c]	209	NA	NA	1.3288	0.8388	#VALUE!	3ocddec5eACP	3-oxo-cis-dodec-5-enoyl-[acyl-carrier protein]	0
3ocmrs7eACP[c]	210	NA	NA	1.3275	0.8388	#VALUE!	3ocmrs7eACP	3-oxo-cis-myristol-7-eoyl-[acyl-carrier protein]	0
3ocpalm9eACP[c]	211	NA	NA	1.3262	0.8388	#VALUE!	3ocpalm9eACP	3-oxo-cis-palm-9-eoyl-[acyl-carrier protein]	0
ag[e]	360	NA	NA	1.2605	0.8388	#VALUE!	ag	silver	C06710
cenchddd[c]	502	NA	NA	1.1938	0.8388	#VALUE!	cenchddd	cis-3-(3-carboxyethenyl)-3,5-cyclohexadiene-1,2-diol	0
cpgn-un[p]	548	NA	NA	1.1778	0.8388	#VALUE!	cpgn-un	coprogen unloaded (no Fe(III))	0
dhpppn[c]	638	NA	NA	1.1366	0.8388	#VALUE!	dhpppn	3-(2,3-Dihydroxyphenyl)propanoate	C04044
galctn-D[p]	823	NA	NA	1.052	0.8388	#VALUE!	galctn-D	D-Galactonate	C00880
galt[p]	829	NA	NA	1.0473	0.8388	#VALUE!	galt	Galactitol	C01697
hg2[e]	971	NA	NA	1.0037	0.8388	#VALUE!	hg2	Hg2+	C00703
actACP[c]	341	NA	NA	1.2674	0.8388	#VALUE!	actACP	Acetoacetyl-ACP	C05744
3hhexACP[c]	195	NA	NA	1.3377	0.8388	#VALUE!	3hhexACP	(R)-3-Hydroxyhexanoyl-[acyl-carrier protein]	C05747
3dhgulnp[c]	175	NA	NA	1.3545	0.8388	#VALUE!	3dhgulnp	3-keto-L-gulonate-6-phosphate	0
Nmtrp[c]	288	NA	NA	1.2943	0.8388	#VALUE!	Nmtrp	N-Methyltryptophan	C02983
23camp[p]	59	NA	NA	1.3936	0.8388	#VALUE!	23camp	2',3'-Cyclic AMP	C02353
23ccmp[p]	61	NA	NA	1.3908	0.8388	#VALUE!	23ccmp	2',3'-Cyclic CMP	C02354
23cump[e]	64	NA	NA	1.3867	0.8388	#VALUE!	23cump	2',3'-Cyclic UMP	C02355
23cump[p]	65	NA	NA	1.3853	0.8388	#VALUE!	23cump	2',3'-Cyclic UMP	C02355
3gmp[e]	178	NA	NA	1.3532	0.8388	#VALUE!	3gmp	3'-GMP	C06193
3hoctACP[c]	198	NA	NA	1.3351	0.8388	#VALUE!	3hoctACP	(R)-3-Hydroxyoctanoyl-[acyl-carrier protein]	C04620
3hoctaACP[c]	199	NA	NA	1.3338	0.8388	#VALUE!	3hoctaACP	(R)-3-Hydroxyoctadecanoyl-[acyl-carrier protein]	0
3ump[e]	232	NA	NA	1.3138	0.8388	#VALUE!	3ump	3'-UMP	C01368
4mhetz[c]	249	NA	NA	1.3052	0.8388	#VALUE!	4mhetz	4-Methyl-5-(2-hydroxyethyl)-thiazole	C04294
acgal[e]	310	NA	NA	1.2837	0.8388	#VALUE!	acgal	N-Acetyl-D-galactosamine	C01132
amp[e]	401	NA	NA	1.2459	0.8388	#VALUE!	amp	AMP	C00020
aso3[e]	450	NA	NA	1.2231	0.8388	#VALUE!	aso3	arsenite	C06697
aso3[p]	451	NA	NA	1.222	0.8388	#VALUE!	aso3	arsenite	C06697
aso4[c]	452	NA	NA	1.2209	0.8388	#VALUE!	aso4	arsenate	C01478
bbtcoa[c]	461	NA	NA	1.2188	0.8388	#VALUE!	bbtcoa	gamma-butyrobetainyl-CoA	0
betald[c]	462	NA	NA	1.2177	0.8388	#VALUE!	betald	Betaine aldehyde	C00576
crnDcoa[c]	550	NA	NA	1.1768	0.8388	#VALUE!	crnDcoa	D-carnitinyl-CoA	0
crn-D[c]	551	NA	NA	1.1758	0.8388	#VALUE!	crn-D	D-Carnitine	C00487
dcmp[p]	608	NA	NA	1.145	0.8388	#VALUE!	dcmp	dCMP	C00239
dms[c]	653	NA	NA	1.1311	0.8388	#VALUE!	dms	Dimethyl sulfide	C00580
dtmp[p]	682	NA	NA	1.1149	0.8388	#VALUE!	dtmp	dTMP	C00364
f1p[c]	715	NA	NA	1.1087	0.8388	#VALUE!	f1p	D-Fructose 1-phosphate	C02976
fald[e]	722	NA	NA	1.1052	0.8388	#VALUE!	fald	Formaldehyde	C00067
glntrna[c]	877	NA	NA	1.0273	0.8388	#VALUE!	glntrna	L-Glutaminyl-tRNA(Gln)	C02282
23camp[e]	58	NA	NA	1.395	0.8388	#VALUE!	23camp	2',3'-Cyclic AMP	C02353
3hpalmACP[c]	201	NA	NA	1.3326	0.8388	#VALUE!	3hpalmACP	R-3-hydroxypalmitoyl-[acyl-carrier protein]	C04633
3hpppn[c]	202	NA	NA	1.3313	0.8388	#VALUE!	3hpppn	3-(3-hydroxy-phenyl)propionate	0
3hpppn[e]	203	NA	NA	1.33	0.8388	#VALUE!	3hpppn	3-(3-hydroxy-phenyl)propionate	0
ascb6p[c]	442	NA	NA	1.2274	0.8388	#VALUE!	ascb6p	L-ascorbate-6-phosphate	0
ascb-L[e]	443	NA	NA	1.2263	0.8388	#VALUE!	ascb-L	L-Ascorbate	C00072
btal[c]	464	NA	NA	1.2167	0.8388	#VALUE!	btal	Butanal	C01412
glcr[e]	867	NA	NA	1.0341	0.8388	#VALUE!	glcr	D-Glucarate	C00818
fald[c]	721	NA	NA	1.1061	0.8388	#VALUE!	fald	Formaldehyde	C00067
fald[p]	723	NA	NA	1.1043	0.8388	#VALUE!	fald	Formaldehyde	C00067
gln-L[p]	876	NA	NA	1.0281	0.8388	#VALUE!	gln-L	L-Glutamine	C00064
23dappa[c]	66	NA	NA	1.384	0.8388	#VALUE!	23dappa	2,3-diaminopropionate	C06393
23dappa[e]	67	NA	NA	1.3826	0.8388	#VALUE!	23dappa	2,3-diaminopropionate	C06393
23dappa[p]	68	NA	NA	1.3812	0.8388	#VALUE!	23dappa	2,3-diaminopropionate	C06393
23doguln[c]	76	NA	NA	1.3799	0.8388	#VALUE!	23doguln	2,3-Dioxo-L-gulonate	C05409
25dkglcn[c]	78	NA	NA	1.3785	0.8388	#VALUE!	25dkglcn	2,5-diketo-D-gluconate	C02780
acgam1p[p]	314	NA	NA	1.2801	0.8388	#VALUE!	acgam1p	N-Acetyl-D-glucosamine 1-phosphate	C04256
acmana[e]	323	NA	NA	1.2755	0.8388	#VALUE!	acmana	N-Acetyl-D-mannosamine	C00645
acmana[p]	324	NA	NA	1.2743	0.8388	#VALUE!	acmana	N-Acetyl-D-mannosamine	C00645
acmum[e]	327	NA	NA	1.2731	0.8388	#VALUE!	acmum	N-Acetylmuramate	C02713
acmum[p]	328	NA	NA	1.272	0.8388	#VALUE!	acmum	N-Acetylmuramate	C02713
acnam[c]	329	NA	NA	1.2708	0.8388	#VALUE!	acnam	N-Acetylneuraminate	C00270
adocbip[c]	350	NA	NA	1.2651	0.8388	#VALUE!	adocbip	Adenosyl cobinamide phosphate	C06509
cu[p]	569	NA	NA	1.1621	0.8388	#VALUE!	cu	Cu+	0
dxyl[c]	693	NA	NA	1.1122	0.8388	#VALUE!	dxyl	1-deoxy-D-xylulose	C06257
fru[e]	772	NA	NA	1.0796	0.8388	#VALUE!	fru	D-Fructose	C00095
frulys[c]	774	NA	NA	1.0788	0.8388	#VALUE!	frulys	fructoselysine	0
frulys[e]	775	NA	NA	1.078	0.8388	#VALUE!	frulys	fructoselysine	0
frulys[p]	776	NA	NA	1.0771	0.8388	#VALUE!	frulys	fructoselysine	0
gbbtn[c]	841	NA	NA	1.0403	0.8388	#VALUE!	gbbtn	gamma-butyrobetaine	0
gbbtn[e]	842	NA	NA	1.0395	0.8388	#VALUE!	gbbtn	gamma-butyrobetaine	0
gbbtn[p]	843	NA	NA	1.0387	0.8388	#VALUE!	gbbtn	gamma-butyrobetaine	0
gcald[c]	844	NA	NA	1.038	0.8388	#VALUE!	gcald	Glycolaldehyde	C00266
gdp[e]	846	NA	NA	1.0372	0.8388	#VALUE!	gdp	GDP	C00035
gdp[p]	847	NA	NA	1.0364	0.8388	#VALUE!	gdp	GDP	C00035
hdcea[e]	963	NA	NA	1.0066	0.8388	#VALUE!	hdcea	Hexadecenoate (n-C16:1)	0
ACP[c]	278	NA	NA	1.2955	0.8388	#VALUE!	ACP	acyl carrier protein	C00229
crn[e]	554	NA	NA	1.1728	0.8388	#VALUE!	crn	L-Carnitine	C00318
crncoa[c]	556	NA	NA	1.1709	0.8388	#VALUE!	crncoa	L-Carnitinyl-CoA	0
gp4g[c]	919	NA	NA	1.0183	0.8388	#VALUE!	gp4g	P1,P4-Bis(5'-guanosyl) tetraphosphate	C01261
12ppd-S[e]	20	NA	NA	1.3978	0.8388	#VALUE!	12ppd-S	(S)-Propane-1,2-diol	C02917
12ppd-S[p]	21	NA	NA	1.3964	0.8388	#VALUE!	12ppd-S	(S)-Propane-1,2-diol	C02917
3hddecACP[c]	191	NA	NA	1.3402	0.8388	#VALUE!	3hddecACP	(R)-3-Hydroxydodecanoyl-[acyl-carrier protein]	C05757
3opalmACP[c]	225	NA	NA	1.3163	0.8388	#VALUE!	3opalmACP	3-Oxohexadecanoyl-[acyl-carrier protein]	C05762
4ahmmp[c]	240	NA	NA	1.3113	0.8388	#VALUE!	4ahmmp	4-Amino-5-hydroxymethyl-2-methylpyrimidine	C01279
5mtr[c]	271	NA	NA	1.2992	0.8388	#VALUE!	5mtr	5-Methylthio-D-ribose	C03089
5prdmbz[c]	272	NA	NA	1.2979	0.8388	#VALUE!	5prdmbz	N1-(5-Phospho-alpha-D-ribosyl)-5,6-dimethylbenzimidazole	C04778
adocbl[e]	352	NA	NA	1.2639	0.8388	#VALUE!	adocbl	Adenosylcobalamin	C00194
ala-B[e]	373	NA	NA	1.2583	0.8388	#VALUE!	ala-B	beta-Alanine	C00099
ala-B[p]	374	NA	NA	1.2571	0.8388	#VALUE!	ala-B	beta-Alanine	C00099
alpp[p]	395	NA	NA	1.2493	0.8388	#VALUE!	alpp	applipoprotein	C01834
arbtn[c]	431	NA	NA	1.2349	0.8388	#VALUE!	arbtn	aerobactin minus Fe3	0
arbtn[e]	432	NA	NA	1.2339	0.8388	#VALUE!	arbtn	aerobactin minus Fe3	0
cpgn-un[e]	547	NA	NA	1.1788	0.8388	#VALUE!	cpgn-un	coprogen unloaded (no Fe(III))	0
crn[p]	555	NA	NA	1.1718	0.8388	#VALUE!	crn	L-Carnitine	C00318
cystrna[c]	583	NA	NA	1.1525	0.8388	#VALUE!	cystrna	L-Cysteinyl-tRNA(Cys)	C03125
dcaACP[c]	599	NA	NA	1.1488	0.8388	#VALUE!	dcaACP	Decanoyl-ACP (n-C10:0ACP)	C05755
dgmp[p]	622	NA	NA	1.1394	0.8388	#VALUE!	dgmp	dGMP	C00362
dms[p]	655	NA	NA	1.1293	0.8388	#VALUE!	dms	Dimethyl sulfide	C00580
dmso[c]	656	NA	NA	1.1284	0.8388	#VALUE!	dmso	Dimethyl sulfoxide	C11143
dmso[e]	657	NA	NA	1.1275	0.8388	#VALUE!	dmso	Dimethyl sulfoxide	C11143
dmso[p]	658	NA	NA	1.1266	0.8388	#VALUE!	dmso	Dimethyl sulfoxide	C11143
dopa[e]	660	NA	NA	1.1257	0.8388	#VALUE!	dopa	Dopamine	C03758
dopa[p]	661	NA	NA	1.1247	0.8388	#VALUE!	dopa	Dopamine	C03758
dsbaox[p]	663	NA	NA	1.1238	0.8388	#VALUE!	dsbaox	periplasmic protein disulfide isomerase I (oxidized)	0
dsbard[p]	664	NA	NA	1.1229	0.8388	#VALUE!	dsbard	periplasmic protein disulfide isomerase I (reduced)	0
dsbcox[p]	665	NA	NA	1.122	0.8388	#VALUE!	dsbcox	protein disulfide isomerase II (oxidized)	0
dsbcrd[p]	666	NA	NA	1.1211	0.8388	#VALUE!	dsbcrd	protein disulfide isomerase II (reduced)	0
dsbdox[c]	667	NA	NA	1.1202	0.8388	#VALUE!	dsbdox	fused thiol:disulfide interchange protein (oxidized)	0
dsbdrd[c]	668	NA	NA	1.1194	0.8388	#VALUE!	dsbdrd	fused thiol:disulfide interchange protein (reduced)	0
dsbgox[p]	669	NA	NA	1.1185	0.8388	#VALUE!	dsbgox	periplasmic disulfide isomerase/thiol-disulphide oxidase (oxidized)	0
dsbgrd[p]	670	NA	NA	1.1176	0.8388	#VALUE!	dsbgrd	periplasmic disulfide isomerase/thiol-disulphide oxidase (reduced)	0
dump[e]	686	NA	NA	1.114	0.8388	#VALUE!	dump	dUMP	C00365
ethso3[c]	709	NA	NA	1.1113	0.8388	#VALUE!	ethso3	ethanesulfonate	0
ethso3[e]	710	NA	NA	1.1105	0.8388	#VALUE!	ethso3	ethanesulfonate	0
f6p[e]	717	NA	NA	1.1078	0.8388	#VALUE!	f6p	D-Fructose 6-phosphate	C00085
f6p[p]	718	NA	NA	1.107	0.8388	#VALUE!	f6p	D-Fructose 6-phosphate	C00085
fe3hox-un[e]	742	NA	NA	1.094	0.8388	#VALUE!	fe3hox-un	Fe(III)hydoxamate, unloaded	0
fe3hox-un[p]	743	NA	NA	1.0931	0.8388	#VALUE!	fe3hox-un	Fe(III)hydoxamate, unloaded	0
galct-D[c]	818	NA	NA	1.056	0.8388	#VALUE!	galct-D	D-Galactarate	C00879
galctn-L[c]	824	NA	NA	1.0512	0.8388	#VALUE!	galctn-L	L-Galactonate	0
glyc2p[e]	897	NA	NA	1.0221	0.8388	#VALUE!	glyc2p	Glycerol 2-phosphate	C02979
3odecACP[c]	216	NA	NA	1.3225	0.8388	#VALUE!	3odecACP	3-Oxodecanoyl-[acyl-carrier protein]	C05753
ala-L[p]	380	NA	NA	1.2549	0.8388	#VALUE!	ala-L	L-Alanine	C00041
gly[p]	890	NA	NA	1.025	0.8388	#VALUE!	gly	Glycine	C00037
fe3hox-un[c]	741	NA	NA	1.0948	0.8388	#VALUE!	fe3hox-un	Fe(III)hydoxamate, unloaded	0
csn[e]	558	NA	NA	1.1699	0.8388	#VALUE!	csn	Cytosine	C00380
3hcddec5eACP[c]	182	NA	NA	1.3493	0.8388	#VALUE!	3hcddec5eACP	(R)-3-hydroxy-cis-dodec-5-enoyl-[acyl-carrier protein]	0
feoxam-un[p]	758	NA	NA	1.083	0.8388	#VALUE!	feoxam-un	ferroxamine minus Fe(3)	0
galct-D[p]	820	NA	NA	1.0544	0.8388	#VALUE!	galct-D	D-Galactarate	C00879
all-D[e]	388	NA	NA	1.2515	0.8388	#VALUE!	all-D	D-Allose	C01487
2kmb[c]	138	NA	NA	1.3664	0.8388	#VALUE!	2kmb	2-keto-4-methylthiobutyrate	0
2pglyc[c]	157	NA	NA	1.3651	0.8388	#VALUE!	2pglyc	2-Phosphoglycolate	C00988
gtp[e]	933	NA	NA	1.0139	0.8388	#VALUE!	gtp	GTP	C00044
gtp[p]	934	NA	NA	1.0132	0.8388	#VALUE!	gtp	GTP	C00044
cynt[e]	574	NA	NA	1.1573	0.8388	#VALUE!	cynt	Cyanate	C01417
cynt[p]	575	NA	NA	1.1564	0.8388	#VALUE!	cynt	Cyanate	C01417
cys-D[p]	578	NA	NA	1.1535	0.8388	#VALUE!	cys-D	D-Cysteine	C00793
fe3dcit[p]	734	NA	NA	1.1009	0.8388	#VALUE!	fe3dcit	Fe(III)dicitrate	C06229
fe3dhbzs[c]	735	NA	NA	1.1	0.8388	#VALUE!	fe3dhbzs	ferric 2,3-dihydroxybenzoylserine	0
gal[e]	816	NA	NA	1.0576	0.8388	#VALUE!	gal	D-Galactose	C00124
galct-D[e]	819	NA	NA	1.0552	0.8388	#VALUE!	galct-D	D-Galactarate	C00879
hacolipa[e]	955	NA	NA	1.0088	0.8388	#VALUE!	hacolipa	hepta-acylated core oligosaccharide lipid A (E. coli)	0
gmp[e]	917	NA	NA	1.0198	0.8388	#VALUE!	gmp	GMP	C00144
4hba[c]	244	NA	NA	1.3089	0.8388	#VALUE!	4hba	4-Hydroxy-benzyl alcohol	0
NA	NA	NA	NA	NA	NA	#VALUE!	NA	#N/A	#N/A
NA	NA	NA	NA	NA	NA	#VALUE!	NA	#N/A	#N/A
NA	NA	NA	NA	NA	NA	#VALUE!	NA	#N/A	#N/A
NA	NA	NA	NA	NA	NA	#VALUE!	NA	#N/A	#N/A
NA	NA	NA	NA	NA	NA	#VALUE!	NA	#N/A	#N/A
NA	NA	NA	NA	NA	NA	#VALUE!	NA	#N/A	#N/A
NA	NA	NA	NA	NA	NA	#VALUE!	NA	#N/A	#N/A
NA	NA	NA	NA	NA	NA	#VALUE!	NA	#N/A	#N/A
NA	NA	NA	NA	NA	NA	#VALUE!	NA	#N/A	#N/A
NA	NA	NA	NA	NA	NA	#VALUE!	NA	#N/A	#N/A
NA	NA	NA	NA	NA	NA	#VALUE!	NA	#N/A	#N/A
NA	NA	NA	NA	NA	NA	#VALUE!	NA	#N/A	#N/A
NA	NA	NA	NA	NA	NA	#VALUE!	NA	#N/A	#N/A
NA	NA	NA	NA	NA	NA	#VALUE!	NA	#N/A	#N/A
NA	NA	NA	NA	NA	NA	#VALUE!	NA	#N/A	#N/A
NA	NA	NA	NA	NA	NA	#VALUE!	NA	#N/A	#N/A
NA	NA	NA	NA	NA	NA	#VALUE!	NA	#N/A	#N/A
NA	NA	NA	NA	NA	NA	#VALUE!	NA	#N/A	#N/A
NA	NA	NA	NA	NA	NA	#VALUE!	NA	#N/A	#N/A
NA	NA	NA	NA	NA	NA	#VALUE!	NA	#N/A	#N/A
NA	NA	NA	NA	NA	NA	#VALUE!	NA	#N/A	#N/A
NA	NA	NA	NA	NA	NA	#VALUE!	NA	#N/A	#N/A
NA	NA	NA	NA	NA	NA	#VALUE!	NA	#N/A	#N/A
NA	NA	NA	NA	NA	NA	#VALUE!	NA	#N/A	#N/A
NA	NA	NA	NA	NA	NA	#VALUE!	NA	#N/A	#N/A
NA	NA	NA	NA	NA	NA	#VALUE!	NA	#N/A	#N/A
NA	NA	NA	NA	NA	NA	#VALUE!	NA	#N/A	#N/A
NA	NA	NA	NA	NA	NA	#VALUE!	NA	#N/A	#N/A
NA	NA	NA	NA	NA	NA	#VALUE!	NA	#N/A	#N/A
NA	NA	NA	NA	NA	NA	#VALUE!	NA	#N/A	#N/A
NA	NA	NA	NA	NA	NA	#VALUE!	NA	#N/A	#N/A
NA	NA	NA	NA	NA	NA	#VALUE!	NA	#N/A	#N/A
NA	NA	NA	NA	NA	NA	#VALUE!	NA	#N/A	#N/A
NA	NA	NA	NA	NA	NA	#VALUE!	NA	#N/A	#N/A
NA	NA	NA	NA	NA	NA	#VALUE!	NA	#N/A	#N/A
NA	NA	NA	NA	NA	NA	#VALUE!	NA	#N/A	#N/A
NA	NA	NA	NA	NA	NA	#VALUE!	NA	#N/A	#N/A
NA	NA	NA	NA	NA	NA	#VALUE!	NA	#N/A	#N/A
NA	NA	NA	NA	NA	NA	#VALUE!	NA	#N/A	#N/A
NA	NA	NA	NA	NA	NA	#VALUE!	NA	#N/A	#N/A
NA	NA	NA	NA	NA	NA	#VALUE!	NA	#N/A	#N/A
NA	NA	NA	NA	NA	NA	#VALUE!	NA	#N/A	#N/A
NA	NA	NA	NA	NA	NA	#VALUE!	NA	#N/A	#N/A
NA	NA	NA	NA	NA	NA	#VALUE!	NA	#N/A	#N/A
NA	NA	NA	NA	NA	NA	#VALUE!	NA	#N/A	#N/A
NA	NA	NA	NA	NA	NA	#VALUE!	NA	#N/A	#N/A
NA	NA	NA	NA	NA	NA	#VALUE!	NA	#N/A	#N/A
NA	NA	NA	NA	NA	NA	#VALUE!	NA	#N/A	#N/A
NA	NA	NA	NA	NA	NA	#VALUE!	NA	#N/A	#N/A
NA	NA	NA	NA	NA	NA	#VALUE!	NA	#N/A	#N/A
NA	NA	NA	NA	NA	NA	#VALUE!	NA	#N/A	#N/A
NA	NA	NA	NA	NA	NA	#VALUE!	NA	#N/A	#N/A
NA	NA	NA	NA	NA	NA	#VALUE!	NA	#N/A	#N/A
NA	NA	NA	NA	NA	NA	#VALUE!	NA	#N/A	#N/A
NA	NA	NA	NA	NA	NA	#VALUE!	NA	#N/A	#N/A
NA	NA	NA	NA	NA	NA	#VALUE!	NA	#N/A	#N/A
NA	NA	NA	NA	NA	NA	#VALUE!	NA	#N/A	#N/A
NA	NA	NA	NA	NA	NA	#VALUE!	NA	#N/A	#N/A
NA	NA	NA	NA	NA	NA	#VALUE!	NA	#N/A	#N/A
NA	NA	NA	NA	NA	NA	#VALUE!	NA	#N/A	#N/A
NA	NA	NA	NA	NA	NA	#VALUE!	NA	#N/A	#N/A
NA	NA	NA	NA	NA	NA	#VALUE!	NA	#N/A	#N/A
NA	NA	NA	NA	NA	NA	#VALUE!	NA	#N/A	#N/A
NA	NA	NA	NA	NA	NA	#VALUE!	NA	#N/A	#N/A
NA	NA	NA	NA	NA	NA	#VALUE!	NA	#N/A	#N/A
NA	NA	NA	NA	NA	NA	#VALUE!	NA	#N/A	#N/A
NA	NA	NA	NA	NA	NA	#VALUE!	NA	#N/A	#N/A
NA	NA	NA	NA	NA	NA	#VALUE!	NA	#N/A	#N/A
NA	NA	NA	NA	NA	NA	#VALUE!	NA	#N/A	#N/A
NA	NA	NA	NA	NA	NA	#VALUE!	NA	#N/A	#N/A
NA	NA	NA	NA	NA	NA	#VALUE!	NA	#N/A	#N/A
NA	NA	NA	NA	NA	NA	#VALUE!	NA	#N/A	#N/A
NA	NA	NA	NA	NA	NA	#VALUE!	NA	#N/A	#N/A
NA	NA	NA	NA	NA	NA	#VALUE!	NA	#N/A	#N/A
NA	NA	NA	NA	NA	NA	#VALUE!	NA	#N/A	#N/A
NA	NA	NA	NA	NA	NA	#VALUE!	NA	#N/A	#N/A
NA	NA	NA	NA	NA	NA	#VALUE!	NA	#N/A	#N/A
NA	NA	NA	NA	NA	NA	#VALUE!	NA	#N/A	#N/A
NA	NA	NA	NA	NA	NA	#VALUE!	NA	#N/A	#N/A
NA	NA	NA	NA	NA	NA	#VALUE!	NA	#N/A	#N/A
NA	NA	NA	NA	NA	NA	#VALUE!	NA	#N/A	#N/A
NA	NA	NA	NA	NA	NA	#VALUE!	NA	#N/A	#N/A
NA	NA	NA	NA	NA	NA	#VALUE!	NA	#N/A	#N/A
NA	NA	NA	NA	NA	NA	#VALUE!	NA	#N/A	#N/A
NA	NA	NA	NA	NA	NA	#VALUE!	NA	#N/A	#N/A
NA	NA	NA	NA	NA	NA	#VALUE!	NA	#N/A	#N/A
NA	NA	NA	NA	NA	NA	#VALUE!	NA	#N/A	#N/A
NA	NA	NA	NA	NA	NA	#VALUE!	NA	#N/A	#N/A
NA	NA	NA	NA	NA	NA	#VALUE!	NA	#N/A	#N/A
NA	NA	NA	NA	NA	NA	#VALUE!	NA	#N/A	#N/A
NA	NA	NA	NA	NA	NA	#VALUE!	NA	#N/A	#N/A
NA	NA	NA	NA	NA	NA	#VALUE!	NA	#N/A	#N/A
NA	NA	NA	NA	NA	NA	#VALUE!	NA	#N/A	#N/A
NA	NA	NA	NA	NA	NA	#VALUE!	NA	#N/A	#N/A
NA	NA	NA	NA	NA	NA	#VALUE!	NA	#N/A	#N/A
NA	NA	NA	NA	NA	NA	#VALUE!	NA	#N/A	#N/A
NA	NA	NA	NA	NA	NA	#VALUE!	NA	#N/A	#N/A
NA	NA	NA	NA	NA	NA	#VALUE!	NA	#N/A	#N/A
NA	NA	NA	NA	NA	NA	#VALUE!	NA	#N/A	#N/A
NA	NA	NA	NA	NA	NA	#VALUE!	NA	#N/A	#N/A
NA	NA	NA	NA	NA	NA	#VALUE!	NA	#N/A	#N/A
NA	NA	NA	NA	NA	NA	#VALUE!	NA	#N/A	#N/A
NA	NA	NA	NA	NA	NA	#VALUE!	NA	#N/A	#N/A
NA	NA	NA	NA	NA	NA	#VALUE!	NA	#N/A	#N/A
NA	NA	NA	NA	NA	NA	#VALUE!	NA	#N/A	#N/A
NA	NA	NA	NA	NA	NA	#VALUE!	NA	#N/A	#N/A
NA	NA	NA	NA	NA	NA	#VALUE!	NA	#N/A	#N/A
NA	NA	NA	NA	NA	NA	#VALUE!	NA	#N/A	#N/A
NA	NA	NA	NA	NA	NA	#VALUE!	NA	#N/A	#N/A
NA	NA	NA	NA	NA	NA	#VALUE!	NA	#N/A	#N/A
NA	NA	NA	NA	NA	NA	#VALUE!	NA	#N/A	#N/A
NA	NA	NA	NA	NA	NA	#VALUE!	NA	#N/A	#N/A
NA	NA	NA	NA	NA	NA	#VALUE!	NA	#N/A	#N/A
NA	NA	NA	NA	NA	NA	#VALUE!	NA	#N/A	#N/A
NA	NA	NA	NA	NA	NA	#VALUE!	NA	#N/A	#N/A
NA	NA	NA	NA	NA	NA	#VALUE!	NA	#N/A	#N/A
NA	NA	NA	NA	NA	NA	#VALUE!	NA	#N/A	#N/A
NA	NA	NA	NA	NA	NA	#VALUE!	NA	#N/A	#N/A
NA	NA	NA	NA	NA	NA	#VALUE!	NA	#N/A	#N/A
NA	NA	NA	NA	NA	NA	#VALUE!	NA	#N/A	#N/A
NA	NA	NA	NA	NA	NA	#VALUE!	NA	#N/A	#N/A
NA	NA	NA	NA	NA	NA	#VALUE!	NA	#N/A	#N/A
NA	NA	NA	NA	NA	NA	#VALUE!	NA	#N/A	#N/A
NA	NA	NA	NA	NA	NA	#VALUE!	NA	#N/A	#N/A
NA	NA	NA	NA	NA	NA	#VALUE!	NA	#N/A	#N/A
NA	NA	NA	NA	NA	NA	#VALUE!	NA	#N/A	#N/A
NA	NA	NA	NA	NA	NA	#VALUE!	NA	#N/A	#N/A
NA	NA	NA	NA	NA	NA	#VALUE!	NA	#N/A	#N/A
NA	NA	NA	NA	NA	NA	#VALUE!	NA	#N/A	#N/A
NA	NA	NA	NA	NA	NA	#VALUE!	NA	#N/A	#N/A
NA	NA	NA	NA	NA	NA	#VALUE!	NA	#N/A	#N/A
NA	NA	NA	NA	NA	NA	#VALUE!	NA	#N/A	#N/A
NA	NA	NA	NA	NA	NA	#VALUE!	NA	#N/A	#N/A
NA	NA	NA	NA	NA	NA	#VALUE!	NA	#N/A	#N/A
NA	NA	NA	NA	NA	NA	#VALUE!	NA	#N/A	#N/A
NA	NA	NA	NA	NA	NA	#VALUE!	NA	#N/A	#N/A
NA	NA	NA	NA	NA	NA	#VALUE!	NA	#N/A	#N/A
NA	NA	NA	NA	NA	NA	#VALUE!	NA	#N/A	#N/A
NA	NA	NA	NA	NA	NA	#VALUE!	NA	#N/A	#N/A
NA	NA	NA	NA	NA	NA	#VALUE!	NA	#N/A	#N/A
NA	NA	NA	NA	NA	NA	#VALUE!	NA	#N/A	#N/A
NA	NA	NA	NA	NA	NA	#VALUE!	NA	#N/A	#N/A
NA	NA	NA	NA	NA	NA	#VALUE!	NA	#N/A	#N/A
NA	NA	NA	NA	NA	NA	#VALUE!	NA	#N/A	#N/A
NA	NA	NA	NA	NA	NA	#VALUE!	NA	#N/A	#N/A
NA	NA	NA	NA	NA	NA	#VALUE!	NA	#N/A	#N/A
NA	NA	NA	NA	NA	NA	#VALUE!	NA	#N/A	#N/A
NA	NA	NA	NA	NA	NA	#VALUE!	NA	#N/A	#N/A
NA	NA	NA	NA	NA	NA	#VALUE!	NA	#N/A	#N/A
NA	NA	NA	NA	NA	NA	#VALUE!	NA	#N/A	#N/A
NA	NA	NA	NA	NA	NA	#VALUE!	NA	#N/A	#N/A
NA	NA	NA	NA	NA	NA	#VALUE!	NA	#N/A	#N/A
NA	NA	NA	NA	NA	NA	#VALUE!	NA	#N/A	#N/A
NA	NA	NA	NA	NA	NA	#VALUE!	NA	#N/A	#N/A
NA	NA	NA	NA	NA	NA	#VALUE!	NA	#N/A	#N/A
NA	NA	NA	NA	NA	NA	#VALUE!	NA	#N/A	#N/A
NA	NA	NA	NA	NA	NA	#VALUE!	NA	#N/A	#N/A
NA	NA	NA	NA	NA	NA	#VALUE!	NA	#N/A	#N/A
NA	NA	NA	NA	NA	NA	#VALUE!	NA	#N/A	#N/A
NA	NA	NA	NA	NA	NA	#VALUE!	NA	#N/A	#N/A
NA	NA	NA	NA	NA	NA	#VALUE!	NA	#N/A	#N/A
NA	NA	NA	NA	NA	NA	#VALUE!	NA	#N/A	#N/A
NA	NA	NA	NA	NA	NA	#VALUE!	NA	#N/A	#N/A
NA	NA	NA	NA	NA	NA	#VALUE!	NA	#N/A	#N/A
NA	NA	NA	NA	NA	NA	#VALUE!	NA	#N/A	#N/A
NA	NA	NA	NA	NA	NA	#VALUE!	NA	#N/A	#N/A
NA	NA	NA	NA	NA	NA	#VALUE!	NA	#N/A	#N/A
NA	NA	NA	NA	NA	NA	#VALUE!	NA	#N/A	#N/A
NA	NA	NA	NA	NA	NA	#VALUE!	NA	#N/A	#N/A
NA	NA	NA	NA	NA	NA	#VALUE!	NA	#N/A	#N/A
NA	NA	NA	NA	NA	NA	#VALUE!	NA	#N/A	#N/A
NA	NA	NA	NA	NA	NA	#VALUE!	NA	#N/A	#N/A
NA	NA	NA	NA	NA	NA	#VALUE!	NA	#N/A	#N/A
NA	NA	NA	NA	NA	NA	#VALUE!	NA	#N/A	#N/A
NA	NA	NA	NA	NA	NA	#VALUE!	NA	#N/A	#N/A
NA	NA	NA	NA	NA	NA	#VALUE!	NA	#N/A	#N/A
NA	NA	NA	NA	NA	NA	#VALUE!	NA	#N/A	#N/A
NA	NA	NA	NA	NA	NA	#VALUE!	NA	#N/A	#N/A
NA	NA	NA	NA	NA	NA	#VALUE!	NA	#N/A	#N/A
NA	NA	NA	NA	NA	NA	#VALUE!	NA	#N/A	#N/A
NA	NA	NA	NA	NA	NA	#VALUE!	NA	#N/A	#N/A
NA	NA	NA	NA	NA	NA	#VALUE!	NA	#N/A	#N/A
NA	NA	NA	NA	NA	NA	#VALUE!	NA	#N/A	#N/A
NA	NA	NA	NA	NA	NA	#VALUE!	NA	#N/A	#N/A
NA	NA	NA	NA	NA	NA	#VALUE!	NA	#N/A	#N/A
NA	NA	NA	NA	NA	NA	#VALUE!	NA	#N/A	#N/A
NA	NA	NA	NA	NA	NA	#VALUE!	NA	#N/A	#N/A
NA	NA	NA	NA	NA	NA	#VALUE!	NA	#N/A	#N/A
NA	NA	NA	NA	NA	NA	#VALUE!	NA	#N/A	#N/A
NA	NA	NA	NA	NA	NA	#VALUE!	NA	#N/A	#N/A
NA	NA	NA	NA	NA	NA	#VALUE!	NA	#N/A	#N/A
NA	NA	NA	NA	NA	NA	#VALUE!	NA	#N/A	#N/A
NA	NA	NA	NA	NA	NA	#VALUE!	NA	#N/A	#N/A
NA	NA	NA	NA	NA	NA	#VALUE!	NA	#N/A	#N/A
NA	NA	NA	NA	NA	NA	#VALUE!	NA	#N/A	#N/A
NA	NA	NA	NA	NA	NA	#VALUE!	NA	#N/A	#N/A
NA	NA	NA	NA	NA	NA	#VALUE!	NA	#N/A	#N/A
NA	NA	NA	NA	NA	NA	#VALUE!	NA	#N/A	#N/A
NA	NA	NA	NA	NA	NA	#VALUE!	NA	#N/A	#N/A
NA	NA	NA	NA	NA	NA	#VALUE!	NA	#N/A	#N/A
NA	NA	NA	NA	NA	NA	#VALUE!	NA	#N/A	#N/A
NA	NA	NA	NA	NA	NA	#VALUE!	NA	#N/A	#N/A
NA	NA	NA	NA	NA	NA	#VALUE!	NA	#N/A	#N/A
NA	NA	NA	NA	NA	NA	#VALUE!	NA	#N/A	#N/A
NA	NA	NA	NA	NA	NA	#VALUE!	NA	#N/A	#N/A
NA	NA	NA	NA	NA	NA	#VALUE!	NA	#N/A	#N/A
NA	NA	NA	NA	NA	NA	#VALUE!	NA	#N/A	#N/A
NA	NA	NA	NA	NA	NA	#VALUE!	NA	#N/A	#N/A
NA	NA	NA	NA	NA	NA	#VALUE!	NA	#N/A	#N/A
NA	NA	NA	NA	NA	NA	#VALUE!	NA	#N/A	#N/A
NA	NA	NA	NA	NA	NA	#VALUE!	NA	#N/A	#N/A
NA	NA	NA	NA	NA	NA	#VALUE!	NA	#N/A	#N/A
NA	NA	NA	NA	NA	NA	#VALUE!	NA	#N/A	#N/A
NA	NA	NA	NA	NA	NA	#VALUE!	NA	#N/A	#N/A
NA	NA	NA	NA	NA	NA	#VALUE!	NA	#N/A	#N/A
NA	NA	NA	NA	NA	NA	#VALUE!	NA	#N/A	#N/A
NA	NA	NA	NA	NA	NA	#VALUE!	NA	#N/A	#N/A
NA	NA	NA	NA	NA	NA	#VALUE!	NA	#N/A	#N/A
NA	NA	NA	NA	NA	NA	#VALUE!	NA	#N/A	#N/A
NA	NA	NA	NA	NA	NA	#VALUE!	NA	#N/A	#N/A
NA	NA	NA	NA	NA	NA	#VALUE!	NA	#N/A	#N/A
NA	NA	NA	NA	NA	NA	#VALUE!	NA	#N/A	#N/A
NA	NA	NA	NA	NA	NA	#VALUE!	NA	#N/A	#N/A
NA	NA	NA	NA	NA	NA	#VALUE!	NA	#N/A	#N/A
NA	NA	NA	NA	NA	NA	#VALUE!	NA	#N/A	#N/A
NA	NA	NA	NA	NA	NA	#VALUE!	NA	#N/A	#N/A
NA	NA	NA	NA	NA	NA	#VALUE!	NA	#N/A	#N/A
NA	NA	NA	NA	NA	NA	#VALUE!	NA	#N/A	#N/A
NA	NA	NA	NA	NA	NA	#VALUE!	NA	#N/A	#N/A
NA	NA	NA	NA	NA	NA	#VALUE!	NA	#N/A	#N/A
NA	NA	NA	NA	NA	NA	#VALUE!	NA	#N/A	#N/A
NA	NA	NA	NA	NA	NA	#VALUE!	NA	#N/A	#N/A
NA	NA	NA	NA	NA	NA	#VALUE!	NA	#N/A	#N/A
NA	NA	NA	NA	NA	NA	#VALUE!	NA	#N/A	#N/A
NA	NA	NA	NA	NA	NA	#VALUE!	NA	#N/A	#N/A
NA	NA	NA	NA	NA	NA	#VALUE!	NA	#N/A	#N/A
NA	NA	NA	NA	NA	NA	#VALUE!	NA	#N/A	#N/A
NA	NA	NA	NA	NA	NA	#VALUE!	NA	#N/A	#N/A
NA	NA	NA	NA	NA	NA	#VALUE!	NA	#N/A	#N/A
NA	NA	NA	NA	NA	NA	#VALUE!	NA	#N/A	#N/A
NA	NA	NA	NA	NA	NA	#VALUE!	NA	#N/A	#N/A
NA	NA	NA	NA	NA	NA	#VALUE!	NA	#N/A	#N/A
NA	NA	NA	NA	NA	NA	#VALUE!	NA	#N/A	#N/A
NA	NA	NA	NA	NA	NA	#VALUE!	NA	#N/A	#N/A
NA	NA	NA	NA	NA	NA	#VALUE!	NA	#N/A	#N/A
NA	NA	NA	NA	NA	NA	#VALUE!	NA	#N/A	#N/A
NA	NA	NA	NA	NA	NA	#VALUE!	NA	#N/A	#N/A
NA	NA	NA	NA	NA	NA	#VALUE!	NA	#N/A	#N/A
NA	NA	NA	NA	NA	NA	#VALUE!	NA	#N/A	#N/A
NA	NA	NA	NA	NA	NA	#VALUE!	NA	#N/A	#N/A
NA	NA	NA	NA	NA	NA	#VALUE!	NA	#N/A	#N/A
NA	NA	NA	NA	NA	NA	#VALUE!	NA	#N/A	#N/A
NA	NA	NA	NA	NA	NA	#VALUE!	NA	#N/A	#N/A
NA	NA	NA	NA	NA	NA	#VALUE!	NA	#N/A	#N/A
NA	NA	NA	NA	NA	NA	#VALUE!	NA	#N/A	#N/A
NA	NA	NA	NA	NA	NA	#VALUE!	NA	#N/A	#N/A
NA	NA	NA	NA	NA	NA	#VALUE!	NA	#N/A	#N/A
NA	NA	NA	NA	NA	NA	#VALUE!	NA	#N/A	#N/A
NA	NA	NA	NA	NA	NA	#VALUE!	NA	#N/A	#N/A
NA	NA	NA	NA	NA	NA	#VALUE!	NA	#N/A	#N/A
NA	NA	NA	NA	NA	NA	#VALUE!	NA	#N/A	#N/A
NA	NA	NA	NA	NA	NA	#VALUE!	NA	#N/A	#N/A
NA	NA	NA	NA	NA	NA	#VALUE!	NA	#N/A	#N/A
NA	NA	NA	NA	NA	NA	#VALUE!	NA	#N/A	#N/A
NA	NA	NA	NA	NA	NA	#VALUE!	NA	#N/A	#N/A
NA	NA	NA	NA	NA	NA	#VALUE!	NA	#N/A	#N/A
NA	NA	NA	NA	NA	NA	#VALUE!	NA	#N/A	#N/A
NA	NA	NA	NA	NA	NA	#VALUE!	NA	#N/A	#N/A
NA	NA	NA	NA	NA	NA	#VALUE!	NA	#N/A	#N/A
NA	NA	NA	NA	NA	NA	#VALUE!	NA	#N/A	#N/A
NA	NA	NA	NA	NA	NA	#VALUE!	NA	#N/A	#N/A
NA	NA	NA	NA	NA	NA	#VALUE!	NA	#N/A	#N/A
NA	NA	NA	NA	NA	NA	#VALUE!	NA	#N/A	#N/A
NA	NA	NA	NA	NA	NA	#VALUE!	NA	#N/A	#N/A
NA	NA	NA	NA	NA	NA	#VALUE!	NA	#N/A	#N/A
NA	NA	NA	NA	NA	NA	#VALUE!	NA	#N/A	#N/A
NA	NA	NA	NA	NA	NA	#VALUE!	NA	#N/A	#N/A
NA	NA	NA	NA	NA	NA	#VALUE!	NA	#N/A	#N/A
NA	NA	NA	NA	NA	NA	#VALUE!	NA	#N/A	#N/A
NA	NA	NA	NA	NA	NA	#VALUE!	NA	#N/A	#N/A
NA	NA	NA	NA	NA	NA	#VALUE!	NA	#N/A	#N/A
NA	NA	NA	NA	NA	NA	#VALUE!	NA	#N/A	#N/A
NA	NA	NA	NA	NA	NA	#VALUE!	NA	#N/A	#N/A
NA	NA	NA	NA	NA	NA	#VALUE!	NA	#N/A	#N/A
NA	NA	NA	NA	NA	NA	#VALUE!	NA	#N/A	#N/A
NA	NA	NA	NA	NA	NA	#VALUE!	NA	#N/A	#N/A
NA	NA	NA	NA	NA	NA	#VALUE!	NA	#N/A	#N/A
NA	NA	NA	NA	NA	NA	#VALUE!	NA	#N/A	#N/A
NA	NA	NA	NA	NA	NA	#VALUE!	NA	#N/A	#N/A
NA	NA	NA	NA	NA	NA	#VALUE!	NA	#N/A	#N/A
NA	NA	NA	NA	NA	NA	#VALUE!	NA	#N/A	#N/A
NA	NA	NA	NA	NA	NA	#VALUE!	NA	#N/A	#N/A
NA	NA	NA	NA	NA	NA	#VALUE!	NA	#N/A	#N/A
NA	NA	NA	NA	NA	NA	#VALUE!	NA	#N/A	#N/A
NA	NA	NA	NA	NA	NA	#VALUE!	NA	#N/A	#N/A
NA	NA	NA	NA	NA	NA	#VALUE!	NA	#N/A	#N/A
NA	NA	NA	NA	NA	NA	#VALUE!	NA	#N/A	#N/A
NA	NA	NA	NA	NA	NA	#VALUE!	NA	#N/A	#N/A
NA	NA	NA	NA	NA	NA	#VALUE!	NA	#N/A	#N/A
NA	NA	NA	NA	NA	NA	#VALUE!	NA	#N/A	#N/A
NA	NA	NA	NA	NA	NA	#VALUE!	NA	#N/A	#N/A
NA	NA	NA	NA	NA	NA	#VALUE!	NA	#N/A	#N/A
NA	NA	NA	NA	NA	NA	#VALUE!	NA	#N/A	#N/A
NA	NA	NA	NA	NA	NA	#VALUE!	NA	#N/A	#N/A
NA	NA	NA	NA	NA	NA	#VALUE!	NA	#N/A	#N/A
NA	NA	NA	NA	NA	NA	#VALUE!	NA	#N/A	#N/A
NA	NA	NA	NA	NA	NA	#VALUE!	NA	#N/A	#N/A
NA	NA	NA	NA	NA	NA	#VALUE!	NA	#N/A	#N/A
NA	NA	NA	NA	NA	NA	#VALUE!	NA	#N/A	#N/A
NA	NA	NA	NA	NA	NA	#VALUE!	NA	#N/A	#N/A
NA	NA	NA	NA	NA	NA	#VALUE!	NA	#N/A	#N/A
NA	NA	NA	NA	NA	NA	#VALUE!	NA	#N/A	#N/A
NA	NA	NA	NA	NA	NA	#VALUE!	NA	#N/A	#N/A
NA	NA	NA	NA	NA	NA	#VALUE!	NA	#N/A	#N/A
NA	NA	NA	NA	NA	NA	#VALUE!	NA	#N/A	#N/A
NA	NA	NA	NA	NA	NA	#VALUE!	NA	#N/A	#N/A
NA	NA	NA	NA	NA	NA	#VALUE!	NA	#N/A	#N/A
NA	NA	NA	NA	NA	NA	#VALUE!	NA	#N/A	#N/A
NA	NA	NA	NA	NA	NA	#VALUE!	NA	#N/A	#N/A
NA	NA	NA	NA	NA	NA	#VALUE!	NA	#N/A	#N/A
NA	NA	NA	NA	NA	NA	#VALUE!	NA	#N/A	#N/A
NA	NA	NA	NA	NA	NA	#VALUE!	NA	#N/A	#N/A
NA	NA	NA	NA	NA	NA	#VALUE!	NA	#N/A	#N/A
NA	NA	NA	NA	NA	NA	#VALUE!	NA	#N/A	#N/A
NA	NA	NA	NA	NA	NA	#VALUE!	NA	#N/A	#N/A
NA	NA	NA	NA	NA	NA	#VALUE!	NA	#N/A	#N/A
NA	NA	NA	NA	NA	NA	#VALUE!	NA	#N/A	#N/A
NA	NA	NA	NA	NA	NA	#VALUE!	NA	#N/A	#N/A
NA	NA	NA	NA	NA	NA	#VALUE!	NA	#N/A	#N/A
NA	NA	NA	NA	NA	NA	#VALUE!	NA	#N/A	#N/A
NA	NA	NA	NA	NA	NA	#VALUE!	NA	#N/A	#N/A
NA	NA	NA	NA	NA	NA	#VALUE!	NA	#N/A	#N/A
NA	NA	NA	NA	NA	NA	#VALUE!	NA	#N/A	#N/A
NA	NA	NA	NA	NA	NA	#VALUE!	NA	#N/A	#N/A
NA	NA	NA	NA	NA	NA	#VALUE!	NA	#N/A	#N/A
NA	NA	NA	NA	NA	NA	#VALUE!	NA	#N/A	#N/A
NA	NA	NA	NA	NA	NA	#VALUE!	NA	#N/A	#N/A
NA	NA	NA	NA	NA	NA	#VALUE!	NA	#N/A	#N/A
NA	NA	NA	NA	NA	NA	#VALUE!	NA	#N/A	#N/A
NA	NA	NA	NA	NA	NA	#VALUE!	NA	#N/A	#N/A
NA	NA	NA	NA	NA	NA	#VALUE!	NA	#N/A	#N/A
NA	NA	NA	NA	NA	NA	#VALUE!	NA	#N/A	#N/A
NA	NA	NA	NA	NA	NA	#VALUE!	NA	#N/A	#N/A
NA	NA	NA	NA	NA	NA	#VALUE!	NA	#N/A	#N/A
NA	NA	NA	NA	NA	NA	#VALUE!	NA	#N/A	#N/A
NA	NA	NA	NA	NA	NA	#VALUE!	NA	#N/A	#N/A
NA	NA	NA	NA	NA	NA	#VALUE!	NA	#N/A	#N/A
NA	NA	NA	NA	NA	NA	#VALUE!	NA	#N/A	#N/A
NA	NA	NA	NA	NA	NA	#VALUE!	NA	#N/A	#N/A
NA	NA	NA	NA	NA	NA	#VALUE!	NA	#N/A	#N/A
NA	NA	NA	NA	NA	NA	#VALUE!	NA	#N/A	#N/A
NA	NA	NA	NA	NA	NA	#VALUE!	NA	#N/A	#N/A
NA	NA	NA	NA	NA	NA	#VALUE!	NA	#N/A	#N/A
NA	NA	NA	NA	NA	NA	#VALUE!	NA	#N/A	#N/A
NA	NA	NA	NA	NA	NA	#VALUE!	NA	#N/A	#N/A
NA	NA	NA	NA	NA	NA	#VALUE!	NA	#N/A	#N/A
NA	NA	NA	NA	NA	NA	#VALUE!	NA	#N/A	#N/A
NA	NA	NA	NA	NA	NA	#VALUE!	NA	#N/A	#N/A
NA	NA	NA	NA	NA	NA	#VALUE!	NA	#N/A	#N/A
NA	NA	NA	NA	NA	NA	#VALUE!	NA	#N/A	#N/A
NA	NA	NA	NA	NA	NA	#VALUE!	NA	#N/A	#N/A
NA	NA	NA	NA	NA	NA	#VALUE!	NA	#N/A	#N/A
NA	NA	NA	NA	NA	NA	#VALUE!	NA	#N/A	#N/A
NA	NA	NA	NA	NA	NA	#VALUE!	NA	#N/A	#N/A
NA	NA	NA	NA	NA	NA	#VALUE!	NA	#N/A	#N/A
NA	NA	NA	NA	NA	NA	#VALUE!	NA	#N/A	#N/A
NA	NA	NA	NA	NA	NA	#VALUE!	NA	#N/A	#N/A
NA	NA	NA	NA	NA	NA	#VALUE!	NA	#N/A	#N/A
NA	NA	NA	NA	NA	NA	#VALUE!	NA	#N/A	#N/A
NA	NA	NA	NA	NA	NA	#VALUE!	NA	#N/A	#N/A
NA	NA	NA	NA	NA	NA	#VALUE!	NA	#N/A	#N/A
NA	NA	NA	NA	NA	NA	#VALUE!	NA	#N/A	#N/A
NA	NA	NA	NA	NA	NA	#VALUE!	NA	#N/A	#N/A
NA	NA	NA	NA	NA	NA	#VALUE!	NA	#N/A	#N/A
NA	NA	NA	NA	NA	NA	#VALUE!	NA	#N/A	#N/A
NA	NA	NA	NA	NA	NA	#VALUE!	NA	#N/A	#N/A
NA	NA	NA	NA	NA	NA	#VALUE!	NA	#N/A	#N/A
NA	NA	NA	NA	NA	NA	#VALUE!	NA	#N/A	#N/A
NA	NA	NA	NA	NA	NA	#VALUE!	NA	#N/A	#N/A
NA	NA	NA	NA	NA	NA	#VALUE!	NA	#N/A	#N/A
NA	NA	NA	NA	NA	NA	#VALUE!	NA	#N/A	#N/A
NA	NA	NA	NA	NA	NA	#VALUE!	NA	#N/A	#N/A
NA	NA	NA	NA	NA	NA	#VALUE!	NA	#N/A	#N/A
NA	NA	NA	NA	NA	NA	#VALUE!	NA	#N/A	#N/A
NA	NA	NA	NA	NA	NA	#VALUE!	NA	#N/A	#N/A
NA	NA	NA	NA	NA	NA	#VALUE!	NA	#N/A	#N/A
NA	NA	NA	NA	NA	NA	#VALUE!	NA	#N/A	#N/A
NA	NA	NA	NA	NA	NA	#VALUE!	NA	#N/A	#N/A
NA	NA	NA	NA	NA	NA	#VALUE!	NA	#N/A	#N/A
NA	NA	NA	NA	NA	NA	#VALUE!	NA	#N/A	#N/A
NA	NA	NA	NA	NA	NA	#VALUE!	NA	#N/A	#N/A
NA	NA	NA	NA	NA	NA	#VALUE!	NA	#N/A	#N/A
NA	NA	NA	NA	NA	NA	#VALUE!	NA	#N/A	#N/A
NA	NA	NA	NA	NA	NA	#VALUE!	NA	#N/A	#N/A
NA	NA	NA	NA	NA	NA	#VALUE!	NA	#N/A	#N/A
NA	NA	NA	NA	NA	NA	#VALUE!	NA	#N/A	#N/A
NA	NA	NA	NA	NA	NA	#VALUE!	NA	#N/A	#N/A
NA	NA	NA	NA	NA	NA	#VALUE!	NA	#N/A	#N/A
NA	NA	NA	NA	NA	NA	#VALUE!	NA	#N/A	#N/A
NA	NA	NA	NA	NA	NA	#VALUE!	NA	#N/A	#N/A
NA	NA	NA	NA	NA	NA	#VALUE!	NA	#N/A	#N/A
NA	NA	NA	NA	NA	NA	#VALUE!	NA	#N/A	#N/A
NA	NA	NA	NA	NA	NA	#VALUE!	NA	#N/A	#N/A
NA	NA	NA	NA	NA	NA	#VALUE!	NA	#N/A	#N/A
NA	NA	NA	NA	NA	NA	#VALUE!	NA	#N/A	#N/A
NA	NA	NA	NA	NA	NA	#VALUE!	NA	#N/A	#N/A
NA	NA	NA	NA	NA	NA	#VALUE!	NA	#N/A	#N/A
NA	NA	NA	NA	NA	NA	#VALUE!	NA	#N/A	#N/A
NA	NA	NA	NA	NA	NA	#VALUE!	NA	#N/A	#N/A
NA	NA	NA	NA	NA	NA	#VALUE!	NA	#N/A	#N/A
NA	NA	NA	NA	NA	NA	#VALUE!	NA	#N/A	#N/A
NA	NA	NA	NA	NA	NA	#VALUE!	NA	#N/A	#N/A
NA	NA	NA	NA	NA	NA	#VALUE!	NA	#N/A	#N/A
NA	NA	NA	NA	NA	NA	#VALUE!	NA	#N/A	#N/A
NA	NA	NA	NA	NA	NA	#VALUE!	NA	#N/A	#N/A
NA	NA	NA	NA	NA	NA	#VALUE!	NA	#N/A	#N/A
NA	NA	NA	NA	NA	NA	#VALUE!	NA	#N/A	#N/A
NA	NA	NA	NA	NA	NA	#VALUE!	NA	#N/A	#N/A
NA	NA	NA	NA	NA	NA	#VALUE!	NA	#N/A	#N/A
NA	NA	NA	NA	NA	NA	#VALUE!	NA	#N/A	#N/A
NA	NA	NA	NA	NA	NA	#VALUE!	NA	#N/A	#N/A
NA	NA	NA	NA	NA	NA	#VALUE!	NA	#N/A	#N/A
NA	NA	NA	NA	NA	NA	#VALUE!	NA	#N/A	#N/A
NA	NA	NA	NA	NA	NA	#VALUE!	NA	#N/A	#N/A
NA	NA	NA	NA	NA	NA	#VALUE!	NA	#N/A	#N/A
NA	NA	NA	NA	NA	NA	#VALUE!	NA	#N/A	#N/A
NA	NA	NA	NA	NA	NA	#VALUE!	NA	#N/A	#N/A
NA	NA	NA	NA	NA	NA	#VALUE!	NA	#N/A	#N/A
NA	NA	NA	NA	NA	NA	#VALUE!	NA	#N/A	#N/A
NA	NA	NA	NA	NA	NA	#VALUE!	NA	#N/A	#N/A
NA	NA	NA	NA	NA	NA	#VALUE!	NA	#N/A	#N/A
NA	NA	NA	NA	NA	NA	#VALUE!	NA	#N/A	#N/A
NA	NA	NA	NA	NA	NA	#VALUE!	NA	#N/A	#N/A
NA	NA	NA	NA	NA	NA	#VALUE!	NA	#N/A	#N/A
NA	NA	NA	NA	NA	NA	#VALUE!	NA	#N/A	#N/A
NA	NA	NA	NA	NA	NA	#VALUE!	NA	#N/A	#N/A
NA	NA	NA	NA	NA	NA	#VALUE!	NA	#N/A	#N/A
NA	NA	NA	NA	NA	NA	#VALUE!	NA	#N/A	#N/A
NA	NA	NA	NA	NA	NA	#VALUE!	NA	#N/A	#N/A
NA	NA	NA	NA	NA	NA	#VALUE!	NA	#N/A	#N/A
NA	NA	NA	NA	NA	NA	#VALUE!	NA	#N/A	#N/A
NA	NA	NA	NA	NA	NA	#VALUE!	NA	#N/A	#N/A
NA	NA	NA	NA	NA	NA	#VALUE!	NA	#N/A	#N/A
NA	NA	NA	NA	NA	NA	#VALUE!	NA	#N/A	#N/A
NA	NA	NA	NA	NA	NA	#VALUE!	NA	#N/A	#N/A
NA	NA	NA	NA	NA	NA	#VALUE!	NA	#N/A	#N/A
NA	NA	NA	NA	NA	NA	#VALUE!	NA	#N/A	#N/A
NA	NA	NA	NA	NA	NA	#VALUE!	NA	#N/A	#N/A
NA	NA	NA	NA	NA	NA	#VALUE!	NA	#N/A	#N/A
NA	NA	NA	NA	NA	NA	#VALUE!	NA	#N/A	#N/A
NA	NA	NA	NA	NA	NA	#VALUE!	NA	#N/A	#N/A
NA	NA	NA	NA	NA	NA	#VALUE!	NA	#N/A	#N/A
NA	NA	NA	NA	NA	NA	#VALUE!	NA	#N/A	#N/A
NA	NA	NA	NA	NA	NA	#VALUE!	NA	#N/A	#N/A
NA	NA	NA	NA	NA	NA	#VALUE!	NA	#N/A	#N/A
NA	NA	NA	NA	NA	NA	#VALUE!	NA	#N/A	#N/A
NA	NA	NA	NA	NA	NA	#VALUE!	NA	#N/A	#N/A
NA	NA	NA	NA	NA	NA	#VALUE!	NA	#N/A	#N/A
NA	NA	NA	NA	NA	NA	#VALUE!	NA	#N/A	#N/A
NA	NA	NA	NA	NA	NA	#VALUE!	NA	#N/A	#N/A
NA	NA	NA	NA	NA	NA	#VALUE!	NA	#N/A	#N/A
NA	NA	NA	NA	NA	NA	#VALUE!	NA	#N/A	#N/A
NA	NA	NA	NA	NA	NA	#VALUE!	NA	#N/A	#N/A
NA	NA	NA	NA	NA	NA	#VALUE!	NA	#N/A	#N/A
NA	NA	NA	NA	NA	NA	#VALUE!	NA	#N/A	#N/A
NA	NA	NA	NA	NA	NA	#VALUE!	NA	#N/A	#N/A
NA	NA	NA	NA	NA	NA	#VALUE!	NA	#N/A	#N/A
NA	NA	NA	NA	NA	NA	#VALUE!	NA	#N/A	#N/A
NA	NA	NA	NA	NA	NA	#VALUE!	NA	#N/A	#N/A
NA	NA	NA	NA	NA	NA	#VALUE!	NA	#N/A	#N/A
NA	NA	NA	NA	NA	NA	#VALUE!	NA	#N/A	#N/A
NA	NA	NA	NA	NA	NA	#VALUE!	NA	#N/A	#N/A
NA	NA	NA	NA	NA	NA	#VALUE!	NA	#N/A	#N/A
NA	NA	NA	NA	NA	NA	#VALUE!	NA	#N/A	#N/A
NA	NA	NA	NA	NA	NA	#VALUE!	NA	#N/A	#N/A
NA	NA	NA	NA	NA	NA	#VALUE!	NA	#N/A	#N/A
NA	NA	NA	NA	NA	NA	#VALUE!	NA	#N/A	#N/A
NA	NA	NA	NA	NA	NA	#VALUE!	NA	#N/A	#N/A
NA	NA	NA	NA	NA	NA	#VALUE!	NA	#N/A	#N/A
NA	NA	NA	NA	NA	NA	#VALUE!	NA	#N/A	#N/A
NA	NA	NA	NA	NA	NA	#VALUE!	NA	#N/A	#N/A
NA	NA	NA	NA	NA	NA	#VALUE!	NA	#N/A	#N/A
NA	NA	NA	NA	NA	NA	#VALUE!	NA	#N/A	#N/A
NA	NA	NA	NA	NA	NA	#VALUE!	NA	#N/A	#N/A
NA	NA	NA	NA	NA	NA	#VALUE!	NA	#N/A	#N/A
NA	NA	NA	NA	NA	NA	#VALUE!	NA	#N/A	#N/A
NA	NA	NA	NA	NA	NA	#VALUE!	NA	#N/A	#N/A
NA	NA	NA	NA	NA	NA	#VALUE!	NA	#N/A	#N/A
NA	NA	NA	NA	NA	NA	#VALUE!	NA	#N/A	#N/A
NA	NA	NA	NA	NA	NA	#VALUE!	NA	#N/A	#N/A
NA	NA	NA	NA	NA	NA	#VALUE!	NA	#N/A	#N/A
NA	NA	NA	NA	NA	NA	#VALUE!	NA	#N/A	#N/A
NA	NA	NA	NA	NA	NA	#VALUE!	NA	#N/A	#N/A
NA	NA	NA	NA	NA	NA	#VALUE!	NA	#N/A	#N/A
NA	NA	NA	NA	NA	NA	#VALUE!	NA	#N/A	#N/A
NA	NA	NA	NA	NA	NA	#VALUE!	NA	#N/A	#N/A
NA	NA	NA	NA	NA	NA	#VALUE!	NA	#N/A	#N/A
NA	NA	NA	NA	NA	NA	#VALUE!	NA	#N/A	#N/A
NA	NA	NA	NA	NA	NA	#VALUE!	NA	#N/A	#N/A
NA	NA	NA	NA	NA	NA	#VALUE!	NA	#N/A	#N/A
NA	NA	NA	NA	NA	NA	#VALUE!	NA	#N/A	#N/A
NA	NA	NA	NA	NA	NA	#VALUE!	NA	#N/A	#N/A
NA	NA	NA	NA	NA	NA	#VALUE!	NA	#N/A	#N/A
NA	NA	NA	NA	NA	NA	#VALUE!	NA	#N/A	#N/A
NA	NA	NA	NA	NA	NA	#VALUE!	NA	#N/A	#N/A
NA	NA	NA	NA	NA	NA	#VALUE!	NA	#N/A	#N/A
NA	NA	NA	NA	NA	NA	#VALUE!	NA	#N/A	#N/A
NA	NA	NA	NA	NA	NA	#VALUE!	NA	#N/A	#N/A
NA	NA	NA	NA	NA	NA	#VALUE!	NA	#N/A	#N/A
NA	NA	NA	NA	NA	NA	#VALUE!	NA	#N/A	#N/A
NA	NA	NA	NA	NA	NA	#VALUE!	NA	#N/A	#N/A
NA	NA	NA	NA	NA	NA	#VALUE!	NA	#N/A	#N/A
NA	NA	NA	NA	NA	NA	#VALUE!	NA	#N/A	#N/A
NA	NA	NA	NA	NA	NA	#VALUE!	NA	#N/A	#N/A
NA	NA	NA	NA	NA	NA	#VALUE!	NA	#N/A	#N/A
NA	NA	NA	NA	NA	NA	#VALUE!	NA	#N/A	#N/A
NA	NA	NA	NA	NA	NA	#VALUE!	NA	#N/A	#N/A
NA	NA	NA	NA	NA	NA	#VALUE!	NA	#N/A	#N/A
NA	NA	NA	NA	NA	NA	#VALUE!	NA	#N/A	#N/A
NA	NA	NA	NA	NA	NA	#VALUE!	NA	#N/A	#N/A
NA	NA	NA	NA	NA	NA	#VALUE!	NA	#N/A	#N/A
NA	NA	NA	NA	NA	NA	#VALUE!	NA	#N/A	#N/A
NA	NA	NA	NA	NA	NA	#VALUE!	NA	#N/A	#N/A
NA	NA	NA	NA	NA	NA	#VALUE!	NA	#N/A	#N/A
NA	NA	NA	NA	NA	NA	#VALUE!	NA	#N/A	#N/A
NA	NA	NA	NA	NA	NA	#VALUE!	NA	#N/A	#N/A
NA	NA	NA	NA	NA	NA	#VALUE!	NA	#N/A	#N/A
NA	NA	NA	NA	NA	NA	#VALUE!	NA	#N/A	#N/A
NA	NA	NA	NA	NA	NA	#VALUE!	NA	#N/A	#N/A
NA	NA	NA	NA	NA	NA	#VALUE!	NA	#N/A	#N/A
NA	NA	NA	NA	NA	NA	#VALUE!	NA	#N/A	#N/A
NA	NA	NA	NA	NA	NA	#VALUE!	NA	#N/A	#N/A
NA	NA	NA	NA	NA	NA	#VALUE!	NA	#N/A	#N/A
NA	NA	NA	NA	NA	NA	#VALUE!	NA	#N/A	#N/A
NA	NA	NA	NA	NA	NA	#VALUE!	NA	#N/A	#N/A
NA	NA	NA	NA	NA	NA	#VALUE!	NA	#N/A	#N/A
NA	NA	NA	NA	NA	NA	#VALUE!	NA	#N/A	#N/A
NA	NA	NA	NA	NA	NA	#VALUE!	NA	#N/A	#N/A
NA	NA	NA	NA	NA	NA	#VALUE!	NA	#N/A	#N/A
NA	NA	NA	NA	NA	NA	#VALUE!	NA	#N/A	#N/A
NA	NA	NA	NA	NA	NA	#VALUE!	NA	#N/A	#N/A
NA	NA	NA	NA	NA	NA	#VALUE!	NA	#N/A	#N/A
NA	NA	NA	NA	NA	NA	#VALUE!	NA	#N/A	#N/A
NA	NA	NA	NA	NA	NA	#VALUE!	NA	#N/A	#N/A
NA	NA	NA	NA	NA	NA	#VALUE!	NA	#N/A	#N/A
NA	NA	NA	NA	NA	NA	#VALUE!	NA	#N/A	#N/A
NA	NA	NA	NA	NA	NA	#VALUE!	NA	#N/A	#N/A
NA	NA	NA	NA	NA	NA	#VALUE!	NA	#N/A	#N/A
NA	NA	NA	NA	NA	NA	#VALUE!	NA	#N/A	#N/A
NA	NA	NA	NA	NA	NA	#VALUE!	NA	#N/A	#N/A
NA	NA	NA	NA	NA	NA	#VALUE!	NA	#N/A	#N/A
NA	NA	NA	NA	NA	NA	#VALUE!	NA	#N/A	#N/A
NA	NA	NA	NA	NA	NA	#VALUE!	NA	#N/A	#N/A
NA	NA	NA	NA	NA	NA	#VALUE!	NA	#N/A	#N/A
NA	NA	NA	NA	NA	NA	#VALUE!	NA	#N/A	#N/A
NA	NA	NA	NA	NA	NA	#VALUE!	NA	#N/A	#N/A
NA	NA	NA	NA	NA	NA	#VALUE!	NA	#N/A	#N/A
NA	NA	NA	NA	NA	NA	#VALUE!	NA	#N/A	#N/A
NA	NA	NA	NA	NA	NA	#VALUE!	NA	#N/A	#N/A
NA	NA	NA	NA	NA	NA	#VALUE!	NA	#N/A	#N/A
NA	NA	NA	NA	NA	NA	#VALUE!	NA	#N/A	#N/A
NA	NA	NA	NA	NA	NA	#VALUE!	NA	#N/A	#N/A
NA	NA	NA	NA	NA	NA	#VALUE!	NA	#N/A	#N/A
NA	NA	NA	NA	NA	NA	#VALUE!	NA	#N/A	#N/A
NA	NA	NA	NA	NA	NA	#VALUE!	NA	#N/A	#N/A
NA	NA	NA	NA	NA	NA	#VALUE!	NA	#N/A	#N/A
NA	NA	NA	NA	NA	NA	#VALUE!	NA	#N/A	#N/A
NA	NA	NA	NA	NA	NA	#VALUE!	NA	#N/A	#N/A
NA	NA	NA	NA	NA	NA	#VALUE!	NA	#N/A	#N/A
NA	NA	NA	NA	NA	NA	#VALUE!	NA	#N/A	#N/A
NA	NA	NA	NA	NA	NA	#VALUE!	NA	#N/A	#N/A
NA	NA	NA	NA	NA	NA	#VALUE!	NA	#N/A	#N/A
NA	NA	NA	NA	NA	NA	#VALUE!	NA	#N/A	#N/A
NA	NA	NA	NA	NA	NA	#VALUE!	NA	#N/A	#N/A
NA	NA	NA	NA	NA	NA	#VALUE!	NA	#N/A	#N/A
NA	NA	NA	NA	NA	NA	#VALUE!	NA	#N/A	#N/A
NA	NA	NA	NA	NA	NA	#VALUE!	NA	#N/A	#N/A
NA	NA	NA	NA	NA	NA	#VALUE!	NA	#N/A	#N/A
NA	NA	NA	NA	NA	NA	#VALUE!	NA	#N/A	#N/A
NA	NA	NA	NA	NA	NA	#VALUE!	NA	#N/A	#N/A
NA	NA	NA	NA	NA	NA	#VALUE!	NA	#N/A	#N/A
NA	NA	NA	NA	NA	NA	#VALUE!	NA	#N/A	#N/A
NA	NA	NA	NA	NA	NA	#VALUE!	NA	#N/A	#N/A
NA	NA	NA	NA	NA	NA	#VALUE!	NA	#N/A	#N/A
NA	NA	NA	NA	NA	NA	#VALUE!	NA	#N/A	#N/A
NA	NA	NA	NA	NA	NA	#VALUE!	NA	#N/A	#N/A
NA	NA	NA	NA	NA	NA	#VALUE!	NA	#N/A	#N/A
NA	NA	NA	NA	NA	NA	#VALUE!	NA	#N/A	#N/A
NA	NA	NA	NA	NA	NA	#VALUE!	NA	#N/A	#N/A
NA	NA	NA	NA	NA	NA	#VALUE!	NA	#N/A	#N/A
NA	NA	NA	NA	NA	NA	#VALUE!	NA	#N/A	#N/A
NA	NA	NA	NA	NA	NA	#VALUE!	NA	#N/A	#N/A
NA	NA	NA	NA	NA	NA	#VALUE!	NA	#N/A	#N/A
NA	NA	NA	NA	NA	NA	#VALUE!	NA	#N/A	#N/A
NA	NA	NA	NA	NA	NA	#VALUE!	NA	#N/A	#N/A
NA	NA	NA	NA	NA	NA	#VALUE!	NA	#N/A	#N/A
NA	NA	NA	NA	NA	NA	#VALUE!	NA	#N/A	#N/A
NA	NA	NA	NA	NA	NA	#VALUE!	NA	#N/A	#N/A
NA	NA	NA	NA	NA	NA	#VALUE!	NA	#N/A	#N/A
NA	NA	NA	NA	NA	NA	#VALUE!	NA	#N/A	#N/A
NA	NA	NA	NA	NA	NA	#VALUE!	NA	#N/A	#N/A
NA	NA	NA	NA	NA	NA	#VALUE!	NA	#N/A	#N/A
NA	NA	NA	NA	NA	NA	#VALUE!	NA	#N/A	#N/A
NA	NA	NA	NA	NA	NA	#VALUE!	NA	#N/A	#N/A
NA	NA	NA	NA	NA	NA	#VALUE!	NA	#N/A	#N/A
NA	NA	NA	NA	NA	NA	#VALUE!	NA	#N/A	#N/A
NA	NA	NA	NA	NA	NA	#VALUE!	NA	#N/A	#N/A
NA	NA	NA	NA	NA	NA	#VALUE!	NA	#N/A	#N/A
NA	NA	NA	NA	NA	NA	#VALUE!	NA	#N/A	#N/A
NA	NA	NA	NA	NA	NA	#VALUE!	NA	#N/A	#N/A
NA	NA	NA	NA	NA	NA	#VALUE!	NA	#N/A	#N/A
NA	NA	NA	NA	NA	NA	#VALUE!	NA	#N/A	#N/A
NA	NA	NA	NA	NA	NA	#VALUE!	NA	#N/A	#N/A
NA	NA	NA	NA	NA	NA	#VALUE!	NA	#N/A	#N/A
NA	NA	NA	NA	NA	NA	#VALUE!	NA	#N/A	#N/A
NA	NA	NA	NA	NA	NA	#VALUE!	NA	#N/A	#N/A
NA	NA	NA	NA	NA	NA	#VALUE!	NA	#N/A	#N/A
NA	NA	NA	NA	NA	NA	#VALUE!	NA	#N/A	#N/A
NA	NA	NA	NA	NA	NA	#VALUE!	NA	#N/A	#N/A
NA	NA	NA	NA	NA	NA	#VALUE!	NA	#N/A	#N/A
NA	NA	NA	NA	NA	NA	#VALUE!	NA	#N/A	#N/A
NA	NA	NA	NA	NA	NA	#VALUE!	NA	#N/A	#N/A
NA	NA	NA	NA	NA	NA	#VALUE!	NA	#N/A	#N/A
NA	NA	NA	NA	NA	NA	#VALUE!	NA	#N/A	#N/A
NA	NA	NA	NA	NA	NA	#VALUE!	NA	#N/A	#N/A
NA	NA	NA	NA	NA	NA	#VALUE!	NA	#N/A	#N/A
NA	NA	NA	NA	NA	NA	#VALUE!	NA	#N/A	#N/A
NA	NA	NA	NA	NA	NA	#VALUE!	NA	#N/A	#N/A
NA	NA	NA	NA	NA	NA	#VALUE!	NA	#N/A	#N/A
NA	NA	NA	NA	NA	NA	#VALUE!	NA	#N/A	#N/A
NA	NA	NA	NA	NA	NA	#VALUE!	NA	#N/A	#N/A
NA	NA	NA	NA	NA	NA	#VALUE!	NA	#N/A	#N/A
NA	NA	NA	NA	NA	NA	#VALUE!	NA	#N/A	#N/A
NA	NA	NA	NA	NA	NA	#VALUE!	NA	#N/A	#N/A
NA	NA	NA	NA	NA	NA	#VALUE!	NA	#N/A	#N/A
NA	NA	NA	NA	NA	NA	#VALUE!	NA	#N/A	#N/A
NA	NA	NA	NA	NA	NA	#VALUE!	NA	#N/A	#N/A
NA	NA	NA	NA	NA	NA	#VALUE!	NA	#N/A	#N/A
NA	NA	NA	NA	NA	NA	#VALUE!	NA	#N/A	#N/A
NA	NA	NA	NA	NA	NA	#VALUE!	NA	#N/A	#N/A
NA	NA	NA	NA	NA	NA	#VALUE!	NA	#N/A	#N/A
NA	NA	NA	NA	NA	NA	#VALUE!	NA	#N/A	#N/A
NA	NA	NA	NA	NA	NA	#VALUE!	NA	#N/A	#N/A
NA	NA	NA	NA	NA	NA	#VALUE!	NA	#N/A	#N/A
NA	NA	NA	NA	NA	NA	#VALUE!	NA	#N/A	#N/A
NA	NA	NA	NA	NA	NA	#VALUE!	NA	#N/A	#N/A
NA	NA	NA	NA	NA	NA	#VALUE!	NA	#N/A	#N/A
NA	NA	NA	NA	NA	NA	#VALUE!	NA	#N/A	#N/A
NA	NA	NA	NA	NA	NA	#VALUE!	NA	#N/A	#N/A
NA	NA	NA	NA	NA	NA	#VALUE!	NA	#N/A	#N/A
NA	NA	NA	NA	NA	NA	#VALUE!	NA	#N/A	#N/A
NA	NA	NA	NA	NA	NA	#VALUE!	NA	#N/A	#N/A
NA	NA	NA	NA	NA	NA	#VALUE!	NA	#N/A	#N/A
NA	NA	NA	NA	NA	NA	#VALUE!	NA	#N/A	#N/A
NA	NA	NA	NA	NA	NA	#VALUE!	NA	#N/A	#N/A
NA	NA	NA	NA	NA	NA	#VALUE!	NA	#N/A	#N/A
NA	NA	NA	NA	NA	NA	#VALUE!	NA	#N/A	#N/A
NA	NA	NA	NA	NA	NA	#VALUE!	NA	#N/A	#N/A
NA	NA	NA	NA	NA	NA	#VALUE!	NA	#N/A	#N/A
NA	NA	NA	NA	NA	NA	#VALUE!	NA	#N/A	#N/A
NA	NA	NA	NA	NA	NA	#VALUE!	NA	#N/A	#N/A
NA	NA	NA	NA	NA	NA	#VALUE!	NA	#N/A	#N/A
NA	NA	NA	NA	NA	NA	#VALUE!	NA	#N/A	#N/A
NA	NA	NA	NA	NA	NA	#VALUE!	NA	#N/A	#N/A
NA	NA	NA	NA	NA	NA	#VALUE!	NA	#N/A	#N/A
NA	NA	NA	NA	NA	NA	#VALUE!	NA	#N/A	#N/A
NA	NA	NA	NA	NA	NA	#VALUE!	NA	#N/A	#N/A
NA	NA	NA	NA	NA	NA	#VALUE!	NA	#N/A	#N/A
NA	NA	NA	NA	NA	NA	#VALUE!	NA	#N/A	#N/A

## Sheet: Table S1d
Table S1d. DPA analysis of transcriptional reponse of E. coli to FNR inactivation: genes that, under anaerobic conditions are down-regulated in FNR- strain compared to FNR+ strain (and thereby induced by FNR in the wild-type)
	gene.index	RP/Rsum	FC:(class1/class2)	pfp	P.value	log(Ratio)	met	FullName	KeggID	COMMENT
cl[c]	516	1	3.1268	0.432	0.0003	1.64469	cl	Chloride	C00115	anion
etoh[c]	712	2	2.7512	0.6425	0.0008	1.46006	etoh	Ethanol	C00469	fermentation product
ca2[c]	476	4	2.2146	0.7722	0.0019	1.14705	ca2	Calcium	C00076	cation
5dglcn[e]	263	11	1.9709	0.8636	0.0057	0.978855	5dglcn	5-Dehydro-D-gluconate	C01062	pentose phosphate pathway
5dglcn[c]	262	11	1.9709	0.8636	0.0057	0.978855	5dglcn	5-Dehydro-D-gluconate	C01062	pentose phosphate pathway
5dglcn[p]	264	11	1.9709	0.8636	0.0057	0.978855	5dglcn	5-Dehydro-D-gluconate	C01062	pentose phosphate pathway
cbl1[p]	486	13.5	1.9131	0.8874	0.0072	0.935912	cbl1	Cob(I)alamin	C00853	cofactor (e.g. anerobic ribonucleotide reductase)
cbl1[c]	484	13.5	1.9131	0.8874	0.0072	0.935912	cbl1	Cob(I)alamin	C00853	cofactor (e.g. anerobic ribonucleotide reductase)
3mop[c]	208	17.5	1.9105	0.9107	0.0096	0.93395	3mop	(S)-3-Methyl-2-oxopentanoate	C00671	Valine, leucine and isoleucine degradation
2dhp[c]	127	17.5	1.9105	0.9107	0.0096	0.93395	2dhp	2-Dehydropantoate	C00966	Pantothenate and CoA biosynthesis
23dhmp[c]	75	21	1.9034	0.9333	0.0118	0.928579	23dhmp	(R)-2,3-Dihydroxy-3-methylpentanoate	C06007	Pantothenate and CoA biosynthesis
3mob[c]	207	23	1.9027	0.9439	0.013	0.928048	3mob	3-Methyl-2-oxobutanoate	C00141	Valine, leucine and isoleucine degradation
2ahbut[c]	112	23	1.9027	0.9439	0.013	0.928048	2ahbut	(S)-2-Aceto-2-hydroxybutanoate	C06006	Valine, leucine and isoleucine degradation
3c3hmp[c]	170	23	1.9027	0.9439	0.013	0.928048	3c3hmp	3-Carboxy-3-hydroxy-4-methylpentanoate	C02504	Pantothenate and CoA biosynthesis
for[c]	765	28.5	1.902	0.9784	0.0167	0.927517	for	Formate	C00058	fermentation product
anhm4p[c]	411	28.5	1.902	0.9784	0.0167	0.927517	anhm4p	1,6-anhydrous-N-Acetylmuramyl-tetrapeptide	0	peptidoglycan synthesis
acser[c]	338	28.5	1.902	0.9784	0.0167	0.927517	acser	O-Acetyl-L-serine	C00979	Cysteine and methionine metabolism
for[p]	767	28.5	1.902	0.9784	0.0167	0.927517	for	Formate	C00058	fermentation product
23dhmb[c]	74	28.5	1.902	0.9784	0.0167	0.927517	23dhmb	(R)-2,3-Dihydroxy-3-methylbutanoate	C04272	Valine, leucine and isoleucine biosynthesis
for[e]	766	28.5	1.902	0.9784	0.0167	0.927517	for	Formate	C00058	fermentation product
alac-S[c]	384	33	1.8819	0.9988	0.0198	0.91219	alac-S	(S)-2-Acetolactate	C06010	Valine, leucine and isoleucine biosynthesis, fermentation
anhgm4p[c]	405	35.5	1.8659	1.0103	0.0215	0.899872	anhgm4p	N-Acetyl-D-glucosamine(anhydrous)N-Acetylmuramyl-tetrapeptide	0	peptidoglycan synthesis
anhgm4p[p]	406	35.5	1.8659	1.0103	0.0215	0.899872	anhgm4p	N-Acetyl-D-glucosamine(anhydrous)N-Acetylmuramyl-tetrapeptide	0	peptidoglycan synthesis
ala-D[c]	375	38.5	1.8645	1.021	0.0236	0.898789	ala-D	D-Alanine	C00133	amino acid
alaala[c]	381	38.5	1.8645	1.021	0.0236	0.898789	alaala	D-Alanyl-D-alanine	C00993	peptidoglycan synthesis
glyclt[p]	910	40.5	1.8623	1.0296	0.025	0.897085	glyclt	Glycolate	C00160	Glyoxylate and dicarboxylate metabolism, fermentation product
glyclt[e]	909	40.5	1.8623	1.0296	0.025	0.897085	glyclt	Glycolate	C00160	Glyoxylate and dicarboxylate metabolism, fermentation product
2amsa[c]	113	43	1.8621	1.0395	0.0268	0.896931	2amsa	2-Aminomalonate semialdehyde	C11822	amino acid metabolism
2ippm[c]	137	54	1.8569	1.0759	0.0348	0.892896	2ippm	2-Isopropylmaleate	C02631	Valine, leucine and isoleucine biosynthesis
acser[e]	339	54	1.8569	1.0759	0.0348	0.892896	acser	O-Acetyl-L-serine	C00979	Cysteine and methionine metabolism
acser[p]	340	54	1.8569	1.0759	0.0348	0.892896	acser	O-Acetyl-L-serine	C00979	Cysteine and methionine metabolism
glu-L[e]	883	54	1.8569	1.0759	0.0348	0.892896	glu-L	L-Glutamate	C00025	amino acid
acg5sa[c]	307	54	1.8569	1.0759	0.0348	0.892896	acg5sa	N-Acetyl-L-glutamate 5-semialdehyde	C01250	Arginine and proline metabolism
acald[e]	301	54	1.8569	1.0759	0.0348	0.892896	acald	Acetaldehyde	C00084	fermentation product
acald[p]	302	54	1.8569	1.0759	0.0348	0.892896	acald	Acetaldehyde	C00084	fermentation product
glu-L[p]	884	54	1.8569	1.0759	0.0348	0.892896	glu-L	L-Glutamate	C00025	amino acid
3c2hmp[c]	169	54	1.8569	1.0759	0.0348	0.892896	3c2hmp	3-Carboxy-2-hydroxy-4-methylpentanoate	C04411	Valine, leucine and isoleucine biosynthesis
acald[c]	300	54	1.8569	1.0759	0.0348	0.892896	acald	Acetaldehyde	C00084	fermentation product
4ppcys[c]	255	63.5	1.8468	1.1048	0.0421	0.885028	4ppcys	N-((R)-4-Phosphopantothenoyl)-L-cysteine	C04352	Pantothenate and CoA biosynthesis
LalaDgluMdapDala[c]	279	71	1.8305	1.1283	0.048	0.872238	LalaDgluMdapDala	L-alanine-D-glutamate-meso-2,6-diaminoheptanedioate-D-alanine	0	peptidoglycan synthesis
anhgm3p[p]	404	71	1.8305	1.1283	0.048	0.872238	anhgm3p	N-Acetyl-D-glucosamine(anhydrous)N-Acetylmuramyl-tripeptide	0	peptidoglycan synthesis
anhgm3p[c]	403	71	1.8305	1.1283	0.048	0.872238	anhgm3p	N-Acetyl-D-glucosamine(anhydrous)N-Acetylmuramyl-tripeptide	0	peptidoglycan synthesis
LalaDgluMdap[c]	282	75	1.827	1.1388	0.0512	0.869477	LalaDgluMdap	L-alanine-D-glutamate-meso-2,6-diaminoheptanedioate	0	peptidoglycan synthesis
LalaDgluMdapDala[p]	281	79	1.8234	1.1431	0.0541	0.866631	LalaDgluMdapDala	L-alanine-D-glutamate-meso-2,6-diaminoheptanedioate-D-alanine	0	peptidoglycan synthesis
LalaDgluMdapDala[e]	280	79	1.8234	1.1431	0.0541	0.866631	LalaDgluMdapDala	L-alanine-D-glutamate-meso-2,6-diaminoheptanedioate-D-alanine	0	peptidoglycan synthesis
cyst-L[c]	582	79	1.8234	1.1431	0.0541	0.866631	cyst-L	L-Cystathionine	C02291	Glycine, serine and threonine metabolism
glyclt[c]	908	79	1.8234	1.1431	0.0541	0.866631	glyclt	Glycolate	C00160	Glyoxylate and dicarboxylate metabolism
LalaLglu[c]	286	79	1.8234	1.1431	0.0541	0.866631	LalaLglu	L-alanine-L-glutamate	0	dipeptide
anhm3p[c]	410	85.5	1.8216	1.166	0.0598	0.865206	anhm3p	1,6-anhydrous-N-Acetylmuramyl-tripeptide	0	peptidoglycan synthesis
co2[c]	529	96.5	1.8181	1.1843	0.0685	0.862432	co2	CO2	C00011	carbon dioxide
co2[e]	530	96.5	1.8181	1.1843	0.0685	0.862432	co2	CO2	C00011	carbon dioxide
glx[c]	887	96.5	1.8181	1.1843	0.0685	0.862432	glx	Glyoxylate	C00048	Glyoxylate and dicarboxylate metabolism
co2[p]	531	96.5	1.8181	1.1843	0.0685	0.862432	co2	CO2	C00011	carbon dioxide
LalaDgluMdap[p]	284	96.5	1.8181	1.1843	0.0685	0.862432	LalaDgluMdap	L-alanine-D-glutamate-meso-2,6-diaminoheptanedioate	0	peptidoglycan synthesis
LalaDglu[c]	285	96.5	1.8181	1.1843	0.0685	0.862432	LalaDglu	L-alanine-D-glutamate	0	dipeptide
LalaDgluMdap[e]	283	96.5	1.8181	1.1843	0.0685	0.862432	LalaDgluMdap	L-alanine-D-glutamate-meso-2,6-diaminoheptanedioate	0	peptidoglycan synthesis
3php[c]	229	123	1.8128	1.2377	0.0913	0.85822	3php	3-Phosphohydroxypyruvate	C03232	Glycine, serine and threonine metabolism
3pg[c]	228	123	1.8128	1.2377	0.0913	0.85822	3pg	3-Phospho-D-glycerate	C00197	Glycolysis / Gluconeogenesis
4ppan[c]	254	123	1.8128	1.2377	0.0913	0.85822	4ppan	D-4'-Phosphopantothenate	C03492	Pantothenate and CoA biosynthesis
glyc-R[p]	904	123	1.8128	1.2377	0.0913	0.85822	glyc-R	(R)-Glycerate	C00258	Glyoxylate and dicarboxylate metabolism, Pentose phosphate pathway, Glycerolipid metabolism
2obut[c]	144	123	1.8128	1.2377	0.0913	0.85822	2obut	2-Oxobutanoate	C00109	amino acid metabolism, Propanoate metabolism
2pg[c]	156	123	1.8128	1.2377	0.0913	0.85822	2pg	D-Glycerate 2-phosphate	C00631	Glyoxylate and dicarboxylate metabolism, Pentose phosphate pathway, Glycerolipid metabolism
glu-D[c]	881	123	1.8128	1.2377	0.0913	0.85822	glu-D	D-Glutamate	C00217	amino acid
glu-L[c]	882	123	1.8128	1.2377	0.0913	0.85822	glu-L	L-Glutamate	C00025	amino acid
glyc-R[c]	902	123	1.8128	1.2377	0.0913	0.85822	glyc-R	(R)-Glycerate	C00258	Glyoxylate and dicarboxylate metabolism, Pentose phosphate pathway, Glycerolipid metabolism
glyc-R[e]	903	123	1.8128	1.2377	0.0913	0.85822	glyc-R	(R)-Glycerate	C00258	Glyoxylate and dicarboxylate metabolism, Pentose phosphate pathway, Glycerolipid metabolism
alaala[p]	383	123	1.8128	1.2377	0.0913	0.85822	alaala	D-Alanyl-D-alanine	C00993	dipeptide
alaala[e]	382	123	1.8128	1.2377	0.0913	0.85822	alaala	D-Alanyl-D-alanine	C00993	dipeptide
2h3oppan[c]	132	123	1.8128	1.2377	0.0913	0.85822	2h3oppan	2-Hydroxy-3-oxopropanoate	C01146	Glyoxylate and dicarboxylate metabolism
ala-D[p]	377	123	1.8128	1.2377	0.0913	0.85822	ala-D	D-Alanine	C00133	amino acid
cpppg3[c]	549	123	1.8128	1.2377	0.0913	0.85822	cpppg3	Coproporphyrinogen III	C03263	heme synthesis
acorn[c]	337	123	1.8128	1.2377	0.0913	0.85822	acorn	N2-Acetyl-L-ornithine	C00437
dxyl5p[c]	692	123	1.8128	1.2377	0.0913	0.85822	dxyl5p	1-deoxy-D-xylulose 5-phosphate	C11437
ala-D[e]	376	123	1.8128	1.2377	0.0913	0.85822	ala-D	D-Alanine	C00133
2dh3dgal6p[c]	123	123	1.8128	1.2377	0.0913	0.85822	2dh3dgal6p	2-Dehydro-3-deoxy-D-galactonate 6-phosphate	C01286
2aobut[c]	114	123	1.8128	1.2377	0.0913	0.85822	2aobut	L-2-Amino-3-oxobutanoate	C03508
4mop[c]	250	123	1.8128	1.2377	0.0913	0.85822	4mop	4-Methyl-2-oxopentanoate	C00233
aact[c]	292	123	1.8128	1.2377	0.0913	0.85822	aact	Aminoacetone	C01888
3c4mop[c]	171	123	1.8128	1.2377	0.0913	0.85822	3c4mop	3-Carboxy-4-methyl-2-oxopentanoate	C04236
athr-L[c]	458	123	1.8128	1.2377	0.0913	0.85822	athr-L	L-Allo-threonine	C05519
15dap[c]	26	143	1.7989	1.2768	0.1095	0.847115	15dap	1,5-Diaminopentane	C01672
15dap[e]	27	143	1.7989	1.2768	0.1095	0.847115	15dap	1,5-Diaminopentane	C01672
15dap[p]	28	143	1.7989	1.2768	0.1095	0.847115	15dap	1,5-Diaminopentane	C01672
5drib[c]	266	146.5	1.7678	1.2783	0.1123	0.821955	5drib	5'-deoxyribose	0
ggptrc[c]	858	149	1.7666	1.2871	0.115	0.820975	ggptrc	gamma-glutamyl-putrescine	0
gg4abut[c]	854	149	1.7666	1.2871	0.115	0.820975	gg4abut	gamma-glutamyl-gamma aminobutyric acid	0
acglu[c]	320	149	1.7666	1.2871	0.115	0.820975	acglu	N-Acetyl-L-glutamate	C00624
gly[c]	888	151	1.7597	1.291	0.1169	0.815329	gly	Glycine	C00037
glu5sa[c]	880	152.5	1.7573	1.2918	0.1181	0.813361	glu5sa	L-Glutamate 5-semialdehyde	C01165
1pyr5c[c]	53	152.5	1.7573	1.2918	0.1181	0.813361	1pyr5c	1-Pyrroline-5-carboxylate	C03912
anhm[c]	412	154	1.7309	1.294	0.1195	0.791522	anhm	1,6-anhydrous-N-Acetylmuramate	0
acg5p[c]	306	156.5	1.7216	1.2985	0.1218	0.78375	acg5p	N-Acetyl-L-glutamyl 5-phosphate	C04133
4abutn[c]	237	156.5	1.7216	1.2985	0.1218	0.78375	4abutn	4-Aminobutanal	C00555
amet[c]	397	159	1.7165	1.302	0.1241	0.77947	amet	S-Adenosyl-L-methionine	C00019
ahcys[c]	365	159	1.7165	1.302	0.1241	0.77947	ahcys	S-Adenosyl-L-homocysteine	C00021
ametam[c]	398	159	1.7165	1.302	0.1241	0.77947	ametam	S-Adenosylmethioninamine	C01137
5aop[c]	258	177.5	1.6909	1.3304	0.1416	0.757791	5aop	5-Amino-4-oxopentanoate	C00430
cit[c]	511	177.5	1.6909	1.3304	0.1416	0.757791	cit	Citrate	C00158
gln-L[c]	874	177.5	1.6909	1.3304	0.1416	0.757791	gln-L	L-Glutamine	C00064
akg[c]	369	177.5	1.6909	1.3304	0.1416	0.757791	akg	2-Oxoglutarate	C00026
glcn[p]	865	177.5	1.6909	1.3304	0.1416	0.757791	glcn	D-Gluconate	C00257
glcn[c]	863	177.5	1.6909	1.3304	0.1416	0.757791	glcn	D-Gluconate	C00257
ala-L[c]	378	177.5	1.6909	1.3304	0.1416	0.757791	ala-L	L-Alanine	C00041
glcn[e]	864	177.5	1.6909	1.3304	0.1416	0.757791	glcn	D-Gluconate	C00257
4abut[e]	235	177.5	1.6909	1.3304	0.1416	0.757791	4abut	4-Aminobutanoate	C00334
akg[p]	371	177.5	1.6909	1.3304	0.1416	0.757791	akg	2-Oxoglutarate	C00026
akg[e]	370	177.5	1.6909	1.3304	0.1416	0.757791	akg	2-Oxoglutarate	C00026
4abut[p]	236	177.5	1.6909	1.3304	0.1416	0.757791	4abut	4-Aminobutanoate	C00334
acglc-D[c]	319	177.5	1.6909	1.3304	0.1416	0.757791	acglc-D	6-Acetyl-D-glucose	C02655
glu1sa[c]	878	177.5	1.6909	1.3304	0.1416	0.757791	glu1sa	L-Glutamate 1-semialdehyde	C03741
23dhdp[c]	73	177.5	1.6909	1.3304	0.1416	0.757791	23dhdp	2,3-Dihydrodipicolinate	C03340
acon-C[c]	334	177.5	1.6909	1.3304	0.1416	0.757791	acon-C	cis-Aconitate	C00417
acon-T[c]	335	177.5	1.6909	1.3304	0.1416	0.757791	acon-T	trans-Aconitate	C02341
dhna[c]	634	191	1.6848	1.3514	0.1547	0.752577	dhna	1,4-Dihydroxy-2-naphthoate	C03657
ggbutal[c]	856	192	1.6847	1.3519	0.1556	0.752492	ggbutal	gamma-glutamyl-gamma-butyraldehyde	0
gtspmd[c]	935	193	1.6781	1.351	0.1563	0.746829	gtspmd	Glutathionylspermidine	C05730
glu5p[c]	879	196	1.6648	1.3563	0.1594	0.735349	glu5p	L-Glutamate 5-phosphate	C03287
2tpr3dpcoa[c]	163	198.5	1.6584	1.359	0.1617	0.729792	2tpr3dpcoa	2'-(5''-triphosphoribosyl)-3'-dephospho-CoA	0
accoa[c]	304	207	1.6528	1.3692	0.1699	0.724912	accoa	Acetyl-CoA	C00024
coa[c]	532	207	1.6528	1.3692	0.1699	0.724912	coa	Coenzyme A	C00010
dpcoa[c]	662	207	1.6528	1.3692	0.1699	0.724912	dpcoa	Dephospho-CoA	C00882
anhgm[c]	407	210.5	1.6526	1.3723	0.1732	0.724738	anhgm	N-Acetyl-D-glucosamine(anhydrous)N-Acetylmuramic acid	0
anhgm[p]	409	210.5	1.6526	1.3723	0.1732	0.724738	anhgm	N-Acetyl-D-glucosamine(anhydrous)N-Acetylmuramic acid	0
anhgm[e]	408	210.5	1.6526	1.3723	0.1732	0.724738	anhgm	N-Acetyl-D-glucosamine(anhydrous)N-Acetylmuramic acid	0
acgam[c]	316	210.5	1.6526	1.3723	0.1732	0.724738	acgam	N-Acetyl-D-glucosamine	C00140
26dap-M[c]	81	214	1.6486	1.3818	0.1773	0.721241	26dap-M	meso-2,6-Diaminoheptanedioate	C00680
aacoa[c]	291	216	1.6472	1.3833	0.1791	0.720016	aacoa	Acetoacetyl-CoA	C00332
acmanap[c]	325	219.5	1.6451	1.3851	0.1823	0.718175	acmanap	N-Acetyl-D-mannosamine 6-phosphate	C04257
acgam6p[c]	315	219.5	1.6451	1.3851	0.1823	0.718175	acgam6p	N-Acetyl-D-glucosamine 6-phosphate	C00357
acmum6p[c]	326	219.5	1.6451	1.3851	0.1823	0.718175	acmum6p	N-acetylmuramate 6-phosphate	0
2shchc[c]	158	224	1.6234	1.3945	0.1873	0.699019	2shchc	2-Succinyl-6-hydroxy-2,4-cyclohexadiene-1-carboxylate	C05817
bglycogen[c]	463	228	1.6131	1.3961	0.1908	0.689836	bglycogen	branching glycogen	0
26dap-LL[c]	80	229	1.6124	1.3959	0.1916	0.68921	26dap-LL	LL-2,6-Diaminoheptanedioate	C00666
N1aspmd[c]	287	235	1.6106	1.4023	0.1976	0.687598	N1aspmd	N1-Acetylspermidine	C00612
2dmmq8[c]	128	243	1.6001	1.41	0.2054	0.678162	2dmmq8	2-Demethylmenaquinone 8	C05818
acgam1p[c]	312	244.5	1.5974	1.4108	0.2068	0.675726	acgam1p	N-Acetyl-D-glucosamine 1-phosphate	C04256
arg-L[p]	439	249.5	1.5938	1.4168	0.2119	0.672471	arg-L	L-Arginine	C00062
arg-L[e]	438	249.5	1.5938	1.4168	0.2119	0.672471	arg-L	L-Arginine	C00062
arg-L[c]	437	249.5	1.5938	1.4168	0.2119	0.672471	arg-L	L-Arginine	C00062
citr-L[c]	514	249.5	1.5938	1.4168	0.2119	0.672471	citr-L	L-Citrulline	C00327
glucys[c]	885	255	1.5829	1.4194	0.217	0.66257	glucys	gamma-L-Glutamyl-L-cysteine	C00669
gthox[c]	926	259.5	1.58	1.4271	0.222	0.659925	gthox	Oxidized glutathione	C00127
cgly[c]	503	259.5	1.58	1.4271	0.222	0.659925	cgly	Cys-Gly	C01419
cys-L[c]	579	259.5	1.58	1.4271	0.222	0.659925	cys-L	L-Cysteine	C00097
gthrd[c]	929	259.5	1.58	1.4271	0.222	0.659925	gthrd	Reduced glutathione	C00051
cys-L[p]	581	282.5	1.5771	1.4473	0.2451	0.657274	cys-L	L-Cysteine	C00097
actp[c]	342	282.5	1.5771	1.4473	0.2451	0.657274	actp	Acetyl phosphate	C00227
2dmmql8[c]	129	282.5	1.5771	1.4473	0.2451	0.657274	2dmmql8	2-Demethylmenaquinol 8	0
ac[c]	294	282.5	1.5771	1.4473	0.2451	0.657274	ac	Acetate	C00033
ac[e]	295	282.5	1.5771	1.4473	0.2451	0.657274	ac	Acetate	C00033
agm[c]	362	282.5	1.5771	1.4473	0.2451	0.657274	agm	Agmatine	C00179
aspsa[c]	456	282.5	1.5771	1.4473	0.2451	0.657274	aspsa	L-Aspartate 4-semialdehyde	C00441
glycogen[c]	911	282.5	1.5771	1.4473	0.2451	0.657274	glycogen	glycogen	C00182
ac[p]	296	282.5	1.5771	1.4473	0.2451	0.657274	ac	Acetate	C00033
glc-D[e]	861	282.5	1.5771	1.4473	0.2451	0.657274	glc-D	D-Glucose	C00031
glc-D[p]	862	282.5	1.5771	1.4473	0.2451	0.657274	glc-D	D-Glucose	C00031
4abut[c]	234	282.5	1.5771	1.4473	0.2451	0.657274	4abut	4-Aminobutanoate	C00334
gthrd[e]	930	282.5	1.5771	1.4473	0.2451	0.657274	gthrd	Reduced glutathione	C00051
agm[e]	363	282.5	1.5771	1.4473	0.2451	0.657274	agm	Agmatine	C00179
agm[p]	364	282.5	1.5771	1.4473	0.2451	0.657274	agm	Agmatine	C00179
gthrd[p]	931	282.5	1.5771	1.4473	0.2451	0.657274	gthrd	Reduced glutathione	C00051
alltn[e]	391	282.5	1.5771	1.4473	0.2451	0.657274	alltn	Allantoin	C01551
alltn[p]	392	282.5	1.5771	1.4473	0.2451	0.657274	alltn	Allantoin	C01551
fe2[e]	728	282.5	1.5771	1.4473	0.2451	0.657274	fe2	Fe2+	C00023
fe3[p]	732	282.5	1.5771	1.4473	0.2451	0.657274	fe3	Fe3+	0
fe2[p]	729	282.5	1.5771	1.4473	0.2451	0.657274	fe2	Fe2+	C00023
fe3[e]	731	282.5	1.5771	1.4473	0.2451	0.657274	fe3	Fe3+	0
feenter[c]	750	282.5	1.5771	1.4473	0.2451	0.657274	feenter	Fe-enterobactin	C06230
cys-L[e]	580	282.5	1.5771	1.4473	0.2451	0.657274	cys-L	L-Cysteine	C00097
frulysp[c]	777	282.5	1.5771	1.4473	0.2451	0.657274	frulysp	fructoselysine Phosphate	0
alltn[c]	390	282.5	1.5771	1.4473	0.2451	0.657274	alltn	Allantoin	C01551
fru[c]	771	282.5	1.5771	1.4473	0.2451	0.657274	fru	D-Fructose	C00095
dad-5[c]	590	282.5	1.5771	1.4473	0.2451	0.657274	dad-5	5'-Deoxyadenosine	C05198
argsuc[c]	440	304.5	1.5677	1.4633	0.2671	0.64865	argsuc	N(omega)-(L-Arginino)succinate	C03406
dtdpglu[c]	678	311.5	1.5584	1.468	0.2742	0.640066	dtdpglu	dTDPglucose	C00842
dtdp4addg[c]	674	311.5	1.5584	1.468	0.2742	0.640066	dtdp4addg	dTDP-4-amino-4,6-dideoxy-D-galactose	C04268
dtdp4d6dm[c]	676	311.5	1.5584	1.468	0.2742	0.640066	dtdp4d6dm	dTDP-4-dehydro-6-deoxy-L-mannose	C00688
dtdp4d6dg[c]	675	311.5	1.5584	1.468	0.2742	0.640066	dtdp4d6dg	dTDP-4-dehydro-6-deoxy-D-glucose	C00687
dtdprmn[c]	679	311.5	1.5584	1.468	0.2742	0.640066	dtdprmn	dTDP-L-rhamnose	C03319
eca3und[p]	696	318	1.5407	1.4733	0.2809	0.623586	eca3und	(enterobacterial common antigen)x3 undecaprenyl-diphosphate	0
eca4und[p]	699	318	1.5407	1.4733	0.2809	0.623586	eca4und	(enterobacterial common antigen)x4 undecaprenyl-diphosphate	0
eca2und[p]	695	318	1.5407	1.4733	0.2809	0.623586	eca2und	(enterobacterial common antigen)x2 undecaprenyl-diphosphate	0
dd2coa[c]	613	331	1.5394	1.4851	0.2947	0.622368	dd2coa	trans-Dodec-2-enoyl-CoA	C03221
3hocoa[c]	197	331	1.5394	1.4851	0.2947	0.622368	3hocoa	(S)-3-Hydroxyoctanoyl-CoA	C05266
3oddcoa[c]	214	331	1.5394	1.4851	0.2947	0.622368	3oddcoa	3-Oxododecanoyl-CoA	C05263
3hbcoa[c]	181	331	1.5394	1.4851	0.2947	0.622368	3hbcoa	(S)-3-Hydroxybutanoyl-CoA	C01144
3ohcoa[c]	217	331	1.5394	1.4851	0.2947	0.622368	3ohcoa	3-Oxohexanoyl-CoA	C05269
3oocoa[c]	221	331	1.5394	1.4851	0.2947	0.622368	3oocoa	3-Oxooctanoyl-CoA	C05267
dc2coa[c]	598	331	1.5394	1.4851	0.2947	0.622368	dc2coa	trans-Dec-2-enoyl-CoA	C05275
aps[c]	424	331	1.5394	1.4851	0.2947	0.622368	aps	Adenosine 5'-phosphosulfate	C00224
dcacoa[c]	603	331	1.5394	1.4851	0.2947	0.622368	dcacoa	Decanoyl-CoA (n-C10:0CoA)	C05274
23dhbzs[c]	72	331	1.5394	1.4851	0.2947	0.622368	23dhbzs	2,3-dihydroxybenzoylserine	0
3hdcoa[c]	189	331	1.5394	1.4851	0.2947	0.622368	3hdcoa	(S)-3-Hydroxydecanoyl-CoA	C05264
3hddcoa[c]	190	331	1.5394	1.4851	0.2947	0.622368	3hddcoa	(S)-3-Hydroxydodecanoyl-CoA	C05262
alltt[c]	393	331	1.5394	1.4851	0.2947	0.622368	alltt	Allantoate	C00499
4mpetz[c]	251	331	1.5394	1.4851	0.2947	0.622368	4mpetz	4-Methyl-5-(2-phosphoethyl)-thiazole	C04327
3hhcoa[c]	193	331	1.5394	1.4851	0.2947	0.622368	3hhcoa	(S)-3-Hydroxyhexanoyl-CoA	C05268
b2coa[c]	460	331	1.5394	1.4851	0.2947	0.622368	b2coa	Crotonoyl-CoA	C00877
3odcoa[c]	213	331	1.5394	1.4851	0.2947	0.622368	3odcoa	3-Oxodecanoyl-CoA	C05265
fe3[c]	730	346	1.532	1.4937	0.3099	0.615416	fe3	Fe3+	0
fe2[c]	727	346	1.532	1.4937	0.3099	0.615416	fe2	Fe2+	C00023
dtdp4aaddg[c]	673	351.5	1.5302	1.4995	0.316	0.61372	dtdp4aaddg	dTDP-4-acetamido-4,6-dideoxy-D-galactose	0
dtmp[c]	680	351.5	1.5302	1.4995	0.316	0.61372	dtmp	dTMP	C00364
dtdp[c]	677	351.5	1.5302	1.4995	0.316	0.61372	dtdp	dTDP	C00363
enter[p]	705	371.5	1.5025	1.5081	0.3359	0.587365	enter	Enterochelin	0
enter[e]	704	371.5	1.5025	1.5081	0.3359	0.587365	enter	Enterochelin	0
cgly[e]	504	371.5	1.5025	1.5081	0.3359	0.587365	cgly	Cys-Gly	C01419
dttp[c]	683	371.5	1.5025	1.5081	0.3359	0.587365	dttp	dTTP	C00459
feenter[p]	752	371.5	1.5025	1.5081	0.3359	0.587365	feenter	Fe-enterobactin	C06230
adpglc[c]	355	371.5	1.5025	1.5081	0.3359	0.587365	adpglc	ADPglucose	C00498
asn-L[e]	446	371.5	1.5025	1.5081	0.3359	0.587365	asn-L	L-Asparagine	C00152
asp-L[e]	454	371.5	1.5025	1.5081	0.3359	0.587365	asp-L	L-Aspartate	C00049
btcoa[c]	465	371.5	1.5025	1.5081	0.3359	0.587365	btcoa	Butanoyl-CoA	C00136
enter[c]	703	371.5	1.5025	1.5081	0.3359	0.587365	enter	Enterochelin	0
asp-L[p]	455	371.5	1.5025	1.5081	0.3359	0.587365	asp-L	L-Aspartate	C00049
feenter[e]	751	371.5	1.5025	1.5081	0.3359	0.587365	feenter	Fe-enterobactin	C06230
asn-L[p]	447	371.5	1.5025	1.5081	0.3359	0.587365	asn-L	L-Asparagine	C00152
cgly[p]	505	371.5	1.5025	1.5081	0.3359	0.587365	cgly	Cys-Gly	C01419
3htdcoa[c]	205	391.5	1.5006	1.5174	0.3561	0.585539	3htdcoa	(S)-3-Hydroxytetradecanoyl-CoA	C05260
ddcacoa[c]	618	391.5	1.5006	1.5174	0.3561	0.585539	ddcacoa	Dodecanoyl-CoA (n-C12:0CoA)	C01832
dnad[c]	659	401	1.5002	1.5216	0.3658	0.585155	dnad	Deamino-NAD+	C00857
3hhdcoa[c]	194	413.5	1.4982	1.5262	0.3783	0.58323	3hhdcoa	(S)-3-Hydroxyhexadecanoyl-CoA	C05258
3hodcoa[c]	200	413.5	1.4982	1.5262	0.3783	0.58323	3hodcoa	(S)-3-Hydroxyoctadecanoyl-CoA	0
3ohdcoa[c]	218	413.5	1.4982	1.5262	0.3783	0.58323	3ohdcoa	3-Oxohexadecanoyl-CoA	C05259
3otdcoa[c]	227	413.5	1.4982	1.5262	0.3783	0.58323	3otdcoa	3-Oxotetradecanoyl-CoA	C05261
3oodcoa[c]	224	413.5	1.4982	1.5262	0.3783	0.58323	3oodcoa	3-Oxooctadecanoyl-CoA	0
gdpofuc[c]	851	428.5	1.4978	1.5314	0.3934	0.582845	gdpofuc	GDP-4-oxo-L-fucose	0
dudp[c]	684	428.5	1.4978	1.5314	0.3934	0.582845	dudp	dUDP	C01346
dump[c]	685	428.5	1.4978	1.5314	0.3934	0.582845	dump	dUMP	C00365
gdpddman[c]	848	428.5	1.4978	1.5314	0.3934	0.582845	gdpddman	GDP-4-dehydro-6-deoxy-D-mannose	C01222
gdpfuc[c]	849	428.5	1.4978	1.5314	0.3934	0.582845	gdpfuc	GDP-L-fucose	C00325
gdpmann[c]	850	428.5	1.4978	1.5314	0.3934	0.582845	gdpmann	GDP-D-mannose	C00096
adprib[c]	358	428.5	1.4978	1.5314	0.3934	0.582845	adprib	ADPribose	C00301
eig3p[c]	700	428.5	1.4978	1.5314	0.3934	0.582845	eig3p	D-erythro-1-(Imidazol-4-yl)glycerol 3-phosphate	C04666
23dhba[c]	71	428.5	1.4978	1.5314	0.3934	0.582845	23dhba	(2,3-Dihydroxybenzoyl)adenylate	C04030
cbp[c]	487	428.5	1.4978	1.5314	0.3934	0.582845	cbp	Carbamoyl phosphate	C00169
cytd[e]	585	448.5	1.4898	1.5377	0.4135	0.575119	cytd	Cytidine	C00475
cytd[p]	586	448.5	1.4898	1.5377	0.4135	0.575119	cytd	Cytidine	C00475
cytd[c]	584	448.5	1.4898	1.5377	0.4135	0.575119	cytd	Cytidine	C00475
din[c]	645	448.5	1.4898	1.5377	0.4135	0.575119	din	Deoxyinosine	C05512
csn[c]	557	463	1.4881	1.5397	0.4274	0.573471	csn	Cytosine	C00380
gua[c]	936	463	1.4881	1.5397	0.4274	0.573471	gua	Guanine	C00242
ade[e]	344	463	1.4881	1.5397	0.4274	0.573471	ade	Adenine	C00147
ade[p]	345	463	1.4881	1.5397	0.4274	0.573471	ade	Adenine	C00147
gua[e]	937	463	1.4881	1.5397	0.4274	0.573471	gua	Guanine	C00242
dscl[c]	671	471	1.4713	1.5441	0.436	0.557091	dscl	dihydrosirohydrochlorin	C02463
dctp[c]	609	476.5	1.4691	1.5452	0.4414	0.554933	dctp	dCTP	C00458
cdp[c]	493	476.5	1.4691	1.5452	0.4414	0.554933	cdp	CDP	C00112
dcmp[c]	606	476.5	1.4691	1.5452	0.4414	0.554933	dcmp	dCMP	C00239
cmp[c]	526	476.5	1.4691	1.5452	0.4414	0.554933	cmp	CMP	C00055
dutp[c]	691	476.5	1.4691	1.5452	0.4414	0.554933	dutp	dUTP	C00460
ctp[c]	563	476.5	1.4691	1.5452	0.4414	0.554933	ctp	CTP	C00063
dcdp[c]	605	476.5	1.4691	1.5452	0.4414	0.554933	dcdp	dCDP	C00705
dcyt[c]	610	483.5	1.4652	1.5499	0.4493	0.551098	dcyt	Deoxycytidine	C00881
duri[c]	688	483.5	1.4652	1.5499	0.4493	0.551098	duri	Deoxyuridine	C00526
10fthf[c]	1	486	1.4639	1.5482	0.4511	0.549817	10fthf	10-Formyltetrahydrofolate	C00234
ditp[c]	648	502	1.4612	1.5518	0.467	0.547154	ditp	dITP	C01345
4pasp[c]	252	502	1.4612	1.5518	0.467	0.547154	4pasp	4-Phospho-L-aspartate	C03082
fprica[c]	769	502	1.4612	1.5518	0.467	0.547154	fprica	5-Formamido-1-(5-phospho-D-ribosyl)imidazole-4-carboxamide	C04734
dimp[c]	642	502	1.4612	1.5518	0.467	0.547154	dimp	dIMP	C06196
adp[c]	354	502	1.4612	1.5518	0.467	0.547154	adp	ADP	C00008
gmp[c]	916	502	1.4612	1.5518	0.467	0.547154	gmp	GMP	C00144
gdp[c]	845	502	1.4612	1.5518	0.467	0.547154	gdp	GDP	C00035
g1p[c]	787	502	1.4612	1.5518	0.467	0.547154	g1p	D-Glucose 1-phosphate	C00103
amp[c]	400	502	1.4612	1.5518	0.467	0.547154	amp	AMP	C00020
datp[c]	596	502	1.4612	1.5518	0.467	0.547154	datp	dATP	C00131
dgdp[c]	619	502	1.4612	1.5518	0.467	0.547154	dgdp	dGDP	C00361
dgmp[c]	620	502	1.4612	1.5518	0.467	0.547154	dgmp	dGMP	C00362
atp[c]	459	502	1.4612	1.5518	0.467	0.547154	atp	ATP	C00002
dcamp[c]	604	502	1.4612	1.5518	0.467	0.547154	dcamp	N6-(1,2-Dicarboxyethyl)-AMP	C03794
gal1p[c]	810	502	1.4612	1.5518	0.467	0.547154	gal1p	alpha-D-Galactose 1-phosphate	C00446
dadp[c]	591	502	1.4612	1.5518	0.467	0.547154	dadp	dADP	C00206
damp[c]	592	502	1.4612	1.5518	0.467	0.547154	damp	dAMP	C00360
didp[c]	641	502	1.4612	1.5518	0.467	0.547154	didp	dIDP	C01344
2mcit[c]	141	517.5	1.4608	1.5525	0.4817	0.546759	2mcit	2-Methylcitrate	C02225
2mcacn[c]	140	517.5	1.4608	1.5525	0.4817	0.546759	2mcacn	cis-2-Methylaconitate	C04225
gtp[c]	932	520.5	1.4564	1.5531	0.4847	0.542407	gtp	GTP	C00044
gdptp[c]	852	520.5	1.4564	1.5531	0.4847	0.542407	gdptp	Guanosine 3'-diphosphate 5'-triphosphate	C04494
ade[c]	343	526	1.4513	1.5532	0.4898	0.537346	ade	Adenine	C00147
adn[e]	347	528	1.4505	1.5547	0.4921	0.53655	adn	Adenosine	C00212
adn[p]	348	528	1.4505	1.5547	0.4921	0.53655	adn	Adenosine	C00212
adn[c]	346	528	1.4505	1.5547	0.4921	0.53655	adn	Adenosine	C00212
cdpdtdecg[c]	500	533	1.447	1.554	0.4966	0.533065	cdpdtdecg	CDP-1,2-ditetradecanoylglycerol	C00269
cdpdodecg[c]	498	533	1.447	1.554	0.4966	0.533065	cdpdodecg	CDP-1,2-dioctadecanoylglycerol	C00269
cdpdtdec7eg[c]	499	533	1.447	1.554	0.4966	0.533065	cdpdtdec7eg	CDP-1,2-ditetradec-7-enoylglycerol	C00269
cdpdodec11eg[c]	497	533	1.447	1.554	0.4966	0.533065	cdpdodec11eg	CDP-1,2-dioctadec-11-enoylglycerol	C00269
cdpdddecg[c]	494	533	1.447	1.554	0.4966	0.533065	cdpdddecg	CDP-1,2-didodecanoylglycerol	C00269
cdpdhdec9eg[c]	495	533	1.447	1.554	0.4966	0.533065	cdpdhdec9eg	CDP-1,2-dihexadec-9-enoylglycerol	C00269
cdpdhdecg[c]	496	533	1.447	1.554	0.4966	0.533065	cdpdhdecg	CDP-1,2-dihexadecanoylglycerol	C00269
dad-2[c]	587	537	1.4444	1.5545	0.5005	0.53047	dad-2	Deoxyadenosine	C00559
34hpp[c]	166	538	1.4435	1.5541	0.5013	0.529571	34hpp	3-(4-Hydroxyphenyl)pyruvate	C01179
dhor-S[c]	636	542	1.441	1.5548	0.5052	0.52707	dhor-S	(S)-Dihydroorotate	C00337
2p4c2me[c]	155	542	1.441	1.5548	0.5052	0.52707	2p4c2me	2-phospho-4-(cytidine 5'-diphospho)-2-C-methyl-D-erythritol	0
cbasp[c]	480	542	1.441	1.5548	0.5052	0.52707	cbasp	N-Carbamoyl-L-aspartate	C00438
4c2me[c]	242	542	1.441	1.5548	0.5052	0.52707	4c2me	4-(cytidine 5'-diphospho)-2-C-methyl-D-erythritol	C11435
ckdo[c]	515	542	1.441	1.5548	0.5052	0.52707	ckdo	CMP-3-deoxy-D-manno-octulosonate	0
aconm[c]	336	548	1.4408	1.555	0.5109	0.52687	aconm	E-3-carboxy-2-pentenedioate 6-methyl ester	0
dha[c]	627	556.5	1.4375	1.5547	0.5187	0.523562	dha	Dihydroxyacetone	C00184
dha[p]	629	556.5	1.4375	1.5547	0.5187	0.523562	dha	Dihydroxyacetone	C00184
glc-D[c]	860	556.5	1.4375	1.5547	0.5187	0.523562	glc-D	D-Glucose	C00031
gal[c]	815	556.5	1.4375	1.5547	0.5187	0.523562	gal	D-Galactose	C00124
dha[e]	628	556.5	1.4375	1.5547	0.5187	0.523562	dha	Dihydroxyacetone	C00184
enlipa[p]	702	563.5	1.4264	1.5568	0.5259	0.512379	enlipa	phosphoethanolamine KDO(2)-lipid (A)	0
enlipa[e]	701	563.5	1.4264	1.5568	0.5259	0.512379	enlipa	phosphoethanolamine KDO(2)-lipid (A)	0
6hmhptpp[c]	274	581.5	1.4254	1.5569	0.5428	0.511367	6hmhptpp	6-hydroxymethyl-dihydropterin pyrophosphate	0
cpe180[c]	540	581.5	1.4254	1.5569	0.5428	0.511367	cpe180	cyclopropane phosphatidylethanolamine (dioctadec-11,12-cyclo-anoyl, n-C18:0 cyclo)	0
cpg160[c]	541	581.5	1.4254	1.5569	0.5428	0.511367	cpg160	cyclopropane phosphatidylglycerol (dihexadec-9,10-cyclo-anoyl, n-C16:0 cyclo)	0
cpg180[c]	542	581.5	1.4254	1.5569	0.5428	0.511367	cpg180	cyclopropane phosphatidylglycerol (dioctadec-11,12-cyclo-anoyl, n-C18:0 cyclo)	0
dgtp[c]	626	581.5	1.4254	1.5569	0.5428	0.511367	dgtp	dGTP	C00286
etha[p]	708	581.5	1.4254	1.5569	0.5428	0.511367	etha	Ethanolamine	C00189
g3pg[c]	797	581.5	1.4254	1.5569	0.5428	0.511367	g3pg	Glycerophosphoglycerol	C03274
g3pe[c]	794	581.5	1.4254	1.5569	0.5428	0.511367	g3pe	sn-Glycero-3-phosphoethanolamine	C01233
gam1p[c]	833	581.5	1.4254	1.5569	0.5428	0.511367	gam1p	D-Glucosamine 1-phosphate	C06156
adphep-DD[c]	356	581.5	1.4254	1.5569	0.5428	0.511367	adphep-DD	ADP-D-glycero-D-manno-heptose	C06397
apg160[c]	419	581.5	1.4254	1.5569	0.5428	0.511367	apg160	acyl phosphatidylglycerol (n-C16:0)	0
apg161[c]	420	581.5	1.4254	1.5569	0.5428	0.511367	apg161	acyl phosphatidylglycerol (n-C16:1)	0
cpe160[c]	539	581.5	1.4254	1.5569	0.5428	0.511367	cpe160	cyclopropane phosphatidylethanolamine (dihexadec-9,10-cyclo-anoyl, n-C16:0 cyclo)	0
etha[e]	707	581.5	1.4254	1.5569	0.5428	0.511367	etha	Ethanolamine	C00189
gam6p[c]	834	581.5	1.4254	1.5569	0.5428	0.511367	gam6p	D-Glucosamine 6-phosphate	C00352
glyc3p[e]	900	581.5	1.4254	1.5569	0.5428	0.511367	glyc3p	Glycerol 3-phosphate	C00093
glyc3p[p]	901	581.5	1.4254	1.5569	0.5428	0.511367	glyc3p	Glycerol 3-phosphate	C00093
camp[c]	479	581.5	1.4254	1.5569	0.5428	0.511367	camp	cAMP	C00575
gmhep7p[c]	915	581.5	1.4254	1.5569	0.5428	0.511367	gmhep7p	D-Glycero-D-manno-heptose 7-phosphate	C07836
fad[c]	719	581.5	1.4254	1.5569	0.5428	0.511367	fad	Flavin adenine dinucleotide oxidized	C00016
fadh2[c]	720	581.5	1.4254	1.5569	0.5428	0.511367	fadh2	Flavin adenine dinucleotide reduced	C01352
g3pg[e]	798	602	1.4242	1.5539	0.5608	0.510152	g3pg	Glycerophosphoglycerol	C03274
2tdecg3p[c]	161	602	1.4242	1.5539	0.5608	0.510152	2tdecg3p	2-tetradecanoyl-sn-glycerol 3-phosphate	C03974
g3pg[p]	799	602	1.4242	1.5539	0.5608	0.510152	g3pg	Glycerophosphoglycerol	C03274
g3pe[e]	795	602	1.4242	1.5539	0.5608	0.510152	g3pe	sn-Glycero-3-phosphoethanolamine	C01233
g3pe[p]	796	602	1.4242	1.5539	0.5608	0.510152	g3pe	sn-Glycero-3-phosphoethanolamine	C01233
2odec11eg3p[c]	145	602	1.4242	1.5539	0.5608	0.510152	2odec11eg3p	2-octadec-11-enoyl-sn-glycerol 3-phosphate	C03974
2odecg3p[c]	147	602	1.4242	1.5539	0.5608	0.510152	2odecg3p	2-octadecanoyl-sn-glycerol 3-phosphate	C03974
2tdec7eg3p[c]	159	602	1.4242	1.5539	0.5608	0.510152	2tdec7eg3p	2-tetradec-7-enoyl-sn-glycerol 3-phosphate	C03974
2hdecg3p[c]	135	602	1.4242	1.5539	0.5608	0.510152	2hdecg3p	2-hexadecanoyl-sn-glycerol 3-phosphate	C03974
2ddecg3p[c]	117	602	1.4242	1.5539	0.5608	0.510152	2ddecg3p	2-dodecanoyl-sn-glycerol 3-phosphate	C03974
2hdec9eg3p[c]	133	602	1.4242	1.5539	0.5608	0.510152	2hdec9eg3p	2-hexadec-9-enoyl-sn-glycerol 3-phosphate	C03974
2agpg140[c]	100	628	1.423	1.5526	0.5845	0.508936	2agpg140	2-Acyl-sn-glycero-3-phosphoglycerol (n-C14:0)	0
1tdecg3p[p]	57	628	1.423	1.5526	0.5845	0.508936	1tdecg3p	1-tetradecanoyl-sn-glycerol 3-phosphate	C00681
2agpe161[c]	92	628	1.423	1.5526	0.5845	0.508936	2agpe161	2-Acyl-sn-glycero-3-phosphoethanolamine (n-C16:1)	C05973
2agpg181[c]	110	628	1.423	1.5526	0.5845	0.508936	2agpg181	2-Acyl-sn-glycero-3-phosphoglycerol (n-C18:1)	0
2hdecg3p[p]	136	628	1.423	1.5526	0.5845	0.508936	2hdecg3p	2-hexadecanoyl-sn-glycerol 3-phosphate	C03974
2tdec7eg3p[p]	160	628	1.423	1.5526	0.5845	0.508936	2tdec7eg3p	2-tetradec-7-enoyl-sn-glycerol 3-phosphate	C03974
apg140[c]	417	628	1.423	1.5526	0.5845	0.508936	apg140	acyl phosphatidylglycerol (n-C14:0)	0
2hdec9eg3p[p]	134	628	1.423	1.5526	0.5845	0.508936	2hdec9eg3p	2-hexadec-9-enoyl-sn-glycerol 3-phosphate	C03974
etha[c]	706	628	1.423	1.5526	0.5845	0.508936	etha	Ethanolamine	C00189
2agpg141[c]	102	628	1.423	1.5526	0.5845	0.508936	2agpg141	2-Acyl-sn-glycero-3-phosphoglycerol (n-C14:1)	0
1tdec7eg3p[p]	55	628	1.423	1.5526	0.5845	0.508936	1tdec7eg3p	1-tetradec-7-enoyl-sn-glycerol 3-phosphate	C00681
2odec11eg3p[p]	146	628	1.423	1.5526	0.5845	0.508936	2odec11eg3p	2-octadec-11-enoyl-sn-glycerol 3-phosphate	C03974
2odecg3p[p]	148	628	1.423	1.5526	0.5845	0.508936	2odecg3p	2-octadecanoyl-sn-glycerol 3-phosphate	C03974
apg120[c]	416	628	1.423	1.5526	0.5845	0.508936	apg120	acyl phosphatidylglycerol (n-C12:0)	0
ddca[p]	617	628	1.423	1.5526	0.5845	0.508936	ddca	Dodecanoate (n-C12:0)	C02679
2agpe181[c]	96	628	1.423	1.5526	0.5845	0.508936	2agpe181	2-Acyl-sn-glycero-3-phosphoethanolamine (n-C18:1)	C05973
2agpg161[c]	106	628	1.423	1.5526	0.5845	0.508936	2agpg161	2-Acyl-sn-glycero-3-phosphoglycerol (n-C16:1)	0
2agpg180[c]	108	628	1.423	1.5526	0.5845	0.508936	2agpg180	2-Acyl-sn-glycero-3-phosphoglycerol (n-C18:0)	0
1ddecg3p[p]	44	628	1.423	1.5526	0.5845	0.508936	1ddecg3p	1-dodecanoyl-sn-glycerol 3-phosphate	C00681
1hdec9eg3p[p]	46	628	1.423	1.5526	0.5845	0.508936	1hdec9eg3p	1-hexadec-9-enoyl-sn-glycerol 3-phosphate	0
2ddecg3p[p]	118	628	1.423	1.5526	0.5845	0.508936	2ddecg3p	2-dodecanoyl-sn-glycerol 3-phosphate	C03974
2agpe120[c]	84	628	1.423	1.5526	0.5845	0.508936	2agpe120	2-Acyl-sn-glycero-3-phosphoethanolamine (n-C12:0)	C05973
2agpe140[c]	86	628	1.423	1.5526	0.5845	0.508936	2agpe140	2-Acyl-sn-glycero-3-phosphoethanolamine (n-C14:0)	C05973
2agpe141[c]	88	628	1.423	1.5526	0.5845	0.508936	2agpe141	2-Acyl-sn-glycero-3-phosphoethanolamine (n-C14:1)	C05973
2agpe160[c]	90	628	1.423	1.5526	0.5845	0.508936	2agpe160	2-Acyl-sn-glycero-3-phosphoethanolamine (n-C16:0)	C05973
apg180[c]	421	628	1.423	1.5526	0.5845	0.508936	apg180	acyl phosphatidylglycerol (n-C18:0)	0
apg181[c]	422	628	1.423	1.5526	0.5845	0.508936	apg181	acyl phosphatidylglycerol (n-C18:1)	0
1hdecg3p[p]	48	628	1.423	1.5526	0.5845	0.508936	1hdecg3p	1-hexadecanoyl-sn-glycerol 3-phosphate	C00681
1odec11eg3p[p]	50	628	1.423	1.5526	0.5845	0.508936	1odec11eg3p	1-octadec-11-enoyl-sn-glycerol 3-phosphate	0
2agpe180[c]	94	628	1.423	1.5526	0.5845	0.508936	2agpe180	2-Acyl-sn-glycero-3-phosphoethanolamine (n-C18:0)	C05973
2tdecg3p[p]	162	628	1.423	1.5526	0.5845	0.508936	2tdecg3p	2-tetradecanoyl-sn-glycerol 3-phosphate	C03974
2agpg120[c]	98	628	1.423	1.5526	0.5845	0.508936	2agpg120	2-Acyl-sn-glycero-3-phosphoglycerol (n-C12:0)	0
2agpg160[c]	104	628	1.423	1.5526	0.5845	0.508936	2agpg160	2-Acyl-sn-glycero-3-phosphoglycerol (n-C16:0)	0
apg141[c]	418	628	1.423	1.5526	0.5845	0.508936	apg141	acyl phosphatidylglycerol (n-C14:1)	0
1odecg3p[p]	52	628	1.423	1.5526	0.5845	0.508936	1odecg3p	1-octadecanoyl-sn-glycerol 3-phosphate	C00681
adphep-LD[c]	357	659.5	1.4128	1.5496	0.6127	0.498557	adphep-LD	ADP-L-glycero-D-manno-heptose	C06398
dhmptp[c]	633	659.5	1.4128	1.5496	0.6127	0.498557	dhmptp	dihydromonapterin-triphosphate	0
clpn140[p]	520	659.5	1.4128	1.5496	0.6127	0.498557	clpn140	cardiolipin (tetratetradecanoyl, n-C14:0)	C05980
fmnh2[c]	764	659.5	1.4128	1.5496	0.6127	0.498557	fmnh2	Reduced FMN	0
fmn[c]	763	659.5	1.4128	1.5496	0.6127	0.498557	fmn	FMN	C00061
clpn180[p]	524	659.5	1.4128	1.5496	0.6127	0.498557	clpn180	cardiolipin (tetraoctadecanoyl, n-C18:0)	C05980
dhpmp[c]	637	659.5	1.4128	1.5496	0.6127	0.498557	dhpmp	Dihydroneopterin monophosphate	C05925
clpn161[p]	523	659.5	1.4128	1.5496	0.6127	0.498557	clpn161	cardiolipin (tetrahexadec-9-enoyl, n-C16:1)	C05980
25drapp[c]	79	659.5	1.4128	1.5496	0.6127	0.498557	25drapp	2,5-Diamino-6-(ribosylamino)-4-(3H)-pyrimidinone 5'-phosphate	0
clpn181[p]	525	659.5	1.4128	1.5496	0.6127	0.498557	clpn181	cardiolipin (tetraoctadec-11-enoyl, n-C18:1)	C05980
ahdt[c]	366	659.5	1.4128	1.5496	0.6127	0.498557	ahdt	2-Amino-4-hydroxy-6-(erythro-1,2,3-trihydroxypropyl)dihydropteridine triphosphate	C04895
clpn141[p]	521	659.5	1.4128	1.5496	0.6127	0.498557	clpn141	cardiolipin (tetratetradec-7-enoyl, n-C14:1)	C05980
clpn160[p]	522	659.5	1.4128	1.5496	0.6127	0.498557	clpn160	cardiolipin (tetrahexadecanoyl, n-C16:0)	C05980
12dgr160[p]	9	674.5	1.412	1.5431	0.624	0.49774	12dgr160	1,2-Diacyl-sn-glycerol (dihexadecanoyl, n-C16:0)	C00641
12dgr161[p]	11	674.5	1.412	1.5431	0.624	0.49774	12dgr161	1,2-Diacyl-sn-glycerol (dihexadec-9-enoyl, n-C16:1)	C00641
12dgr180[p]	13	674.5	1.412	1.5431	0.624	0.49774	12dgr180	1,2-Diacyl-sn-glycerol (dioctadecanoyl, n-C18:0)	C00641
12dgr181[p]	15	674.5	1.412	1.5431	0.624	0.49774	12dgr181	1,2-Diacyl-sn-glycerol (dioctadec-11-enoyl, n-C18:1)	C00641
2agpe160[p]	91	692.5	1.4116	1.5402	0.6395	0.497331	2agpe160	2-Acyl-sn-glycero-3-phosphoethanolamine (n-C16:0)	C05973
2agpe161[p]	93	692.5	1.4116	1.5402	0.6395	0.497331	2agpe161	2-Acyl-sn-glycero-3-phosphoethanolamine (n-C16:1)	C05973
2agpg120[p]	99	692.5	1.4116	1.5402	0.6395	0.497331	2agpg120	2-Acyl-sn-glycero-3-phosphoglycerol (n-C12:0)	0
2agpg160[p]	105	692.5	1.4116	1.5402	0.6395	0.497331	2agpg160	2-Acyl-sn-glycero-3-phosphoglycerol (n-C16:0)	0
2agpg140[p]	101	692.5	1.4116	1.5402	0.6395	0.497331	2agpg140	2-Acyl-sn-glycero-3-phosphoglycerol (n-C14:0)	0
1agpg141[p]	38	692.5	1.4116	1.5402	0.6395	0.497331	1agpg141	1-Acyl-sn-glycero-3-phosphoglycerol (n-C14:1)	0
1agpg161[p]	40	692.5	1.4116	1.5402	0.6395	0.497331	1agpg161	1-Acyl-sn-glycero-3-phosphoglycerol (n-C16:1)	0
1agpg181[p]	42	692.5	1.4116	1.5402	0.6395	0.497331	1agpg181	1-Acyl-sn-glycero-3-phosphoglycerol (n-C18:1)	0
2agpe120[p]	85	692.5	1.4116	1.5402	0.6395	0.497331	2agpe120	2-Acyl-sn-glycero-3-phosphoethanolamine (n-C12:0)	C05973
2agpe140[p]	87	692.5	1.4116	1.5402	0.6395	0.497331	2agpe140	2-Acyl-sn-glycero-3-phosphoethanolamine (n-C14:0)	C05973
2agpe141[p]	89	692.5	1.4116	1.5402	0.6395	0.497331	2agpe141	2-Acyl-sn-glycero-3-phosphoethanolamine (n-C14:1)	C05973
2agpe181[p]	97	692.5	1.4116	1.5402	0.6395	0.497331	2agpe181	2-Acyl-sn-glycero-3-phosphoethanolamine (n-C18:1)	C05973
2agpg161[p]	107	692.5	1.4116	1.5402	0.6395	0.497331	2agpg161	2-Acyl-sn-glycero-3-phosphoglycerol (n-C16:1)	0
2agpg180[p]	109	692.5	1.4116	1.5402	0.6395	0.497331	2agpg180	2-Acyl-sn-glycero-3-phosphoglycerol (n-C18:0)	0
1agpe120[p]	29	692.5	1.4116	1.5402	0.6395	0.497331	1agpe120	1-Acyl-sn-glycero-3-phosphoethanolamine (n-C12:0)	C04438
1agpe140[p]	30	692.5	1.4116	1.5402	0.6395	0.497331	1agpe140	1-Acyl-sn-glycero-3-phosphoethanolamine (n-C14:0)	C04438
1agpe141[p]	31	692.5	1.4116	1.5402	0.6395	0.497331	1agpe141	1-Acyl-sn-glycero-3-phosphoethanolamine (n-C14:1)	C04438
1agpe160[p]	32	692.5	1.4116	1.5402	0.6395	0.497331	1agpe160	1-Acyl-sn-glycero-3-phosphoethanolamine (n-C16:0)	C04438
1agpe161[p]	33	692.5	1.4116	1.5402	0.6395	0.497331	1agpe161	1-Acyl-sn-glycero-3-phosphoethanolamine (n-C16:1)	C04438
1agpe180[p]	34	692.5	1.4116	1.5402	0.6395	0.497331	1agpe180	1-Acyl-sn-glycero-3-phosphoethanolamine (n-C18:0)	C04438
1agpe181[p]	35	692.5	1.4116	1.5402	0.6395	0.497331	1agpe181	1-Acyl-sn-glycero-3-phosphoethanolamine (n-C18:1)	C04438
1agpg120[p]	36	692.5	1.4116	1.5402	0.6395	0.497331	1agpg120	1-Acyl-sn-glycero-3-phosphoglycerol (n-C12:0)	0
1agpg140[p]	37	692.5	1.4116	1.5402	0.6395	0.497331	1agpg140	1-Acyl-sn-glycero-3-phosphoglycerol (n-C14:0)	0
1agpg160[p]	39	692.5	1.4116	1.5402	0.6395	0.497331	1agpg160	1-Acyl-sn-glycero-3-phosphoglycerol (n-C16:0)	0
1agpg180[p]	41	692.5	1.4116	1.5402	0.6395	0.497331	1agpg180	1-Acyl-sn-glycero-3-phosphoglycerol (n-C18:0)	0
2agpg181[p]	111	692.5	1.4116	1.5402	0.6395	0.497331	2agpg181	2-Acyl-sn-glycero-3-phosphoglycerol (n-C18:1)	0
2agpe180[p]	95	692.5	1.4116	1.5402	0.6395	0.497331	2agpe180	2-Acyl-sn-glycero-3-phosphoethanolamine (n-C18:0)	C05973
2agpg141[p]	103	692.5	1.4116	1.5402	0.6395	0.497331	2agpg141	2-Acyl-sn-glycero-3-phosphoglycerol (n-C14:1)	0
asn-L[c]	445	708	1.4089	1.5376	0.6526	0.494569	asn-L	L-Asparagine	C00152
gsn[c]	923	708	1.4089	1.5376	0.6526	0.494569	gsn	Guanosine	C00387
dgsn[c]	623	708	1.4089	1.5376	0.6526	0.494569	dgsn	Deoxyguanosine	C00330
2ombzl[c]	150	729.5	1.4003	1.5325	0.6702	0.485736	2ombzl	2-Octaprenyl-6-methoxy-1,4-benzoquinol	0
5apru[c]	260	729.5	1.4003	1.5325	0.6702	0.485736	5apru	5-Amino-6-(5'-phosphoribosylamino)uracil	C01268
6hmhpt[c]	273	729.5	1.4003	1.5325	0.6702	0.485736	6hmhpt	6-hydroxymethyl dihydropterin	0
adocbl[c]	351	729.5	1.4003	1.5325	0.6702	0.485736	adocbl	Adenosylcobalamin	C00194
dmpp[c]	652	729.5	1.4003	1.5325	0.6702	0.485736	dmpp	Dimethylallyl diphosphate	C00235
5mthf[c]	270	729.5	1.4003	1.5325	0.6702	0.485736	5mthf	5-Methyltetrahydrofolate	C00440
5aprbu[c]	259	729.5	1.4003	1.5325	0.6702	0.485736	5aprbu	5-Amino-6-(5'-phosphoribitylamino)uracil	C04454
dhpt[c]	639	729.5	1.4003	1.5325	0.6702	0.485736	dhpt	Dihydropteroate	C00921
grdp[c]	920	729.5	1.4003	1.5325	0.6702	0.485736	grdp	Geranyl diphosphate	C00341
2mecdp[c]	143	729.5	1.4003	1.5325	0.6702	0.485736	2mecdp	2-C-methyl-D-erythritol 2,4-cyclodiphosphate	C11453
2omph[c]	153	729.5	1.4003	1.5325	0.6702	0.485736	2omph	2-Octaprenyl-6-methoxyphenol	C05812
frdp[c]	770	729.5	1.4003	1.5325	0.6702	0.485736	frdp	Farnesyl diphosphate	C00448
dhf[c]	632	729.5	1.4003	1.5325	0.6702	0.485736	dhf	7,8-Dihydrofolate	C00415
clpn120[p]	519	765	1.3995	1.5208	0.6975	0.484911	clpn120	cardiolipin (tetradodecanoyl, n-C12:0)	C05980
gggagicolipa[c]	857	765	1.3995	1.5208	0.6975	0.484911	gggagicolipa	glucosyl-glucosyl-galactosyl-glucosyl-inner core oligosaccharide lipid A	0
ggagicolipa[c]	855	765	1.3995	1.5208	0.6975	0.484911	ggagicolipa	glucosyl-galactosyl-glucosyl-inner core oligosaccharide lipid A	0
gicolipa[c]	859	765	1.3995	1.5208	0.6975	0.484911	gicolipa	glucosyl-inner core oligosaccharide lipid A	0
acolipa[e]	332	765	1.3995	1.5208	0.6975	0.484911	acolipa	4-Amino-4-deoxy-L-arabinose modified core oligosaccharide lipid A	0
acolipa[p]	333	765	1.3995	1.5208	0.6975	0.484911	acolipa	4-Amino-4-deoxy-L-arabinose modified core oligosaccharide lipid A	0
eca4colipa[e]	697	765	1.3995	1.5208	0.6975	0.484911	eca4colipa	(enterobacterial common antigen)x4 core oligosaccharide lipid A	0
colipa[c]	536	765	1.3995	1.5208	0.6975	0.484911	colipa	core oligosaccharide lipid A	0
eca4colipa[p]	698	765	1.3995	1.5208	0.6975	0.484911	eca4colipa	(enterobacterial common antigen)x4 core oligosaccharide lipid A	0
gagicolipa[c]	809	765	1.3995	1.5208	0.6975	0.484911	gagicolipa	galactosyl-glucosyl-inner core oligosaccharide lipid A	0
1hdecg3p[c]	47	793	1.3986	1.5096	0.7177	0.483983	1hdecg3p	1-hexadecanoyl-sn-glycerol 3-phosphate	C00681
1tdecg3p[c]	56	793	1.3986	1.5096	0.7177	0.483983	1tdecg3p	1-tetradecanoyl-sn-glycerol 3-phosphate	C00681
colipa[e]	537	793	1.3986	1.5096	0.7177	0.483983	colipa	core oligosaccharide lipid A	0
colipa[p]	538	793	1.3986	1.5096	0.7177	0.483983	colipa	core oligosaccharide lipid A	0
1tdec7eg3p[c]	54	793	1.3986	1.5096	0.7177	0.483983	1tdec7eg3p	1-tetradec-7-enoyl-sn-glycerol 3-phosphate	C00681
1odec11eg3p[c]	49	793	1.3986	1.5096	0.7177	0.483983	1odec11eg3p	1-octadec-11-enoyl-sn-glycerol 3-phosphate	0
1odecg3p[c]	51	793	1.3986	1.5096	0.7177	0.483983	1odecg3p	1-octadecanoyl-sn-glycerol 3-phosphate	C00681
12dgr160[c]	8	793	1.3986	1.5096	0.7177	0.483983	12dgr160	1,2-Diacyl-sn-glycerol (dihexadecanoyl, n-C16:0)	C00641
12dgr180[c]	12	793	1.3986	1.5096	0.7177	0.483983	12dgr180	1,2-Diacyl-sn-glycerol (dioctadecanoyl, n-C18:0)	C00641
12dgr181[c]	14	793	1.3986	1.5096	0.7177	0.483983	12dgr181	1,2-Diacyl-sn-glycerol (dioctadec-11-enoyl, n-C18:1)	C00641
1ddecg3p[c]	43	793	1.3986	1.5096	0.7177	0.483983	1ddecg3p	1-dodecanoyl-sn-glycerol 3-phosphate	C00681
1hdec9eg3p[c]	45	793	1.3986	1.5096	0.7177	0.483983	1hdec9eg3p	1-hexadec-9-enoyl-sn-glycerol 3-phosphate	0
12dgr120[p]	3	809	1.3915	1.5029	0.7289	0.476641	12dgr120	1,2-Diacyl-sn-glycerol (didodecanoyl, n-C12:0)	C00641
12dgr140[p]	5	809	1.3915	1.5029	0.7289	0.476641	12dgr140	1,2-Diacyl-sn-glycerol (ditetradecanoyl, n-C14:0)	C00641
12dgr141[p]	7	809	1.3915	1.5029	0.7289	0.476641	12dgr141	1,2-Diacyl-sn-glycerol (ditetradec-7-enoyl, n-C14:1)	C00641
ddca[c]	615	819.5	1.3845	1.4984	0.7362	0.469365	ddca	Dodecanoate (n-C12:0)	C02679
dca[c]	600	819.5	1.3845	1.4984	0.7362	0.469365	dca	Decanoate (n-C10:0)	C01571
12dgr120[c]	2	819.5	1.3845	1.4984	0.7362	0.469365	12dgr120	1,2-Diacyl-sn-glycerol (didodecanoyl, n-C12:0)	C00641
12dgr140[c]	4	819.5	1.3845	1.4984	0.7362	0.469365	12dgr140	1,2-Diacyl-sn-glycerol (ditetradecanoyl, n-C14:0)	C00641
12dgr141[c]	6	819.5	1.3845	1.4984	0.7362	0.469365	12dgr141	1,2-Diacyl-sn-glycerol (ditetradec-7-enoyl, n-C14:1)	C00641
12dgr161[c]	10	819.5	1.3845	1.4984	0.7362	0.469365	12dgr161	1,2-Diacyl-sn-glycerol (dihexadec-9-enoyl, n-C16:1)	C00641
2omhmbl[c]	151	829	1.3833	1.4942	0.7426	0.468114	2omhmbl	2-Octaprenyl-3-methyl-5-hydroxy-6-methoxy-1,4-benzoquinol	0
3ophb[c]	226	829	1.3833	1.4942	0.7426	0.468114	3ophb	3-Octaprenyl-4-hydroxybenzoate	C05809
2ommbl[c]	152	829	1.3833	1.4942	0.7426	0.468114	2ommbl	2-Octaprenyl-3-methyl-6-methoxy- 1,4-benzoquinol	0
2oph[c]	154	829	1.3833	1.4942	0.7426	0.468114	2oph	2-Octaprenylphenol	C05810
2ohph[c]	149	829	1.3833	1.4942	0.7426	0.468114	2ohph	2-Octaprenyl-6-hydroxyphenol	C05811
3psme[c]	230	842	1.3723	1.4882	0.7512	0.456596	3psme	5-O-(1-Carboxyvinyl)-3-phosphoshikimate	C01269
5aizc[c]	257	842	1.3723	1.4882	0.7512	0.456596	5aizc	5-amino-1-(5-phospho-D-ribosyl)imidazole-4-carboxylate	C04751
fpram[c]	768	842	1.3723	1.4882	0.7512	0.456596	fpram	2-(Formamido)-N1-(5-phospho-D-ribosyl)acetamidine	C04640
3ig3p[c]	206	842	1.3723	1.4882	0.7512	0.456596	3ig3p	C'-(3-Indolyl)-glycerol 3-phosphate	C03506
2me4p[c]	142	842	1.3723	1.4882	0.7512	0.456596	2me4p	2-C-methyl-D-erythritol 4-phosphate	C11434
aicar[c]	367	842	1.3723	1.4882	0.7512	0.456596	aicar	5-Amino-1-(5-Phospho-D-ribosyl)imidazole-4-carboxamide	C04677
4ampm[c]	241	842	1.3723	1.4882	0.7512	0.456596	4ampm	4-Amino-2-methyl-5-phosphomethylpyrimidine	C04556
glyc3p[c]	899	842	1.3723	1.4882	0.7512	0.456596	glyc3p	Glycerol 3-phosphate	C00093
gmhep17bp[c]	913	842	1.3723	1.4882	0.7512	0.456596	gmhep17bp	D-Glycero-D-manno-heptose 1,7-bisphosphate	C11472
gmhep1p[c]	914	842	1.3723	1.4882	0.7512	0.456596	gmhep1p	D-Glycero-D-manno-heptose 1-phosphate	C07838
db4p[c]	597	842	1.3723	1.4882	0.7512	0.456596	db4p	3,4-dihydroxy-2-butanone 4-phosphate	0
25aics[c]	77	842	1.3723	1.4882	0.7512	0.456596	25aics	(S)-2-[5-Amino-1-(5-phospho-D-ribosyl)imidazole-4-carboxamido]succinate	C04823
2cpr5p[c]	115	842	1.3723	1.4882	0.7512	0.456596	2cpr5p	1-(2-Carboxyphenylamino)-1-deoxy-D-ribulose 5-phosphate	C01302
air[c]	368	842	1.3723	1.4882	0.7512	0.456596	air	5-amino-1-(5-phospho-D-ribosyl)imidazole	C03373
2mahmp[c]	139	842	1.3723	1.4882	0.7512	0.456596	2mahmp	2-Methyl-4-amino-5-hydroxymethylpyrimidine diphosphate	C04752
6pgc[c]	275	859.5	1.3666	1.4799	0.7626	0.450591	6pgc	6-Phospho-D-gluconate	C00345
6pgl[c]	276	859.5	1.3666	1.4799	0.7626	0.450591	6pgl	6-phospho-D-glucono-1,5-lactone	C01236
13dpg[c]	22	859.5	1.3666	1.4799	0.7626	0.450591	13dpg	3-Phospho-D-glyceroyl phosphate	C00236
g6p[c]	806	859.5	1.3666	1.4799	0.7626	0.450591	g6p	D-Glucose 6-phosphate	C00092
dhap[c]	630	859.5	1.3666	1.4799	0.7626	0.450591	dhap	Dihydroxyacetone phosphate	C00111
2ddg6p[c]	119	859.5	1.3666	1.4799	0.7626	0.450591	2ddg6p	2-Dehydro-3-deoxy-D-gluconate 6-phosphate	C04442
g3p[c]	790	859.5	1.3666	1.4799	0.7626	0.450591	g3p	Glyceraldehyde 3-phosphate	C00661
fdp[c]	726	859.5	1.3666	1.4799	0.7626	0.450591	fdp	D-Fructose 1,6-bisphosphate	C00354
f6p[c]	716	859.5	1.3666	1.4799	0.7626	0.450591	f6p	D-Fructose 6-phosphate	C00085
all6p[c]	386	859.5	1.3666	1.4799	0.7626	0.450591	all6p	D-Allose 6-phosphate	C02962
allul6p[c]	394	859.5	1.3666	1.4799	0.7626	0.450591	allul6p	Allulose 6-phosphate	0
dhnpt[c]	635	868.5	1.3602	1.4753	0.7681	0.443819	dhnpt	Dihydroneopterin	C04874
dmlz[c]	651	868.5	1.3602	1.4753	0.7681	0.443819	dmlz	6,7-Dimethyl-8-(1-D-ribityl)lumazine	C04332
fum[p]	786	872	1.3531	1.4731	0.7701	0.436268	fum	Fumarate	C00122
fum[e]	785	872	1.3531	1.4731	0.7701	0.436268	fum	Fumarate	C00122
ara5p[c]	425	874.5	1.3336	1.472	0.7717	0.415326	ara5p	D-Arabinose 5-phosphate	C01112
4r5au[c]	256	889	1.3212	1.4645	0.7806	0.401849	4r5au	4-(1-D-Ribitylamino)-5-aminouracil	C04732
2dda7p[c]	116	889	1.3212	1.4645	0.7806	0.401849	2dda7p	2-Dehydro-3-deoxy-D-arabino-heptonate 7-phosphate	C04691
5caiz[c]	261	889	1.3212	1.4645	0.7806	0.401849	5caiz	5-phosphoribosyl-5-carboxyaminoimidazole	0
4hthr[c]	248	889	1.3212	1.4645	0.7806	0.401849	4hthr	4-Hydroxy-L-threonine	C06056
4per[c]	253	889	1.3212	1.4645	0.7806	0.401849	4per	4-Phospho-D-erythronate	C03393
fgam[c]	759	889	1.3212	1.4645	0.7806	0.401849	fgam	N2-Formyl-N1-(5-phospho-D-ribosyl)glycinamide	C04376
ala-B[c]	372	889	1.3212	1.4645	0.7806	0.401849	ala-B	beta-Alanine	C00099
acetol[c]	305	889	1.3212	1.4645	0.7806	0.401849	acetol	Acetol	C05235
2dr1p[c]	130	889	1.3212	1.4645	0.7806	0.401849	2dr1p	2-Deoxy-D-ribose 1-phosphate	C00672
2dr5p[c]	131	889	1.3212	1.4645	0.7806	0.401849	2dr5p	2-Deoxy-D-ribose 5-phosphate	C00673
e4p[c]	694	889	1.3212	1.4645	0.7806	0.401849	e4p	D-Erythrose 4-phosphate	C00279
asp-L[c]	453	889	1.3212	1.4645	0.7806	0.401849	asp-L	L-Aspartate	C00049
gar[c]	839	889	1.3212	1.4645	0.7806	0.401849	gar	N1-(5-Phospho-D-ribosyl)glycinamide	C03838
3dhsk[c]	177	909	1.3157	1.4534	0.7921	0.395831	3dhsk	3-Dehydroshikimate	C02637
dhptd[c]	640	909	1.3157	1.4534	0.7921	0.395831	dhptd	4,5-dihydroxy-2,3-pentanedione	C11838
4hbz[c]	245	909	1.3157	1.4534	0.7921	0.395831	4hbz	4-Hydroxybenzoate	C00156
acanth[c]	303	909	1.3157	1.4534	0.7921	0.395831	acanth	N-Acetylanthranilate	C06332
glyald[c]	891	909	1.3157	1.4534	0.7921	0.395831	glyald	D-Glyceraldehyde	C00577
chor[c]	509	909	1.3157	1.4534	0.7921	0.395831	chor	chorismate	C00251
glyald[p]	893	909	1.3157	1.4534	0.7921	0.395831	glyald	D-Glyceraldehyde	C00577
23ddhb[c]	69	909	1.3157	1.4534	0.7921	0.395831	23ddhb	2,3-Dihydro-2,3-dihydroxybenzoate	C04171
23dhb[c]	70	909	1.3157	1.4534	0.7921	0.395831	23dhb	2,3-Dihydroxybenzoate	C00196
glyald[e]	892	909	1.3157	1.4534	0.7921	0.395831	glyald	D-Glyceraldehyde	C00577
3dhq[c]	176	909	1.3157	1.4534	0.7921	0.395831	3dhq	3-Dehydroquinate	C00944
fum[c]	784	922.5	1.3102	1.4458	0.7996	0.389787	fum	Fumarate	C00122
anth[c]	413	922.5	1.3102	1.4458	0.7996	0.389787	anth	Anthranilate	C00108
4abz[c]	238	922.5	1.3102	1.4458	0.7996	0.389787	4abz	4-Aminobenzoate	C00568
4adcho[c]	239	922.5	1.3102	1.4458	0.7996	0.389787	4adcho	4-amino-4-deoxychorismate	C11355
glyc[e]	906	931	1.3028	1.4408	0.8042	0.381616	glyc	Glycerol	C00116
glyc[c]	905	931	1.3028	1.4408	0.8042	0.381616	glyc	Glycerol	C00116
glyc[p]	907	931	1.3028	1.4408	0.8042	0.381616	glyc	Glycerol	C00116
12ppd-R[c]	16	931	1.3028	1.4408	0.8042	0.381616	12ppd-R	(R)-Propane-1,2-diol	C02912
12ppd-R[e]	17	931	1.3028	1.4408	0.8042	0.381616	12ppd-R	(R)-Propane-1,2-diol	C02912
12ppd-R[p]	18	931	1.3028	1.4408	0.8042	0.381616	12ppd-R	(R)-Propane-1,2-diol	C02912
cobalt2[c]	533	937	1.1901	1.4373	0.8074	0.251083	cobalt2	Co2+	C00175
acnam[e]	330	NA	NA	1.2892	0.8077	#VALUE!	acnam	N-Acetylneuraminate	C00270
arbtn-fe3[c]	433	NA	NA	1.2497	0.8077	#VALUE!	arbtn-fe3	Aerobactin	C05554
dsbdrd[c]	668	NA	NA	1.1198	0.8077	#VALUE!	dsbdrd	fused thiol:disulfide interchange protein (reduced)	0
acgal1p[p]	309	NA	NA	1.3067	0.8077	#VALUE!	acgal1p	N-Acetyl-D-galactosamine 1-phosphate	0
3hcinnm[p]	185	NA	NA	1.3733	0.8077	#VALUE!	3hcinnm	3-hydroxycinnamic acid	0
3hcmrs7eACP[c]	186	NA	NA	1.3719	0.8077	#VALUE!	3hcmrs7eACP	(R)-3-hydroxy-cis-myristol-7-eoyl-[acyl-carrier protein]	0
3hcpalm9eACP[c]	187	NA	NA	1.3705	0.8077	#VALUE!	3hcpalm9eACP	(R)-3-hydroxy-cis-palm-9-eoyl-[acyl-carrier protein]	0
acgam1p[e]	313	NA	NA	1.3029	0.8077	#VALUE!	acgam1p	N-Acetyl-D-glucosamine 1-phosphate	C04256
gsn[p]	925	NA	NA	1.0084	0.8077	#VALUE!	gsn	Guanosine	C00387
gthox[e]	927	NA	NA	1.0076	0.8077	#VALUE!	gthox	Oxidized glutathione	C00127
23camp[e]	58	NA	NA	1.4271	0.8077	#VALUE!	23camp	2',3'-Cyclic AMP	C02353
aso3[e]	450	NA	NA	1.2382	0.8077	#VALUE!	aso3	arsenite	C06697
aso3[p]	451	NA	NA	1.2371	0.8077	#VALUE!	aso3	arsenite	C06697
aso4[c]	452	NA	NA	1.2359	0.8077	#VALUE!	aso4	arsenate	C01478
galctn-D[p]	823	NA	NA	1.0459	0.8077	#VALUE!	galctn-D	D-Galactonate	C00880
galctn-L[c]	824	NA	NA	1.0451	0.8077	#VALUE!	galctn-L	L-Galactonate	0
dms[e]	654	NA	NA	1.1311	0.8077	#VALUE!	dms	Dimethyl sulfide	C00580
dmso[p]	658	NA	NA	1.1273	0.8077	#VALUE!	dmso	Dimethyl sulfoxide	C11143
cl[p]	518	NA	NA	1.1975	0.8077	#VALUE!	cl	Chloride	C00115
galctn-D[c]	821	NA	NA	1.0476	0.8077	#VALUE!	galctn-D	D-Galactonate	C00880
galctn-D[e]	822	NA	NA	1.0467	0.8077	#VALUE!	galctn-D	D-Galactonate	C00880
3ocddec5eACP[c]	209	NA	NA	1.3539	0.8077	#VALUE!	3ocddec5eACP	3-oxo-cis-dodec-5-enoyl-[acyl-carrier protein]	0
3ocmrs7eACP[c]	210	NA	NA	1.3526	0.8077	#VALUE!	3ocmrs7eACP	3-oxo-cis-myristol-7-eoyl-[acyl-carrier protein]	0
3oddecACP[c]	215	NA	NA	1.3485	0.8077	#VALUE!	3oddecACP	3-Oxododecanoyl-[acyl-carrier protein]	C05756
3sala[c]	231	NA	NA	1.3391	0.8077	#VALUE!	3sala	3-Sulfino-L-alanine	C00606
cechddd[c]	501	NA	NA	1.2071	0.8077	#VALUE!	cechddd	cis-3-(3-carboxyethyl)-3,5-cyclohexadiene-1,2-diol	0
dcyt[p]	612	NA	NA	1.1465	0.8077	#VALUE!	dcyt	Deoxycytidine	C00881
ddcaACP[c]	614	NA	NA	1.1455	0.8077	#VALUE!	ddcaACP	Dodecanoyl-ACP (n-C12:0ACP)	C05223
feoxam[p]	755	NA	NA	1.0812	0.8077	#VALUE!	feoxam	ferroxamine	0
feoxam-un[c]	756	NA	NA	1.0803	0.8077	#VALUE!	feoxam-un	ferroxamine minus Fe(3)	0
feoxam-un[e]	757	NA	NA	1.0795	0.8077	#VALUE!	feoxam-un	ferroxamine minus Fe(3)	0
fru[p]	773	NA	NA	1.0743	0.8077	#VALUE!	fru	D-Fructose	C00095
3gmp[e]	178	NA	NA	1.3817	0.8077	#VALUE!	3gmp	3'-GMP	C06193
g3pi[p]	802	NA	NA	1.0599	0.8077	#VALUE!	g3pi	sn-Glycero-3-phospho-1-inositol	C01225
g3ps[c]	803	NA	NA	1.0591	0.8077	#VALUE!	g3ps	Glycerophosphoserine	0
g3ps[e]	804	NA	NA	1.0583	0.8077	#VALUE!	g3ps	Glycerophosphoserine	0
dmbzid[c]	650	NA	NA	1.133	0.8077	#VALUE!	dmbzid	5,6-Dimethylbenzimidazole	C03114
dmso[c]	656	NA	NA	1.1292	0.8077	#VALUE!	dmso	Dimethyl sulfoxide	C11143
dmso[e]	657	NA	NA	1.1283	0.8077	#VALUE!	dmso	Dimethyl sulfoxide	C11143
3hhexACP[c]	195	NA	NA	1.3649	0.8077	#VALUE!	3hhexACP	(R)-3-Hydroxyhexanoyl-[acyl-carrier protein]	C05747
3hmrsACP[c]	196	NA	NA	1.3635	0.8077	#VALUE!	3hmrsACP	(R)-3-Hydroxytetradecanoyl-[acyl-carrier protein]	C04688
3hpalmACP[c]	201	NA	NA	1.3594	0.8077	#VALUE!	3hpalmACP	R-3-hydroxypalmitoyl-[acyl-carrier protein]	C04633
cl[e]	517	NA	NA	1.1985	0.8077	#VALUE!	cl	Chloride	C00115
gal1p[p]	812	NA	NA	1.0541	0.8077	#VALUE!	gal1p	alpha-D-Galactose 1-phosphate	C00446
din[e]	646	NA	NA	1.1359	0.8077	#VALUE!	din	Deoxyinosine	C05512
din[p]	647	NA	NA	1.1349	0.8077	#VALUE!	din	Deoxyinosine	C05512
dkmpp[c]	649	NA	NA	1.134	0.8077	#VALUE!	dkmpp	2,3-diketo-5-methylthio-1-phosphopentane	0
dms[p]	655	NA	NA	1.1302	0.8077	#VALUE!	dms	Dimethyl sulfide	C00580
dopa[e]	660	NA	NA	1.1264	0.8077	#VALUE!	dopa	Dopamine	C03758
3hoctACP[c]	198	NA	NA	1.3621	0.8077	#VALUE!	3hoctACP	(R)-3-Hydroxyoctanoyl-[acyl-carrier protein]	C04620
3hoctaACP[c]	199	NA	NA	1.3608	0.8077	#VALUE!	3hoctaACP	(R)-3-Hydroxyoctadecanoyl-[acyl-carrier protein]	0
actACP[c]	341	NA	NA	1.2867	0.8077	#VALUE!	actACP	Acetoacetyl-ACP	C05744
cpgn-un[e]	547	NA	NA	1.188	0.8077	#VALUE!	cpgn-un	coprogen unloaded (no Fe(III))	0
g3pc[p]	793	NA	NA	1.0624	0.8077	#VALUE!	g3pc	sn-Glycero-3-phosphocholine	C00670
g3pi[c]	800	NA	NA	1.0616	0.8077	#VALUE!	g3pi	sn-Glycero-3-phospho-1-inositol	C01225
g3pi[e]	801	NA	NA	1.0608	0.8077	#VALUE!	g3pi	sn-Glycero-3-phospho-1-inositol	C01225
2kmb[c]	138	NA	NA	1.396	0.8077	#VALUE!	2kmb	2-keto-4-methylthiobutyrate	0
3cmp[p]	173	NA	NA	1.386	0.8077	#VALUE!	3cmp	3'-cmp	C05822
3hpppn[p]	204	NA	NA	1.3553	0.8077	#VALUE!	3hpppn	3-(3-hydroxy-phenyl)propionate	0
cit[e]	512	NA	NA	1.2007	0.8077	#VALUE!	cit	Citrate	C00158
cit[p]	513	NA	NA	1.1996	0.8077	#VALUE!	cit	Citrate	C00158
cu[e]	568	NA	NA	1.1694	0.8077	#VALUE!	cu	Cu+	0
cystrna[c]	583	NA	NA	1.1584	0.8077	#VALUE!	cystrna	L-Cysteinyl-tRNA(Cys)	C03125
dms[c]	653	NA	NA	1.1321	0.8077	#VALUE!	dms	Dimethyl sulfide	C00580
fald[p]	723	NA	NA	1.1006	0.8077	#VALUE!	fald	Formaldehyde	C00067
frulys[c]	774	NA	NA	1.0734	0.8077	#VALUE!	frulys	fructoselysine	0
gcald[c]	844	NA	NA	1.0315	0.8077	#VALUE!	gcald	Glycolaldehyde	C00266
12ppd-S[e]	20	NA	NA	1.4347	0.8077	#VALUE!	12ppd-S	(S)-Propane-1,2-diol	C02917
12ppd-S[p]	21	NA	NA	1.4332	0.8077	#VALUE!	12ppd-S	(S)-Propane-1,2-diol	C02917
3hcvac11eACP[c]	188	NA	NA	1.3691	0.8077	#VALUE!	3hcvac11eACP	(R)-3-hydroxy-cis-vacc-11-enoyl-[acyl-carrier protein]	0
glytrna[c]	912	NA	NA	1.0137	0.8077	#VALUE!	glytrna	Glycyl-tRNA(Gly)	C02412
3omrsACP[c]	220	NA	NA	1.3445	0.8077	#VALUE!	3omrsACP	3-Oxotetradecanoyl-[acyl-carrier protein]	C05759
cbi[e]	482	NA	NA	1.2159	0.8077	#VALUE!	cbi	Cobinamide	C05774
ctbtcoa[c]	562	NA	NA	1.1745	0.8077	#VALUE!	ctbtcoa	crotonobetainyl-CoA	0
5mtr[c]	271	NA	NA	1.322	0.8077	#VALUE!	5mtr	5-Methylthio-D-ribose	C03089
dgsn[p]	625	NA	NA	1.1407	0.8077	#VALUE!	dgsn	Deoxyguanosine	C00330
crn[e]	554	NA	NA	1.1817	0.8077	#VALUE!	crn	L-Carnitine	C00318
34dhpac[e]	164	NA	NA	1.3931	0.8077	#VALUE!	34dhpac	3,4-Dihydroxyphenylacetaldehyde	C04043
34dhpac[p]	165	NA	NA	1.3917	0.8077	#VALUE!	34dhpac	3,4-Dihydroxyphenylacetaldehyde	C04043
3ohexACP[c]	219	NA	NA	1.3458	0.8077	#VALUE!	3ohexACP	3-Oxohexanoyl-[acyl-carrier protein]	C05746
3opalmACP[c]	225	NA	NA	1.3405	0.8077	#VALUE!	3opalmACP	3-Oxohexadecanoyl-[acyl-carrier protein]	C05762
acmum[e]	327	NA	NA	1.2929	0.8077	#VALUE!	acmum	N-Acetylmuramate	C02713
cddec5eACP[c]	491	NA	NA	1.2093	0.8077	#VALUE!	cddec5eACP	cis-dodec-5-enoyl-[acyl-carrier protein] (n-C12:1)	0
cdec3eACP[c]	492	NA	NA	1.2082	0.8077	#VALUE!	cdec3eACP	cis-dec-3-enoyl-[acyl-carrier protein] (n-C10:1)	0
galur[c]	830	NA	NA	1.0403	0.8077	#VALUE!	galur	D-Galacturonate	C00333
all-D[p]	389	NA	NA	1.2685	0.8077	#VALUE!	all-D	D-Allose	C01487
galct-D[e]	819	NA	NA	1.0492	0.8077	#VALUE!	galct-D	D-Galactarate	C00879
gbbtn[c]	841	NA	NA	1.0339	0.8077	#VALUE!	gbbtn	gamma-butyrobetaine	0
feoxam[c]	753	NA	NA	1.0829	0.8077	#VALUE!	feoxam	ferroxamine	0
feoxam[e]	754	NA	NA	1.0821	0.8077	#VALUE!	feoxam	ferroxamine	0
gln-L[e]	875	NA	NA	1.0221	0.8077	#VALUE!	gln-L	L-Glutamine	C00064
gln-L[p]	876	NA	NA	1.0214	0.8077	#VALUE!	gln-L	L-Glutamine	C00064
gam[e]	837	NA	NA	1.0363	0.8077	#VALUE!	gam	D-Glucosamine	C00329
3ocvac11eACP[c]	212	NA	NA	1.3499	0.8077	#VALUE!	3ocvac11eACP	3-oxo-cis-vacc-11-enoyl-[acyl-carrier protein]	0
amp[p]	402	NA	NA	1.2626	0.8077	#VALUE!	amp	AMP	C00020
8aonn[c]	277	NA	NA	1.3195	0.8077	#VALUE!	8aonn	8-Amino-7-oxononanoate	C01092
ACP[c]	278	NA	NA	1.3182	0.8077	#VALUE!	ACP	acyl carrier protein	C00229
23cgmp[e]	62	NA	NA	1.4211	0.8077	#VALUE!	23cgmp	2',3'-Cyclic GMP	C06194
galt[p]	829	NA	NA	1.0411	0.8077	#VALUE!	galt	Galactitol	C01697
3hpppn[e]	203	NA	NA	1.3567	0.8077	#VALUE!	3hpppn	3-(3-hydroxy-phenyl)propionate	0
3ooctACP[c]	222	NA	NA	1.3431	0.8077	#VALUE!	3ooctACP	3-Oxooctanoyl-[acyl-carrier protein]	C05750
cpgn[c]	543	NA	NA	1.1922	0.8077	#VALUE!	cpgn	coprogen	0
duri[e]	689	NA	NA	1.1124	0.8077	#VALUE!	duri	Deoxyuridine	C00526
gmp[e]	917	NA	NA	1.0129	0.8077	#VALUE!	gmp	GMP	C00144
23ccmp[p]	61	NA	NA	1.4226	0.8077	#VALUE!	23ccmp	2',3'-Cyclic CMP	C02354
csn[e]	558	NA	NA	1.1786	0.8077	#VALUE!	csn	Cytosine	C00380
3hpppn[c]	202	NA	NA	1.358	0.8077	#VALUE!	3hpppn	3-(3-hydroxy-phenyl)propionate	0
dopa[p]	661	NA	NA	1.1254	0.8077	#VALUE!	dopa	Dopamine	C03758
gmp[p]	918	NA	NA	1.0121	0.8077	#VALUE!	gmp	GMP	C00144
gp4g[c]	919	NA	NA	1.0114	0.8077	#VALUE!	gp4g	P1,P4-Bis(5'-guanosyl) tetraphosphate	C01261
cu2[e]	565	NA	NA	1.1725	0.8077	#VALUE!	cu2	Cu2+	0
cu2[p]	566	NA	NA	1.1714	0.8077	#VALUE!	cu2	Cu2+	0
3odecACP[c]	216	NA	NA	1.3472	0.8077	#VALUE!	3odecACP	3-Oxodecanoyl-[acyl-carrier protein]	C05753
acACP[c]	293	NA	NA	1.313	0.8077	#VALUE!	acACP	Acetyl-ACP	0
acmum[p]	328	NA	NA	1.2916	0.8077	#VALUE!	acmum	N-Acetylmuramate	C02713
cenchddd[c]	502	NA	NA	1.2061	0.8077	#VALUE!	cenchddd	cis-3-(3-carboxyethenyl)-3,5-cyclohexadiene-1,2-diol	0
galur[p]	832	NA	NA	1.0387	0.8077	#VALUE!	galur	D-Galacturonate	C00333
acmana[e]	323	NA	NA	1.2953	0.8077	#VALUE!	acmana	N-Acetyl-D-mannosamine	C00645
cmp[e]	527	NA	NA	1.1964	0.8077	#VALUE!	cmp	CMP	C00055
cmp[p]	528	NA	NA	1.1954	0.8077	#VALUE!	cmp	CMP	C00055
3ump[e]	232	NA	NA	1.3378	0.8077	#VALUE!	3ump	3'-UMP	C01368
4hoxpacd[e]	246	NA	NA	1.3312	0.8077	#VALUE!	4hoxpacd	4-Hydroxyphenylacetaldehyde	C03765
4hoxpacd[p]	247	NA	NA	1.3299	0.8077	#VALUE!	4hoxpacd	4-Hydroxyphenylacetaldehyde	C03765
5dh4dglc[c]	265	NA	NA	1.3273	0.8077	#VALUE!	5dh4dglc	5-Dehydro-4-deoxy-D-glucarate	C00679
5mdr1p[c]	267	NA	NA	1.3259	0.8077	#VALUE!	5mdr1p	5-Methylthio-5-deoxy-D-ribose 1-phosphate	C04188
ascb6p[c]	442	NA	NA	1.2439	0.8077	#VALUE!	ascb6p	L-ascorbate-6-phosphate	0
ascb-L[e]	443	NA	NA	1.2428	0.8077	#VALUE!	ascb-L	L-Ascorbate	C00072
ascb-L[p]	444	NA	NA	1.2416	0.8077	#VALUE!	ascb-L	L-Ascorbate	C00072
asptrna[c]	457	NA	NA	1.2348	0.8077	#VALUE!	asptrna	L-Aspartyl-tRNA(Asp)	C02984
cd2[e]	489	NA	NA	1.2115	0.8077	#VALUE!	cd2	Cadmium	C01413
cd2[p]	490	NA	NA	1.2104	0.8077	#VALUE!	cd2	Cadmium	C01413
crncoa[c]	556	NA	NA	1.1797	0.8077	#VALUE!	crncoa	L-Carnitinyl-CoA	0
cu2[c]	564	NA	NA	1.1735	0.8077	#VALUE!	cu2	Cu2+	0
dtmp[p]	682	NA	NA	1.1152	0.8077	#VALUE!	dtmp	dTMP	C00364
fuc-L[p]	783	NA	NA	1.0666	0.8077	#VALUE!	fuc-L	L-Fucose	C01019
galur[e]	831	NA	NA	1.0395	0.8077	#VALUE!	galur	D-Galacturonate	C00333
gdp[e]	846	NA	NA	1.0307	0.8077	#VALUE!	gdp	GDP	C00035
glcur[p]	873	NA	NA	1.0229	0.8077	#VALUE!	glcur	D-Glucuronate	C00191
glyb[p]	896	NA	NA	1.016	0.8077	#VALUE!	glyb	Glycine betaine	C00719
gam6p[p]	836	NA	NA	1.0371	0.8077	#VALUE!	gam6p	D-Glucosamine 6-phosphate	C00352
gbbtn[e]	842	NA	NA	1.0331	0.8077	#VALUE!	gbbtn	gamma-butyrobetaine	0
fuc-L[e]	782	NA	NA	1.0675	0.8077	#VALUE!	fuc-L	L-Fucose	C01019
dump[p]	687	NA	NA	1.1134	0.8077	#VALUE!	dump	dUMP	C00365
gbbtn[p]	843	NA	NA	1.0323	0.8077	#VALUE!	gbbtn	gamma-butyrobetaine	0
apoACP[c]	423	NA	NA	1.259	0.8077	#VALUE!	apoACP	apoprotein [acyl carrier protein]	0
3dhguln[c]	174	NA	NA	1.3845	0.8077	#VALUE!	3dhguln	3-Dehydro-L-gulonate	C00618
5mdru1p[c]	268	NA	NA	1.3246	0.8077	#VALUE!	5mdru1p	5-Methylthio-5-deoxy-D-ribulose 1-phosphate	C04582
cu[p]	569	NA	NA	1.1684	0.8077	#VALUE!	cu	Cu+	0
cys-D[c]	576	NA	NA	1.1613	0.8077	#VALUE!	cys-D	D-Cysteine	C00793
dtbt[c]	672	NA	NA	1.1171	0.8077	#VALUE!	dtbt	Dethiobiotin	C01909
argtrna[c]	441	NA	NA	1.2451	0.8077	#VALUE!	argtrna	L-Arginyl-tRNA(Arg)	C02163
cpgn[e]	544	NA	NA	1.1911	0.8077	#VALUE!	cpgn	coprogen	0
cpgn[p]	545	NA	NA	1.1901	0.8077	#VALUE!	cpgn	coprogen	0
cpgn-un[c]	546	NA	NA	1.189	0.8077	#VALUE!	cpgn-un	coprogen unloaded (no Fe(III))	0
acac[e]	298	NA	NA	1.3105	0.8077	#VALUE!	acac	Acetoacetate	C00164
acac[p]	299	NA	NA	1.3092	0.8077	#VALUE!	acac	Acetoacetate	C00164
acgal1p[e]	308	NA	NA	1.3079	0.8077	#VALUE!	acgal1p	N-Acetyl-D-galactosamine 1-phosphate	0
acmana[p]	324	NA	NA	1.2941	0.8077	#VALUE!	acmana	N-Acetyl-D-mannosamine	C00645
arab-L[e]	427	NA	NA	1.2567	0.8077	#VALUE!	arab-L	L-Arabinose	C00259
arab-L[p]	428	NA	NA	1.2555	0.8077	#VALUE!	arab-L	L-Arabinose	C00259
aragund[c]	429	NA	NA	1.2543	0.8077	#VALUE!	aragund	O-acetyl-rhamanosyl-N-acetylglucosamyl-undecaprenyl diphosphate	0
ctbt[c]	560	NA	NA	1.1766	0.8077	#VALUE!	ctbt	crotonobetaine	C04114
dsbdox[c]	667	NA	NA	1.1208	0.8077	#VALUE!	dsbdox	fused thiol:disulfide interchange protein (oxidized)	0
gly[p]	890	NA	NA	1.0183	0.8077	#VALUE!	gly	Glycine	C00037
glyc2p[e]	897	NA	NA	1.0152	0.8077	#VALUE!	glyc2p	Glycerol 2-phosphate	C02979
amp[e]	401	NA	NA	1.2638	0.8077	#VALUE!	amp	AMP	C00020
dsbaox[p]	663	NA	NA	1.1245	0.8077	#VALUE!	dsbaox	periplasmic protein disulfide isomerase I (oxidized)	0
dsbard[p]	664	NA	NA	1.1236	0.8077	#VALUE!	dsbard	periplasmic protein disulfide isomerase I (reduced)	0
dsbcox[p]	665	NA	NA	1.1226	0.8077	#VALUE!	dsbcox	protein disulfide isomerase II (oxidized)	0
dsbcrd[p]	666	NA	NA	1.1217	0.8077	#VALUE!	dsbcrd	protein disulfide isomerase II (reduced)	0
gfgaragund[c]	853	NA	NA	1.0292	0.8077	#VALUE!	gfgaragund	galactofuranosyl-glucosyl-O-acetyl-rhamanosyl-N-acetylglucosamyl-undecaprenyl diphosphate	0
gly[e]	889	NA	NA	1.019	0.8077	#VALUE!	gly	Glycine	C00037
glyc2p[p]	898	NA	NA	1.0144	0.8077	#VALUE!	glyc2p	Glycerol 2-phosphate	C02979
2pglyc[c]	157	NA	NA	1.3946	0.8077	#VALUE!	2pglyc	2-Phosphoglycolate	C00988
crn-D[p]	552	NA	NA	1.1838	0.8077	#VALUE!	crn-D	D-Carnitine	C00487
crn[c]	553	NA	NA	1.1828	0.8077	#VALUE!	crn	L-Carnitine	C00318
dtmp[e]	681	NA	NA	1.1161	0.8077	#VALUE!	dtmp	dTMP	C00364
gam6p[e]	835	NA	NA	1.0379	0.8077	#VALUE!	gam6p	D-Glucosamine 6-phosphate	C00352
4hba[c]	244	NA	NA	1.3325	0.8077	#VALUE!	4hba	4-Hydroxy-benzyl alcohol	0
acgam1p[p]	314	NA	NA	1.3016	0.8077	#VALUE!	acgam1p	N-Acetyl-D-glucosamine 1-phosphate	C04256
ap4a[c]	414	NA	NA	1.2614	0.8077	#VALUE!	ap4a	P1,P4-Bis(5'-adenosyl) tetraphosphate	C01260
ca2[e]	477	NA	NA	1.2192	0.8077	#VALUE!	ca2	Calcium	C00076
ca2[p]	478	NA	NA	1.218	0.8077	#VALUE!	ca2	Calcium	C00076
csn[p]	559	NA	NA	1.1776	0.8077	#VALUE!	csn	Cytosine	C00380
dad-2[e]	588	NA	NA	1.1574	0.8077	#VALUE!	dad-2	Deoxyadenosine	C00559
dump[e]	686	NA	NA	1.1143	0.8077	#VALUE!	dump	dUMP	C00365
frulys[e]	775	NA	NA	1.0726	0.8077	#VALUE!	frulys	fructoselysine	0
glutrna[c]	886	NA	NA	1.0198	0.8077	#VALUE!	glutrna	L-Glutamyl-tRNA(Glu)	C02987
fru[e]	772	NA	NA	1.0752	0.8077	#VALUE!	fru	D-Fructose	C00095
ag[c]	359	NA	NA	1.2806	0.8077	#VALUE!	ag	silver	C06710
ag[e]	360	NA	NA	1.2794	0.8077	#VALUE!	ag	silver	C06710
damp[e]	593	NA	NA	1.1554	0.8077	#VALUE!	damp	dAMP	C00360
damp[p]	594	NA	NA	1.1544	0.8077	#VALUE!	damp	dAMP	C00360
dann[c]	595	NA	NA	1.1534	0.8077	#VALUE!	dann	7,8-Diaminononanoate	C01037
grxox[c]	921	NA	NA	1.0106	0.8077	#VALUE!	grxox	glutaredoxin (oxidized)	0
grxrd[c]	922	NA	NA	1.0099	0.8077	#VALUE!	grxrd	glutaredoxin (reduced)	0
gtp[p]	934	NA	NA	1.0053	0.8077	#VALUE!	gtp	GTP	C00044
adocbl[e]	352	NA	NA	1.283	0.8077	#VALUE!	adocbl	Adenosylcobalamin	C00194
cobalt2[e]	534	NA	NA	1.1943	0.8077	#VALUE!	cobalt2	Co2+	C00175
cobalt2[p]	535	NA	NA	1.1932	0.8077	#VALUE!	cobalt2	Co2+	C00175
cynt[c]	573	NA	NA	1.1644	0.8077	#VALUE!	cynt	Cyanate	C01417
cynt[e]	574	NA	NA	1.1634	0.8077	#VALUE!	cynt	Cyanate	C01417
cynt[p]	575	NA	NA	1.1623	0.8077	#VALUE!	cynt	Cyanate	C01417
gthox[p]	928	NA	NA	1.0068	0.8077	#VALUE!	gthox	Oxidized glutathione	C00127
galct-D[p]	820	NA	NA	1.0484	0.8077	#VALUE!	galct-D	D-Galactarate	C00879
galctn-L[p]	826	NA	NA	1.0435	0.8077	#VALUE!	galctn-L	L-Galactonate	0
adocbl[p]	353	NA	NA	1.2818	0.8077	#VALUE!	adocbl	Adenosylcobalamin	C00194
ala-B[e]	373	NA	NA	1.2769	0.8077	#VALUE!	ala-B	beta-Alanine	C00099
gsn[e]	924	NA	NA	1.0091	0.8077	#VALUE!	gsn	Guanosine	C00387
glcr[e]	867	NA	NA	1.0276	0.8077	#VALUE!	glcr	D-Glucarate	C00818
glcr[p]	868	NA	NA	1.0268	0.8077	#VALUE!	glcr	D-Glucarate	C00818
ala-B[p]	374	NA	NA	1.2757	0.8077	#VALUE!	ala-B	beta-Alanine	C00099
ap5a[c]	415	NA	NA	1.2602	0.8077	#VALUE!	ap5a	P1,P5-Bis(5'-adenosyl) pentaphosphate	C04058
dhpppn[c]	638	NA	NA	1.1388	0.8077	#VALUE!	dhpppn	3-(2,3-Dihydroxyphenyl)propanoate	C04044
3dhgulnp[c]	175	NA	NA	1.3831	0.8077	#VALUE!	3dhgulnp	3-keto-L-gulonate-6-phosphate	0
4ahmmp[c]	240	NA	NA	1.3351	0.8077	#VALUE!	4ahmmp	4-Amino-5-hydroxymethyl-2-methylpyrimidine	C01279
5prdmbz[c]	272	NA	NA	1.3207	0.8077	#VALUE!	5prdmbz	N1-(5-Phospho-alpha-D-ribosyl)-5,6-dimethylbenzimidazole	C04778
ala-L[e]	379	NA	NA	1.2745	0.8077	#VALUE!	ala-L	L-Alanine	C00041
ala-L[p]	380	NA	NA	1.2733	0.8077	#VALUE!	ala-L	L-Alanine	C00041
alpp[p]	395	NA	NA	1.2673	0.8077	#VALUE!	alpp	applipoprotein	C01834
altrn[c]	396	NA	NA	1.2661	0.8077	#VALUE!	altrn	D-Altronate	C00817
bbtcoa[c]	461	NA	NA	1.2337	0.8077	#VALUE!	bbtcoa	gamma-butyrobetainyl-CoA	0
but[e]	471	NA	NA	1.2247	0.8077	#VALUE!	but	Butyrate (n-C4:0)	C00246
dad-2[p]	589	NA	NA	1.1564	0.8077	#VALUE!	dad-2	Deoxyadenosine	C00559
dsbgox[p]	669	NA	NA	1.1189	0.8077	#VALUE!	dsbgox	periplasmic disulfide isomerase/thiol-disulphide oxidase (oxidized)	0
dsbgrd[p]	670	NA	NA	1.118	0.8077	#VALUE!	dsbgrd	periplasmic disulfide isomerase/thiol-disulphide oxidase (reduced)	0
fruur[c]	778	NA	NA	1.0709	0.8077	#VALUE!	fruur	D-Fructuronate	C00905
fruur[e]	779	NA	NA	1.07	0.8077	#VALUE!	fruur	D-Fructuronate	C00905
fruur[p]	780	NA	NA	1.0692	0.8077	#VALUE!	fruur	D-Fructuronate	C00905
fuc-L[c]	781	NA	NA	1.0683	0.8077	#VALUE!	fuc-L	L-Fucose	C01019
galctn-L[e]	825	NA	NA	1.0443	0.8077	#VALUE!	galctn-L	L-Galactonate	0
cbi[c]	481	NA	NA	1.2169	0.8077	#VALUE!	cbi	Cobinamide	C05774
gtp[e]	933	NA	NA	1.0061	0.8077	#VALUE!	gtp	GTP	C00044
cyan[c]	570	NA	NA	1.1674	0.8077	#VALUE!	cyan	Hydrogen cyanide	C01326
cyan[e]	571	NA	NA	1.1664	0.8077	#VALUE!	cyan	Hydrogen cyanide	C01326
cyan[p]	572	NA	NA	1.1654	0.8077	#VALUE!	cyan	Hydrogen cyanide	C01326
3ump[p]	233	NA	NA	1.3365	0.8077	#VALUE!	3ump	3'-UMP	C01368
acgam[e]	317	NA	NA	1.3004	0.8077	#VALUE!	acgam	N-Acetyl-D-glucosamine	C00140
acgam[p]	318	NA	NA	1.2991	0.8077	#VALUE!	acgam	N-Acetyl-D-glucosamine	C00140
acmalt[c]	321	NA	NA	1.2978	0.8077	#VALUE!	acmalt	Acetyl-maltose	C02130
acmana[c]	322	NA	NA	1.2966	0.8077	#VALUE!	acmana	N-Acetyl-D-mannosamine	C00645
agdpcbi[c]	361	NA	NA	1.2781	0.8077	#VALUE!	agdpcbi	Adenosine-GDP-cobinamide	C06510
acgal[p]	311	NA	NA	1.3041	0.8077	#VALUE!	acgal	N-Acetyl-D-galactosamine	C01132
acnam[c]	329	NA	NA	1.2904	0.8077	#VALUE!	acnam	N-Acetylneuraminate	C00270
dimp[e]	643	NA	NA	1.1378	0.8077	#VALUE!	dimp	dIMP	C06196
dimp[p]	644	NA	NA	1.1368	0.8077	#VALUE!	dimp	dIMP	C06196
g3ps[p]	805	NA	NA	1.0574	0.8077	#VALUE!	g3ps	Glycerophosphoserine	0
dgmp[p]	622	NA	NA	1.1426	0.8077	#VALUE!	dgmp	dGMP	C00362
alatrna[c]	385	NA	NA	1.2721	0.8077	#VALUE!	alatrna	L-Alanyl-tRNA(Ala)	C00886
but[p]	472	NA	NA	1.2236	0.8077	#VALUE!	but	Butyrate (n-C4:0)	C00246
cd2[c]	488	NA	NA	1.2126	0.8077	#VALUE!	cd2	Cadmium	C01413
glntrna[c]	877	NA	NA	1.0206	0.8077	#VALUE!	glntrna	L-Glutaminyl-tRNA(Gln)	C02282
arab-L[c]	426	NA	NA	1.2579	0.8077	#VALUE!	arab-L	L-Arabinose	C00259
dcaACP[c]	599	NA	NA	1.1524	0.8077	#VALUE!	dcaACP	Decanoyl-ACP (n-C10:0ACP)	C05755
ddca[e]	616	NA	NA	1.1446	0.8077	#VALUE!	ddca	Dodecanoate (n-C12:0)	C02679
3hddecACP[c]	191	NA	NA	1.3677	0.8077	#VALUE!	3hddecACP	(R)-3-Hydroxydodecanoyl-[acyl-carrier protein]	C05757
Nmtrp[c]	288	NA	NA	1.3169	0.8077	#VALUE!	Nmtrp	N-Methyltryptophan	C02983
acgal[e]	310	NA	NA	1.3054	0.8077	#VALUE!	acgal	N-Acetyl-D-galactosamine	C01132
adocbi[c]	349	NA	NA	1.2855	0.8077	#VALUE!	adocbi	Adenosyl cobinamide	C06508
adocbip[c]	350	NA	NA	1.2842	0.8077	#VALUE!	adocbip	Adenosyl cobinamide phosphate	C06509
arbtn[c]	431	NA	NA	1.252	0.8077	#VALUE!	arbtn	aerobactin minus Fe3	0
arbtn[e]	432	NA	NA	1.2508	0.8077	#VALUE!	arbtn	aerobactin minus Fe3	0
arbtn-fe3[p]	435	NA	NA	1.2474	0.8077	#VALUE!	arbtn-fe3	Aerobactin	C05554
arbtn[p]	436	NA	NA	1.2462	0.8077	#VALUE!	arbtn	aerobactin minus Fe3	0
btn[c]	466	NA	NA	1.2303	0.8077	#VALUE!	btn	Biotin	C00120
butso3[c]	473	NA	NA	1.2225	0.8077	#VALUE!	butso3	butanesulfonate	0
butso3[e]	474	NA	NA	1.2214	0.8077	#VALUE!	butso3	butanesulfonate	0
cinnm[c]	510	NA	NA	1.2018	0.8077	#VALUE!	cinnm	trans-Cinnamate	C00423
gal[p]	817	NA	NA	1.0508	0.8077	#VALUE!	gal	D-Galactose	C00124
glyb[e]	895	NA	NA	1.0167	0.8077	#VALUE!	glyb	Glycine betaine	C00719
btal[c]	464	NA	NA	1.2314	0.8077	#VALUE!	btal	Butanal	C01412
btnso[c]	467	NA	NA	1.2292	0.8077	#VALUE!	btnso	d-biotin d-sulfoxide	0
but2eACP[c]	468	NA	NA	1.228	0.8077	#VALUE!	but2eACP	But-2-enoyl-[acyl-carrier protein]	C04246
23cgmp[p]	63	NA	NA	1.4196	0.8077	#VALUE!	23cgmp	2',3'-Cyclic GMP	C06194
23cump[p]	65	NA	NA	1.4166	0.8077	#VALUE!	23cump	2',3'-Cyclic UMP	C02355
23dappa[e]	67	NA	NA	1.4136	0.8077	#VALUE!	23dappa	2,3-diaminopropionate	C06393
26dap-M[p]	83	NA	NA	1.4062	0.8077	#VALUE!	26dap-M	meso-2,6-Diaminoheptanedioate	C00680
2ddglcn[c]	120	NA	NA	1.4048	0.8077	#VALUE!	2ddglcn	2-Dehydro-3-deoxy-D-gluconate	C00204
Sfglutth[c]	289	NA	NA	1.3156	0.8077	#VALUE!	Sfglutth	S-Formylglutathione	C01031
aacald[c]	290	NA	NA	1.3143	0.8077	#VALUE!	aacald	Aminoacetaldehyde	C06735
arbt6p[c]	430	NA	NA	1.2532	0.8077	#VALUE!	arbt6p	Arbutin 6-phosphate	C06187
crn-D[c]	551	NA	NA	1.1848	0.8077	#VALUE!	crn-D	D-Carnitine	C00487
glcur1p[p]	870	NA	NA	1.0252	0.8077	#VALUE!	glcur1p	D-Glucuronate 1-phosphate	C05385
glcur[e]	872	NA	NA	1.0237	0.8077	#VALUE!	glcur	D-Glucuronate	C00191
23ccmp[e]	60	NA	NA	1.4241	0.8077	#VALUE!	23ccmp	2',3'-Cyclic CMP	C02354
4h2opntn[c]	243	NA	NA	1.3338	0.8077	#VALUE!	4h2opntn	4-Hydroxy-2-oxopentanoate	C03589
4mhetz[c]	249	NA	NA	1.3286	0.8077	#VALUE!	4mhetz	4-Methyl-5-(2-hydroxyethyl)-thiazole	C04294
all-D[e]	388	NA	NA	1.2697	0.8077	#VALUE!	all-D	D-Allose	C01487
asntrna[c]	448	NA	NA	1.2405	0.8077	#VALUE!	asntrna	L-Asparaginyl-tRNA(Asn)	C03402
aso3[c]	449	NA	NA	1.2393	0.8077	#VALUE!	aso3	arsenite	C06697
g1p[e]	788	NA	NA	1.0658	0.8077	#VALUE!	g1p	D-Glucose 1-phosphate	C00103
g1p[p]	789	NA	NA	1.065	0.8077	#VALUE!	g1p	D-Glucose 1-phosphate	C00103
g3pc[c]	791	NA	NA	1.0641	0.8077	#VALUE!	g3pc	sn-Glycero-3-phosphocholine	C00670
g3pc[e]	792	NA	NA	1.0633	0.8077	#VALUE!	g3pc	sn-Glycero-3-phosphocholine	C00670
glyb[c]	894	NA	NA	1.0175	0.8077	#VALUE!	glyb	Glycine betaine	C00719
14glucan[c]	23	NA	NA	1.4316	0.8077	#VALUE!	14glucan	1,4-alpha-D-glucan	0
14glucan[e]	24	NA	NA	1.4301	0.8077	#VALUE!	14glucan	1,4-alpha-D-glucan	0
14glucan[p]	25	NA	NA	1.4286	0.8077	#VALUE!	14glucan	1,4-alpha-D-glucan	0
23cump[e]	64	NA	NA	1.4181	0.8077	#VALUE!	23cump	2',3'-Cyclic UMP	C02355
23dappa[c]	66	NA	NA	1.4151	0.8077	#VALUE!	23dappa	2,3-diaminopropionate	C06393
23dappa[p]	68	NA	NA	1.4121	0.8077	#VALUE!	23dappa	2,3-diaminopropionate	C06393
23doguln[c]	76	NA	NA	1.4106	0.8077	#VALUE!	23doguln	2,3-Dioxo-L-gulonate	C05409
25dkglcn[c]	78	NA	NA	1.4092	0.8077	#VALUE!	25dkglcn	2,5-diketo-D-gluconate	C02780
26dap-M[e]	82	NA	NA	1.4077	0.8077	#VALUE!	26dap-M	meso-2,6-Diaminoheptanedioate	C00680
acac[c]	297	NA	NA	1.3117	0.8077	#VALUE!	acac	Acetoacetate	C00164
2ddglcn[p]	122	NA	NA	1.4018	0.8077	#VALUE!	2ddglcn	2-Dehydro-3-deoxy-D-gluconate	C00204
2dhglcn[c]	125	NA	NA	1.3989	0.8077	#VALUE!	2dhglcn	2-Dehydro-D-gluconate	C00629
3hcddec5eACP[c]	182	NA	NA	1.3775	0.8077	#VALUE!	3hcddec5eACP	(R)-3-hydroxy-cis-dodec-5-enoyl-[acyl-carrier protein]	0
3hcinnm[c]	183	NA	NA	1.3761	0.8077	#VALUE!	3hcinnm	3-hydroxycinnamic acid	0
all-D[c]	387	NA	NA	1.2709	0.8077	#VALUE!	all-D	D-Allose	C01487
dca[e]	601	NA	NA	1.1514	0.8077	#VALUE!	dca	Decanoate (n-C10:0)	C01571
dca[p]	602	NA	NA	1.1504	0.8077	#VALUE!	dca	Decanoate (n-C10:0)	C01571
dgmp[e]	621	NA	NA	1.1436	0.8077	#VALUE!	dgmp	dGMP	C00362
dgsn[e]	624	NA	NA	1.1417	0.8077	#VALUE!	dgsn	Deoxyguanosine	C00330
ethso3[c]	709	NA	NA	1.1097	0.8077	#VALUE!	ethso3	ethanesulfonate	0
ethso3[p]	711	NA	NA	1.1079	0.8077	#VALUE!	ethso3	ethanesulfonate	0
etoh[e]	713	NA	NA	1.107	0.8077	#VALUE!	etoh	Ethanol	C00469
f1p[c]	715	NA	NA	1.1051	0.8077	#VALUE!	f1p	D-Fructose 1-phosphate	C02976
f6p[e]	717	NA	NA	1.1042	0.8077	#VALUE!	f6p	D-Fructose 6-phosphate	C00085
fald[c]	721	NA	NA	1.1024	0.8077	#VALUE!	fald	Formaldehyde	C00067
fc1p[c]	724	NA	NA	1.0997	0.8077	#VALUE!	fc1p	L-Fuculose 1-phosphate	C01099
fe3dcit[p]	734	NA	NA	1.097	0.8077	#VALUE!	fe3dcit	Fe(III)dicitrate	C06229
fe3dhbzs[e]	736	NA	NA	1.0953	0.8077	#VALUE!	fe3dhbzs	ferric 2,3-dihydroxybenzoylserine	0
3ooctdACP[c]	223	NA	NA	1.3418	0.8077	#VALUE!	3ooctdACP	3-Oxooctadecanoyl-[acyl-carrier protein]	0
acnam[p]	331	NA	NA	1.2879	0.8077	#VALUE!	acnam	N-Acetylneuraminate	C00270
but[c]	470	NA	NA	1.2258	0.8077	#VALUE!	but	Butyrate (n-C4:0)	C00246
cbi[p]	483	NA	NA	1.2148	0.8077	#VALUE!	cbi	Cobinamide	C05774
cbl1[e]	485	NA	NA	1.2137	0.8077	#VALUE!	cbl1	Cob(I)alamin	C00853
ethso3[e]	710	NA	NA	1.1088	0.8077	#VALUE!	ethso3	ethanesulfonate	0
etoh[p]	714	NA	NA	1.106	0.8077	#VALUE!	etoh	Ethanol	C00469
f6p[p]	718	NA	NA	1.1033	0.8077	#VALUE!	f6p	D-Fructose 6-phosphate	C00085
fald[e]	722	NA	NA	1.1015	0.8077	#VALUE!	fald	Formaldehyde	C00067
fcl-L[c]	725	NA	NA	1.0988	0.8077	#VALUE!	fcl-L	L-fuculose	C01721
fe3dcit[e]	733	NA	NA	1.0979	0.8077	#VALUE!	fe3dcit	Fe(III)dicitrate	C06229
fe3dhbzs[c]	735	NA	NA	1.0961	0.8077	#VALUE!	fe3dhbzs	ferric 2,3-dihydroxybenzoylserine	0
fe3dhbzs[p]	737	NA	NA	1.0944	0.8077	#VALUE!	fe3dhbzs	ferric 2,3-dihydroxybenzoylserine	0
fe3hox[c]	738	NA	NA	1.0935	0.8077	#VALUE!	fe3hox	Fe(III)hydroxamate	C06227
fe3hox[p]	740	NA	NA	1.0917	0.8077	#VALUE!	fe3hox	Fe(III)hydroxamate	C06227
fe3hox-un[e]	742	NA	NA	1.0899	0.8077	#VALUE!	fe3hox-un	Fe(III)hydoxamate, unloaded	0
fecrm[c]	744	NA	NA	1.0882	0.8077	#VALUE!	fecrm	Ferrichrome	C06228
fecrm[p]	746	NA	NA	1.0864	0.8077	#VALUE!	fecrm	Ferrichrome	C06228
fecrm-un[e]	748	NA	NA	1.0847	0.8077	#VALUE!	fecrm-un	Ferrichrome minus Fe(III)	0
duri[p]	690	NA	NA	1.1115	0.8077	#VALUE!	duri	Deoxyuridine	C00526
fe3hox[e]	739	NA	NA	1.0926	0.8077	#VALUE!	fe3hox	Fe(III)hydroxamate	C06227
fe3hox-un[c]	741	NA	NA	1.0908	0.8077	#VALUE!	fe3hox-un	Fe(III)hydoxamate, unloaded	0
fe3hox-un[p]	743	NA	NA	1.0891	0.8077	#VALUE!	fe3hox-un	Fe(III)hydoxamate, unloaded	0
fecrm[e]	745	NA	NA	1.0873	0.8077	#VALUE!	fecrm	Ferrichrome	C06228
fecrm-un[c]	747	NA	NA	1.0855	0.8077	#VALUE!	fecrm-un	Ferrichrome minus Fe(III)	0
fecrm-un[p]	749	NA	NA	1.0838	0.8077	#VALUE!	fecrm-un	Ferrichrome minus Fe(III)	0
fldox[c]	760	NA	NA	1.0777	0.8077	#VALUE!	fldox	flavodoxin (oxidized)	C02869
ctbt[p]	561	NA	NA	1.1755	0.8077	#VALUE!	ctbt	crotonobetaine	C04114
dxyl[c]	693	NA	NA	1.1106	0.8077	#VALUE!	dxyl	1-deoxy-D-xylulose	C06257
cpgn-un[p]	548	NA	NA	1.1869	0.8077	#VALUE!	cpgn-un	coprogen unloaded (no Fe(III))	0
crnDcoa[c]	550	NA	NA	1.1859	0.8077	#VALUE!	crnDcoa	D-carnitinyl-CoA	0
crn[p]	555	NA	NA	1.1807	0.8077	#VALUE!	crn	L-Carnitine	C00318
cu[c]	567	NA	NA	1.1704	0.8077	#VALUE!	cu	Cu+	0
dcmp[e]	607	NA	NA	1.1495	0.8077	#VALUE!	dcmp	dCMP	C00239
feoxam-un[p]	758	NA	NA	1.0786	0.8077	#VALUE!	feoxam-un	ferroxamine minus Fe(3)	0
glcur1p[e]	869	NA	NA	1.026	0.8077	#VALUE!	glcur1p	D-Glucuronate 1-phosphate	C05385
glcur[c]	871	NA	NA	1.0245	0.8077	#VALUE!	glcur	D-Glucuronate	C00191
2ddglcn[e]	121	NA	NA	1.4033	0.8077	#VALUE!	2ddglcn	2-Dehydro-3-deoxy-D-gluconate	C00204
2dh3dgal[c]	124	NA	NA	1.4004	0.8077	#VALUE!	2dh3dgal	2-Dehydro-3-deoxy-D-galactonate	C01216
2dhguln[c]	126	NA	NA	1.3975	0.8077	#VALUE!	2dhguln	2-Dehydro-L-gulonate	0
23camp[p]	59	NA	NA	1.4256	0.8077	#VALUE!	23camp	2',3'-Cyclic AMP	C02353
3haACP[c]	180	NA	NA	1.3789	0.8077	#VALUE!	3haACP	(3R)-3-Hydroxyacyl-[acyl-carrier protein]	C01271
chol[p]	508	NA	NA	1.2028	0.8077	#VALUE!	chol	Choline	C00114
fmettrna[c]	762	NA	NA	1.076	0.8077	#VALUE!	fmettrna	N-Formylmethionyl-tRNA	C03294
g6p[p]	808	NA	NA	1.0558	0.8077	#VALUE!	g6p	D-Glucose 6-phosphate	C00092
gal[e]	816	NA	NA	1.0516	0.8077	#VALUE!	gal	D-Galactose	C00124
galt1p[c]	827	NA	NA	1.0427	0.8077	#VALUE!	galt1p	Galactitol 1-phosphate	C06311
12ppd-S[c]	19	NA	NA	1.4362	0.8077	#VALUE!	12ppd-S	(S)-Propane-1,2-diol	C02917
3hdecACP[c]	192	NA	NA	1.3663	0.8077	#VALUE!	3hdecACP	(R)-3-Hydroxydecanoyl-[acyl-carrier protein]	C04619
5mta[c]	269	NA	NA	1.3233	0.8077	#VALUE!	5mta	5-Methylthioadenosine	C00170
arbtn-fe3[e]	434	NA	NA	1.2485	0.8077	#VALUE!	arbtn-fe3	Aerobactin	C05554
betald[c]	462	NA	NA	1.2325	0.8077	#VALUE!	betald	Betaine aldehyde	C00576
butACP[c]	469	NA	NA	1.2269	0.8077	#VALUE!	butACP	Butyryl-ACP (n-C4:0ACP)	C05745
dhcinnm[c]	631	NA	NA	1.1397	0.8077	#VALUE!	dhcinnm	2,3-dihydroxicinnamic acid	0
galct-D[c]	818	NA	NA	1.05	0.8077	#VALUE!	galct-D	D-Galactarate	C00879
gdp[p]	847	NA	NA	1.0299	0.8077	#VALUE!	gdp	GDP	C00035
amob[c]	399	NA	NA	1.2649	0.8077	#VALUE!	amob	S-Adenosyl-4-methylthio-2-oxobutanoate	C04425
gal1p[e]	811	NA	NA	1.0549	0.8077	#VALUE!	gal1p	alpha-D-Galactose 1-phosphate	C00446
gal-bD[p]	814	NA	NA	1.0525	0.8077	#VALUE!	gal-bD	beta D-Galactose	C01582
gam[p]	838	NA	NA	1.0355	0.8077	#VALUE!	gam	D-Glucosamine	C00329
garagund[c]	840	NA	NA	1.0347	0.8077	#VALUE!	garagund	glucosyl-O-acetyl-rhamanosyl-N-acetylglucosamyl-undecaprenyl diphosphate	0
3cmp[e]	172	NA	NA	1.3874	0.8077	#VALUE!	3cmp	3'-cmp	C05822
3gmp[p]	179	NA	NA	1.3803	0.8077	#VALUE!	3gmp	3'-GMP	C06193
3hcinnm[e]	184	NA	NA	1.3747	0.8077	#VALUE!	3hcinnm	3-hydroxycinnamic acid	0
butso3[p]	475	NA	NA	1.2203	0.8077	#VALUE!	butso3	butanesulfonate	0
fldrd[c]	761	NA	NA	1.0769	0.8077	#VALUE!	fldrd	flavodoxin (reduced)	C02745
frulys[p]	776	NA	NA	1.0717	0.8077	#VALUE!	frulys	fructoselysine	0
glcr[c]	866	NA	NA	1.0284	0.8077	#VALUE!	glcr	D-Glucarate	C00818
3ocpalm9eACP[c]	211	NA	NA	1.3512	0.8077	#VALUE!	3ocpalm9eACP	3-oxo-cis-palm-9-eoyl-[acyl-carrier protein]	0
chol[c]	506	NA	NA	1.205	0.8077	#VALUE!	chol	Choline	C00114
chol[e]	507	NA	NA	1.2039	0.8077	#VALUE!	chol	Choline	C00114
cys-D[e]	577	NA	NA	1.1603	0.8077	#VALUE!	cys-D	D-Cysteine	C00793
cys-D[p]	578	NA	NA	1.1593	0.8077	#VALUE!	cys-D	D-Cysteine	C00793
g6p[e]	807	NA	NA	1.0566	0.8077	#VALUE!	g6p	D-Glucose 6-phosphate	C00092
3amp[e]	167	NA	NA	1.3903	0.8077	#VALUE!	3amp	3'-AMP	C01367
3amp[p]	168	NA	NA	1.3888	0.8077	#VALUE!	3amp	3'-AMP	C01367
gal-bD[e]	813	NA	NA	1.0533	0.8077	#VALUE!	gal-bD	beta D-Galactose	C01582
galt[e]	828	NA	NA	1.0419	0.8077	#VALUE!	galt	Galactitol	C01697
dcyt[e]	611	NA	NA	1.1475	0.8077	#VALUE!	dcyt	Deoxycytidine	C00881
dcmp[p]	608	NA	NA	1.1485	0.8077	#VALUE!	dcmp	dCMP	C00239
NA	NA	NA	NA	NA	NA	#VALUE!	NA	#N/A	#N/A
NA	NA	NA	NA	NA	NA	#VALUE!	NA	#N/A	#N/A
NA	NA	NA	NA	NA	NA	#VALUE!	NA	#N/A	#N/A
NA	NA	NA	NA	NA	NA	#VALUE!	NA	#N/A	#N/A
NA	NA	NA	NA	NA	NA	#VALUE!	NA	#N/A	#N/A
NA	NA	NA	NA	NA	NA	#VALUE!	NA	#N/A	#N/A
NA	NA	NA	NA	NA	NA	#VALUE!	NA	#N/A	#N/A
NA	NA	NA	NA	NA	NA	#VALUE!	NA	#N/A	#N/A
NA	NA	NA	NA	NA	NA	#VALUE!	NA	#N/A	#N/A
NA	NA	NA	NA	NA	NA	#VALUE!	NA	#N/A	#N/A
NA	NA	NA	NA	NA	NA	#VALUE!	NA	#N/A	#N/A
NA	NA	NA	NA	NA	NA	#VALUE!	NA	#N/A	#N/A
NA	NA	NA	NA	NA	NA	#VALUE!	NA	#N/A	#N/A
NA	NA	NA	NA	NA	NA	#VALUE!	NA	#N/A	#N/A
NA	NA	NA	NA	NA	NA	#VALUE!	NA	#N/A	#N/A
NA	NA	NA	NA	NA	NA	#VALUE!	NA	#N/A	#N/A
NA	NA	NA	NA	NA	NA	#VALUE!	NA	#N/A	#N/A
NA	NA	NA	NA	NA	NA	#VALUE!	NA	#N/A	#N/A
NA	NA	NA	NA	NA	NA	#VALUE!	NA	#N/A	#N/A
NA	NA	NA	NA	NA	NA	#VALUE!	NA	#N/A	#N/A
NA	NA	NA	NA	NA	NA	#VALUE!	NA	#N/A	#N/A
NA	NA	NA	NA	NA	NA	#VALUE!	NA	#N/A	#N/A
NA	NA	NA	NA	NA	NA	#VALUE!	NA	#N/A	#N/A
NA	NA	NA	NA	NA	NA	#VALUE!	NA	#N/A	#N/A
NA	NA	NA	NA	NA	NA	#VALUE!	NA	#N/A	#N/A
NA	NA	NA	NA	NA	NA	#VALUE!	NA	#N/A	#N/A
NA	NA	NA	NA	NA	NA	#VALUE!	NA	#N/A	#N/A
NA	NA	NA	NA	NA	NA	#VALUE!	NA	#N/A	#N/A
NA	NA	NA	NA	NA	NA	#VALUE!	NA	#N/A	#N/A
NA	NA	NA	NA	NA	NA	#VALUE!	NA	#N/A	#N/A
NA	NA	NA	NA	NA	NA	#VALUE!	NA	#N/A	#N/A
NA	NA	NA	NA	NA	NA	#VALUE!	NA	#N/A	#N/A
NA	NA	NA	NA	NA	NA	#VALUE!	NA	#N/A	#N/A
NA	NA	NA	NA	NA	NA	#VALUE!	NA	#N/A	#N/A
NA	NA	NA	NA	NA	NA	#VALUE!	NA	#N/A	#N/A
NA	NA	NA	NA	NA	NA	#VALUE!	NA	#N/A	#N/A
NA	NA	NA	NA	NA	NA	#VALUE!	NA	#N/A	#N/A
NA	NA	NA	NA	NA	NA	#VALUE!	NA	#N/A	#N/A
NA	NA	NA	NA	NA	NA	#VALUE!	NA	#N/A	#N/A
NA	NA	NA	NA	NA	NA	#VALUE!	NA	#N/A	#N/A
NA	NA	NA	NA	NA	NA	#VALUE!	NA	#N/A	#N/A
NA	NA	NA	NA	NA	NA	#VALUE!	NA	#N/A	#N/A
NA	NA	NA	NA	NA	NA	#VALUE!	NA	#N/A	#N/A
NA	NA	NA	NA	NA	NA	#VALUE!	NA	#N/A	#N/A
NA	NA	NA	NA	NA	NA	#VALUE!	NA	#N/A	#N/A
NA	NA	NA	NA	NA	NA	#VALUE!	NA	#N/A	#N/A
NA	NA	NA	NA	NA	NA	#VALUE!	NA	#N/A	#N/A
NA	NA	NA	NA	NA	NA	#VALUE!	NA	#N/A	#N/A
NA	NA	NA	NA	NA	NA	#VALUE!	NA	#N/A	#N/A
NA	NA	NA	NA	NA	NA	#VALUE!	NA	#N/A	#N/A
NA	NA	NA	NA	NA	NA	#VALUE!	NA	#N/A	#N/A
NA	NA	NA	NA	NA	NA	#VALUE!	NA	#N/A	#N/A
NA	NA	NA	NA	NA	NA	#VALUE!	NA	#N/A	#N/A
NA	NA	NA	NA	NA	NA	#VALUE!	NA	#N/A	#N/A
NA	NA	NA	NA	NA	NA	#VALUE!	NA	#N/A	#N/A
NA	NA	NA	NA	NA	NA	#VALUE!	NA	#N/A	#N/A
NA	NA	NA	NA	NA	NA	#VALUE!	NA	#N/A	#N/A
NA	NA	NA	NA	NA	NA	#VALUE!	NA	#N/A	#N/A
NA	NA	NA	NA	NA	NA	#VALUE!	NA	#N/A	#N/A
NA	NA	NA	NA	NA	NA	#VALUE!	NA	#N/A	#N/A
NA	NA	NA	NA	NA	NA	#VALUE!	NA	#N/A	#N/A
NA	NA	NA	NA	NA	NA	#VALUE!	NA	#N/A	#N/A
NA	NA	NA	NA	NA	NA	#VALUE!	NA	#N/A	#N/A
NA	NA	NA	NA	NA	NA	#VALUE!	NA	#N/A	#N/A
NA	NA	NA	NA	NA	NA	#VALUE!	NA	#N/A	#N/A
NA	NA	NA	NA	NA	NA	#VALUE!	NA	#N/A	#N/A
NA	NA	NA	NA	NA	NA	#VALUE!	NA	#N/A	#N/A
NA	NA	NA	NA	NA	NA	#VALUE!	NA	#N/A	#N/A
NA	NA	NA	NA	NA	NA	#VALUE!	NA	#N/A	#N/A
NA	NA	NA	NA	NA	NA	#VALUE!	NA	#N/A	#N/A
NA	NA	NA	NA	NA	NA	#VALUE!	NA	#N/A	#N/A
NA	NA	NA	NA	NA	NA	#VALUE!	NA	#N/A	#N/A
NA	NA	NA	NA	NA	NA	#VALUE!	NA	#N/A	#N/A
NA	NA	NA	NA	NA	NA	#VALUE!	NA	#N/A	#N/A
NA	NA	NA	NA	NA	NA	#VALUE!	NA	#N/A	#N/A
NA	NA	NA	NA	NA	NA	#VALUE!	NA	#N/A	#N/A
NA	NA	NA	NA	NA	NA	#VALUE!	NA	#N/A	#N/A
NA	NA	NA	NA	NA	NA	#VALUE!	NA	#N/A	#N/A
NA	NA	NA	NA	NA	NA	#VALUE!	NA	#N/A	#N/A
NA	NA	NA	NA	NA	NA	#VALUE!	NA	#N/A	#N/A
NA	NA	NA	NA	NA	NA	#VALUE!	NA	#N/A	#N/A
NA	NA	NA	NA	NA	NA	#VALUE!	NA	#N/A	#N/A
NA	NA	NA	NA	NA	NA	#VALUE!	NA	#N/A	#N/A
NA	NA	NA	NA	NA	NA	#VALUE!	NA	#N/A	#N/A
NA	NA	NA	NA	NA	NA	#VALUE!	NA	#N/A	#N/A
NA	NA	NA	NA	NA	NA	#VALUE!	NA	#N/A	#N/A
NA	NA	NA	NA	NA	NA	#VALUE!	NA	#N/A	#N/A
NA	NA	NA	NA	NA	NA	#VALUE!	NA	#N/A	#N/A
NA	NA	NA	NA	NA	NA	#VALUE!	NA	#N/A	#N/A
NA	NA	NA	NA	NA	NA	#VALUE!	NA	#N/A	#N/A
NA	NA	NA	NA	NA	NA	#VALUE!	NA	#N/A	#N/A
NA	NA	NA	NA	NA	NA	#VALUE!	NA	#N/A	#N/A
NA	NA	NA	NA	NA	NA	#VALUE!	NA	#N/A	#N/A
NA	NA	NA	NA	NA	NA	#VALUE!	NA	#N/A	#N/A
NA	NA	NA	NA	NA	NA	#VALUE!	NA	#N/A	#N/A
NA	NA	NA	NA	NA	NA	#VALUE!	NA	#N/A	#N/A
NA	NA	NA	NA	NA	NA	#VALUE!	NA	#N/A	#N/A
NA	NA	NA	NA	NA	NA	#VALUE!	NA	#N/A	#N/A
NA	NA	NA	NA	NA	NA	#VALUE!	NA	#N/A	#N/A
NA	NA	NA	NA	NA	NA	#VALUE!	NA	#N/A	#N/A
NA	NA	NA	NA	NA	NA	#VALUE!	NA	#N/A	#N/A
NA	NA	NA	NA	NA	NA	#VALUE!	NA	#N/A	#N/A
NA	NA	NA	NA	NA	NA	#VALUE!	NA	#N/A	#N/A
NA	NA	NA	NA	NA	NA	#VALUE!	NA	#N/A	#N/A
NA	NA	NA	NA	NA	NA	#VALUE!	NA	#N/A	#N/A
NA	NA	NA	NA	NA	NA	#VALUE!	NA	#N/A	#N/A
NA	NA	NA	NA	NA	NA	#VALUE!	NA	#N/A	#N/A
NA	NA	NA	NA	NA	NA	#VALUE!	NA	#N/A	#N/A
NA	NA	NA	NA	NA	NA	#VALUE!	NA	#N/A	#N/A
NA	NA	NA	NA	NA	NA	#VALUE!	NA	#N/A	#N/A
NA	NA	NA	NA	NA	NA	#VALUE!	NA	#N/A	#N/A
NA	NA	NA	NA	NA	NA	#VALUE!	NA	#N/A	#N/A
NA	NA	NA	NA	NA	NA	#VALUE!	NA	#N/A	#N/A
NA	NA	NA	NA	NA	NA	#VALUE!	NA	#N/A	#N/A
NA	NA	NA	NA	NA	NA	#VALUE!	NA	#N/A	#N/A
NA	NA	NA	NA	NA	NA	#VALUE!	NA	#N/A	#N/A
NA	NA	NA	NA	NA	NA	#VALUE!	NA	#N/A	#N/A
NA	NA	NA	NA	NA	NA	#VALUE!	NA	#N/A	#N/A
NA	NA	NA	NA	NA	NA	#VALUE!	NA	#N/A	#N/A
NA	NA	NA	NA	NA	NA	#VALUE!	NA	#N/A	#N/A
NA	NA	NA	NA	NA	NA	#VALUE!	NA	#N/A	#N/A
NA	NA	NA	NA	NA	NA	#VALUE!	NA	#N/A	#N/A
NA	NA	NA	NA	NA	NA	#VALUE!	NA	#N/A	#N/A
NA	NA	NA	NA	NA	NA	#VALUE!	NA	#N/A	#N/A
NA	NA	NA	NA	NA	NA	#VALUE!	NA	#N/A	#N/A
NA	NA	NA	NA	NA	NA	#VALUE!	NA	#N/A	#N/A
NA	NA	NA	NA	NA	NA	#VALUE!	NA	#N/A	#N/A
NA	NA	NA	NA	NA	NA	#VALUE!	NA	#N/A	#N/A
NA	NA	NA	NA	NA	NA	#VALUE!	NA	#N/A	#N/A
NA	NA	NA	NA	NA	NA	#VALUE!	NA	#N/A	#N/A
NA	NA	NA	NA	NA	NA	#VALUE!	NA	#N/A	#N/A
NA	NA	NA	NA	NA	NA	#VALUE!	NA	#N/A	#N/A
NA	NA	NA	NA	NA	NA	#VALUE!	NA	#N/A	#N/A
NA	NA	NA	NA	NA	NA	#VALUE!	NA	#N/A	#N/A
NA	NA	NA	NA	NA	NA	#VALUE!	NA	#N/A	#N/A
NA	NA	NA	NA	NA	NA	#VALUE!	NA	#N/A	#N/A
NA	NA	NA	NA	NA	NA	#VALUE!	NA	#N/A	#N/A
NA	NA	NA	NA	NA	NA	#VALUE!	NA	#N/A	#N/A
NA	NA	NA	NA	NA	NA	#VALUE!	NA	#N/A	#N/A
NA	NA	NA	NA	NA	NA	#VALUE!	NA	#N/A	#N/A
NA	NA	NA	NA	NA	NA	#VALUE!	NA	#N/A	#N/A
NA	NA	NA	NA	NA	NA	#VALUE!	NA	#N/A	#N/A
NA	NA	NA	NA	NA	NA	#VALUE!	NA	#N/A	#N/A
NA	NA	NA	NA	NA	NA	#VALUE!	NA	#N/A	#N/A
NA	NA	NA	NA	NA	NA	#VALUE!	NA	#N/A	#N/A
NA	NA	NA	NA	NA	NA	#VALUE!	NA	#N/A	#N/A
NA	NA	NA	NA	NA	NA	#VALUE!	NA	#N/A	#N/A
NA	NA	NA	NA	NA	NA	#VALUE!	NA	#N/A	#N/A
NA	NA	NA	NA	NA	NA	#VALUE!	NA	#N/A	#N/A
NA	NA	NA	NA	NA	NA	#VALUE!	NA	#N/A	#N/A
NA	NA	NA	NA	NA	NA	#VALUE!	NA	#N/A	#N/A
NA	NA	NA	NA	NA	NA	#VALUE!	NA	#N/A	#N/A
NA	NA	NA	NA	NA	NA	#VALUE!	NA	#N/A	#N/A
NA	NA	NA	NA	NA	NA	#VALUE!	NA	#N/A	#N/A
NA	NA	NA	NA	NA	NA	#VALUE!	NA	#N/A	#N/A
NA	NA	NA	NA	NA	NA	#VALUE!	NA	#N/A	#N/A
NA	NA	NA	NA	NA	NA	#VALUE!	NA	#N/A	#N/A
NA	NA	NA	NA	NA	NA	#VALUE!	NA	#N/A	#N/A
NA	NA	NA	NA	NA	NA	#VALUE!	NA	#N/A	#N/A
NA	NA	NA	NA	NA	NA	#VALUE!	NA	#N/A	#N/A
NA	NA	NA	NA	NA	NA	#VALUE!	NA	#N/A	#N/A
NA	NA	NA	NA	NA	NA	#VALUE!	NA	#N/A	#N/A
NA	NA	NA	NA	NA	NA	#VALUE!	NA	#N/A	#N/A
NA	NA	NA	NA	NA	NA	#VALUE!	NA	#N/A	#N/A
NA	NA	NA	NA	NA	NA	#VALUE!	NA	#N/A	#N/A
NA	NA	NA	NA	NA	NA	#VALUE!	NA	#N/A	#N/A
NA	NA	NA	NA	NA	NA	#VALUE!	NA	#N/A	#N/A
NA	NA	NA	NA	NA	NA	#VALUE!	NA	#N/A	#N/A
NA	NA	NA	NA	NA	NA	#VALUE!	NA	#N/A	#N/A
NA	NA	NA	NA	NA	NA	#VALUE!	NA	#N/A	#N/A
NA	NA	NA	NA	NA	NA	#VALUE!	NA	#N/A	#N/A
NA	NA	NA	NA	NA	NA	#VALUE!	NA	#N/A	#N/A
NA	NA	NA	NA	NA	NA	#VALUE!	NA	#N/A	#N/A
NA	NA	NA	NA	NA	NA	#VALUE!	NA	#N/A	#N/A
NA	NA	NA	NA	NA	NA	#VALUE!	NA	#N/A	#N/A
NA	NA	NA	NA	NA	NA	#VALUE!	NA	#N/A	#N/A
NA	NA	NA	NA	NA	NA	#VALUE!	NA	#N/A	#N/A
NA	NA	NA	NA	NA	NA	#VALUE!	NA	#N/A	#N/A
NA	NA	NA	NA	NA	NA	#VALUE!	NA	#N/A	#N/A
NA	NA	NA	NA	NA	NA	#VALUE!	NA	#N/A	#N/A
NA	NA	NA	NA	NA	NA	#VALUE!	NA	#N/A	#N/A
NA	NA	NA	NA	NA	NA	#VALUE!	NA	#N/A	#N/A
NA	NA	NA	NA	NA	NA	#VALUE!	NA	#N/A	#N/A
NA	NA	NA	NA	NA	NA	#VALUE!	NA	#N/A	#N/A
NA	NA	NA	NA	NA	NA	#VALUE!	NA	#N/A	#N/A
NA	NA	NA	NA	NA	NA	#VALUE!	NA	#N/A	#N/A
NA	NA	NA	NA	NA	NA	#VALUE!	NA	#N/A	#N/A
NA	NA	NA	NA	NA	NA	#VALUE!	NA	#N/A	#N/A
NA	NA	NA	NA	NA	NA	#VALUE!	NA	#N/A	#N/A
NA	NA	NA	NA	NA	NA	#VALUE!	NA	#N/A	#N/A
NA	NA	NA	NA	NA	NA	#VALUE!	NA	#N/A	#N/A
NA	NA	NA	NA	NA	NA	#VALUE!	NA	#N/A	#N/A
NA	NA	NA	NA	NA	NA	#VALUE!	NA	#N/A	#N/A
NA	NA	NA	NA	NA	NA	#VALUE!	NA	#N/A	#N/A
NA	NA	NA	NA	NA	NA	#VALUE!	NA	#N/A	#N/A
NA	NA	NA	NA	NA	NA	#VALUE!	NA	#N/A	#N/A
NA	NA	NA	NA	NA	NA	#VALUE!	NA	#N/A	#N/A
NA	NA	NA	NA	NA	NA	#VALUE!	NA	#N/A	#N/A
NA	NA	NA	NA	NA	NA	#VALUE!	NA	#N/A	#N/A
NA	NA	NA	NA	NA	NA	#VALUE!	NA	#N/A	#N/A
NA	NA	NA	NA	NA	NA	#VALUE!	NA	#N/A	#N/A
NA	NA	NA	NA	NA	NA	#VALUE!	NA	#N/A	#N/A
NA	NA	NA	NA	NA	NA	#VALUE!	NA	#N/A	#N/A
NA	NA	NA	NA	NA	NA	#VALUE!	NA	#N/A	#N/A
NA	NA	NA	NA	NA	NA	#VALUE!	NA	#N/A	#N/A
NA	NA	NA	NA	NA	NA	#VALUE!	NA	#N/A	#N/A
NA	NA	NA	NA	NA	NA	#VALUE!	NA	#N/A	#N/A
NA	NA	NA	NA	NA	NA	#VALUE!	NA	#N/A	#N/A
NA	NA	NA	NA	NA	NA	#VALUE!	NA	#N/A	#N/A
NA	NA	NA	NA	NA	NA	#VALUE!	NA	#N/A	#N/A
NA	NA	NA	NA	NA	NA	#VALUE!	NA	#N/A	#N/A
NA	NA	NA	NA	NA	NA	#VALUE!	NA	#N/A	#N/A
NA	NA	NA	NA	NA	NA	#VALUE!	NA	#N/A	#N/A
NA	NA	NA	NA	NA	NA	#VALUE!	NA	#N/A	#N/A
NA	NA	NA	NA	NA	NA	#VALUE!	NA	#N/A	#N/A
NA	NA	NA	NA	NA	NA	#VALUE!	NA	#N/A	#N/A
NA	NA	NA	NA	NA	NA	#VALUE!	NA	#N/A	#N/A
NA	NA	NA	NA	NA	NA	#VALUE!	NA	#N/A	#N/A
NA	NA	NA	NA	NA	NA	#VALUE!	NA	#N/A	#N/A
NA	NA	NA	NA	NA	NA	#VALUE!	NA	#N/A	#N/A
NA	NA	NA	NA	NA	NA	#VALUE!	NA	#N/A	#N/A
NA	NA	NA	NA	NA	NA	#VALUE!	NA	#N/A	#N/A
NA	NA	NA	NA	NA	NA	#VALUE!	NA	#N/A	#N/A
NA	NA	NA	NA	NA	NA	#VALUE!	NA	#N/A	#N/A
NA	NA	NA	NA	NA	NA	#VALUE!	NA	#N/A	#N/A
NA	NA	NA	NA	NA	NA	#VALUE!	NA	#N/A	#N/A
NA	NA	NA	NA	NA	NA	#VALUE!	NA	#N/A	#N/A
NA	NA	NA	NA	NA	NA	#VALUE!	NA	#N/A	#N/A
NA	NA	NA	NA	NA	NA	#VALUE!	NA	#N/A	#N/A
NA	NA	NA	NA	NA	NA	#VALUE!	NA	#N/A	#N/A
NA	NA	NA	NA	NA	NA	#VALUE!	NA	#N/A	#N/A
NA	NA	NA	NA	NA	NA	#VALUE!	NA	#N/A	#N/A
NA	NA	NA	NA	NA	NA	#VALUE!	NA	#N/A	#N/A
NA	NA	NA	NA	NA	NA	#VALUE!	NA	#N/A	#N/A
NA	NA	NA	NA	NA	NA	#VALUE!	NA	#N/A	#N/A
NA	NA	NA	NA	NA	NA	#VALUE!	NA	#N/A	#N/A
NA	NA	NA	NA	NA	NA	#VALUE!	NA	#N/A	#N/A
NA	NA	NA	NA	NA	NA	#VALUE!	NA	#N/A	#N/A
NA	NA	NA	NA	NA	NA	#VALUE!	NA	#N/A	#N/A
NA	NA	NA	NA	NA	NA	#VALUE!	NA	#N/A	#N/A
NA	NA	NA	NA	NA	NA	#VALUE!	NA	#N/A	#N/A
NA	NA	NA	NA	NA	NA	#VALUE!	NA	#N/A	#N/A
NA	NA	NA	NA	NA	NA	#VALUE!	NA	#N/A	#N/A
NA	NA	NA	NA	NA	NA	#VALUE!	NA	#N/A	#N/A
NA	NA	NA	NA	NA	NA	#VALUE!	NA	#N/A	#N/A
NA	NA	NA	NA	NA	NA	#VALUE!	NA	#N/A	#N/A
NA	NA	NA	NA	NA	NA	#VALUE!	NA	#N/A	#N/A
NA	NA	NA	NA	NA	NA	#VALUE!	NA	#N/A	#N/A
NA	NA	NA	NA	NA	NA	#VALUE!	NA	#N/A	#N/A
NA	NA	NA	NA	NA	NA	#VALUE!	NA	#N/A	#N/A
NA	NA	NA	NA	NA	NA	#VALUE!	NA	#N/A	#N/A
NA	NA	NA	NA	NA	NA	#VALUE!	NA	#N/A	#N/A
NA	NA	NA	NA	NA	NA	#VALUE!	NA	#N/A	#N/A
NA	NA	NA	NA	NA	NA	#VALUE!	NA	#N/A	#N/A
NA	NA	NA	NA	NA	NA	#VALUE!	NA	#N/A	#N/A
NA	NA	NA	NA	NA	NA	#VALUE!	NA	#N/A	#N/A
NA	NA	NA	NA	NA	NA	#VALUE!	NA	#N/A	#N/A
NA	NA	NA	NA	NA	NA	#VALUE!	NA	#N/A	#N/A
NA	NA	NA	NA	NA	NA	#VALUE!	NA	#N/A	#N/A
NA	NA	NA	NA	NA	NA	#VALUE!	NA	#N/A	#N/A
NA	NA	NA	NA	NA	NA	#VALUE!	NA	#N/A	#N/A
NA	NA	NA	NA	NA	NA	#VALUE!	NA	#N/A	#N/A
NA	NA	NA	NA	NA	NA	#VALUE!	NA	#N/A	#N/A
NA	NA	NA	NA	NA	NA	#VALUE!	NA	#N/A	#N/A
NA	NA	NA	NA	NA	NA	#VALUE!	NA	#N/A	#N/A
NA	NA	NA	NA	NA	NA	#VALUE!	NA	#N/A	#N/A
NA	NA	NA	NA	NA	NA	#VALUE!	NA	#N/A	#N/A
NA	NA	NA	NA	NA	NA	#VALUE!	NA	#N/A	#N/A
NA	NA	NA	NA	NA	NA	#VALUE!	NA	#N/A	#N/A
NA	NA	NA	NA	NA	NA	#VALUE!	NA	#N/A	#N/A
NA	NA	NA	NA	NA	NA	#VALUE!	NA	#N/A	#N/A
NA	NA	NA	NA	NA	NA	#VALUE!	NA	#N/A	#N/A
NA	NA	NA	NA	NA	NA	#VALUE!	NA	#N/A	#N/A
NA	NA	NA	NA	NA	NA	#VALUE!	NA	#N/A	#N/A
NA	NA	NA	NA	NA	NA	#VALUE!	NA	#N/A	#N/A
NA	NA	NA	NA	NA	NA	#VALUE!	NA	#N/A	#N/A
NA	NA	NA	NA	NA	NA	#VALUE!	NA	#N/A	#N/A
NA	NA	NA	NA	NA	NA	#VALUE!	NA	#N/A	#N/A
NA	NA	NA	NA	NA	NA	#VALUE!	NA	#N/A	#N/A
NA	NA	NA	NA	NA	NA	#VALUE!	NA	#N/A	#N/A
NA	NA	NA	NA	NA	NA	#VALUE!	NA	#N/A	#N/A
NA	NA	NA	NA	NA	NA	#VALUE!	NA	#N/A	#N/A
NA	NA	NA	NA	NA	NA	#VALUE!	NA	#N/A	#N/A
NA	NA	NA	NA	NA	NA	#VALUE!	NA	#N/A	#N/A
NA	NA	NA	NA	NA	NA	#VALUE!	NA	#N/A	#N/A
NA	NA	NA	NA	NA	NA	#VALUE!	NA	#N/A	#N/A
NA	NA	NA	NA	NA	NA	#VALUE!	NA	#N/A	#N/A
NA	NA	NA	NA	NA	NA	#VALUE!	NA	#N/A	#N/A
NA	NA	NA	NA	NA	NA	#VALUE!	NA	#N/A	#N/A
NA	NA	NA	NA	NA	NA	#VALUE!	NA	#N/A	#N/A
NA	NA	NA	NA	NA	NA	#VALUE!	NA	#N/A	#N/A
NA	NA	NA	NA	NA	NA	#VALUE!	NA	#N/A	#N/A
NA	NA	NA	NA	NA	NA	#VALUE!	NA	#N/A	#N/A
NA	NA	NA	NA	NA	NA	#VALUE!	NA	#N/A	#N/A
NA	NA	NA	NA	NA	NA	#VALUE!	NA	#N/A	#N/A
NA	NA	NA	NA	NA	NA	#VALUE!	NA	#N/A	#N/A
NA	NA	NA	NA	NA	NA	#VALUE!	NA	#N/A	#N/A
NA	NA	NA	NA	NA	NA	#VALUE!	NA	#N/A	#N/A
NA	NA	NA	NA	NA	NA	#VALUE!	NA	#N/A	#N/A
NA	NA	NA	NA	NA	NA	#VALUE!	NA	#N/A	#N/A
NA	NA	NA	NA	NA	NA	#VALUE!	NA	#N/A	#N/A
NA	NA	NA	NA	NA	NA	#VALUE!	NA	#N/A	#N/A
NA	NA	NA	NA	NA	NA	#VALUE!	NA	#N/A	#N/A
NA	NA	NA	NA	NA	NA	#VALUE!	NA	#N/A	#N/A
NA	NA	NA	NA	NA	NA	#VALUE!	NA	#N/A	#N/A
NA	NA	NA	NA	NA	NA	#VALUE!	NA	#N/A	#N/A
NA	NA	NA	NA	NA	NA	#VALUE!	NA	#N/A	#N/A
NA	NA	NA	NA	NA	NA	#VALUE!	NA	#N/A	#N/A
NA	NA	NA	NA	NA	NA	#VALUE!	NA	#N/A	#N/A
NA	NA	NA	NA	NA	NA	#VALUE!	NA	#N/A	#N/A
NA	NA	NA	NA	NA	NA	#VALUE!	NA	#N/A	#N/A
NA	NA	NA	NA	NA	NA	#VALUE!	NA	#N/A	#N/A
NA	NA	NA	NA	NA	NA	#VALUE!	NA	#N/A	#N/A
NA	NA	NA	NA	NA	NA	#VALUE!	NA	#N/A	#N/A
NA	NA	NA	NA	NA	NA	#VALUE!	NA	#N/A	#N/A
NA	NA	NA	NA	NA	NA	#VALUE!	NA	#N/A	#N/A
NA	NA	NA	NA	NA	NA	#VALUE!	NA	#N/A	#N/A
NA	NA	NA	NA	NA	NA	#VALUE!	NA	#N/A	#N/A
NA	NA	NA	NA	NA	NA	#VALUE!	NA	#N/A	#N/A
NA	NA	NA	NA	NA	NA	#VALUE!	NA	#N/A	#N/A
NA	NA	NA	NA	NA	NA	#VALUE!	NA	#N/A	#N/A
NA	NA	NA	NA	NA	NA	#VALUE!	NA	#N/A	#N/A
NA	NA	NA	NA	NA	NA	#VALUE!	NA	#N/A	#N/A
NA	NA	NA	NA	NA	NA	#VALUE!	NA	#N/A	#N/A
NA	NA	NA	NA	NA	NA	#VALUE!	NA	#N/A	#N/A
NA	NA	NA	NA	NA	NA	#VALUE!	NA	#N/A	#N/A
NA	NA	NA	NA	NA	NA	#VALUE!	NA	#N/A	#N/A
NA	NA	NA	NA	NA	NA	#VALUE!	NA	#N/A	#N/A
NA	NA	NA	NA	NA	NA	#VALUE!	NA	#N/A	#N/A
NA	NA	NA	NA	NA	NA	#VALUE!	NA	#N/A	#N/A
NA	NA	NA	NA	NA	NA	#VALUE!	NA	#N/A	#N/A
NA	NA	NA	NA	NA	NA	#VALUE!	NA	#N/A	#N/A
NA	NA	NA	NA	NA	NA	#VALUE!	NA	#N/A	#N/A
NA	NA	NA	NA	NA	NA	#VALUE!	NA	#N/A	#N/A
NA	NA	NA	NA	NA	NA	#VALUE!	NA	#N/A	#N/A
NA	NA	NA	NA	NA	NA	#VALUE!	NA	#N/A	#N/A
NA	NA	NA	NA	NA	NA	#VALUE!	NA	#N/A	#N/A
NA	NA	NA	NA	NA	NA	#VALUE!	NA	#N/A	#N/A
NA	NA	NA	NA	NA	NA	#VALUE!	NA	#N/A	#N/A
NA	NA	NA	NA	NA	NA	#VALUE!	NA	#N/A	#N/A
NA	NA	NA	NA	NA	NA	#VALUE!	NA	#N/A	#N/A
NA	NA	NA	NA	NA	NA	#VALUE!	NA	#N/A	#N/A
NA	NA	NA	NA	NA	NA	#VALUE!	NA	#N/A	#N/A
NA	NA	NA	NA	NA	NA	#VALUE!	NA	#N/A	#N/A
NA	NA	NA	NA	NA	NA	#VALUE!	NA	#N/A	#N/A
NA	NA	NA	NA	NA	NA	#VALUE!	NA	#N/A	#N/A
NA	NA	NA	NA	NA	NA	#VALUE!	NA	#N/A	#N/A
NA	NA	NA	NA	NA	NA	#VALUE!	NA	#N/A	#N/A
NA	NA	NA	NA	NA	NA	#VALUE!	NA	#N/A	#N/A
NA	NA	NA	NA	NA	NA	#VALUE!	NA	#N/A	#N/A
NA	NA	NA	NA	NA	NA	#VALUE!	NA	#N/A	#N/A
NA	NA	NA	NA	NA	NA	#VALUE!	NA	#N/A	#N/A
NA	NA	NA	NA	NA	NA	#VALUE!	NA	#N/A	#N/A
NA	NA	NA	NA	NA	NA	#VALUE!	NA	#N/A	#N/A
NA	NA	NA	NA	NA	NA	#VALUE!	NA	#N/A	#N/A
NA	NA	NA	NA	NA	NA	#VALUE!	NA	#N/A	#N/A
NA	NA	NA	NA	NA	NA	#VALUE!	NA	#N/A	#N/A
NA	NA	NA	NA	NA	NA	#VALUE!	NA	#N/A	#N/A
NA	NA	NA	NA	NA	NA	#VALUE!	NA	#N/A	#N/A
NA	NA	NA	NA	NA	NA	#VALUE!	NA	#N/A	#N/A
NA	NA	NA	NA	NA	NA	#VALUE!	NA	#N/A	#N/A
NA	NA	NA	NA	NA	NA	#VALUE!	NA	#N/A	#N/A
NA	NA	NA	NA	NA	NA	#VALUE!	NA	#N/A	#N/A
NA	NA	NA	NA	NA	NA	#VALUE!	NA	#N/A	#N/A
NA	NA	NA	NA	NA	NA	#VALUE!	NA	#N/A	#N/A
NA	NA	NA	NA	NA	NA	#VALUE!	NA	#N/A	#N/A
NA	NA	NA	NA	NA	NA	#VALUE!	NA	#N/A	#N/A
NA	NA	NA	NA	NA	NA	#VALUE!	NA	#N/A	#N/A
NA	NA	NA	NA	NA	NA	#VALUE!	NA	#N/A	#N/A
NA	NA	NA	NA	NA	NA	#VALUE!	NA	#N/A	#N/A
NA	NA	NA	NA	NA	NA	#VALUE!	NA	#N/A	#N/A
NA	NA	NA	NA	NA	NA	#VALUE!	NA	#N/A	#N/A
NA	NA	NA	NA	NA	NA	#VALUE!	NA	#N/A	#N/A
NA	NA	NA	NA	NA	NA	#VALUE!	NA	#N/A	#N/A
NA	NA	NA	NA	NA	NA	#VALUE!	NA	#N/A	#N/A
NA	NA	NA	NA	NA	NA	#VALUE!	NA	#N/A	#N/A
NA	NA	NA	NA	NA	NA	#VALUE!	NA	#N/A	#N/A
NA	NA	NA	NA	NA	NA	#VALUE!	NA	#N/A	#N/A
NA	NA	NA	NA	NA	NA	#VALUE!	NA	#N/A	#N/A
[truncated: 352 more rows]
