# Supplementary material for: Differential Producibility Analysis (DPA) of Transcriptomic Data with Metabolic Networks: Deconstructing the Metabolic Response of M. tuberculosis
Source: PLoS Comput Biol. 2011 Jun 30;7(6):e1002060. doi: 10.1371/journal.pcbi.1002060 (PMC3127818; doi:10.1371/journal.pcbi.1002060)
Supplement: Table S2 — Top 100 metabolites predicted by DPA and identified by one-class Rank Products analysis (see Materials and Methods) as associated with up-regulated and down-regulated M. tuberculosis genes for each dataset. (XLS) [file pcbi.1002060.s003.xls]

## Sheet: Table S2A
Table S2A. One Class Rank Analysis (DPA) of all datasets: top 100 metabolites associated with up-regulated genes
Index	Macrophage	Succinate	pH4.8	Azide	Sputum	Palmitate(1)	UV	NRP1	Palmitate(2)	Chemostat	Peroxide(1)	Peroxide(2)
1	ALA	PENTADECANOATE	PIxt	3MBECOA	PIxt	DALA	PIxt	DALA	PIxt	DALA	PIxt	OICAP
2	DALA	DGLU	MK	PROPIONYLACP	ISUCC	OCTADECANOATE	METHYLISOCITRATE	ALA	CHOLESTEROL	NH3xt	QA	CBHCAP
3	CHOLESTEROL	MAG	MKH2	3MBUTCOA	DALA	TETRACOSANOATE	GLX	LAC	4ANDROSTENEDIONE	LAC	PROTOPORPHYRINOGEN	MOP
4	DX5P	EICOSANOATE	PPM	HMBUTCOA	ALA	HEXACOSANOATE	HYDROXYAKG	MAL	OXOMETHYLPENTANOATE	CHOLESTEROL-INT	5-AMINO-LEVULINATE	IBUTCOA
5	2PG	HEXADECANOATE	DMK	DPCOA	LAC	9-OCTADECENOATE	2METHYLCITRATE	FUM	MBTB-SER	AC	PROTOPORPHYRIN-IX	MACRCOA
6	HEMT	T3	GGPP	MAACCOA	MAL	HEXADECANOATE	2METHYLCISACONITATE	ASP	BIOTIN-CO2	MAL	COPROPORPHYRINOGEN-III	3MBECOA
7	TETRACOSANOATE	HEXADECANOYL-MAS	NAGDPP	2MBECOA	bALA	EICOSANOATE	HCO3	bALA	bALA	ALA	UROPORPHYRINOGEN-III	3MBUTCOA
8	OCTADECANOATE	TAGcat	DPPPR	PROPIONYLCOA	ASP	ALA	NH3xt	LLAC	DALA	FUM	GLU1SEMIALD	HIBUTCOA
9	HEXACOSANOATE	TAGbio	DPP	ACACP	FUM	PENTADECANOATE	PROPIONYLP	ISUCC	NH3xt	ASP	TRNA-GLU	4PPNCYS
10	9-OCTADECENOATE	NONADECANOATE	DPPR	2MBUTCOA	LLAC	LAC	ICIT	NH3xt	VAL	ISUCC	HYDROXYMETHYLBILANE	4PPNTE
11	EICOSANOATE	ACYL-TRE-S-COA	HPPP	ACP	DMK	MAL	NH3	3PG	OMVAL	LLAC	PORPHOBILILOGIN	3MBUTLIPO
12	HEXADECANOATE	DGLYCERATE	PPPP	ACRCOA	UDPNAM	FUM	CISACONITATE	3PSER	ILE	bALA	HEPTADECANOYL-ACP	MBTB-SER
13	SUCC	OCTADECANOATE	FPP	ACCOA	MPD	ASP	CIT	2PG	MBTCD-HBA	DX5P	PENTADECANOYL-ACP	CYS
14	4ANDROSTENEDIONE	TETRACOSANOATE	ARAFDPP	MBTB-SER	LAM	ISUCC	GLUP	PEP	IBUTCOA	5-AMINO-LEVULINATE	SMALLMOLECULES	DALA
15	GL	HEXACOSANOATE	PENTADECANOATE	4PPNCYS	GLUCAN	LLAC	4ANDROSTENEDIONE	3MBUTLIPO	MACRCOA	GLU1SEMIALD	PENTA-METHYL-TRICONTANOYL-COA	ACCOA
16	IBUTLIPO	9-OCTADECENOATE	9-OCTADECENOATE	RMMALONYLACP	DNA	TAGbio	GLN	3MBECOA	SAH	NAGLUS	MBT	MAS
17	PENTADECANOATE	POLYACYLTREHALOSE	LIPID2	COA	PAP	TAGcat	GABA	3MBUTCOA	PRBATP	PORPHOBILILOGIN	SUCC	HMBUTCOA
18	PHP	GL	DMPP	MBT-HOLO	CL	MAG	HYDROXYGLU	TREHALOSEMONOMYCOLATE(CY)	PIMELOYL-COA	UROPORPHYRINOGEN-III	MALACP	DPCOA
19	PEP	NONADECANOYL-ACP	NPP	MBTA-SAL	RNA	DGLYCERATE	8-AMINO7-OXONONANOATE	TREHALOSEDIMYCOLATE	PRLP	HYDROXYMETHYLBILANE	MYCOLIPENOYL-ACP	MOLYBDOPTERIN
20	3PG	MYCOLIPDIENOYL-ACP	GPP	IBUTCOA	SL-1	NONADECANOATE	AC	TREHALOSEMONOMYCOLATE-P	PRFP	PROTOPORPHYRIN-IX	HEXANOYL-ACP	MAACCOA
21	3PSER	MYCOLIPANOIC-ACP	OPP	MAS	DIM	APO-LIPO	AKG	TREHALOSEMONOMYCOLATE	PRBAMP	PROTOPORPHYRINOGEN	NONANOYL-COA	2MBECOA
22	QA	MYCOLIPENOYL-ACP	HSER	MACRCOA	H2O2	T3	TRNA-GLU	DX5P	4PPNTO	ICIT	PTHIOCERANOYL-COA	PIMELOYL-COA
23	CHOLESTEROL-INT	RMMALONYLACP	IPP	MGLUTCOA	LM	AC3PIM1	CHOLESTEROL	CIS-DELTA-2-19,31-ENOYL-C50-ACYL-ACP	HIBUTCOA	NH3	CIS-DELTA-3-DODECANOYL-COA	MOLYBDENUM
24	HCO3	PAPS	TRE-S	SMMALONYLCOA	BIOMASS	HEXADECANOYL-MAS	NAGLUP	ACYL-TRE-S-COA	LAC	ACETYLP	HEPTADECANOYL-COA	PROPIONYLACP
25	OA	CIS-DELTA-37-ENOYL-DIMETHY-HYDROXY-C56-ACYL-ACP	OCTADECANOATE	CYS	PE	OXOMETHYLPENTANOATE	7-8-DIAMINONONANOATE	CIS-KETO-MEROACYL-ACP	MAL	7-8-DIAMINONONANOATE	HYDROXYPHTHIOCERANOYL-COA	COA
26	PYR	PHOSPHO-PENTA-METHYL-TRICONTANOYL-COA	TETRACOSANOATE	TRE-S	BIOMASSxt	AC4PIM3	NAGLU	MGLUTCOA	ALA	CISACONITATE	TRANS-DELTA-2-DODECANOYL-COA	PROPIONYLCOA
27	LAC	OCTADECANOYL-ACP	EICOSANOATE	4PPNTE	MAPC	GL	NO2	SUCC	FUM	8-AMINO7-OXONONANOATE	UNDECANOYL-COA	MOLYBDOPTERIN-GDP
28	MAL	CIS-DELTA-2-19,37-ENOYL-C56-ACYL-ACP	HEXACOSANOATE	RMMALONYLCOA	P-L-GLX	AC3PIM4	MO2	MOLYBDOPTERIN-GDP	ASP	CIT	MYCOCEROSOYL-MAS	ACACP
29	FUM	HEPTADECANOYL-ACP	LIPID1	HIBUTCOA	PIMS	AC3PIM2	ASER	TRE-S	LLAC	GLN	MBTCD-HBA	2MBUTCOA
30	ASP	PTT	HMB4PP	PPTT	SL1278-WALL	VAL	GLU	CHOLESTEROL	SUCC	AKG	TRANS-DELTA-2-HYDROXY-DODECANOYL-COA	MBT-HOLO
31	ISUCC	MALACP	CO2	PHENOLPHTHIODIOLONE-A	SL1278-CYTO	AC2PIM2	SUCCSAL	DIM-CYTO	HMBUTCOA	P5C	PHOSPHO-PENTA-METHYL-TRICONTANOYL-COA	ACP
32	LLAC	CIS-DELTA-13-ENOYL-C32-ACYL-ACP	HEPPP	HEPTADECANOYL-ACP	UDP[NAM:NGM]ALA	AC2PIM1	DGLU	CIS-DELTA-2-19,37-ENOYL-C56-ACYL-ACP	AICAR	SUCCSAL	PENTADECANOYL-COA	ACRCOA
33	bALA	HEPTANOYL-COA	GALACTANDPP	PTT	H	AC3PIM5	PROTOPORPHYRIN-IX	ACCOA	MAACCOA	NAGLU	TRIDECANOYL-COA	PAPS
34	PENTA-METHYL-TRICONTANOYL	ACYL-MAS	CO2xt	PENTA-METHYL-TRICONTANOYL-COA	UDPNGM	AC3PIM3	5-AMINO-LEVULINATE	IBUTCOA	2MBECOA	NAGLUP	FERO	MBTCD-HBA
35	LIPO	TUBERCULOSTEROYL-ACP	H	ACYL-TRE-S-COA	RHAMNAGDPP	PGP	COPROPORPHYRINOGEN-III	MAS	cAMP	GLUP	FERI	ACYL-TRE-S-COA
36	ADLIPO	CIS-KETO-MEROACYL-ACP	HYDROXYAKG	SAH	SMALLMOLECULES	OMVAL	UROPORPHYRINOGEN-III	PTT	SAICAR	GABA	FE3	NONADECANOYL-COA
37	DLIPO	NONADECANOYL-COA	GL	SAM	HEPPP	AGL3P	GLU1SEMIALD	MAG	SMMALONYLCOA	TRNA-GLU	HEME-FE3	NONADECANOYL-ACP
38	2MBUTLIPO	SMMALONYLCOA	HEXADECANOATE	PAPS	BIOTIN-CO2	POLYACYLTREHALOSE	HYDROXYMETHYLBILANE	CYCLOPROPYL-MEROACYL-ACP	ATP	HYDROXYGLU	FE2	CDPDG
39	C78-3-OXY-MYCOLATE-ENZ	BUTANOYL-COA	GLUCAN	HCYS	DUDP	AC1PIM1	OA	HMBUTCOA	THIP	DGLU	MYCOLIPDIENOYL-ACP	DUDP
40	MAG	CIS-DELTA-2-3,15-ENOYL-C34-ACYL-ACP	LIPID2-AMIDATED	PENTADECANOYL-ACP	UDP[NAM:NGM]ALAGLU	AC1PIM2	PYR	DPCOA	ASUC	GLUGSAL	MBTWALL	CDPDAG-TBA
41	DGLYCERATE	9-OCTADECENOYL-ACP	IGP	PHTHIODIOLONE-A	UDPNAG	AC1PIM3	HSER	MACRCOA	PNTO	QA	HEME-FE2	OMP
42	DETHIOBIOTIN	DOCOSANOYL-ACP	DB4P	MYCOLIPANOIC-ACP	UDPNAGPEE	PS	AHHMD	CIS-DELTA-13-ENOYL-C32-ACYL-ACP	PROPIONYLCOA	PEP	DIM-CYTO	UDP[NAM:NGM]ALA
43	TREHALOSEMONOMYCOLATE	HEXACOSANOYL-ACP	RHAMNAGDPP	TREHALOSEMONOMYCOLATE-P	DCMP	PA	AHTD	MOLYBDOPTERIN	2MBUTCOA	3PG	HEPTANOYL-COA	UDPNAGPEE
44	TAGbio	OCTANOYL-ACP	MDECPP	NONANOYL-COA	DCTP	PG	DGMP	MAACCOA	AMP	OA	HEXANOYL-COA	DCMP
45	AGL3P	CIS-DELTA-19-ENOYL-C38-ACYL-ACP	IBUTLIPO	PTHIOCERANOYL-COA	DCDP	CDPDAG-TBA	DGDP	2MBECOA	MBT-HOLO	PYR	MALCOA	DCTP
46	PHDIM	MBTCD-HBA	APS	MALACP	DUMP	ILE	DGTP	IBUTLIPO	RMMALONYLCOA	HEMT	PENTANOYL-COA	DCDP
47	PHDIM-CYTO	PENTADECANOYL-ACP	PAPS	CIS-DELTA-3-DODECANOYL-COA	DUTP	PI-TBA	NONADECANOATE	BUTANOYL-COA	ADP	DETHIOBIOTIN	PHDIM	DUTP
48	C78MYCOLATE-ENZ	OCTACOSANOYL-ACP	NONADECANOATE	TUBERCULOSTEROYL-ACP	UDPG	AC2PIM3	IBUTLIPO	CIS-DELTA-2-3,15-ENOYL-C34-ACYL-ACP	ABUT	GLX	PPTT	CDP
49	C78MYCOLATE-PP	ACACP	HISOLP	HEPTADECANOYL-COA	GALACTANDPP	AC4PIM1	PENTA-METHYL-TRICONTANOYL	DHF	NPRAN	HYDROXYAKG	PHDIM-CYTO	UDP
50	T3	BETA-KETO-C22-ACYL-ACP	ARABINOGALACTANDPP	HYDROXYPHTHIOCERANOYL-COA	MAG	AC4PIM2	LIPO	MOLYBDENUM	ACRCOA	METHYLISOCITRATE	PPTC	URA
51	MYCOLIPDIENOYL-ACP	D-3-HYDROXY-C22-ACYL-ACP	PRLP	MYCOLIPENOYL-ACP	OSBCOA	AC4PIM5	SUCC	PROPIONYLACP	AN	2METHYLCISACONITATE	OCTANOYL-COA	UDPNAG
52	MEROACYL-AMP	9-HEXADECENOYL-ACP	OBUT	TRANS-DELTA-2-DODECANOYL-COA	ARABINOGALACTANDPP	AC4PIM7	ADLIPO	THF	MBTF-LYS	3PSER	PHENOLPHTHIODIOLONE-A	CMP
53	APO-LIPO	HEXANOYL-ACP	MYCOLIPDIENOYL-ACP	UNDECANOYL-COA	ARA[1]GALACTANDPP	AC4PIM6	DLIPO	CIS-DELTA-19-ENOYL-C38-ACYL-ACP	MBTSEC	2PG	MYCOLIPANOIC-ACP	UDPNGM
54	PGP	CIS-DELTA-2-3,21-ENOYL-C40-ACYL-ACP	ARA[1]GALACTANDPP	MYCOCEROSOYL-MAS	NH3xt	PA-TBA	2MBUTLIPO	COA	PROTOHEME-FE2	PHP	SUCCOA	OROA
55	PS	TRANS-DELTA-2-ENOYL-C22-ACYL-ACP	LAM	TRANS-DELTA-2-HYDROXY-DODECANOYL-COA	UDPGAL	CDPDG	FERO	PROPIONYLCOA	MBTE-LYS	HCO3	PTC	DOROA
56	PA	EICOSANOYL-ACP	DIM	PHOSPHO-PENTA-METHYL-TRICONTANOYL-COA	UDPGALF	LEU	FERI	ACACP	SAM-2-OXOBUTANOATE	COB-II-RINICACID-A-C-DIAMIDE	DECANOYL-COA	UMP
57	PG	TETRADECANOYL-ACP	SL1278-WALL	PENTADECANOYL-COA	PNTO	DAG	FE2	PPTT	DAPIM	COPROPORPHYRINOGEN-III	BUTANOYL-COA	2PCDPMDE
58	PI-TBA	CIS-DELTA-3-ENOYL-C22-ACYL-ACP	DNA	HEXANOYL-ACP	OCTADECANOATE	DTDP4DH6DMAN	MBT	NONADECANOYL-ACP	MBT	2METHYLCITRATE	2MBUTLIPO	UTP
59	PPTC	ACP	SL1278-CYTO	TRIDECANOYL-COA	HEXACOSANOATE	APS	FE3	TRANS-METHOXY-MEROACYL-ACP	MDAPIM	ASER	MBTE-LYS	DUMP
60	AC4PIM3	RMMALONYLCOA	PAP	MYCOLIPDIENOYL-ACP	TETRACOSANOATE	PAPS	MBTWALL	CIS-DELTA-2-3,21-ENOYL-C40-ACYL-ACP	SUCCOA	GLU	PROTOHEME-FE2	UDPG
61	AC4PIM7	HEXADECANOYL-ACP	CL	PTC	EICOSANOATE	DTMP	FTHF	2MBUTCOA	CADA	HYDROGENOBYRINATE-A-C-DIAMIDE	MBTF-LYS	MAG
62	DAG	PHTHIODIOLONE-A	RNA	DIM-CYTO	HEXADECANOATE	DTDP4DH6DGLC	METHF	C78MYCOLATE-PP	RMMALONYLACP	COB-I-RINICACID-A-C-DIAMIDE	LIPID2-AMIDATED	TUBERCULOSTEROYL-ACP
63	TAGcat	TETRACOSANOYL-ACP	SL-1	LLCT	9-OCTADECENOATE	OICAP	F420-0	TRANS-DELTA-2-ENOYL-C22-ACYL-ACP	GAR	4ANDROSTENEDIONE	PTT	DIACYLTREHALOSE
64	MYCOTHIOL	APS	MPD	HEXANOYL-COA	DGLYCERATE	DIACYLTREHALOSE	DHPT	MBT-HOLO	LYS	PROTOHEME-FE2	PENTA-METHYL-TRICONTANOYL	AGL3P
65	PHDIMRHAM1	DHPT	C78MYCOLATE-PP	DECANOYL-COA	T3	CBHCAP	MTHF	CIS-DELTA-3-ENOYL-C22-ACYL-ACP	SAOPIM	MBTWALL	LIPO	TETRADECANOYL-COA
66	PHDIMRHAM2	THF	LM	BUTANOYL-COA	CDP	IPPMAL	PORPHOBILILOGIN	CIS-METHOXY-MEROACYL-ACP	PAP	HEME-FE3	MGLUTCOA	TAGbio
67	AC3PIM4	MTHF	BIOMASS	MALCOA	NAGDPP	MOP	CO2	ACP	LIPID2	HEME-FE2	SMMALONYLCOA	POLYACYLTREHALOSE
68	AC3PIM2	PTC	PE	OCTANOYL-ACP	CTP	OAHSER	CO2xt	CDPDG	HEME-FE3	CHOLESTEROL	NONADECANOATE	TAGcat
69	HEPTADECANOYL-ACP	NONANOYL-COA	BIOMASSxt	PENTANOYL-COA	UDP	3MBUTLIPO	PROTOPORPHYRINOGEN	PHENOLPHTHIODIOLONE-A	HEME-FE2	PROPIONYLP	PHDIMRHAM1	OCTANOYL-ACP
70	MALACP	EICOSANOYL-COA	MAPC	NONADECANOYL-ACP	CPAD5P	A160GL3P	SER	PHTHIODIOLONE-A	FE3	MBTSEC	MYCOSIDE_B	SUCC
71	AC2PIM2	ACCOA	P-L-GLX	OCTANOYL-COA	URA	DTTP	ACETYLP	HIBUTCOA	GLY	FE2	PHDIMRHAM2	PA
72	AC2PIM1	IBUTCOA	PIMS	TETRADECANOYL-ACP	ARGSUCC	DTDP	PHP	ACRCOA	SDAPIM	HMB4PP	ADLIPO	TETRADECANOYL-ACP
73	AC3PIM5	MAS	TS-PROTEIN	PHDIM	NPP	SAM	CHOLESTEROL-INT	H	UDP[NAM:NGM]AGMDAPIM	MDECPP	RMMALONYLCOA	DAG
74	AC3PIM3	CYCLOPROPYL-MEROACYL-ACP	CPAD5P	PHDIM-CYTO	PIMELOYL-COA	DTDPGLC	3PG	H2SO3	ARABINOGALACTAN_PEPTIDOGLYCAN	HYDROGENOBYRINATE	PHTHIODIOLONE-A	EICOSANOYL-COA
75	MYCOLIPENOYL-ACP	PENTA-METHYL-TRICONTANOYL-COA	PHPAA-COA	OSBCOA	CMP	DTDPRHAM	DETHIOBIOTIN	SAICAR	UDP[NAM:NGM]AGMDAPIMAA	DMK	DLIPO	OCTADECANOYL-ACP
76	AC1PIM1	PTHIOCERANOYL-COA	HBA	PHPAA-COA	DHN	FADH2	MEROACYL-AMP	UDPGAL	LAM	MBT	SAM-2-OXOBUTANOATE	CIS-DELTA-2-19,37-ENOYL-C56-ACYL-ACP
77	AC1PIM2	HMBUTCOA	TRP	PHDIMRHAM1	PROPIONYLACP	PGL-TB	FOR	PTC	DNA	FE3	MBTSEC	CIS-DELTA-2-19,31-ENOYL-C50-ACYL-ACP
78	AC1PIM3	MACRCOA	NPRAN	PHDIMRHAM2	OPP	PIMELOYL-COA	HYXN	NONANOYL-COA	CL	2PCDPMDE	RMMALONYLACP	CIS-DELTA-13-ENOYL-C32-ACYL-ACP
79	PENTADECANOYL-ACP	CIS-DELTA-2-19,31-ENOYL-C50-ACYL-ACP	SAL	PPTC	UMP	DODECANOYL-COA	AD	HEPTADECANOYL-ACP	RNA	FERO	LIPID1	PGP
80	AC2PIM3	CIS-DELTA-3-DODECANOYL-COA	AN	HEPTANOYL-COA	2PCDPMDE	CIS-DELTA-5-TETRADECANOYL-COA	METTHF	PENTA-METHYL-TRICONTANOYL-COA	SL-1	FERI	PRECORIN-4B	OCTADECANOYL-COA
81	HEXANOYL-ACP	MAACCOA	H2O2	PRO	UTP	PHDIMRHAM1	PROTOHEME-FE2	PTHIOCERANOYL-COA	TETRACOSANOATE	SMALLMOLECULES	IBUTLIPO	HEXADECANOYL-MAS
82	A160GL3P	CIS-DELTA-37-ENOYL-METHY-HYDROXY-C56-ACYL-ACP	SMALLMOLECULES	APS	ARG	PHDIMRHAM2	PRECURSOR-Z	MALACP	FERO	NAG-INS	PHPAA-COA	CIS-DELTA-2-3,15-ENOYL-C34-ACYL-ACP
83	AC4PIM1	2MBECOA	PPTT	NONADECANOYL-COA	MBTA-SAL	MBTA-SAL	DHF	CIS-DELTA-3-DODECANOYL-COA	FERI	DIHYDROXYMETHYLPENTANOATE	ORN	9-OCTADECENOYL-COA
84	AC4PIM2	HEXANOYL-COA	PPTC	TETRADECANOYL-COA	AKP	ACYL-MAS	THF	AHHMD	MBTWALL	OAHSER	THR	TETRACOSANOYL-COA
85	PA-TBA	OCTADECANOYL-COA	PHENOLPHTHIODIOLONE-A	CYS-NG-INS	CDPMDE	NONADECANOYL-COA	PRLP	HEXANOYL-COA	FE2	CAASP	1-AMINO-PROPAN-2-OL	9-OCTADECENOYL-ACP
86	MYCOSIDE_B	HEPTADECANOYL-COA	PABA	PIMELOYL-COA	CIS-DELTA-2-19,37-ENOYL-C56-ACYL-ACP	NONADECANOYL-ACP	D6PGL	HEPTADECANOYL-COA	PEPTIDOGLYCAN	ALAALA	PTRSC	DOCOSANOYL-ACP
87	CYS-NG-INS	DECANOYL-COA	TYR	H2S	NG-INS	ACCOA	A6RP5P2	DECANOYL-COA	ADENOSYL-COBRINICACID-A-C-DIAMIDE	GLY	NONADECANOYL-ACP	HEXACOSANOYL-ACP
88	CYS	HYDROXYPHTHIOCERANOYL-COA	PHEN	MBTCD-HBA	IBUTCOA	IBUTCOA	A6RP	LIPO	COB-II	POLYACYLTREHALOSE	GGPP	HEXADECANOYL-COA
89	GLUP	MGLUTCOA	PHE	DODECANOYL-COA	GGPP	MAS	SAOPIM	HYDROXYPHTHIOCERANOYL-COA	COB-I	PRECORIN-8X	PRECORIN-3B	CIS-DELTA-19-ENOYL-C38-ACYL-ACP
90	PTC	TETRADECANOYL-COA	TS-COSH-TYR	MOLYBDOPTERIN-GDP	MACRCOA	HMBUTCOA	APO-LIPO	PAPS	ADENOSYL-COBRATE	ADENOSYL-COBRATE	HPPP	PS
91	NONANOYL-COA	TRANS-DELTA-2-DODECANOYL-COA	BIOTIN-CO2	CIS-DELTA-5-TETRADECANOYL-COA	DPPPR	MACRCOA	THR	PHPAA-COA	ADENOSYLCOBINIMIDE-P	DHN	PPPP	PG
92	DIM-CYTO	MBTB-SER	4ANDROSTENEDIONE	MYCOTHIOL	CIS-DELTA-13-ENOYL-C32-ACYL-ACP	MAACCOA	1-AMINO-PROPAN-2-OL	MYCOLIPENOYL-ACP	COB-III	CTP	FPP	OCTACOSANOYL-COA
93	AC3PIM1	MALCOA	GLX	C78MYCOLATE-ENZ	MK	2MBECOA	DIHYDROXYMETHYLPENTANOATE	TRANS-DELTA-2-DODECANOYL-COA	DIM	OMP	CIS-METHOXY-MEROACYL-ACP	OCTACOSANOYL-ACP
94	PTHIOCERANOYL-COA	9-OCTADECENOYL-COA	METHYLISOCITRATE	TETRAHYDRODIPICOLINATE	DHSK	SMMALONYLCOA	PROTEIN	MBTB-SER	EICOSANOYL-COA	UDPNAGPEE	DMPP	BETA-KETO-C22-ACYL-ACP
95	CIS-DELTA-3-DODECANOYL-COA	UNDECANOYL-COA	HEME-FE3	HEXACOSANOYL-COA-CO2	DPP	3MBECOA	MOLYBDOPTERIN-GDP	MALCOA	OCTADECANOYL-ACP	OROA	HMB4PP	D-3-HYDROXY-C22-ACYL-ACP
96	CIS-DELTA-37-ENOYL-METHY-HYDROXY-C56-ACYL-ACP	MYCOCEROSOYL-MAS	HEME-FE2	PROPIONYLP	NAG-INS	MBTB-SER	P5C	UNDECANOYL-COA	GLU	AC3PIM1	PRECORIN-5	9-HEXADECENOYL-ACP
97	HEXANOYL-COA	TETRACOSANOYL-COA	MAG	MET	PABA	PROPIONYLACP	NAGLUS	MYCOCEROSOYL-MAS	OCTADECANOYL-COA	ADENOSYL-COBRINICACID-A-C-DIAMIDE	PRECORIN-2	HEXACOSANOYL-COA
98	HEPTADECANOYL-COA	PROPIONYLACP	PHDIMRHAM1	ORN	3MBECOA	COA	GLUGSAL	PHDIMRHAM1	ACYL-MAS	HCYS	DPPPR	A160GL3P
99	HYDROXYPHTHIOCERANOYL-COA	HEXADECANOYL-COA	MYCOSIDE_B	PTRSC	CYS-NG-INS	PROPIONYLCOA	2PG	PENTANOYL-COA	ACYL-TRE-S-COA	UDP[NAM:NGM]AGMDAPIMAA	DPP	TRANS-DELTA-2-ENOYL-C22-ACYL-ACP
100	CIS-KETO-MEROACYL-ACP	PENTANOYL-COA	PHDIM	NO3	DPPR	ACACP	CO-II	MBTCD-HBA	9-OCTADECENOYL-COA	MDAPIM	ACYL-MAS	EICOSANOYL-ACP

## Sheet: Table S2B
Table S2B. One Class Rank Analysis (DPA) of all mouse macrophage datasets: top 100 metabolites associated with down-regulated genes
index	Macrophage	Succinate	pH4.8	Azide	Sputum	Palmitate(1)	UV	NRP1	Palmitate(2)	Chemostat	Peroxide(1)	Peroxide(2)
1	NO2	SLFxt	QA	PIxt	NO3	PIxt	PIxt	NO3	3PG	HEXANOATE	PIxt	3PG
2	MO2	HEXANOATE	OA	LLAC	CHOLESTEROL-INT	NO3	ARABINOGALACTAN_PEPTIDOGLYCAN	HEXANOATE	3PSER	PROPANOATE	NO3	PEP
3	HEXANOATE	PROPANOATE	PYR	bALA	DALA	CO-II	UDP[NAM:NGM]AGMDAPIMAA	PROPANOATE	2PG	OSLHSER	CO-II	3PSER
4	PROPANOATE	OSLHSER	NO2	DALA	LLAC	NO2	EICOSANOATE	OSLHSER	PEP	PHOSPHATIDYLCHOLINE	NO2	2PG
5	OSLHSER	PHOSPHATIDYLCHOLINE	SER	ALA	LAC	MO2	PROTOHEME-FE2	PHOSPHATIDYLCHOLINE	DX5P	F1P	MO2	HEMT
6	PHOSPHATIDYLCHOLINE	F1P	MO2	MAL	MAL	QA	LIPID2	F1P	HEMT	TETRADECANOATE	DQT	AD
7	F1P	TETRADECANOATE	CHOLESTEROL-INT	FUM	ALA	PHP	MBTSEC	TETRADECANOATE	SLFxt	DECANOATE	LLCT	HYXN
8	TETRADECANOATE	DECANOATE	HCO3	ASP	FUM	CHOLESTEROL-INT	UDP[NAM:NGM]AGMDAPIM	DECANOATE	DHSK	RIB	DHSK	ARABINOGALACTAN_PEPTIDOGLYCAN
9	DECANOATE	RIB	PEP	OBUT	ASP	OA	HEXADECANOATE	RIB	DQT	DODECANOATE	HCYS	DX5P
10	RIB	DODECANOATE	CO-II	CO-II	ISUCC	PYR	PEPTIDOGLYCAN	DODECANOATE	2-PHOSPHO-L-LACTATE	ETH	DCTP	HEXANOATE
11	DODECANOATE	ETH	3PSER	NO2	bALA	SER	MBT	ETH	DHAP	DOCOSANOATE	DCDP	PROPANOATE
12	ETH	DOCOSANOATE	2PG	NO3	HEXANOATE	HCO3	T3	DOCOSANOATE	GLC	DR5P	DUTP	OSLHSER
13	DOCOSANOATE	DR5P	3PG	MO2	PROPANOATE	4ANDROSTENEDIONE	CDPDG	DR5P	S7P	HIBUT	4HPP	PHOSPHATIDYLCHOLINE
14	DR5P	HIBUT	PHP	CHOLESTEROL-INT	OSLHSER	DETHIOBIOTIN	LLCT	HIBUT	ALAALA	HEPTADECANOATE	CTP	F1P
15	HIBUT	HEPTADECANOATE	DX5P	ACLAC	PHOSPHATIDYLCHOLINE	CHOLESTEROL	FERO	HEPTADECANOATE	TRE	ACAL	SER	TETRADECANOATE
16	HEPTADECANOATE	ACAL	HEMT	PHP	F1P	ASER	FERI	ACAL	AHMMP	9-HEXADECENOATE	DHN	DECANOATE
17	ACAL	9-HEXADECENOATE	HYDROXYGLU	ASPSA	TETRADECANOATE	APO-LIPO	CADA	9-HEXADECENOATE	RL5P	METHYMALONATE	QA	RIB
18	9-HEXADECENOATE	METHYMALONATE	5-AMINO-LEVULINATE	HSER	GLYCOLATE	8-AMINO7-OXONONANOATE	MDAPIM	METHYMALONATE	GLCxt	ISUCC	DCMP	DODECANOATE
19	METHYMALONATE	PIxt	AKG	SER	DECANOATE	DHMVA	LYS	PEP	MAHMPPP	3PSER	HOMOGEN	ETH
20	CO-II	ASER	UROPORPHYRINOGEN-III	QA	RIB	GLX	FE3	LLAC	G1P	3PG	UDPGALF	DOCOSANOATE
21	OA	NO3	HYDROXYMETHYLBILANE	OA	DODECANOATE	7-8-DIAMINONONANOATE	MAG	DX5P	CAP	SLFxt	CHOLESTEROL-INT	DR5P
22	PYR	SER	PORPHOBILILOGIN	PYR	ETH	2METHYLCITRATE	POLYACYLTREHALOSE	HEMT	FGAR	2PG	TETRAHYDRODIPICOLINATE	HIBUT
23	SER	NO2	HYXN	ASER	DOCOSANOATE	HCYS	HEME-FE3	3PG	FGAM	PEP	OA	HEPTADECANOATE
24	CHOLESTEROL-INT	MO2	AD	AC	DR5P	PROPIONYLP	HEME-FE2	3PSER	X5P	PHP	PYR	ACAL
25	NO3	CO-II	ACETYLP	7-8-DIAMINONONANOATE	HIBUT	AC	OCTADECANOATE	2PG	PPI	GLUP	DUMP	9-HEXADECENOATE
26	QA	QA	GLYCOLATE	2METHYLCITRATE	HEPTADECANOATE	NAGLUS	TETRACOSANOATE	DQT	bDG1P	NO3	CDP	METHYMALONATE
27	HCO3	OA	ISUCC	PROPIONYLP	ACAL	HYDROXYAKG	HEXACOSANOATE	DHSK	AMPMP	PNTO	3PSER	TS-PROTEIN
28	AC	PYR	HEXANOATE	8-AMINO7-OXONONANOATE	9-HEXADECENOATE	ICIT	HIS	HOMOGEN	ASN	HEMT	UDP	UDPNAM
29	PHP	NAGLUS	PROPANOATE	METHYLISOCITRATE	METHYMALONATE	NH3	AGL3P	4HPP	MLT	OA	URA	UDP[NAM:NGM]ALA
30	8-AMINO7-OXONONANOATE	CHOLESTEROL-INT	OSLHSER	2METHYLCISACONITATE	NO2	ACETYLP	NONADECANOYL-ACP	PHP	bDGLC	PYR	DIHYDRODIPICOLINATE	bDGLC
31	ICIT	HCO3	PHOSPHATIDYLCHOLINE	DETHIOBIOTIN	QA	METHYLISOCITRATE	4PPNTE	CHOLESTEROL-INT	DR1P	PANT	HEMT	UDPGAL
32	NH3	8-AMINO7-OXONONANOATE	F1P	DUDP	MO2	NAGLU	DAPIM	PPI	THI	DX5P	OMP	UDPNGM
33	CISACONITATE	NAGLU	TETRADECANOATE	IPPMAL	OA	NAGLUP	LIPID1	2-PHOSPHO-L-LACTATE	MAN1P	MI	CMP	PRAM
34	CIT	GLX	DECANOATE	CBHCAP	PYR	ACLAC	NO3	MLT	THIP	GLC	DUDP	GLYCOLATE
35	ISUCC	HYDROXYAKG	RIB	LEU	CO-II	CISACONITATE	9-OCTADECENOATE	bDGLC	FDP	bDG6P	UDPGAL	AICAR
36	ASER	ICIT	DODECANOATE	F420-0	SER	CIT	MBTE-LYS	ALAALA	OROA	S7P	UDPNGM	DHAP
37	GLN	NH3	ETH	HCYS	HCO3	2METHYLCISACONITATE	MBTF-LYS	OA	E4P	NAMN	UMP	GLC
38	GLU	SUCCSAL	DOCOSANOATE	OCTADECANOYL-ACP	3PSER	GLN	PROTEIN	PYR	PI	IP	PEP	TYR
39	SUCCSAL	CISACONITATE	DR5P	ACYL-MAS	2PG	AKG	SAM-2-OXOBUTANOATE	GLCxt	DOROA	HCO3	2PCDPMDE	SAICAR
40	7-8-DIAMINONONANOATE	CIT	HIBUT	PIMELOYL-COA	PEP	P5C	SDAPIM	NG-INS	MPET	HYXN	UTP	S7P
41	GABA	AC	HEPTADECANOATE	TRANS-DELTA-2-ENOYL-C22-ACYL-ACP	3PG	SUCCSAL	LIPID2-AMIDATED	DHAP	3DDAH7P	AD	HYXN	MAN1P
42	DGLU	GLN	ACAL	HEXACOSANOYL-COA-CO2	HEMT	THR	H2SO3	MDE4P	F6P	HYDROXYAKG	HCO3	OROA
43	GLX	AKG	9-HEXADECENOATE	4PPNTO	DX5P	1-AMINO-PROPAN-2-OL	CYS	THI	AIR	METHYLISOCITRATE	UDPG	UDPGALF
44	AKG	GLU	METHYMALONATE	EICOSANOYL-COA	HYXN	GLUP	3PSER	MPET	G3P	AHMMP	PHSER	MAN6P
45	NAGLU	P5C	DQT	IBUTCOA	AD	GABA	2PG	MAN6P	R5P	MAHMPPP	DHMVA	TS-COSH-TYR
46	HYDROXYGLU	METHYLISOCITRATE	LAC	CIS-DELTA-2-19,31-ENOYL-C50-ACYL-ACP	OCTADECANOATE	HSER	PENTADECANOATE	GA1P	GLxt	G1P	SME3P	TRP
47	HYDROXYAKG	2METHYLCITRATE	MAL	CIS-DELTA-13-ENOYL-C32-ACYL-ACP	TETRACOSANOATE	OAHSER	SAOPIM	SER	CAASP	DB4P	CAP	GMP
48	METHYLISOCITRATE	GABA	ALA	OCTADECANOYL-COA	HEXACOSANOATE	HYDROXYGLU	SUCC	CO-II	13PDG	FGAR	DX5P	UDPG
49	2METHYLCITRATE	DGLU	ASP	TUBERCULOSTEROYL-ACP	9-OCTADECENOATE	OBUT	GL	NO2	R1P	FGAM	UDPNAG	CIS-DELTA-2-19,37-ENOYL-C56-ACYL-ACP
50	TRNA-GLU	GLUGSAL	GLN	PHPAA-COA	DTMP	DGLU	PENTA-METHYL-TRICONTANOYL	MO2	TRE6P	X5P	S7P	TREHALOSEMONOMYCOLATE-P
51	2METHYLCISACONITATE	2METHYLCISACONITATE	GLX	MBTB-SER	CTP	GLUGSAL	IBUTLIPO	MAL	G6P	PRFICA	COPROPORPHYRINOGEN-III	TRANS-METHOXY-MEROACYL-ACP
52	P5C	GLU1SEMIALD	GLU	CIS-DELTA-2-3,15-ENOYL-C34-ACYL-ACP	RIBFLAV	FE2	NONADECANOATE	ALA	GA6P	bDG1P	H2S	DGLYCERATE
53	4ANDROSTENEDIONE	PROTOPORPHYRINOGEN	HYDROXYAKG	9-OCTADECENOYL-COA	O2xt	GLU	SUCCOA	ISUCC	AD	AMPMP	UDP[NAM:NGM]ALA	T3
54	GLUGSAL	PHP	P5C	TETRACOSANOYL-COA	O2	3PSER	BIOTIN	QA	PRPP	O2xt	UDPNAGPEE	AHMMP
55	CHOLESTEROL	HYDROXYGLU	ICIT	9-OCTADECENOYL-ACP	MOLYBDOPTERIN	PRO	MGLUTCOA	DHMVA	ASP4P	DR1P	2PG	MEROACYL-AMP
56	3PG	5-AMINO-LEVULINATE	NH3	DOCOSANOYL-ACP	2-PHOSPHO-L-LACTATE	GLU1SEMIALD	SMMALONYLCOA	LAC	NACN	FDP	O2xt	PHSER
57	3PSER	COPROPORPHYRINOGEN-III	SUCCSAL	HEXACOSANOYL-ACP	DGMP	IPPMAL	RMMALONYLACP	DALA	AICAR	E4P	ACLAC	MAHMPPP
58	2PG	4ANDROSTENEDIONE	2METHYLCITRATE	PROPIONYLACP	DGDP	ASPSA	BIOTIN-BCCP	FUM	MI	PI	OROA	PEPTIDOGLYCAN
59	PEP	FOR	COPROPORPHYRINOGEN-III	HEXADECANOYL-COA	DGTP	OICAP	MBTWALL	ASP	SME	MAN6P	PROTOPORPHYRINOGEN	CDP
60	GLYCOLATE	7-8-DIAMINONONANOATE	GLU1SEMIALD	CIS-DELTA-19-ENOYL-C38-ACYL-ACP	DUMP	CBHCAP	RMMALONYLCOA	D6RP5P	MDE4P	F6P	ASPSA	IGP
61	NAGLUS	CHOLESTEROL	PROTOPORPHYRINOGEN	OCTACOSANOYL-COA	PHP	MOP	FE2	XMP	DIHYDRODIPICOLINATE	AIR	DOROA	G1P
62	NAGLUP	F420-0	GABA	OCTACOSANOYL-ACP	PENTADECANOATE	PGL-TB	MET	A6RP5P	bDG6P	G3P	HSER	CAP
63	GLUP	FO	TRNA-GLU	9-HEXADECENOYL-COA	EICOSANOATE	MBTWALL	2MBUTLIPO	DHP	OMP	R5P	3PG	DB4P
64	5-AMINO-LEVULINATE	D6PGL	DGLU	BETA-KETO-C22-ACYL-ACP	HEXADECANOATE	PA-TBA	PENTA-METHYL-TRICONTANOYL-COA	AHMMP	SLF	GLxt	ARG	UDP
65	COPROPORPHYRINOGEN-III	F420	GLUGSAL	D-3-HYDROXY-C22-ACYL-ACP	MOLYBDENUM	AHHMP	SAM	MAHMPPP	H	PRAM	OBUT	URA
66	UROPORPHYRINOGEN-III	D6PGC	CISACONITATE	9-HEXADECENOYL-ACP	MOLYBDOPTERIN-GDP	RIBFLAV	LIPO	HMB4PP	MAN6P	13PDG	CDPMDE	FGAR
67	GLU1SEMIALD	GLUP	CIT	HEXACOSANOYL-COA	FAD	D6RP5P	PHOSPHO-PENTA-METHYL-TRICONTANOYL-COA	NACN	IP	R1P	PHPYR	FGAM
68	HYDROXYMETHYLBILANE	PROTOPORPHYRIN-IX	AC	EICOSANOYL-ACP	RL5P	GMP	MYCOLIPDIENOYL-ACP	G1P	HYXN	G6P	AD	X5P
69	PORPHOBILILOGIN	UROPORPHYRINOGEN-III	bALA	CIS-DELTA-3-ENOYL-C22-ACYL-ACP	DTTP	A6RP5P	DLIPO	AHHMP	PRAM	PRPP	DMK	PHEN
70	DX5P	HYDROXYMETHYLBILANE	DHSK	DOCOSANOYL-COA	DTDP	FO	MYCOLIPANOIC-ACP	DB4P	GA1P	CAIR	NAGLUS	bDG1P
71	HEMT	PORPHOBILILOGIN	DALA	HEXADECANOYL-ACP	FMN	DHP	DGLYCERATE	LPPG	CAIR	NO2	ARABINOGALACTAN_PEPTIDOGLYCAN	AMPMP
72	HYXN	NAGLUP	FUM	TETRACOSANOYL-ACP	D8RL	MBTCD-HBA	TUBERCULOSTEROYL-ACP	MDECPP	PRFICA	SER	LIPID2	H2S
73	AD	3PSER	LLAC	OICAP	H2SO3	XMP	ACYL-TRE-S-COA	FGAR	SAICAR	MO2	RL5P	OMP
74	SLFxt	TRNA-GLU	7-8-DIAMINONONANOATE	MOP	LPPG	GDPMAN	DIACYLTREHALOSE	FGAM	IMACP	CHOLESTEROL-INT	ASP4P	DA
75	PROTOPORPHYRINOGEN	PRO	METHYLISOCITRATE	VAL	DIHYDRODIPICOLINATE	MYCOLIPENOYL-ACP	NONADECANOYL-COA	X5P	CDP	AKP	MI	2-PHOSPHO-L-LACTATE
76	PROTOPORPHYRIN-IX	1-AMINO-PROPAN-2-OL	PROTOPORPHYRIN-IX	DHMVA	DTDPGLC	MYCOLIPDIENOYL-ACP	4PPNCYS	SAICAR	CTP	DHN	GLN	CYS
77	DETHIOBIOTIN	DETHIOBIOTIN	NAGLU	FO	PPI	MYCOLIPANOIC-ACP	PA	bDG1P	H2SO3	GMP	5-AMINO-LEVULINATE	CMP
78	DHMVA	PROPIONYLP	GLUP	OMVAL	PRECURSOR-Z	FOR	CDPDAG-TBA	AMPMP	SME3P	RL5P	SME	MLT
79	PROPIONYLP	PGL-TB	2METHYLCISACONITATE	CO2	4PPNCYS	PPTT	3MBUTLIPO	H2S	DB4P	GLCxt	AKG	SLF
80	ACETYLP	PHDIM	O2xt	THR	DQT	PTC	DAG	SLF	LPPG	ASP4P	GLU	DCMP
81	ACLAC	PHDIMRHAM2	O2	1-AMINO-PROPAN-2-OL	THI	MALACP	NONANOYL-COA	DR1P	CHOR	NACN	H2SO3	DR1P
82	FUM	PHDIM-CYTO	HMB4PP	DGMP	D6RP5P	HEPTANOYL-COA	DIM-CYTO	THIP	UDP	AICAR	P5C	D6RP5P
83	CO2	PPTC	MDECPP	PNTO	OROA	HEXANOYL-ACP	HEPTADECANOYL-ACP	FDP	GL3P	CAP	SAH	PHE
84	CO2xt	APO-LIPO	ASN	ILE	DCTP	RMMALONYLACP	PTHIOCERANOYL-COA	E4P	URA	GL3P	SUCCSAL	HOMOGEN
85	HSER	DHF	THI	OXOMETHYLPENTANOATE	MPET	PHDIM	CIS-DELTA-3-DODECANOYL-COA	PI	ARGSUCC	SAICAR	bDG6P	FDP
86	S7P	HCYS	THIP	OAHSER	PNTO	PHDIM-CYTO	HEPTADECANOYL-COA	NAMN	PHEN	ASN	ARGSUCC	E4P
87	2-PHOSPHO-L-LACTATE	PHDIMRHAM1	MPET	CAASP	XMP	PPTC	MYCOLIPENOYL-ACP	F6P	IMP	IMP	PHEN	PI
88	THI	ADLIPO	CAIR	TETRAHYDRODIPICOLINATE	DCDP	LEU	TRANS-DELTA-2-DODECANOYL-COA	AIR	H2S	THI	ASN	DOROA
89	THIP	MTHF	AHMMP	CO2xt	PANT	HEPTADECANOYL-ACP	UNDECANOYL-COA	G3P	DA	MAN1P	PROTOPORPHYRIN-IX	TREHALOSEMONOMYCOLATE
90	MPET	THF	MAHMPPP	CIS-DELTA-2-19,37-ENOYL-C56-ACYL-ACP	AKP	HEXANOYL-COA	MYCOCEROSOYL-MAS	cGMP	CMP	THIP	NAGLU	UMP
91	DALA	MET	AICAR	TETRADECANOYL-COA	4PPNTO	LIPO	DTMP	R5P	CITR	OROA	CYS	XMP
92	MAL	IBUTLIPO	G1P	OCTANOYL-ACP	GMP	BUTANOYL-COA	PENTADECANOYL-ACP	HYXN	UDPGAL	DOROA	4ANDROSTENEDIONE	F6P
93	ALA	LIPO	DB4P	NONADECANOYL-ACP	GDP	MALCOA	TRANS-DELTA-2-HYDROXY-DODECANOYL-COA	TRE-S	ASUC	ASUC	UROPORPHYRINOGEN-III	AIR
94	LLAC	DLIPO	PRBATP	TETRADECANOYL-ACP	DUTP	PENTANOYL-COA	PENTADECANOYL-COA	AKP	UMP	MPET	CITR	G3P
95	AHMMP	METTHF	bDG6P	MACRCOA	A6RP5P	PENTADECANOYL-ACP	ADLIPO	13PDG	NAMN	3DDAH7P	THR	UTP
96	RL5P	RIBFLAV	FGAR	HEXADECANOYL-MAS	IMACP	OCTANOYL-COA	TRIDECANOYL-COA	R1P	UTP	O2	PHE	R5P
97	MAHMPPP	GDPMAN	FGAM	RMMALONYLACP	INS	DLIPO	H2S	TRE	ARG	CAASP	PHP	GLxt
98	G1P	SAM	X5P	MBTCD-HBA	DTDP4DH6DMAN	PHOSPHO-PENTA-METHYL-TRICONTANOYL-COA	AC3PIM1	TRE6P	TRE-S	GA6P	UDP[NAM:NGM]AGMDAPIM	CAASP
99	FGAR	MALACP	PRFICA	PPTT	DATP	TRANS-METHOXY-MEROACYL-ACP	AC4PIM3	GMP	O2	4PPNTO	GABA	13PDG
100	FGAM	HEXANOYL-COA	SAICAR	CIS-DELTA-2-3,21-ENOYL-C40-ACYL-ACP	HIS	FERO	PTT	GDP	PRBAMP	GLX	3DDAH7P	R1P
